# Supplementary material for: The clinical and biological characteristics of NUP98-KDM5A pediatric acute myeloid leukemia
Source: PubMed Central journal article supplement — Haematologica. 2020 May 7;106(2):630–4. doi: 10.3324/haematol.2019.236745 (PMC7849578; doi:10.3324/haematol.2019.236745), 2020-05-07
Supplement: 2019_236745-Disclosures_Contributions.pdf [file 2019_236745-Disclosures_Contributions.pdf]

Haematologica  
HAEMATOL/2019/236745  
Version 4

The clinical and biological characteristics of NUP98-KDM5A in pediatric acute myeloid leukemia

Sanne Noort, Priscilla Wander, Todd A. Alonzo, Jenny Smith, Rhonda E. Ries, Robert B. Gerbing, M. Emmy M. Dolman, Franco Locatelli, Dirk Reinhardt, Andre Baruchel, Jan Stary, Jan J. Molenaar, Ronald W. Stam, Marry M. van den Heuvel-Eibrink, C. Michel Zwaan, and Soheil Meshinchi

Disclosures: None

Contributions: S.N., P.W., R.W.S., C.M.Z., M.M.v.d.H.-E., S.M. designed the study; T.A.A., R.B.G., F.L., D.R., A.B., J.S., J.J.M., R.W.S., C.M.Z. contributed materials and clinical data; P.W., M.E.M.D. and S.N. performed the experiments; S.N., P.W., T.A.A., J.S., R.E.R., R.B.G., R.W.S., M.M.v.d.H.-E., C.M.Z., S.M. analyzed data; S.N., P.W., T.A.A., J.S. R.E.R. and R.B.G. performed statistical analysis; S.N., P.W., R.W.S., C.M.Z., M.M.v.d.H.-E. and S.M. wrote the paper; S.M., R.W.S., C.M.Z. and M.M.v.d.H.-E. supervised the study; and all coauthors performed critical review of the manuscript and gave their final approval.
