# Supplementary material for: The clinical and biological characteristics of NUP98-KDM5A pediatric acute myeloid leukemia
Source: PubMed Central journal article supplement — Haematologica. 2020 May 7;106(2):630–4. doi: 10.3324/haematol.2019.236745 (PMC7849578; doi:10.3324/haematol.2019.236745), 2020-05-07
Supplement: 2019_236745_NOORT_SUPPL.pdf [file 2019_236745_NOORT_SUPPL.pdf]

**The clinical and biological characteristics of NUP98-KDM5A pediatric acute myeloid leukemia**

Sanne Noort,<sup>1\*</sup> Priscilla Wander,<sup>1,2\*</sup> Todd A. Alonzo,<sup>3,4</sup> Jenny Smith,<sup>5</sup> Rhonda E. Ries,<sup>5</sup> Robert B. Gerbing,<sup>3</sup> M. Emmy M. Dolman,<sup>2</sup> Franco Locatelli,<sup>6</sup> Dirk Reinhardt,<sup>7</sup> Andre Baruchel,<sup>8</sup> Jan Stary,<sup>9</sup> Jan J. Molenaar,<sup>2</sup> Ronald W. Stam,<sup>2</sup> Marry M. van den Heuvel-Eibrink,<sup>1,2</sup> C. Michel Zwaan<sup>1,2,10</sup> and Soheil Meshinchi<sup>5,11</sup>

<sup>1</sup>Department of Pediatric Oncology/Hematology, Erasmus MC-Sophia Children's Hospital Rotterdam, the Netherlands; <sup>2</sup>Princess Máxima Center for Pediatric Oncology, Utrecht, the Netherlands; <sup>3</sup>Children's Oncology Group, Monrovia, CA, USA; <sup>4</sup>Keck School of Medicine, University of Southern California, Los Angeles, CA, USA; <sup>5</sup>Fred Hutchinson Cancer Research Center, Seattle, WA, USA; <sup>6</sup>IRCCS Ospedale Bambino Gesù, Sapienza, University of Rome, Rome, Italy; <sup>7</sup>AML-BFM Study Group, Pediatric Hematology and Oncology, Essen, Germany; <sup>8</sup>Pediatric Hematology-Immunology Department, University Hospital Robert Debré and Paris Diderot University, Paris, France; <sup>9</sup>Czech Pediatric Hematology/Oncology (CPH), University Hospital Motol and Charles University, Prague, Czech Republic; <sup>10</sup>Dutch Childhood Oncology Group (DCOG), The Hague, the Netherlands and <sup>11</sup>Department of Pediatrics, Seattle Children's Hospital, University of Washington, Seattle, WA, USA.

\*SN and PW contributed equally as co-first authors.

Correspondence: SOHEIL MESHINCHI - smeshinc@fhcrc.org

doi:10.3324/haematol.2019.236745

# Supplemental material

## ***Supplemental material and methods***

### **Patients**

The study comprised COG and European patients. The COG cohort included 2003 de novo patients from COG trials AAML03P1, AAML0531 and AAML1031 <sup>1</sup>. Patients with *FLT3*/ITD high allelic ratio from AAML1031 were excluded due to potentially enrolling onto the Phase I sorafenib treatment arm, which remained under the purview of the COG Data Safety Monitoring Committee and thus, were not analyzed. The European cohort consisted of 343 pediatric AML patients from AIEOP (Associazione Italiana di Ematologia e Oncologia Pediatrica), BFM (Berlin-Frankfurt-Münster), CPH (Czech Pediatric Hematology Working Group), DCOG (Dutch Childhood Oncology Group) and LAME (Leucémie Aiguë Myéloblastique Enfant), previously described by Balgobind *et al* <sup>2</sup>. Patients included in this study were diagnosed between 1995 and 2017. *NUP98-KDM5A* rearrangements, and other rearrangements or mutations, were detected either by paired-end RNA sequencing, whole genome sequencing or RT-PCR, as previously described <sup>3</sup>. Patients with FAB M3 AML were excluded from this study. Flow cytometry-based minimal residual disease (MRD) data was obtained for patients in the COG trials only.

### **Gene expression analysis**

Data of 1035 patients from the COG AAML1031 trial were utilized for gene expression analysis using RNAseq data. Fractional counts were normalized to trimmed mean of m-values and counts per million mapped reads (CPM). The normalized counts were log2 transformed and filtered for genes with at least 1 CPM in 5% of samples. For hierarchical clustering, the

relative level of expression per gene in each sample was determined by mean centering the expression values, using the geometric mean. Pearson correlation coefficients were employed as a measure of dissimilarity with the ward.D2 linkage algorithm was implemented in the R statistical programming environment (R v.3.4.0) <sup>4</sup>. Differential expression analysis was completed using Limma v3.32.5 R package. Genes with absolute log2 fold-change >1 and Benjamini-Hochberg adjusted p-values <0.05 were retained. Principal coordinate analysis (classical multidimensional scaling) was completed with variance stabilized transformed counts. The transformed counts were then used in a linear metric multidimensional scaling with a Bray-Curtis dissimilarity matrix using the Vegan v.2.4-3 R package.

Gene-set enrichment analysis was completed using the GAGE v2.30.0 R package with gene sets from MSigDB (<http://software.broadinstitute.org/gsea/msigdb>) and the KEGG pathway databases. Connectivity mapping was performed using the online webtool from Broad institute, <https://clue.io> <sup>5</sup>. A query was performed using the 90<sup>th</sup> percentile absolute log fold change of the differentially expressed genes in either *NUP98-KDM5A* or *NUP98-NSD1* rearranged AML.

### **Cell line and primary material**

The AMKL cell line, CHRF-288-11, carrying the *NUP98-KDM5A* translocation, was a kind gift from Dr. Gruber's lab, St. Jude Children's Hospital (Memphis, TN, USA) (suppl. figure 1). Cells were maintained in RPMI-1640 medium, supplemented with 10% fetal calf serum, 100 IU/ml Penicillin Streptomycin, and 0.125 µg/ml Amphotericin B (Life Technologies) at 37°C under 5% CO<sub>2</sub> atmosphere. The identity of the cell line was routinely verified by DNA fingerprinting.

Viable cells from primary AML patients were used for drug screening and validation, and were processed and cultured as described previously <sup>6</sup>. Viable cells of historic patients with

*NUP98-KDM5A* or *NUP98-NSD1* AML were obtained from the DCOG cell-bank. All leukemic samples used for drug testing contained >80% blasts, as validated by May-Grunwald-Giemsa (Merck, Darmstadt, Germany) stained cytopins.

### **Drug library screening and validation**

Primary AML cells and the CHRF-288-11 cell line were screened on the following commercially available drug libraries: Prestwick Chemical library (Prestwick Chemical, France), anti-neoplastic sequoia (Sequoia Research Products, United Kingdom), Epigenetics library (Enzo Life Sciences, Belgium), Epigenetics screening library (Cayman Chemical, MI, USA), Spectrum collection (Microsource, CT, USA) and the Cell cycle/DNA Damage compound library (MedChem Express) (suppl. table 1).

Primary AML cells and the CHRF-288-11 cell line were seeded semi-automatically in 384-well plates (Corning) using the Multidrop (Thermo Fisher Scientific). Drugs dissolved in DMSO were added to the 384-well plates using the Caliper SciClone ALH3000 liquid handling robot to a final concentration of 10 nM, 100 nM or 1000 nM, respectively.

The drug response on the cell viability was assessed by a 4-day thiazolyl blue tetrazolium bromide (MTT; Sigma) assay as described elsewhere <sup>7</sup>. MTT data was normalized to DMSO controls. The maximum DMSO limit was <0.5% to minimize toxicity induced by DMSO. The value of optical density for the controls were at least 0.07 to ensure the viability of the primary cells were in good condition when assessing the effect of the drug.

Validation of drug candidates was performed by automatically dispensing drugs to the cells using the Hewlett-Packard D300 Digital Dispenser (Tecan, Männedorf, Switzerland) followed by a 4-day MTT assay.

### **Statistical analysis clinical data**

Complete remission (CR) was defined as less than 5% blasts in the bone marrow, with regeneration of trilineage hematopoiesis and absence of leukemia cells in cerebrospinal fluid or elsewhere. If a patient did not obtain CR, treatment was considered a failure at day 0. Event-free survival (EFS), overall survival (OS) were estimated using the Kaplan-Meier method <sup>8</sup>. OS was calculated from the day of study entry until death. EFS was calculated from the day of study entry to relapse (either death or relapse, whichever occurred first). RR was defined as time to relapse from CR where competing events were defined as deaths without a relapse. TRM was defined as time to death without a relapse for patients in CR where competing events were relapses. Otherwise, patients without an event were censored at the date of last contact for all analyses.

Relapse risk (RR) and treatment-related mortality (TRM) were estimated by the method of competing risks <sup>9</sup>. Estimates of OS, EFS, RR and TRM were reported with their corresponding two standard errors (SE). Twelve patients from the European cohort had no survival data and were excluded from survival analyses.

For comparisons of clinical characteristics between *NUP98-KDM5A* positive and negative patients, Pearson's  $\chi$ -square test was used. Fisher's exact test was used when data were sparse. The Cox proportional-hazard model was used for multivariable analyses of OS and EFS <sup>10</sup>; whereas, a competing risk regression model was used for multivariable analyses of RR <sup>11</sup>. For

these analyses, age, white blood cell count (WBC), cytogenetic risk group, study group (COG vs European cohort), and allogeneic HSCT in CR as a time dependent variable were used as covariates. For some patients on AAML1031, the date HSCT was received in follow-up was not collected; therefore, the midpoint of the follow-up period when HSCT occurred was used to calculate time to HSCT in CR. Two cytogenetic risk groups were defined: standard risk (SR), patients with t(8;21) or inv(16)/t(16;16) rearranged AML, and high risk (HR), patients with other cytogenetic aberrations. All tests were two-tailed and a P-value of less than .05 was considered significant.

## Supplemental figures

Supplemental figure 1. Age and FAB-type distribution of pediatric AML with and without *NUP98-KDM5A* rearrangements.

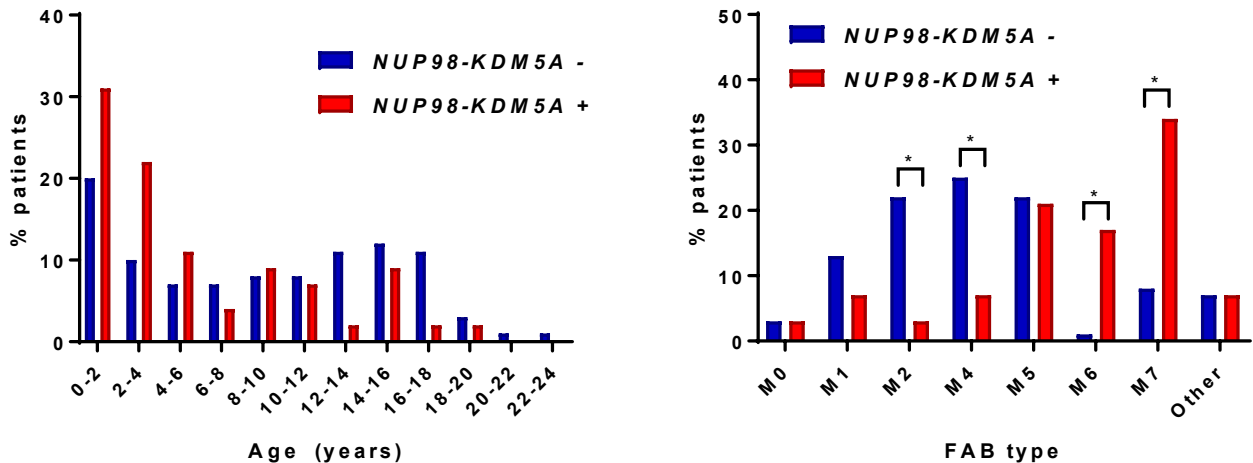

A. Age distribution of *NUP98-KDM5A*+ versus *NUP98-KDM5A*- patients, showing a higher frequency of *NUP98-KDM5A*+ AML in younger patients. B. FAB-type distribution of *NUP98-KDM5A*+ versus *NUP98-KDM5A*- patients. \*P<0.05

Supplemental figure 2. Survival of *NUP98-KDM5A*+ and *NUP98-KDM5A*- AML stratified by MRD status

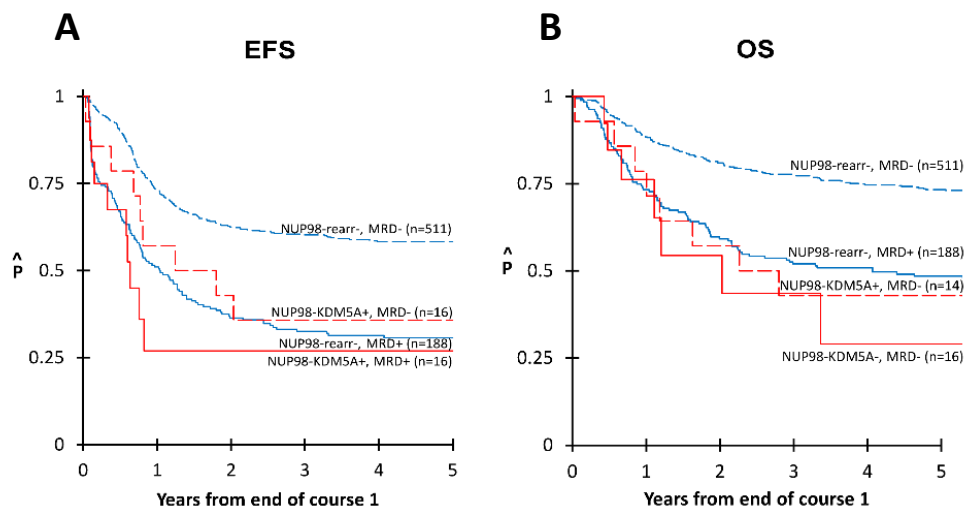

A: EFS of *NUP98-KDM5A* positive and *NUP98-rearrangement* negative patients, stratified by MRD status after the first course of treatment. B: OS *NUP98-KDM5A* positive and *NUP98-rearrangement* negative patients, stratified by MRD status after the first course of treatment.

Supplemental figure 3. Connectivity mapping of *NUP98-KDM5A* (A) and *NUP98-NSD1* (B).

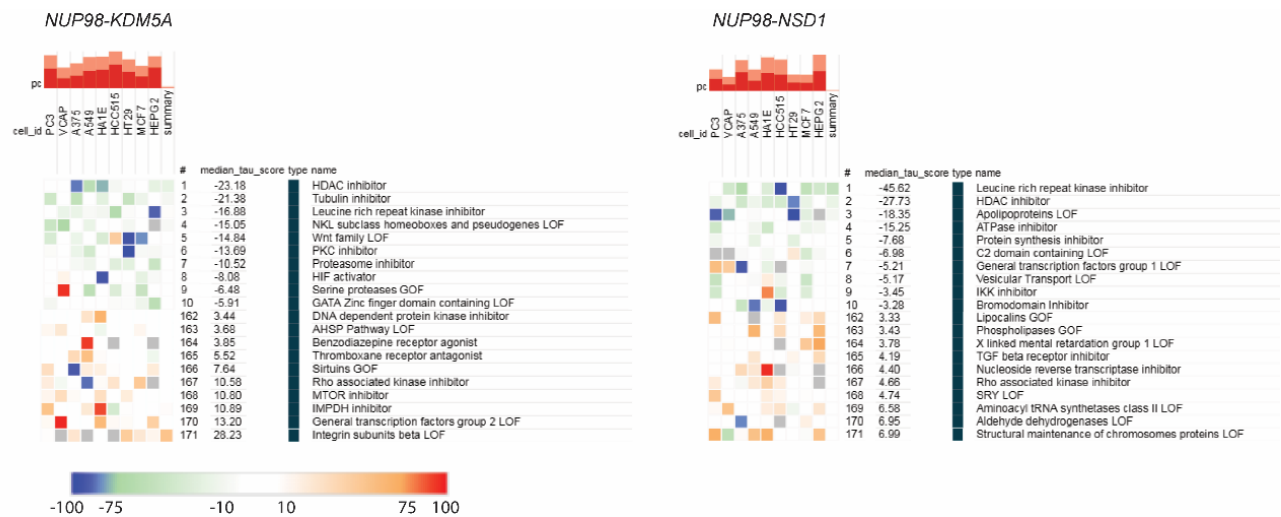

Top 10 highest and lowest median tau score for each *NUP98*-rearrangement for the perturbational classes. A low, negative, score predicts that adding of a member of the perturbational class would oppose the gene expression, whereas a high, positive score predicts that it would further enhance the gene expression.

**Supplemental figure 4. Cell viability of all drugs screened on a NUP98-KDM5A<sup>+</sup> AML and a NUP98-NSD1<sup>+</sup> AML patient sample.**

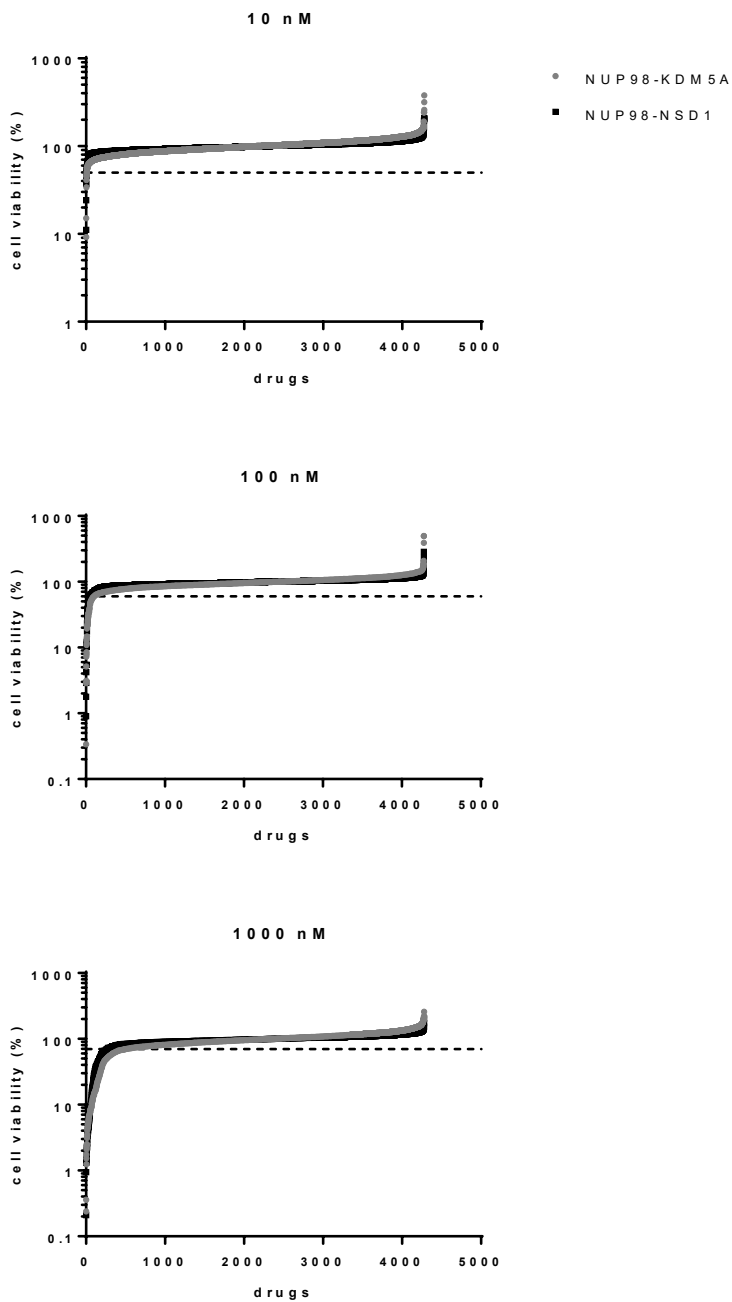

All drugs below the dotted line, representing the cut-off value, are defined as drug hits.

**Supplemental figure 5. NUP98-KDM5A present in CHRF-288-11 while not in SEM.**

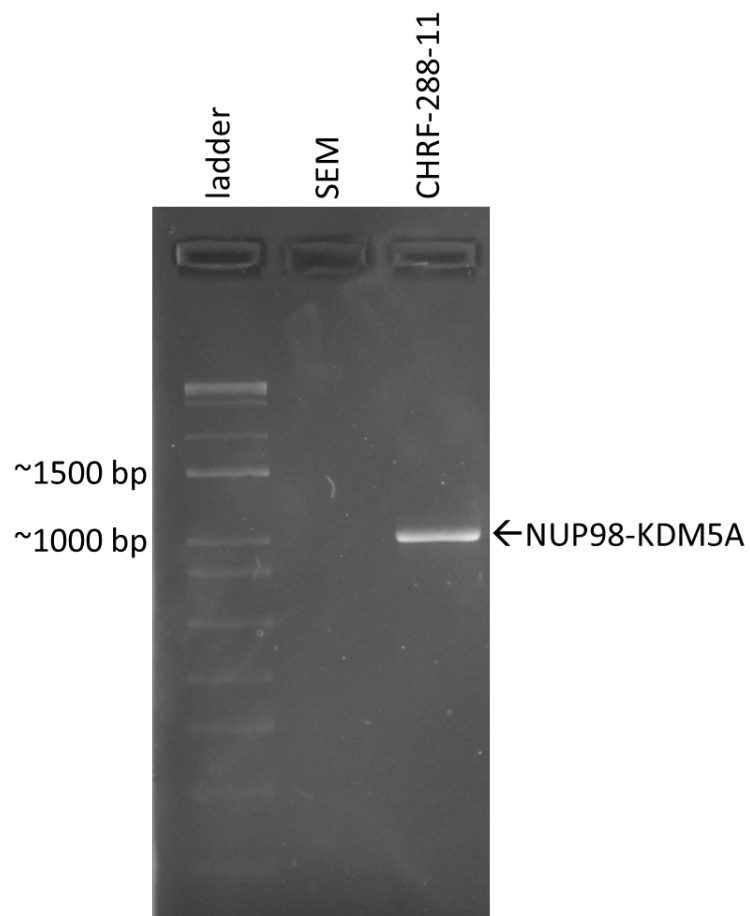

Gel electrophoresis of the PCR product after amplifying of the *NUP98-KDM5A* fusion in the CHRF-288-11 and SEM cell line. The SEM cell line, harboring a t(4;11), was used as negative control.

## Supplemental figure 6. Validation of drug candidates on the CHRF-288-11 cell line.

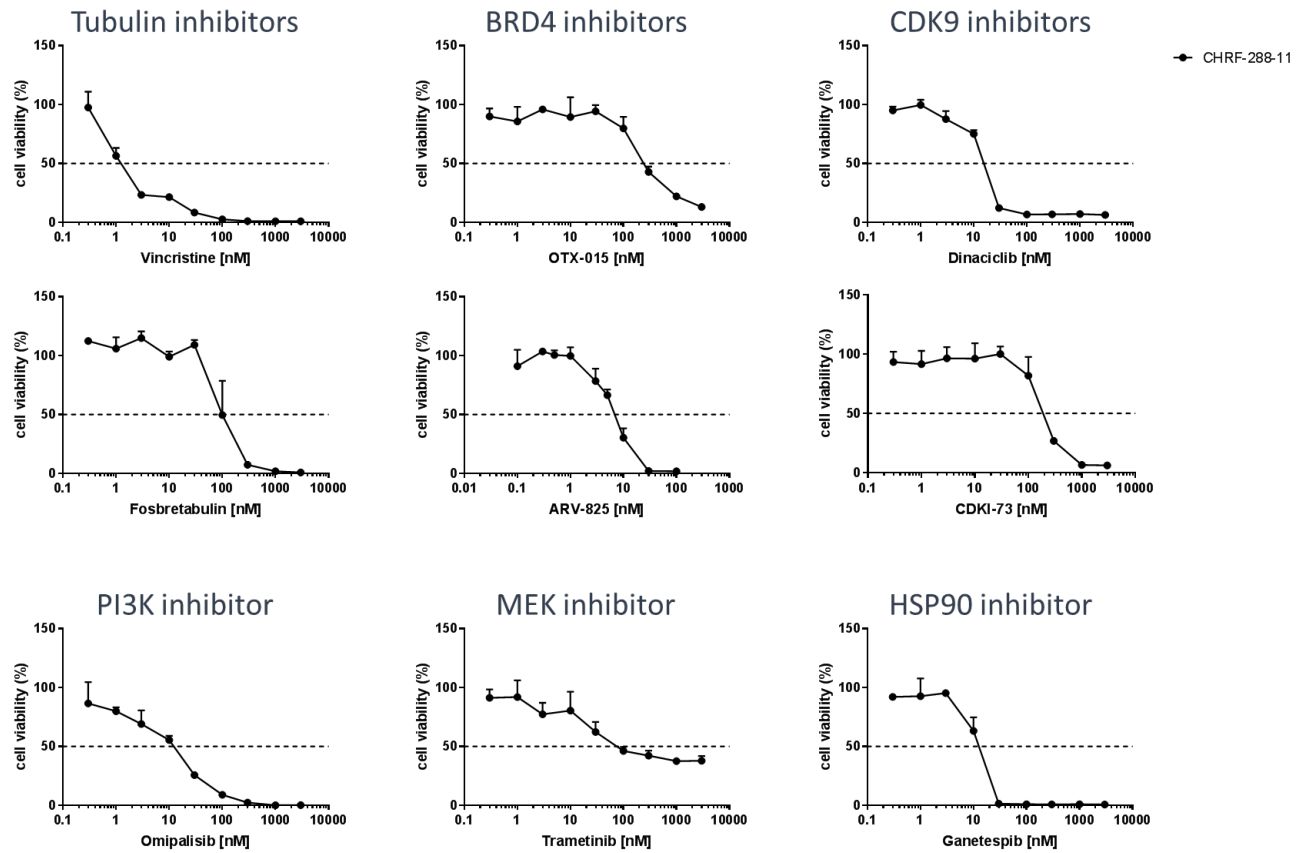

Dose-response curves of the selected candidate drugs after 96 hour exposure of the CHRF-288-11 cell line to tubulin inhibitors vincristine (top) and fosbretabulin (bottom) (A), PI3K inhibitor Omipalisib (B), MEK inhibitor trametinib (C), BRD4 inhibitors OTX-015 (top) and ARV825 (bottom) (D) CDK9 inhibitors dinaciclib (top) and CDKI-73 (bottom) (E) and HSP90 inhibitor ganetespib (F).

Supplemental figure 7. Cell viability results of microtubule inhibitors present in drug screen.

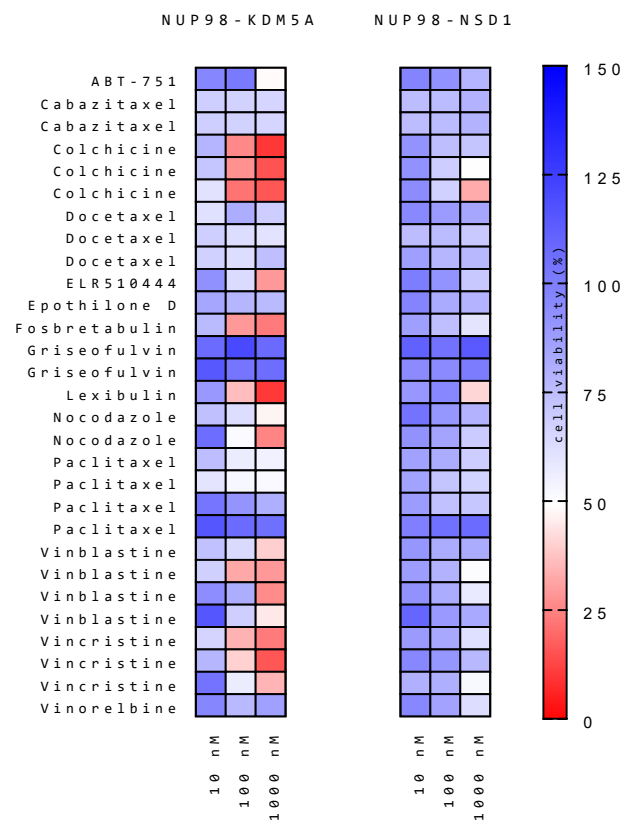

Heatmaps representing the cell viability of a *NUP98-KDM5A*<sup>+</sup> and a *NUP98-NSD1*<sup>+</sup> primary AML sample after 96 hours exposure to all microtubule inhibitors present in the drug library screens.

## ***Supplemental tables***

**Supplemental table 1. Genetic aberrations in *NUP98-KDM5A* + and *NUP98-KDM5A* - patients.**

| Genetic aberration                  | NUP98-KDM5A+ | NUP98-KDM5A-  | P-value |
|-------------------------------------|--------------|---------------|---------|
| Cytogenetic group, N (%)            | 44 (93)      | 2283 (97)     |         |
| t(8;21)                             | 0 (0)        | 314 (14)      | 0.008   |
| inv(16)                             | 0 (0)        | 269 (12)      | 0.016   |
| KMT2A – 11q23                       | 0 (0)        | 542 (24)      | <0.001  |
| t(6;9)                              | 0 (0)        | 36 (2)        | 1       |
| Cryptic rearrangements, N (%)*      | 29           | 1317          |         |
| CBFA2T3-GLIS2                       | 0 (0)        | 30 (2)        | 1       |
| Mutations, N/total cases tested (%) |              |               |         |
| FLT3/ITD**                          | 1/45 (2)     | 276/2318 (12) | 0.046   |
| FLT3 point mutation*                | 1/29 (3)     | 75/1395 (5)   | 1       |
| CEBPA*                              | 1/47 (4)     | 137/2325 (6)  | 0.521   |
| NPM1*                               | 1/47 (2)     | 177/2326 (8)  | 0.257   |
| TET2*                               | 0/25 (0)     | 29/1237 (2)   | 1       |
| ASXL1*                              | 0/21 (0)     | 19/1062 (1)   | 1       |
| CKIT*                               | 0/9 (0)      | 83/575 (14)   | 0.372   |
| WT1*                                | 3/29 (10)    | 91/1401 (6)   | 0.433   |

\*Data unavailable from AAML1031; \*\*Patients with high FLT3/ITD allelic ratio were excluded from the AAML1031 cohort

**Supplemental table 2. Multivariable analyses of survival parameters of *NUP98-KDM5A* rearranged AML.**

|                                  | EFS          |           |                  | OS           |           |                  | RR           |           |                  |
|----------------------------------|--------------|-----------|------------------|--------------|-----------|------------------|--------------|-----------|------------------|
|                                  | Hazard ratio | 95% CI    | p-value          | Hazard ratio | 95% CI    | p-value          | Hazard ratio | 95% CI    | p-value          |
| <b>HR cytogenetics**</b>         | 2.29         | 1.96-2.67 | <b>&lt;0.001</b> | 3.08         | 2.46-3.84 | <b>&lt;0.001</b> | 2.02         | 1.71-2.40 | <b>&lt;0.001</b> |
| <b><i>NUP98-KDM5A</i> +</b>      | 1.40         | 0.95-2.07 | 0.093            | 1.77         | 1.16-2.71 | <b>0.009</b>     | 1.62         | 1.01-2.60 | <b>0.049</b>     |
| <b>WBC &gt;10*10<sup>9</sup></b> | 1.45         | 1.25-1.66 | <b>&lt;0.001</b> | 1.17         | 0.99-1.39 | 0.074            | 1.37         | 1.15-1.63 | <b>&lt;0.001</b> |
| <b>Age &gt;10 years</b>          | 0.99         | 0.88-1.11 | 0.804            | 1.08         | 0.94-1.25 | 0.283            | 0.89         | 0.77-1.02 | 0.092            |
| <b>European study group</b>      | 1.05         | 0.89-1.24 | 0.598            | 1.09         | 0.89-1.34 | 0.391            | 1.11         | 0.91-1.37 | 0.309            |
| <b>HSCT in CR1</b>               | 0.53         | 0.44-0.63 | <b>&lt;0.001</b> | 0.94         | 0.77-1.15 | 0.553            | 0.54         | 0.44-0.67 | <b>&lt;0.001</b> |

\*\*HR=cytogenetic subgroups other than t(8;21) and inv(16)

CI confidence interval; HR, cytogenetic high-risk group; WBC, white blood cell count; HSCT, hematopoietic stem cell transplantation; CR1, first complete remission



| gene              | logFC       | AveExpr      | t           | P.Value     | adj.P.Val   | B           | FoldChange  |
|-------------------|-------------|--------------|-------------|-------------|-------------|-------------|-------------|
| GABRE             | 4.766337048 | -2.50400211  | 5.608384603 | 2.65E-08    | 1.28E-06    | 8.578640471 | 27.21513048 |
| CDC42BPA          | 4.760427987 | 1.531793283  | 6.921070514 | 8.08E-12    | 1.08E-09    | 16.36110986 | 27.10388939 |
| CRYM              | 4.73617544  | -2.902523681 | 8.445146282 | 1.08E-16    | 4.04E-14    | 27.22730638 | 26.65206552 |
| GAD1              | 4.705363093 | -0.256318842 | 6.320064457 | 3.96E-10    | 3.26E-08    | 12.61145543 | 26.08887978 |
| MYCT1             | 4.704860783 | -1.698146708 | 6.257181002 | 5.84E-10    | 4.64E-08    | 12.23717861 | 26.07979786 |
| EMX2              | 4.701546498 | -4.345703506 | 9.108677186 | 4.56E-19    | 2.20E-16    | 32.54045458 | 26.01995384 |
| HLF               | 4.681482468 | -1.654032161 | 8.554201681 | 4.51E-17    | 1.75E-14    | 28.07695736 | 25.66059056 |
| AL589743.1        | 4.669757225 | -3.161671545 | 6.196890576 | 8.46E-10    | 6.44E-08    | 11.88157687 | 25.45288394 |
| CXADR             | 4.642084843 | -1.610336166 | 7.116257999 | 2.14E-12    | 3.20E-10    | 17.64529085 | 24.96932374 |
| IRX5              | 4.624487248 | -0.921095932 | 6.28880087  | 4.81E-10    | 3.93E-08    | 12.4249463  | 24.66660483 |
| IRX1              | 4.618119874 | -2.286200153 | 4.639819441 | 3.96E-06    | 9.45E-05    | 3.819504892 | 24.55797798 |
| RP11-178A10.1     | 4.604904171 | -5.021534076 | 9.533565048 | 1.15E-20    | 8.14E-18    | 36.12000036 | 24.33404365 |
| ALDH1A1           | 4.560719199 | 0.589498661  | 6.531175303 | 1.05E-10    | 1.02E-08    | 13.89310856 | 23.60006944 |
| RP11-366L20.2     | 4.55967061  | -0.443503176 | 6.767441088 | 2.25E-11    | 2.60E-09    | 15.37310745 | 23.58292252 |
| DPY19L2P1         | 4.530229163 | -3.266919714 | 7.469010295 | 1.78E-13    | 3.46E-11    | 20.0473869  | 23.10653716 |
| HOXA9             | 4.505501094 | 2.653276698  | 3.777284009 | 0.000168078 | 0.002066972 | 0.308226961 | 22.71386158 |
| AP000525.8        | 4.491579112 | -3.384011814 | 6.399248813 | 2.41E-10    | 2.13E-08    | 13.08765149 | 22.4957274  |
| KLHL4             | 4.485786352 | -3.765547394 | 7.220122608 | 1.04E-12    | 1.66E-10    | 18.34174506 | 22.40558285 |
| RNF150            | 4.430138387 | -2.351368439 | 6.653178205 | 4.76E-11    | 5.08E-09    | 14.65135913 | 21.55780501 |
| RP11-129J12.2     | 4.420333633 | -3.278987033 | 5.51749084  | 4.40E-08    | 1.99E-06    | 8.095948458 | 21.41179193 |
| FAT4              | 4.385920985 | -1.165283953 | 7.045426481 | 3.48E-12    | 4.98E-10    | 17.17554875 | 20.90709897 |
| AJ006998.2        | 4.385712548 | -3.444728702 | 7.175042012 | 1.42E-12    | 2.18E-10    | 18.03834737 | 20.90407858 |
| CALD1             | 4.378868537 | -1.230404095 | 6.128845978 | 1.28E-09    | 9.31E-08    | 11.48406099 | 20.80514642 |
| KBTBD12           | 4.366008434 | -3.478502339 | 6.978464147 | 5.48E-12    | 7.59E-10    | 16.7353664  | 20.62051463 |
| HOXA3             | 4.35656712  | 1.764118488  | 3.985381179 | 7.24E-05    | 0.001062112 | 1.091742972 | 20.48601004 |
| HOXB-AS3          | 4.339564706 | -2.553869578 | 5.020538546 | 6.12E-07    | 1.88E-05    | 5.588453945 | 20.24599591 |
| HOXA5             | 4.308065425 | 1.776612798  | 3.876098227 | 0.000113194 | 0.001521589 | 0.675199634 | 19.80874294 |
| NFIB              | 4.287931409 | -2.598782805 | 6.480873774 | 1.44E-10    | 1.37E-08    | 13.58422283 | 19.53421545 |
| MSX1              | 4.272923519 | -3.401751901 | 7.671010276 | 4.10E-14    | 9.12E-12    | 21.4695114  | 19.33206062 |
| GLB1L2            | 4.263952405 | -1.237155133 | 7.998158217 | 3.54E-15    | 9.59E-13    | 23.84370213 | 19.21222101 |
| BMP6P1            | 4.250844595 | -4.070198745 | 6.775574042 | 2.13E-11    | 2.50E-09    | 15.42490612 | 19.03845623 |
| STAC              | 4.249415156 | -2.864849571 | 5.963281358 | 3.45E-09    | 2.18E-07    | 10.53382096 | 19.01960206 |
| SULT4A1           | 4.230660201 | -3.893446475 | 6.531893742 | 1.04E-10    | 1.02E-08    | 13.89753611 | 18.77394849 |
| SLC27A6           | 4.227999289 | -1.927374977 | 5.693429918 | 1.64E-08    | 8.45E-07    | 9.036962739 | 18.73935366 |
| GRTP1             | 4.211741972 | -2.421004716 | 6.830105054 | 1.49E-11    | 1.85E-09    | 15.77367344 | 18.52937059 |
| RP11-146I2.1      | 4.192389284 | -3.305576383 | 6.828954511 | 1.50E-11    | 1.85E-09    | 15.76628862 | 18.28247246 |
| LL22NC03-30E12.13 | 4.192202702 | -3.835876124 | 7.190543431 | 1.28E-12    | 1.97E-10    | 18.14248118 | 18.28010817 |
| CTD-2643I7.1      | 4.158388854 | -2.812499369 | 6.221471521 | 7.28E-10    | 5.67E-08    | 12.02617523 | 17.85664147 |
| RP1-170O19.20     | 4.15013314  | 0.917196211  | 3.77205517  | 0.000171589 | 0.002103609 | 0.289064502 | 17.75474999 |
| RP11-211A18.1     | 4.139727126 | -4.099946003 | 8.011306331 | 3.20E-15    | 8.92E-13    | 23.94094039 | 17.62714751 |
| PIEZO2            | 4.120609826 | 0.30827242   | 4.617930477 | 4.39E-06    | 0.000102938 | 3.721848663 | 17.39510914 |
| HOXB2             | 4.097632767 | 1.093735273  | 5.365061955 | 1.01E-07    | 4.07E-06    | 7.303115031 | 17.12026072 |
| RHAG              | 4.096382482 | 3.273094944  | 5.281044161 | 1.58E-07    | 6.03E-06    | 6.875056518 | 17.10543018 |
| RP11-438N16.1     | 4.044879696 | -2.495999535 | 8.418677093 | 1.34E-16    | 4.82E-14    | 27.02250178 | 16.50555444 |
| MYO3B             | 4.042242802 | -3.132732836 | 7.352225999 | 4.10E-13    | 6.94E-11    | 19.24062234 | 16.47541388 |
| CTNNA3            | 4.028447857 | -3.09942345  | 5.998276112 | 2.80E-09    | 1.82E-07    | 10.73265777 | 16.31862795 |
| HEY2              | 4.026436055 | -3.80639022  | 7.520191575 | 1.23E-13    | 2.49E-11    | 20.40452489 | 16.29588789 |
| RP11-112J1.2      | 3.997162502 | -3.335261356 | 6.879359337 | 1.07E-11    | 1.38E-09    | 16.09087289 | 15.96856207 |
| HOXA-AS4          | 3.986384356 | -0.822235388 | 4.361918188 | 1.43E-05    | 0.000276405 | 2.61254696  | 15.84970799 |
| FAM83A            | 3.981419528 | 0.035517228  | 5.637892383 | 2.25E-08    | 1.11E-06    | 8.736930894 | 15.79525724 |
| HRC               | 3.968801577 | -3.999456591 | 6.004353219 | 2.70E-09    | 1.77E-07    | 10.76729737 | 15.65771276 |
| PCDH9             | 3.951222667 | 0.615316186  | 6.330252794 | 3.72E-10    | 3.09E-08    | 12.67241993 | 15.46808473 |
| HS3ST4            | 3.943677981 | -3.101931518 | 4.705264458 | 2.90E-06    | 7.25E-05    | 4.114116688 | 15.38740433 |
| SAGE1             | 3.935941208 | -2.574463445 | 3.791962793 | 0.00015858  | 0.001978456 | 0.362158948 | 15.30510681 |
| TSPAN6            | 3.931378706 | -2.376478019 | 6.88332576  | 1.04E-11    | 1.36E-09    | 16.11650672 | 15.25678109 |
| FGF2              | 3.923713652 | -3.288924219 | 6.742014583 | 2.66E-11    | 3.06E-09    | 15.21153145 | 15.17593661 |
| CNNM1             | 3.91984283  | -2.247894654 | 5.666689704 | 1.91E-08    | 9.63E-07    | 8.892159889 | 15.13527339 |
| PTRF              | 3.912617247 | 1.633304767  | 5.454430717 | 6.22E-08    | 2.67E-06    | 7.765418769 | 15.05965952 |
| TMEM72            | 3.909985469 | -3.642918106 | 6.093016707 | 1.59E-09    | 1.12E-07    | 11.27637865 | 15.03221258 |
| NUP62CL           | 3.907791621 | -1.714531808 | 6.274268634 | 5.26E-10    | 4.25E-08    | 12.33854145 | 15.00937108 |

| gene              | logFC       | AveExpr      | t           | P.Value     | adj.P.Val   | B            | FoldChange  |
|-------------------|-------------|--------------|-------------|-------------|-------------|--------------|-------------|
| CPS1              | 3.904512432 | -2.853495174 | 7.497342025 | 1.45E-13    | 2.90E-11    | 20.24481475  | 14.97529411 |
| PARK2             | 3.880978366 | -1.640693841 | 6.958761687 | 6.27E-12    | 8.43E-10    | 16.60657403  | 14.73299022 |
| CYP3A5            | 3.865788837 | -3.835439635 | 7.41759306  | 2.58E-13    | 4.62E-11    | 19.6907907   | 14.5786865  |
| LRRC7             | 3.860947982 | -2.941376197 | 6.572218211 | 8.03E-11    | 8.07E-09    | 14.14675926  | 14.52985079 |
| EDIL3             | 3.855808909 | -1.655731357 | 4.572947022 | 5.42E-06    | 0.000123428 | 3.522545324  | 14.47818558 |
| FAM18A            | 3.837787157 | -3.259991879 | 8.362772369 | 2.08E-16    | 6.98E-14    | 26.59176556  | 14.29845297 |
| HOXA2             | 3.83387685  | -1.536193931 | 4.406005662 | 1.17E-05    | 0.000236207 | 2.799250618  | 14.25975065 |
| HPSE2             | 3.829665767 | -4.061317737 | 5.42846551  | 7.16E-08    | 3.02E-06    | 7.630360328  | 14.21818855 |
| AL132709.8        | 3.818351415 | -4.208814724 | 6.659221972 | 4.57E-11    | 4.92E-09    | 14.68925435  | 14.10711835 |
| HOXA10            | 3.795528086 | 2.340747878  | 3.434565998 | 0.000618318 | 0.005795667 | -0.893095837 | 13.8857008  |
| RP1-163G9.1       | 3.794674455 | -2.906160763 | 4.298045169 | 1.89E-05    | 0.000352354 | 2.345257745  | 13.87748718 |
| ATP8A2            | 3.783375462 | -1.761198755 | 6.802652485 | 1.78E-11    | 2.13E-09    | 15.59777589  | 13.76922507 |
| PRAME             | 3.78238231  | 1.708579546  | 3.506487541 | 0.000474598 | 0.004683721 | -0.650212483 | 13.75974959 |
| NEO1              | 3.762334021 | 1.924474561  | 5.552017122 | 3.63E-08    | 1.67E-06    | 8.278429181  | 13.56986084 |
| SKIDA1            | 3.761121193 | 1.825595855  | 4.233977778 | 2.51E-05    | 0.000443286 | 2.080968497  | 13.55845788 |
| CTA-109P11.4      | 3.760189015 | -3.455474975 | 6.453078781 | 1.72E-10    | 1.58E-08    | 13.41448161  | 13.5497001  |
| ZNF711            | 3.758045132 | 1.500496202  | 4.77474478  | 2.07E-06    | 5.47E-05    | 4.431206179  | 13.52957984 |
| XIRP2             | 3.749674606 | -2.980631515 | 5.773498437 | 1.04E-08    | 5.64E-07    | 9.474356406  | 13.45130841 |
| TBX2              | 3.72922528  | -2.565965019 | 7.462281229 | 1.87E-13    | 3.59E-11    | 20.00059366  | 13.2619892  |
| MAP2              | 3.729002408 | -3.008938451 | 7.46940104  | 1.78E-13    | 3.46E-11    | 20.05010526  | 13.2599406  |
| RPS3AP39          | 3.717138176 | -3.680317226 | 7.69920473  | 3.33E-14    | 7.49E-12    | 21.67068092  | 13.15134252 |
| HBG2              | 3.710744144 | 5.444776915  | 4.564796271 | 5.63E-06    | 0.000127389 | 3.486632571  | 13.09318468 |
| HOOK1             | 3.704234406 | 0.539864492  | 8.247980267 | 5.14E-16    | 1.56E-13    | 25.71510379  | 13.03423862 |
| MYO16             | 3.697753454 | -2.6856529   | 5.257504129 | 1.79E-07    | 6.70E-06    | 6.756266907  | 12.97581683 |
| AL132709.5        | 3.684777899 | -4.204729639 | 6.522508881 | 1.10E-10    | 1.06E-08    | 13.83973487  | 12.85963598 |
| ZNF300            | 3.678613255 | -0.945330338 | 6.818972182 | 1.60E-11    | 1.95E-09    | 15.70226395  | 12.80480391 |
| ST6GALNAC1        | 3.67002542  | -0.816176668 | 5.793196421 | 9.29E-09    | 5.15E-07    | 9.582835374  | 12.72880801 |
| CNTN4             | 3.654299928 | -3.365855011 | 4.279691058 | 2.05E-05    | 0.000376504 | 2.269153192  | 12.59081641 |
| NAP1L3            | 3.648130135 | -2.503510435 | 6.41959137  | 2.12E-10    | 1.89E-08    | 13.21086644  | 12.53708582 |
| ITLN1             | 3.634196001 | -2.227366574 | 5.697694417 | 1.60E-08    | 8.27E-07    | 9.060114673  | 12.41658044 |
| A2ML1             | 3.632402588 | -3.715476757 | 7.429985313 | 2.36E-13    | 4.36E-11    | 19.77653435  | 12.40115499 |
| LL22NC03-30E12.10 | 3.6314989   | -4.258182409 | 6.802381649 | 1.79E-11    | 2.13E-09    | 15.59604376  | 12.39338947 |
| SLC22A10          | 3.602516064 | -4.391764087 | 6.975079573 | 5.61E-12    | 7.71E-10    | 16.71321847  | 12.14689829 |
| CFH               | 3.594731107 | 0.169935624  | 5.148343585 | 3.17E-07    | 1.09E-05    | 6.211969417  | 12.08152869 |
| VWDE              | 3.577681718 | -1.847919729 | 5.121852185 | 3.64E-07    | 1.21E-05    | 6.081507209  | 11.93959271 |
| ESRRG             | 3.56569605  | -4.526541515 | 7.072000829 | 2.90E-12    | 4.19E-10    | 17.35128869  | 11.84081148 |
| ACTN2             | 3.565497454 | -3.455936474 | 6.356930775 | 3.15E-10    | 2.65E-08    | 12.83248243  | 11.83918162 |
| HEPACAM2          | 3.564845573 | -1.092563384 | 5.252615983 | 1.84E-07    | 6.85E-06    | 6.731662784  | 11.8338333  |
| HBBP1             | 3.556006419 | -2.256056697 | 5.362044651 | 1.03E-07    | 4.13E-06    | 7.287632055  | 11.76155102 |
| IL1RAPL1          | 3.546051924 | -4.942303161 | 7.419526065 | 2.54E-13    | 4.61E-11    | 19.70415701  | 11.68067648 |
| RGS9BP            | 3.541171548 | -1.493757174 | 7.393804755 | 3.05E-13    | 5.34E-11    | 19.52655415  | 11.64122962 |
| TRPM4             | 3.536781334 | 0.954693257  | 3.726136364 | 0.000205527 | 0.00242792  | 0.12189035   | 11.60585846 |
| RYR2              | 3.53253237  | -3.848748366 | 5.100205256 | 4.07E-07    | 1.33E-05    | 5.975375865  | 11.57172766 |
| RP13-726E6.2      | 3.532175935 | -2.295064626 | 7.539504391 | 1.07E-13    | 2.21E-11    | 20.53985153  | 11.56886908 |
| PCYT1B            | 3.527138354 | -0.347432191 | 5.864522139 | 6.15E-09    | 3.60E-07    | 9.978515356  | 11.52854352 |
| HOXA7             | 3.523884531 | -0.114952675 | 3.328205081 | 0.000906534 | 0.007823385 | -1.243275246 | 11.50257159 |
| RP11-26F2.1       | 3.508881087 | -2.094380674 | 3.015264972 | 0.00263357  | 0.017563344 | -2.21104709  | 11.38356937 |
| CDH6              | 3.50191414  | -4.198837788 | 6.527796239 | 1.07E-10    | 1.03E-08    | 13.87229028  | 11.32872927 |
| IGSF3             | 3.501277098 | -0.743978773 | 6.206395493 | 7.98E-10    | 6.17E-08    | 11.93742724  | 11.32372802 |
| SYTL4             | 3.501111402 | 0.55871553   | 4.746391015 | 2.38E-06    | 6.10E-05    | 4.30127141   | 11.32242754 |
| SYDE2             | 3.496959914 | -0.568675746 | 5.751148686 | 1.18E-08    | 6.38E-07    | 9.351691512  | 11.28989305 |
| RP11-578F21.10    | 3.492663047 | -2.137863561 | 3.370957979 | 0.000778258 | 0.006971205 | -1.103809978 | 11.25631769 |
| HOXA4             | 3.487366597 | 0.80134501   | 3.720410823 | 0.000210177 | 0.002471042 | 0.101185163  | 11.21506904 |
| IGLVV-58          | 3.486174035 | -4.703681043 | 7.371207962 | 3.59E-13    | 6.17E-11    | 19.37098017  | 11.20580227 |
| ZNF229            | 3.469662543 | -1.351247416 | 5.621306938 | 2.47E-08    | 1.19E-06    | 8.647864811  | 11.07828415 |
| RGS6              | 3.459553165 | -1.081483887 | 6.167544165 | 1.01E-09    | 7.53E-08    | 11.70963793  | 11.00092678 |
| EXOC3L4           | 3.447584805 | -1.892108827 | 5.954721892 | 3.62E-09    | 2.27E-07    | 10.48535139  | 10.91004241 |
| IGSF11            | 3.433780914 | -3.091463734 | 6.970345582 | 5.79E-12    | 7.86E-10    | 16.68225653  | 10.80615154 |
| ZDHHC15           | 3.425834682 | -2.773734596 | 5.298243077 | 1.44E-07    | 5.53E-06    | 6.962163741  | 10.74679586 |
| RP11-446H18.3     | 3.411467653 | -1.034219058 | 5.920618961 | 4.43E-09    | 2.69E-07    | 10.29287974  | 10.64030539 |

| gene           | logFC       | AveExpr      | t           | P.Value     | adj.P.Val   | B            | FoldChange  |
|----------------|-------------|--------------|-------------|-------------|-------------|--------------|-------------|
| PLCB4          | 3.403823141 | -0.636551869 | 4.601433528 | 4.75E-06    | 0.000110199 | 3.648540571  | 10.58407395 |
| PRR15          | 3.399915545 | -3.143328001 | 5.650191784 | 2.10E-08    | 1.05E-06    | 8.803138989  | 10.55544535 |
| SELP           | 3.394963924 | 1.435036438  | 6.006012018 | 2.67E-09    | 1.76E-07    | 10.7767582   | 10.51927903 |
| IGLV4-60       | 3.394113853 | -2.843138829 | 6.029230311 | 2.33E-09    | 1.56E-07    | 10.90943643  | 10.51308265 |
| BCORP1         | 3.393597276 | -2.547905626 | 4.129300715 | 3.95E-05    | 0.000647757 | 1.657391556  | 10.50931896 |
| ANKFN1         | 3.392013263 | -3.148467126 | 5.626288094 | 2.40E-08    | 1.16E-06    | 8.674588471  | 10.49778654 |
| RP11-578F21.12 | 3.376283496 | 0.971383203  | 3.383814884 | 0.000743117 | 0.006729542 | -1.061529074 | 10.38395043 |
| SLC44A4        | 3.373580326 | -1.967515654 | 6.366195633 | 2.97E-10    | 2.55E-08    | 12.88821454  | 10.36451229 |
| MED12L         | 3.363393384 | 4.299341777  | 5.104193021 | 3.99E-07    | 1.31E-05    | 5.994895222  | 10.29158572 |
| EIF1AY         | 3.358874765 | -0.504183783 | 2.875892233 | 0.004115955 | 0.024860319 | -2.611902304 | 10.2594022  |
| OSBPL6         | 3.344227168 | -1.029643595 | 5.236410046 | 2.00E-07    | 7.40E-06    | 6.650246036  | 10.1557661  |
| PDIA2          | 3.340201872 | -2.831968719 | 7.392695427 | 3.08E-13    | 5.34E-11    | 19.51890674  | 10.12746976 |
| C6orf25        | 3.338158553 | 0.984274369  | 5.636500846 | 2.27E-08    | 1.11E-06    | 8.72944871   | 10.11313617 |
| PLSCR4         | 3.337815985 | -1.378591913 | 5.298093591 | 1.44E-07    | 5.53E-06    | 6.961405487  | 10.11073509 |
| COL11A1        | 3.332209655 | -4.177611582 | 5.583788082 | 3.05E-08    | 1.44E-06    | 8.44729062   | 10.07152089 |
| FKBP14         | 3.319939957 | 3.155376707  | 6.441916968 | 1.84E-10    | 1.69E-08    | 13.34650587  | 9.986228771 |
| SETP11         | 3.318791293 | -2.091124756 | 5.097887763 | 4.12E-07    | 1.34E-05    | 5.964038815  | 9.978280967 |
| TTLL7          | 3.313431865 | -1.115106493 | 5.602675727 | 2.74E-08    | 1.31E-06    | 8.54810583   | 9.941281691 |
| GPC5           | 3.302135385 | -3.08047213  | 5.7316549   | 1.32E-08    | 7.00E-07    | 9.245064128  | 9.863744191 |
| CCDC74A        | 3.299873633 | -1.727790204 | 6.183243456 | 9.20E-10    | 6.92E-08    | 11.80152538  | 9.848292647 |
| EGFEM1P        | 3.296119276 | -2.879921491 | 4.622939085 | 4.29E-06    | 0.000100886 | 3.74415527   | 9.822697541 |
| EML6           | 3.283706367 | 0.52346365   | 9.898961927 | 4.37E-22    | 3.46E-19    | 39.30607799  | 9.73854585  |
| PRDM16         | 3.282959332 | -1.073854749 | 3.478793866 | 0.00052578  | 0.005104808 | -0.744316899 | 9.733504486 |
| DTX3           | 3.273063038 | 0.871559294  | 6.836800519 | 1.42E-11    | 1.78E-09    | 15.81667102  | 9.666965134 |
| C2orf88        | 3.262707849 | 1.381246547  | 5.311176833 | 1.35E-07    | 5.23E-06    | 7.027845266  | 9.597827268 |
| HBG1           | 3.25436818  | 4.030705698  | 3.915455049 | 9.65E-05    | 0.001343264 | 0.823919758  | 9.542505945 |
| SLITRK6        | 3.252068014 | -4.845421575 | 6.818626101 | 1.60E-11    | 1.95E-09    | 15.70004579  | 9.527303939 |
| AC138649.1     | 3.2468944   | -3.121506208 | 3.865339143 | 0.000118224 | 0.001573685 | 0.634797078  | 9.49319949  |
| C14orf38       | 3.227746207 | -3.025425198 | 5.215783022 | 2.23E-07    | 8.12E-06    | 6.546962117  | 9.368033318 |
| AC103702.1     | 3.226113386 | -4.32058473  | 5.048120303 | 5.32E-07    | 1.67E-05    | 5.721757984  | 9.357436712 |
| TEK            | 3.207434106 | -1.581174052 | 5.714098159 | 1.46E-08    | 7.63E-07    | 9.149321521  | 9.237062349 |
| RP11-844P9.2   | 3.205374641 | -2.335188157 | 4.788999154 | 1.93E-06    | 5.14E-05    | 4.496807525  | 9.223885735 |
| RP11-13K12.1   | 3.185288662 | -0.252303098 | 3.877982973 | 0.000112335 | 0.001515176 | 0.682288447  | 9.096355648 |
| EPB41L4A       | 3.157934204 | -0.510810148 | 6.686552916 | 3.83E-11    | 4.30E-09    | 14.86101474  | 8.925507512 |
| IFI27          | 3.153840873 | 1.176266645  | 4.837768449 | 1.52E-06    | 4.22E-05    | 4.722663012  | 8.900219228 |
| ARHGAP6        | 3.15198869  | -0.984264166 | 4.497118608 | 7.71E-06    | 0.000165461 | 3.190811726  | 8.888800145 |
| MAGI1          | 3.140201334 | -2.850093908 | 4.935050085 | 9.41E-07    | 2.77E-05    | 5.179691006  | 8.816471217 |
| CCDC68         | 3.131252218 | -2.069623869 | 5.536438719 | 3.96E-08    | 1.82E-06    | 8.195960846  | 8.761951434 |
| RBFOX2         | 3.122788379 | 0.930063885  | 4.979091768 | 7.54E-07    | 2.28E-05    | 5.389443396  | 8.710698302 |
| HIF3A          | 3.121802954 | -3.86418335  | 4.101126879 | 4.45E-05    | 0.000717309 | 1.545133622  | 8.704750541 |
| DNAJC6         | 3.111758279 | 2.647074005  | 5.570592585 | 3.28E-08    | 1.54E-06    | 8.377047347  | 8.644354749 |
| MYO18B         | 3.105649085 | 1.40618047   | 2.971171494 | 0.003038918 | 0.019650676 | -2.339880286 | 8.607827013 |
| CLCN4          | 3.102869786 | 1.015674406  | 5.819041426 | 8.01E-09    | 4.51E-07    | 9.72568934   | 8.591260311 |
| PROS1          | 3.10019091  | -0.302140188 | 4.982183095 | 7.43E-07    | 2.24E-05    | 5.404232619  | 8.575322389 |
| MAOA           | 3.097635034 | -0.819629776 | 5.628198747 | 2.38E-08    | 1.15E-06    | 8.684844915  | 8.560143812 |
| LCA5           | 3.095331356 | 0.231460635  | 5.948528978 | 3.76E-09    | 2.34E-07    | 10.45032319  | 8.546485982 |
| MME            | 3.089891525 | 0.533634022  | 4.375750429 | 1.34E-05    | 0.000262956 | 2.670930109  | 8.514321249 |
| ZNF883         | 3.088530274 | -3.531266544 | 5.848249183 | 6.76E-09    | 3.90E-07    | 9.887843757  | 8.506291376 |
| NID2           | 3.079679107 | -0.805137675 | 5.734904614 | 1.30E-08    | 6.91E-07    | 9.262815972  | 8.454263669 |
| NCR2           | 3.078499945 | -4.127825109 | 5.130336364 | 3.48E-07    | 1.18E-05    | 6.123219879  | 8.447356543 |
| GLRB           | 3.067240898 | -3.701889171 | 5.199258781 | 2.43E-07    | 8.73E-06    | 6.46449971   | 8.381688458 |
| SDPR           | 3.060222186 | 1.719999824  | 4.577677109 | 5.30E-06    | 0.000120915 | 3.543414531  | 8.341010568 |
| AP001189.4     | 3.056540356 | -3.154717098 | 5.464351731 | 5.89E-08    | 2.54E-06    | 7.817183084  | 8.319751028 |
| SFRP5          | 3.056398796 | -2.904602119 | 4.738263314 | 2.47E-06    | 6.33E-05    | 4.264161378  | 8.318934719 |
| IL7            | 3.049998872 | -2.297830865 | 5.570348349 | 3.28E-08    | 1.54E-06    | 8.375748679  | 8.282112914 |
| RP11-313J2.1   | 3.044980777 | -4.09312383  | 5.956546491 | 3.59E-09    | 2.26E-07    | 10.49567809  | 8.253355465 |
| GDF15          | 3.043307888 | -0.470139387 | 5.447739315 | 6.45E-08    | 2.75E-06    | 7.730555364  | 8.243790765 |
| HMGB1P30       | 3.043156517 | -3.305458576 | 5.440485705 | 6.71E-08    | 2.86E-06    | 7.692808217  | 8.242925849 |
| RP11-277P12.20 | 3.028865777 | -1.846268048 | 6.704779209 | 3.40E-11    | 3.84E-09    | 14.97591363  | 8.161677904 |
| DGKI           | 3.02517292  | -3.270184129 | 6.172838219 | 9.80E-10    | 7.34E-08    | 11.74059974  | 8.140813227 |

| gene              | logFC       | AveExpr      | t           | P.Value     | adj.P.Val   | B            | FoldChange  |
|-------------------|-------------|--------------|-------------|-------------|-------------|--------------|-------------|
| DLK1              | 3.023138102 | -3.02637495  | 3.779407574 | 0.000166672 | 0.002059918 | 0.316016684  | 8.129339285 |
| HoxA-AS3          | 3.022103562 | -1.699361116 | 3.651113906 | 0.00027488  | 0.003056798 | -0.146957579 | 8.123511924 |
| AQP10             | 3.020221736 | -2.851806422 | 5.63436105  | 2.29E-08    | 1.12E-06    | 8.717946572  | 8.112922666 |
| REN               | 3.01844937  | -3.637893564 | 4.151850896 | 3.58E-05    | 0.000597513 | 1.747776689  | 8.102961975 |
| GPR173            | 3.008495044 | -2.300411507 | 4.332676688 | 1.62E-05    | 0.000308191 | 2.489709438  | 8.04724549  |
| TRPV5             | 3.005808571 | -1.963306424 | 6.666395426 | 4.37E-11    | 4.80E-09    | 14.73427358  | 8.032274485 |
| FAM65C            | 3.00262054  | 3.40739569   | 4.68364432  | 3.21E-06    | 7.96E-05    | 4.016353781  | 8.014544564 |
| SPTA1             | 2.994115966 | 5.621440125  | 4.903882635 | 1.10E-06    | 3.17E-05    | 5.03232406   | 7.967438434 |
| AP000688.8        | 2.992818564 | -2.681155236 | 3.865257053 | 0.000118263 | 0.001573685 | 0.634489235  | 7.960276614 |
| PIR               | 2.986075249 | -1.692246027 | 5.516474361 | 4.42E-08    | 1.99E-06    | 8.090592287  | 7.923156227 |
| ARHGAP42          | 2.981042044 | -0.026006094 | 5.502095554 | 4.79E-08    | 2.11E-06    | 8.014924742  | 7.895562463 |
| NKAIN2            | 2.975819314 | -3.33005738  | 3.793871883 | 0.000157383 | 0.001968483 | 0.369188144  | 7.867031248 |
| PRTFDC1           | 2.971869359 | -2.017787165 | 4.798999482 | 1.84E-06    | 4.95E-05    | 4.542942246  | 7.84552156  |
| PRRG1             | 2.968897823 | -2.986832795 | 4.033094866 | 5.93E-05    | 0.00090769  | 1.277123347  | 7.82937868  |
| AL008733.1        | 2.963977788 | -4.721777432 | 5.729302284 | 1.34E-08    | 7.07E-07    | 9.232218628  | 7.80272356  |
| SLC8A3            | 2.963603865 | 0.234545389  | 4.205007812 | 2.85E-05    | 0.000494961 | 1.962717943  | 7.800701483 |
| IRX3              | 2.963277579 | -1.196512083 | 3.371730287 | 0.000776104 | 0.006955061 | -1.101274624 | 7.798937442 |
| GYG2P1            | 2.956101334 | -4.696226731 | 6.26837598  | 5.45E-10    | 4.39E-08    | 12.30355779  | 7.760240338 |
| FNBP1L            | 2.952967242 | 3.554420526  | 6.006033195 | 2.67E-09    | 1.76E-07    | 10.776879    | 7.743400389 |
| XXbac-BPG154L12.4 | 2.94711659  | -1.294573199 | 6.100406099 | 1.52E-09    | 1.08E-07    | 11.31911858  | 7.71206168  |
| IRF6              | 2.944303164 | -1.221774186 | 5.185247851 | 2.62E-07    | 9.29E-06    | 6.394773546  | 7.697036902 |
| TTLL7-IT1         | 2.940394581 | -3.13885907  | 5.171261072 | 2.82E-07    | 9.88E-06    | 6.325345089  | 7.676212131 |
| RP11-98O2.1       | 2.939932922 | -4.773339542 | 5.848277369 | 6.76E-09    | 3.90E-07    | 9.888000605  | 7.673756154 |
| PTCH1             | 2.937168036 | 0.761478717  | 5.603082582 | 2.73E-08    | 1.31E-06    | 8.550280985  | 7.659063695 |
| KEL               | 2.936260012 | 2.697820821  | 4.535181469 | 6.47E-06    | 0.000141838 | 3.356664418  | 7.65424464  |
| FAM127C           | 2.928636919 | -2.91505783  | 4.547220882 | 6.11E-06    | 0.000136148 | 3.409403074  | 7.613906846 |
| WBSCR27           | 2.907261123 | -3.166097277 | 5.989645096 | 2.95E-09    | 1.90E-07    | 10.68351681  | 7.501926471 |
| PKP2              | 2.905402636 | -0.704270606 | 3.78697485  | 0.00016175  | 0.002012917 | 0.343809744  | 7.492268677 |
| TSPYL5            | 2.895714777 | 0.663719294  | 4.485848815 | 8.12E-06    | 0.000172954 | 3.141962641  | 7.442125797 |
| MYRIP             | 2.894451419 | -3.02536865  | 5.004025509 | 6.65E-07    | 2.02E-05    | 5.508977346  | 7.43561163  |
| WBP5              | 2.893784035 | -1.344708703 | 4.176534499 | 3.22E-05    | 0.000548351 | 1.847257423  | 7.432172749 |
| HRASLS            | 2.884643814 | -4.700479954 | 6.019052544 | 2.47E-09    | 1.64E-07    | 10.85121831  | 7.385234924 |
| MYL4              | 2.884303121 | 1.388409227  | 4.106934172 | 4.34E-05    | 0.000702103 | 1.568211917  | 7.383491104 |
| BEX1              | 2.881999584 | -0.339662265 | 3.517560077 | 0.000455468 | 0.004544802 | -0.612383916 | 7.371711362 |
| EPCAM             | 2.880400941 | -1.039240291 | 4.205623508 | 2.84E-05    | 0.000494073 | 1.965222969  | 7.363547332 |
| CA3               | 2.879120894 | -0.929699976 | 5.23054471  | 2.07E-07    | 7.57E-06    | 6.620837851  | 7.357016844 |
| AC073410.1        | 2.873239795 | -1.561199492 | 6.183252696 | 9.20E-10    | 6.92E-08    | 11.80157953  | 7.327087248 |
| DNAH8             | 2.870616272 | -1.170081655 | 4.058345069 | 5.33E-05    | 0.000832476 | 1.376090238  | 7.313775138 |
| TSSC2             | 2.869606355 | -3.051182754 | 6.083687859 | 1.68E-09    | 1.18E-07    | 11.22248949  | 7.308657133 |
| ZNF334            | 2.867393881 | -0.657074634 | 3.832018953 | 0.000135172 | 0.001750045 | 0.510363877  | 7.297457386 |
| SH3BGR2           | 2.865779413 | 0.927584446  | 5.532622235 | 4.05E-08    | 1.85E-06    | 8.175790457  | 7.289295634 |
| AC003102.3        | 2.861900829 | -1.144407104 | 5.563085264 | 3.42E-08    | 1.59E-06    | 8.33715336   | 7.269725194 |
| PROX1             | 2.861876736 | -3.896302334 | 5.123993224 | 3.60E-07    | 1.20E-05    | 6.092027507  | 7.269603792 |
| AC007392.3        | 2.861526138 | -2.655558433 | 4.559784098 | 5.77E-06    | 0.00012981  | 3.46457907   | 7.267837372 |
| NCKAP1            | 2.860413247 | 0.37897157   | 5.223384519 | 2.14E-07    | 7.84E-06    | 6.584979609  | 7.262233148 |
| MEIS1             | 2.853125554 | 4.224880425  | 2.715177469 | 0.006740223 | 0.035338952 | -3.050981448 | 7.225640881 |
| MYH10             | 2.842546502 | 2.365817699  | 4.996396107 | 6.91E-07    | 2.09E-05    | 5.472341298  | 7.172850201 |
| TRPC1             | 2.836103751 | -0.22006639  | 6.32745403  | 3.78E-10    | 3.13E-08    | 12.65566381  | 7.14088929  |
| LTBP1             | 2.831374653 | 3.955154624  | 4.460182174 | 9.13E-06    | 0.00019157  | 3.031149065  | 7.117520055 |
| ANKRD5            | 2.831357367 | -1.1982838   | 5.699671576 | 1.59E-08    | 8.20E-07    | 9.070854154  | 7.117434776 |
| INTU              | 2.823510778 | -0.49763882  | 3.893279007 | 0.00010558  | 0.00144276  | 0.739942671  | 7.078829257 |
| MORC1             | 2.815873678 | -3.071100144 | 5.38756272  | 8.94E-08    | 3.66E-06    | 7.418834041  | 7.041455532 |
| SCN9A             | 2.808445897 | -0.504871057 | 3.613958608 | 0.000316856 | 0.00342603  | -0.278136497 | 7.005295444 |
| RP11-3K16.2       | 2.807735781 | -4.909664383 | 5.491380109 | 5.08E-08    | 2.22E-06    | 7.958656026  | 7.001848181 |
| STXBP1            | 2.806940062 | -0.316570241 | 5.173567577 | 2.78E-07    | 9.78E-06    | 6.336782048  | 6.997987377 |
| KALP              | 2.802147483 | -2.27039892  | 3.173655945 | 0.001552112 | 0.011816714 | -1.732908739 | 6.974778891 |
| EREG              | 2.799627053 | 3.833717236  | 3.38904125  | 0.000729258 | 0.006616234 | -1.044296839 | 6.962604391 |
| RP11-757G1.6      | 2.798662079 | -0.293524253 | 5.702759783 | 1.56E-08    | 8.10E-07    | 9.087635566  | 6.957948879 |
| RP11-11N9.4       | 2.795465284 | -1.595690691 | 4.415180001 | 1.12E-05    | 0.000227658 | 2.838329273  | 6.942548182 |
| C6orf223          | 2.79481284  | -1.280384549 | 4.719744908 | 2.70E-06    | 6.84E-05    | 4.179835517  | 6.939409191 |





| gene         | logFC       | AveExpr      | t           | P.Value     | adj.P.Val   | B            | FoldChange  |
|--------------|-------------|--------------|-------------|-------------|-------------|--------------|-------------|
| AMPH         | 2.412548186 | -3.283654858 | 4.336402525 | 1.60E-05    | 0.000304891 | 2.50531674   | 5.324138811 |
| CTC-756D1.1  | 2.411940065 | -3.340059885 | 4.421146166 | 1.09E-05    | 0.000222662 | 2.863784404  | 5.321895068 |
| NOX5         | 2.409300132 | -2.74596002  | 3.894282408 | 0.000105151 | 0.001438879 | 0.743732407  | 5.312165639 |
| FAM188B      | 2.409071268 | 1.251439954  | 6.872264943 | 1.12E-11    | 1.43E-09    | 16.04505729  | 5.311323001 |
| TPM1         | 2.408836621 | 3.207060741  | 6.222731664 | 7.22E-10    | 5.65E-08    | 12.03360231  | 5.310459213 |
| BEST3        | 2.408800608 | -3.71953983  | 4.558585901 | 5.80E-06    | 0.00013024  | 3.459310457  | 5.310326655 |
| AL033532.1   | 2.403413753 | -2.829712778 | 4.942829808 | 9.05E-07    | 2.66E-05    | 5.216613807  | 5.290535483 |
| TAL1         | 2.403044002 | 4.713842273  | 4.123908694 | 4.04E-05    | 0.000658132 | 1.635849771  | 5.289179736 |
| ESPN         | 2.400334726 | -0.061905763 | 3.852476262 | 0.000124514 | 0.001639221 | 0.586637245  | 5.279256365 |
| MDGA2        | 2.399344723 | -3.828933768 | 4.00776649  | 6.59E-05    | 0.000990572 | 1.178450124  | 5.275634887 |
| AK7          | 2.398449436 | -1.698175924 | 5.244772706 | 1.92E-07    | 7.10E-06    | 6.692229392  | 5.272362024 |
| LRRC16A      | 2.396975168 | 2.019663676  | 5.179848601 | 2.69E-07    | 9.52E-06    | 6.367951387  | 5.266977029 |
| KIF5A        | 2.395941102 | -2.077903041 | 4.878235166 | 1.25E-06    | 3.53E-05    | 4.911723171  | 5.263203226 |
| ADCY10       | 2.395510254 | -0.285660902 | 9.397699983 | 3.79E-20    | 2.34E-17    | 34.96058949  | 5.26163165  |
| HBZ          | 2.39469313  | -2.526920318 | 4.108617262 | 4.31E-05    | 0.000698233 | 1.574906443  | 5.258652374 |
| ELOVL7       | 2.388850977 | 0.569424715  | 4.855288053 | 1.40E-06    | 3.90E-05    | 4.804330354  | 5.237400668 |
| SOBP         | 2.377022551 | -1.81899302  | 3.813782602 | 0.000145393 | 0.001845342 | 0.442703296  | 5.194635609 |
| TUBAL3       | 2.373073046 | -3.400120311 | 3.793463143 | 0.000157639 | 0.001969191 | 0.36768289   | 5.180434281 |
| RP11-571I7.3 | 2.370335199 | -3.367998981 | 4.563190506 | 5.68E-06    | 0.000128055 | 3.479564698  | 5.170612534 |
| GATA1        | 2.367286489 | 2.531849959  | 4.066851142 | 5.15E-05    | 0.000808905 | 1.409563788  | 5.159697508 |
| FKBP10       | 2.366846244 | -1.654304004 | 3.827801851 | 0.000137473 | 0.00176406  | 0.494689735  | 5.158123244 |
| PDE5A        | 2.364878574 | -0.668460197 | 3.595826346 | 0.000339457 | 0.003607321 | -0.341679314 | 5.151092954 |
| PKIA         | 2.360132923 | -0.245730678 | 4.6793503   | 3.28E-06    | 8.10E-05    | 3.996988097  | 5.134176608 |
| RHEBL1       | 2.358901837 | 0.088296638  | 6.662783681 | 4.47E-11    | 4.86E-09    | 14.71160143  | 5.129797362 |
| BRSK1        | 2.357316161 | -0.626551682 | 5.918711944 | 4.48E-09    | 2.71E-07    | 10.28214718  | 5.124162262 |
| TMEM56       | 2.355006737 | 2.499724612  | 3.653241555 | 0.000272642 | 0.003035887 | -0.139406274 | 5.115966216 |
| TFR2         | 2.351681009 | 3.839479456  | 5.049826257 | 5.27E-07    | 1.66E-05    | 5.730025702  | 5.104186376 |
| RAB23        | 2.339017937 | -1.052341678 | 4.797458096 | 1.86E-06    | 4.98E-05    | 4.535825355  | 5.059581073 |
| NOG          | 2.33593368  | 0.850238749  | 4.784736434 | 1.97E-06    | 5.22E-05    | 4.477170126  | 5.048776034 |
| ASIC4        | 2.335071857 | -1.748850986 | 5.456412018 | 6.15E-08    | 2.65E-06    | 7.775749424  | 5.045760947 |
| LEF1         | 2.332842611 | 4.031756762  | 5.212929197 | 2.27E-07    | 8.21E-06    | 6.532702747  | 5.037970279 |
| ANKRD20A11P  | 2.330672262 | -1.949552948 | 3.830598481 | 0.000135943 | 0.001752472 | 0.505082391  | 5.030397    |
| KRT8P31      | 2.329890171 | -3.188850372 | 4.27441628  | 2.10E-05    | 0.000383186 | 2.247339549  | 5.027670738 |
| CHAC1        | 2.328097367 | -0.063455649 | 4.457808887 | 9.23E-06    | 0.00019314  | 3.020933413  | 5.021426849 |
| SLC40A1      | 2.32513329  | 4.811456413  | 4.289964092 | 1.96E-05    | 0.000363809 | 2.311711264  | 5.011120707 |
| GOLGA8B      | 2.323885383 | 4.363525112  | 5.642772741 | 2.19E-08    | 1.09E-06    | 8.763185866  | 5.006788049 |
| PLEK2        | 2.32332893  | -1.244321015 | 3.69299212  | 0.000233846 | 0.002694876 | 0.002460262  | 5.004857283 |
| ROR1         | 2.322001018 | -2.8566247   | 4.010893779 | 6.51E-05    | 0.000978493 | 1.190600752  | 5.000252739 |
| MAP9         | 2.315719909 | 0.172305411  | 5.27722908  | 1.61E-07    | 6.12E-06    | 6.855770532  | 4.978530295 |
| COL25A1      | 2.309847851 | -2.635158677 | 4.67285822  | 3.38E-06    | 8.33E-05    | 3.967741578  | 4.958307859 |
| LY6G6D       | 2.302928877 | -3.510699164 | 4.629399829 | 4.16E-06    | 9.84E-05    | 3.77296336   | 4.934585405 |
| HMCN1        | 2.302319463 | -1.985372695 | 4.648081378 | 3.81E-06    | 9.13E-05    | 3.856479824  | 4.932501407 |
| DGKE         | 2.29503718  | 4.784195548  | 9.859451163 | 6.25E-22    | 4.76E-19    | 38.95683052  | 4.907666385 |
| TMEM200A     | 2.290426875 | -2.888689415 | 4.230363799 | 2.55E-05    | 0.000449137 | 2.066174123  | 4.892008379 |
| SCHIP1       | 2.290378933 | 0.431959807  | 2.851555988 | 0.004441748 | 0.026344273 | -2.679985149 | 4.891845816 |
| KLF1         | 2.290218893 | 2.596586989  | 3.831862286 | 0.000135256 | 0.001750045 | 0.509781274  | 4.891303187 |
| SLC30A4      | 2.286763039 | 0.18557242   | 5.307293879 | 1.38E-07    | 5.32E-06    | 7.008110583  | 4.879600508 |
| SELENBP1     | 2.281113983 | 3.607480183  | 3.253463898 | 0.001178953 | 0.009588135 | -1.482909475 | 4.860531167 |
| AP000269.1   | 2.280660786 | -2.515109671 | 4.800914011 | 1.83E-06    | 4.91E-05    | 4.551785045  | 4.859004559 |
| GP1BA        | 2.276442953 | 0.489413036  | 3.722542156 | 0.000208434 | 0.002459327 | 0.108889053  | 4.844819619 |
| APOC1        | 2.273336441 | -1.408833591 | 4.040292361 | 5.76E-05    | 0.000886203 | 1.305272716  | 4.834398641 |
| TMOD1        | 2.270093405 | 3.422396914  | 4.880282381 | 1.24E-06    | 3.50E-05    | 4.921327588  | 4.823543592 |
| HOTTIP       | 2.269091476 | -3.889571076 | 3.848866259 | 0.000126335 | 0.001656584 | 0.573149032  | 4.820194881 |
| MPDZ         | 2.265867529 | -3.087811866 | 3.582468642 | 0.000357063 | 0.003754096 | -0.388291074 | 4.809435365 |
| TRPV6        | 2.265310943 | -0.659213908 | 3.992088746 | 7.04E-05    | 0.001042251 | 1.117674724  | 4.807580259 |
| PLEKHG1      | 2.264540141 | 2.229555101  | 4.958288941 | 8.37E-07    | 2.49E-05    | 5.290147394  | 4.805012355 |
| KLRC2        | 2.263495332 | -1.78715933  | 4.733223273 | 2.53E-06    | 6.45E-05    | 4.241179701  | 4.801533797 |
| SERPINE2     | 2.261706967 | 1.670397952  | 4.447873227 | 9.66E-06    | 0.000200621 | 2.978222702  | 4.7955855   |
| NFIA         | 2.260171039 | 1.988067197  | 4.01802187  | 6.32E-05    | 0.000953455 | 1.21833017   | 4.790482722 |
| RP11-673E1.3 | 2.260037512 | -2.024320258 | 4.702920844 | 2.93E-06    | 7.32E-05    | 4.103498447  | 4.790039363 |

| gene          | logFC       | AveExpr      | t           | P.Value     | adj.P.Val   | B            | FoldChange  |
|---------------|-------------|--------------|-------------|-------------|-------------|--------------|-------------|
| RP11-178L8.5  | 2.259745535 | -2.75760356  | 5.152801394 | 3.10E-07    | 1.07E-05    | 6.23398542   | 4.789070041 |
| IFIT1B        | 2.259051084 | 1.902424885  | 2.844391696 | 0.004542021 | 0.026755869 | -2.699919512 | 4.786765344 |
| SLC22A23      | 2.255978918 | 2.785522205  | 4.161443069 | 3.44E-05    | 0.000577755 | 1.786367823  | 4.776582948 |
| RP11-382A20.2 | 2.249958301 | -3.342709117 | 4.365375019 | 1.40E-05    | 0.000273333 | 2.627120906  | 4.756690972 |
| CREB3L1       | 2.249803484 | -2.960477552 | 4.754874711 | 2.28E-06    | 5.91E-05    | 4.340071614  | 4.756180553 |
| GJA4          | 2.247924913 | -3.262635536 | 3.597695462 | 0.000337059 | 0.003587622 | -0.335143554 | 4.749991437 |
| TMEM136       | 2.245082251 | -1.004385728 | 2.934659171 | 0.003416862 | 0.021579782 | -2.44515214  | 4.740641351 |
| GOLGA8A       | 2.241192457 | 5.077881049  | 5.787948637 | 9.58E-09    | 5.29E-07    | 9.553901562  | 4.72787685  |
| RP5-1033H22.2 | 2.239254366 | -0.130698164 | 4.475199724 | 8.53E-06    | 0.000179878 | 3.095912034  | 4.721529766 |
| C6orf183      | 2.23815507  | -0.481050789 | 6.110082749 | 1.43E-09    | 1.02E-07    | 11.37516043  | 4.717933454 |
| GPC6          | 2.231067399 | -3.959408815 | 3.234002905 | 0.001261388 | 0.010127191 | -1.544431461 | 4.694812038 |
| LANCL3        | 2.230603544 | 0.861171402  | 4.276300516 | 2.09E-05    | 0.00038107  | 2.255128763  | 4.693302806 |
| AVPR1A        | 2.228767467 | -3.752868279 | 4.091263037 | 4.64E-05    | 0.000740143 | 1.506006814  | 4.68733357  |
| SPTB          | 2.228540563 | 5.023512872  | 3.378664769 | 0.000757012 | 0.006827257 | -1.078484489 | 4.686596415 |
| CD274         | 2.22613559  | -0.412683005 | 5.452884789 | 6.27E-08    | 2.69E-06    | 7.757360632  | 4.678790366 |
| CYP4F29P      | 2.225545428 | -2.909926895 | 3.877271831 | 0.000112658 | 0.001517474 | 0.679613341  | 4.67687681  |
| RHD           | 2.219465157 | 0.823982421  | 2.953791498 | 0.003213784 | 0.020599656 | -2.390149494 | 4.657207482 |
| C3orf80       | 2.216668655 | -0.506800623 | 2.575770555 | 0.010146904 | 0.047588713 | -3.411705146 | 4.648188754 |
| RP11-79H23.3  | 2.216001017 | -3.039459124 | 4.373635298 | 1.35E-05    | 0.000264757 | 2.661991054  | 4.646038202 |
| ARHGEF25      | 2.215228305 | -2.923152212 | 4.369130179 | 1.38E-05    | 0.000269294 | 2.642965177  | 4.643550437 |
| FAM81B        | 2.2131881   | -1.656162745 | 4.24313552  | 2.41E-05    | 0.000429331 | 2.118511607  | 4.636988344 |
| DLX1          | 2.212885488 | -3.513522984 | 4.180642324 | 3.17E-05    | 0.000541034 | 1.863868133  | 4.636015814 |
| MET           | 2.211708291 | -2.679265625 | 3.705744433 | 0.000222542 | 0.00258494  | 0.048288466  | 4.632234506 |
| LDOC1         | 2.211313564 | -3.082748036 | 4.434590857 | 1.03E-05    | 0.000212024 | 2.921268288  | 4.630967281 |
| PRPH2         | 2.20847319  | -3.010033747 | 3.992157308 | 7.04E-05    | 0.001042251 | 1.117940005  | 4.621858814 |
| RP11-337N19.1 | 2.205837827 | -2.747350997 | 4.564445943 | 5.64E-06    | 0.000127452 | 3.485090377  | 4.613423798 |
| CCNJL         | 2.203474795 | -0.362072949 | 3.767105485 | 0.000174975 | 0.002137185 | 0.270948825  | 4.60587352  |
| PHOSPHO1      | 2.19532531  | 1.790055003  | 3.367102494 | 0.000789094 | 0.007042758 | -1.116458391 | 4.579929245 |
| LINC00570     | 2.192863894 | -2.677925385 | 3.474182379 | 0.000534787 | 0.005182091 | -0.759916278 | 4.572121979 |
| CR1L          | 2.191912134 | 0.213661889  | 3.773196922 | 0.000170816 | 0.002096879 | 0.293246552  | 4.569106701 |
| TEAD2         | 2.188802971 | -2.717978358 | 4.06384031  | 5.21E-05    | 0.000816    | 1.397707656  | 4.559270389 |
| PAQR9         | 2.179489902 | -0.745544064 | 3.143291537 | 0.001720699 | 0.012728023 | -1.826428829 | 4.529933596 |
| TBC1D8B       | 2.179195519 | -1.922642005 | 3.418371478 | 0.000655843 | 0.006072612 | -0.947108255 | 4.529009353 |
| RP1-18D14.7   | 2.179154195 | -3.6175148   | 4.141111755 | 3.75E-05    | 0.00061994  | 1.704673053  | 4.528879628 |
| HEPH          | 2.170078248 | -2.441840454 | 4.333185118 | 1.62E-05    | 0.000307788 | 2.491838462  | 4.500478025 |
| JMY           | 2.169893018 | 5.511031593  | 5.922709566 | 4.38E-09    | 2.67E-07    | 10.30464922  | 4.49990024  |
| SYN3          | 2.157536202 | -2.84011892  | 4.531736709 | 6.57E-06    | 0.000143645 | 3.341599299  | 4.461522766 |
| PLCH1         | 2.157109584 | -0.154766023 | 3.525033292 | 0.000442967 | 0.004456014 | -0.586786479 | 4.46020365  |
| F2RL2         | 2.157037571 | -3.654244138 | 3.813144871 | 0.000145763 | 0.001846489 | 0.440342852  | 4.459981021 |
| HSPA1A        | 2.155838011 | 4.74665294   | 4.264761841 | 2.19E-05    | 0.000396533 | 2.207481089  | 4.456274215 |
| SCG5          | 2.153717031 | -0.38511997  | 5.674480867 | 1.83E-08    | 9.24E-07    | 8.934284544  | 4.44972763  |
| PDGFD         | 2.149443722 | 0.065779352  | 3.450245227 | 0.000583901 | 0.005543979 | -0.840564686 | 4.436566894 |
| PRKG1         | 2.148604373 | -3.86447121  | 3.832495137 | 0.000134914 | 0.001750045 | 0.512134809  | 4.433986487 |
| MOV10L1       | 2.146218086 | -2.615157847 | 4.549862937 | 6.04E-06    | 0.000134724 | 3.420994525  | 4.426658522 |
| CAND2         | 2.145181465 | 0.15353055   | 4.288181298 | 1.98E-05    | 0.000365659 | 2.304318646  | 4.423478973 |
| EPB41L3       | 2.144915471 | 0.650960051  | 3.192495906 | 0.001455311 | 0.011266134 | -1.674440434 | 4.422663479 |
| CTD-2555A7.2  | 2.142351726 | -2.607278734 | 3.99289355  | 7.01E-05    | 0.001040767 | 1.120788967  | 4.414811152 |
| IL1A          | 2.140348797 | -3.357777778 | 4.04778431  | 5.58E-05    | 0.000862124 | 1.334625236  | 4.408686213 |
| MT1E          | 2.138481816 | -1.539658642 | 3.463913398 | 0.000555365 | 0.005320441 | -0.79458087  | 4.402984653 |
| RGS16         | 2.138154847 | -0.027077736 | 3.537127834 | 0.000423412 | 0.004296439 | -0.545247785 | 4.401986884 |
| CEACAM22P     | 2.136971684 | -3.865265707 | 3.869413522 | 0.000116295 | 0.001555004 | 0.650084394  | 4.39837827  |
| CACNA1E       | 2.136562751 | -1.859693733 | 3.680001938 | 0.000245914 | 0.00280455  | -0.044064864 | 4.397131722 |
| TRIM15        | 2.135245392 | -2.745677649 | 3.446080072 | 0.000592865 | 0.005615618 | -0.85454225  | 4.393118429 |
| KIAA1210      | 2.133776294 | -4.685802682 | 3.908828901 | 9.91E-05    | 0.001374253 | 0.798779192  | 4.388647188 |
| RGAG1         | 2.130880157 | -3.625946486 | 3.920846989 | 9.44E-05    | 0.001321451 | 0.844408003  | 4.37984604  |
| CA13          | 2.130779109 | 0.827749876  | 5.787021994 | 9.63E-09    | 5.31E-07    | 9.548795028  | 4.37953928  |
| SLFN14        | 2.130089531 | 1.206669999  | 3.58384593  | 0.000355209 | 0.003736587 | -0.383492833 | 4.377446453 |
| RP11-48O20.4  | 2.128952498 | -2.35768481  | 4.107410145 | 4.33E-05    | 0.000701255 | 1.570104841  | 4.373997809 |
| KCNH2         | 2.128084499 | 3.200925109  | 3.555293668 | 0.000395553 | 0.004076464 | -0.482596765 | 4.37136698  |
| ZFP57         | 2.124974461 | -3.314660115 | 2.555157704 | 0.010763711 | 0.049727188 | -3.463451406 | 4.361953713 |





| gene          | logFC       | AveExpr      | t           | P.Value     | adj.P.Val   | B            | FoldChange  |
|---------------|-------------|--------------|-------------|-------------|-------------|--------------|-------------|
| TRPV3         | 1.915884753 | -0.411777817 | 3.843056552 | 0.000129319 | 0.001689153 | 0.551467718  | 3.773451557 |
| ARHGAP39      | 1.914052488 | -1.985508655 | 3.513922006 | 0.000461672 | 0.004589648 | -0.624825964 | 3.768662205 |
| DVL2          | 1.912394677 | 5.168496033  | 16.51086716 | 3.12E-54    | 3.08E-50    | 111.5928831  | 3.764334096 |
| RP11-145F16.2 | 1.912053972 | 0.672857149  | 5.262646199 | 1.74E-07    | 6.56E-06    | 6.782172463  | 3.763445219 |
| PHLDB1        | 1.909496127 | 2.134016699  | 4.200158401 | 2.91E-05    | 0.000504162 | 1.942999929  | 3.756778683 |
| KCNJ2         | 1.908288594 | -1.374800795 | 2.901158873 | 0.003800824 | 0.02336344  | -2.54061485  | 3.75363558  |
| PBK           | 1.906008053 | -0.392742669 | 3.523430323 | 0.000445621 | 0.004469748 | -0.592281469 | 3.747706706 |
| SEPP1         | 1.905479158 | 2.04201751   | 2.658208884 | 0.007983389 | 0.039969794 | -3.200654679 | 3.746333041 |
| PURG          | 1.900558264 | -3.37829891  | 3.261246608 | 0.001147404 | 0.009397218 | -1.458204932 | 3.733576429 |
| BEX2          | 1.894534342 | 0.518048388  | 3.574297617 | 0.000368251 | 0.003849224 | -0.416720626 | 3.718019514 |
| AQP1          | 1.890007578 | 3.500329911  | 3.651016176 | 0.000274984 | 0.003056798 | -0.147304333 | 3.706371717 |
| WHAMMP2       | 1.88817686  | 2.232506648  | 2.753461999 | 0.006005672 | 0.0326004   | -2.948640766 | 3.701671473 |
| CTB-114C7.3   | 1.883971255 | -1.75552509  | 4.561370374 | 5.72E-06    | 0.000129    | 3.471556156  | 3.690896431 |
| FAM40B        | 1.883094341 | 1.817307576  | 4.187704199 | 3.07E-05    | 0.000527496 | 1.892460869  | 3.688653672 |
| ABLM1         | 1.882678544 | 5.46031411   | 4.82111329  | 1.65E-06    | 4.52E-05    | 4.645286068  | 3.687590724 |
| RAPGEF5       | 1.882659186 | -0.426410351 | 3.284088351 | 0.001059267 | 0.008840028 | -1.38536534  | 3.687541246 |
| KCNJ12        | 1.879567405 | -1.583022501 | 3.17372557  | 0.001551744 | 0.011816714 | -1.732693286 | 3.679647088 |
| PTK2          | 1.877933669 | 3.582866748  | 3.861770111 | 0.000119938 | 0.001590629 | 0.621418685  | 3.675482543 |
| LGR4          | 1.876999269 | 1.539307749  | 3.189452817 | 0.00147056  | 0.011361953 | -1.683907363 | 3.673102789 |
| TSPAN5        | 1.87395873  | 2.726595603  | 3.77782409  | 0.000167719 | 0.002063843 | 0.3102077    | 3.665369725 |
| STXBP6        | 1.872889261 | -2.573883664 | 2.702160956 | 0.007007809 | 0.036388935 | -3.085455214 | 3.662653596 |
| MT1G          | 1.866890632 | -3.619668406 | 3.337828553 | 0.000876056 | 0.007637409 | -1.212033982 | 3.647456145 |
| TMEM163       | 1.865065429 | -0.522271856 | 3.134751371 | 0.001771066 | 0.013008198 | -1.852573186 | 3.642844541 |
| C10orf10      | 1.863773865 | 1.850125812  | 3.244105593 | 0.001217951 | 0.009832555 | -1.51253894  | 3.639584765 |
| CD46P1        | 1.861335672 | -2.384476757 | 3.696143203 | 0.000231003 | 0.00266678  | 0.013770078  | 3.633438965 |
| RP11-121L10.3 | 1.860577543 | -0.940013878 | 6.034254889 | 2.26E-09    | 1.53E-07    | 10.93821129  | 3.631530114 |
| AC010507.5    | 1.860345365 | -2.753720065 | 3.575027924 | 0.000367238 | 0.003840663 | -0.414182234 | 3.630945724 |
| RGS22         | 1.857430109 | -3.165846499 | 4.011119217 | 6.50E-05    | 0.000978318 | 1.19147701   | 3.623616075 |
| CRISP2        | 1.851286061 | -3.416068802 | 3.084533267 | 0.00209573  | 0.014810075 | -2.004897608 | 3.608216889 |
| MYLK4         | 1.848749704 | 2.093362326  | 4.871175188 | 1.29E-06    | 3.64E-05    | 4.878631029  | 3.601878967 |
| TCL1A         | 1.847716796 | -0.563767996 | 3.180885507 | 0.001514285 | 0.011609124 | -1.710512444 | 3.599301099 |
| LRRC49        | 1.846403173 | -3.080286265 | 3.124421898 | 0.001833799 | 0.01335003  | -1.884102089 | 3.596025304 |
| C12orf39      | 1.846099611 | -2.024582027 | 3.270240061 | 0.001111921 | 0.009182631 | -1.429585232 | 3.595268734 |
| SLC2A4        | 1.845065558 | 0.582334879  | 3.097852364 | 0.002004673 | 0.014292692 | -1.964732326 | 3.592692745 |
| TTC12         | 1.838538321 | 0.977526121  | 4.392918605 | 1.24E-05    | 0.000246318 | 2.743640655  | 3.57647491  |
| BBS12         | 1.836848876 | 0.134185707  | 6.344465308 | 3.40E-10    | 2.84E-08    | 12.75761507  | 3.57228919  |
| ARHGAP11A     | 1.835280639 | 5.078836065  | 7.219003804 | 1.05E-12    | 1.66E-10    | 18.33419473  | 3.568408152 |
| AK4           | 1.834995145 | 1.641448075  | 3.253094051 | 0.001180472 | 0.009594481 | -1.484082038 | 3.567702071 |
| MST1R         | 1.832730693 | -1.002169792 | 4.03337593  | 5.92E-05    | 0.000907324 | 1.278221674  | 3.562106603 |
| SLC9A9        | 1.831281158 | 1.86447895   | 3.891884405 | 0.00010618  | 0.001448951 | 0.734676987  | 3.558529407 |
| AC009237.1    | 1.830511303 | -2.967686534 | 3.268073203 | 0.001120376 | 0.009232133 | -1.436487833 | 3.556631    |
| FAM171A2      | 1.829090706 | -0.014350563 | 3.904775753 | 0.000100758 | 0.00138934  | 0.783421299  | 3.553130572 |
| AKR1C1        | 1.828951976 | 2.039060854  | 4.150149456 | 3.61E-05    | 0.000600882 | 1.740940444  | 3.552788918 |
| CPEB2         | 1.827001407 | 5.13946125   | 4.18914793  | 3.05E-05    | 0.000525122 | 1.898312103  | 3.54798868  |
| NEFH          | 1.826690602 | -1.396835545 | 2.794049414 | 0.005306534 | 0.029852616 | -2.838603838 | 3.547224407 |
| AC104820.2    | 1.826611681 | -1.398764212 | 4.593841874 | 4.92E-06    | 0.000113137 | 3.614889627  | 3.547030366 |
| FAM20A        | 1.826571029 | -1.807071444 | 2.652620934 | 0.008115777 | 0.040450095 | -3.21516745  | 3.546930419 |
| ANKRD13B      | 1.826393455 | 2.267957833  | 5.793393987 | 9.28E-09    | 5.15E-07    | 9.583925137  | 3.546493872 |
| Z95704.2      | 1.820027425 | -0.367758225 | 2.881241701 | 0.004047319 | 0.024538027 | -2.596860429 | 3.530879104 |
| SLC35G1       | 1.818462619 | -0.753182567 | 3.121779716 | 0.001850171 | 0.013444484 | -1.892150505 | 3.527051445 |
| ART4          | 1.816249808 | -0.54519427  | 2.667240644 | 0.007773503 | 0.039139846 | -3.177134165 | 3.521645788 |
| RP11-90D4.2   | 1.816094454 | -0.662098323 | 3.605685762 | 0.000326987 | 0.003516338 | -0.307166506 | 3.521266587 |
| UBN2          | 1.815323129 | 6.448902298  | 12.67833315 | 3.19E-34    | 1.07E-30    | 66.5699756   | 3.519384473 |
| MEIS3P2       | 1.814711985 | -3.338669605 | 3.30694446  | 0.000977389 | 0.008307217 | -1.311982336 | 3.517893934 |
| LRRC32        | 1.814569821 | -0.303770625 | 3.331665388 | 0.000895463 | 0.00775428  | -1.23205199  | 3.517547295 |
| RP11-136K14.1 | 1.814015276 | -2.547552568 | 3.906775421 | 9.99E-05    | 0.001379996 | 0.790996368  | 3.516195474 |
| MAP3K13       | 1.809508459 | 1.024141225  | 3.825081773 | 0.000138977 | 0.001777596 | 0.484588622  | 3.505228414 |
| PFKM          | 1.80924965  | 2.767970659  | 5.66130592  | 1.97E-08    | 9.90E-07    | 8.863082904  | 3.504599658 |
| ABCB6         | 1.802303656 | 3.25294128   | 4.478493456 | 8.40E-06    | 0.00017813  | 3.110144133  | 3.487766979 |
| AKAP6         | 1.802218264 | -0.071150266 | 4.177528199 | 3.21E-05    | 0.000546473 | 1.851274179  | 3.487560548 |



| gene             | logFC       | AveExpr      | t           | P.Value     | adj.P.Val   | B            | FoldChange  |
|------------------|-------------|--------------|-------------|-------------|-------------|--------------|-------------|
| RGMB             | 1.700432191 | -0.225948189 | 3.831530034 | 0.000135437 | 0.001750045 | 0.508545802  | 3.249983044 |
| PPIAP19          | 1.700414064 | -3.030631989 | 3.778685942 | 0.000167148 | 0.002061946 | 0.313369095  | 3.249942208 |
| SDR42E1          | 1.698982062 | -2.09105712  | 3.594706015 | 0.000340902 | 0.003616848 | -0.345595203 | 3.246717955 |
| RAB6B            | 1.697748738 | 1.849704256  | 2.83632455  | 0.004657385 | 0.027172566 | -2.722307002 | 3.243943602 |
| CXCL11           | 1.697168522 | -3.665681801 | 3.236009381 | 0.001252649 | 0.01006749  | -1.538105093 | 3.242639231 |
| FAM132B          | 1.695263455 | 0.745692651  | 2.623608859 | 0.008835268 | 0.042943611 | -3.290032439 | 3.23836018  |
| SOX6             | 1.69484625  | 2.418300979  | 2.761633007 | 0.005858578 | 0.032049679 | -2.926615678 | 3.237423832 |
| TECTA            | 1.692162521 | 0.322992545  | 4.789167373 | 1.93E-06    | 5.14E-05    | 4.497582815  | 3.231407111 |
| KREMEN1          | 1.689523229 | 1.820868582  | 3.296753525 | 0.001013143 | 0.008535389 | -1.344763354 | 3.225500922 |
| SLC12A3          | 1.688801264 | -2.122215802 | 2.838933306 | 0.004619791 | 0.027060926 | -2.71507417  | 3.223887195 |
| SPESP1           | 1.685689851 | -3.111952582 | 3.275609821 | 0.001091223 | 0.009049465 | -1.412460389 | 3.216941836 |
| EPSTI1           | 1.685427947 | 3.225847665  | 3.84303325  | 0.000129331 | 0.001689153 | 0.551380818  | 3.21635789  |
| ZNF502           | 1.68400002  | -0.862775576 | 3.395569646 | 0.000712285 | 0.006506915 | -1.022735107 | 3.213176433 |
| RP11-792D21.2    | 1.682327234 | -1.005855151 | 3.507816235 | 0.000472263 | 0.004671157 | -0.645679229 | 3.209452556 |
| ARHGAP22         | 1.681905145 | 1.510348857  | 3.083688385 | 0.002101632 | 0.014832608 | -2.007439727 | 3.208513704 |
| COLEC12          | 1.679518437 | -2.036819252 | 2.694989432 | 0.007159284 | 0.036919667 | -3.104379019 | 3.203210119 |
| ZNF418           | 1.678707816 | 1.731308276  | 3.489090059 | 0.000506177 | 0.00493872  | -0.709414918 | 3.201410807 |
| GAL              | 1.676890933 | -2.781332462 | 3.272387583 | 0.0011036   | 0.009125338 | -1.42273981  | 3.197381592 |
| FAM109B          | 1.672924888 | 1.145275844  | 4.023324764 | 6.18E-05    | 0.000935426 | 1.238990173  | 3.188603892 |
| TCL6             | 1.67205637  | -0.716016457 | 3.105476244 | 0.001954203 | 0.01403041  | -1.941665282 | 3.186684895 |
| ASPG             | 1.671129347 | -4.032378846 | 3.353216643 | 0.000829291 | 0.00732553  | -1.161895532 | 3.184637907 |
| AMH              | 1.670877655 | 1.179857762  | 5.045080967 | 5.40E-07    | 1.69E-05    | 5.707034748  | 3.184082363 |
| CACHD1           | 1.670298485 | 1.310273333  | 3.164781385 | 0.001599738 | 0.012058669 | -1.760332796 | 3.182804369 |
| C1orf53          | 1.668823192 | -2.403013106 | 4.056815088 | 5.37E-05    | 0.000836536 | 1.37007656   | 3.179551313 |
| BCAR1            | 1.668205797 | -1.911904368 | 3.12208037  | 0.001848301 | 0.013440769 | -1.891235013 | 3.17819093  |
| DTX1             | 1.666722037 | 1.003160869  | 3.042480228 | 0.00240874  | 0.016446424 | -2.130599501 | 3.174923955 |
| KLHDC8B          | 1.665633584 | 1.773967882  | 5.063351006 | 4.92E-07    | 1.57E-05    | 5.795665652  | 3.172529511 |
| RFESD            | 1.66273784  | 1.451281379  | 3.989211656 | 7.12E-05    | 0.00105053  | 1.1065466    | 3.166168069 |
| MEIS1-AS2        | 1.662601902 | -3.67555121  | 3.077472174 | 0.00214553  | 0.015070502 | -2.026122328 | 3.165869751 |
| GNG11            | 1.659949915 | -1.401453223 | 2.648527876 | 0.008213993 | 0.040786269 | -3.225778661 | 3.160055539 |
| LYSMD1           | 1.658024763 | -0.273670325 | 5.221754429 | 2.16E-07    | 7.90E-06    | 6.576822607  | 3.155841531 |
| ATP2B2           | 1.658000075 | -2.721854325 | 2.866754191 | 0.004235651 | 0.025474418 | -2.637533496 | 3.155787527 |
| AGAP1            | 1.657495364 | 0.702670153  | 3.488705275 | 0.000506897 | 0.004940873 | -0.710721066 | 3.154683703 |
| RP11-229C3.2     | 1.657164932 | -2.303624622 | 3.70681031  | 0.00022162  | 0.00257808  | 0.052125879  | 3.153961243 |
| WLS              | 1.656511708 | -2.023330072 | 2.733925512 | 0.006370966 | 0.033979058 | -3.001041218 | 3.152533514 |
| TGM2             | 1.656063442 | 2.784087158  | 3.129578949 | 0.001802228 | 0.013163782 | -1.868373843 | 3.15155413  |
| RP11-550F7.1     | 1.652898362 | -2.151277433 | 3.850657226 | 0.000125428 | 0.001649067 | 0.579839169  | 3.144647619 |
| MTUS2-AS1        | 1.652360129 | -3.079094551 | 3.284406034 | 0.001058086 | 0.008836482 | -1.384348781 | 3.143474651 |
| PLEKHA4          | 1.651638282 | -0.540527436 | 4.168864029 | 3.33E-05    | 0.000563462 | 1.816282701  | 3.141902219 |
| SIAH2            | 1.650033762 | 5.974813809  | 6.996600538 | 4.85E-12    | 6.76E-10    | 16.85421251  | 3.138409835 |
| COL15A1          | 1.648939969 | -1.885350003 | 3.096025458 | 0.002016944 | 0.014345532 | -1.970251614 | 3.136031321 |
| C3orf27          | 1.646942945 | 1.028059095  | 3.23119232  | 0.001273725 | 0.010194331 | -1.553286708 | 3.131693331 |
| CD109            | 1.644802202 | 4.134345291  | 2.890676411 | 0.003928798 | 0.023968766 | -2.570264523 | 3.127049816 |
| IL15             | 1.643407487 | 0.638135482  | 3.419672129 | 0.000652753 | 0.006052493 | -0.942779491 | 3.124028222 |
| RP11-1021N1.1    | 1.642906673 | -1.738885938 | 2.705767623 | 0.006932724 | 0.036089926 | -3.075919429 | 3.122943944 |
| RP11-317F20.2    | 1.642001058 | -2.032248985 | 3.691683703 | 0.000235035 | 0.002703864 | -0.002233132 | 3.120984209 |
| CTDSPL           | 1.641608587 | 2.970410794  | 3.709632129 | 0.000219199 | 0.002555857 | 0.062290288  | 3.120135293 |
| FAM227A          | 1.640223679 | 0.449982099  | 4.62741061  | 4.20E-06    | 9.91E-05    | 3.764089443  | 3.117141571 |
| GZMB             | 1.637684265 | -0.110693476 | 3.202054529 | 0.001408358 | 0.010992972 | -1.644646446 | 3.111659643 |
| ZFYVE28          | 1.635277363 | 1.635301632  | 4.664123986 | 3.53E-06    | 8.61E-05    | 3.92845549   | 3.106472673 |
| RP11-649E7.5     | 1.635164194 | -1.692218439 | 5.994480286 | 2.86E-09    | 1.85E-07    | 10.71103803  | 3.106229001 |
| RP11-747H7.3     | 1.633192487 | -0.62640599  | 3.314653002 | 0.000951125 | 0.008122535 | -1.287120688 | 3.10198667  |
| PPP2R3A          | 1.631092211 | -1.745448066 | 2.735421383 | 0.006342304 | 0.033844661 | -2.997042004 | 3.097474082 |
| RP11-476E15.3    | 1.630908677 | -2.067206243 | 3.76666478  | 0.00017528  | 0.002139585 | 0.269336978  | 3.097080058 |
| RP11-307E17.8    | 1.630089321 | -2.129063881 | 2.690799054 | 0.007249149 | 0.037256861 | -3.115413416 | 3.09532162  |
| PCDHB14          | 1.628050752 | -2.558934922 | 2.757461981 | 0.005933254 | 0.032350865 | -2.937866773 | 3.090950931 |
| AKR1E2           | 1.628037542 | 2.004638188  | 3.913565317 | 9.72E-05    | 0.001350809 | 0.816745638  | 3.09092263  |
| BAG2             | 1.625997936 | 1.241097033  | 4.974724594 | 7.71E-07    | 2.32E-05    | 5.368565257  | 3.086555933 |
| GSTO2            | 1.623511738 | 0.162879409  | 5.876861068 | 5.72E-09    | 3.39E-07    | 10.04742326  | 3.081241449 |
| XXbac-BPG32J3.19 | 1.621797754 | -1.643732877 | 2.793144572 | 0.005321282 | 0.029917688 | -2.841074232 | 3.077582976 |

| gene         | logFC       | AveExpr      | t           | P.Value     | adj.P.Val   | B            | FoldChange  |
|--------------|-------------|--------------|-------------|-------------|-------------|--------------|-------------|
| RP3-523C21.1 | 1.62145754  | -3.286339207 | 3.401759131 | 0.000696533 | 0.006389565 | -1.002255303 | 3.076857309 |
| LINC00669    | 1.617249404 | -2.359939418 | 2.905109832 | 0.003753582 | 0.023166605 | -2.529412184 | 3.067895632 |
| ZDBF2        | 1.615454253 | 1.808966886  | 3.220966683 | 0.001319556 | 0.010481754 | -1.585440814 | 3.064080611 |
| RAG2         | 1.614585483 | -3.494639576 | 2.59001034  | 0.009739409 | 0.046050326 | -3.375718252 | 3.062236022 |
| RMND5A       | 1.61392029  | 7.197973731  | 10.7004056  | 2.37E-25    | 2.61E-22    | 46.63225755  | 3.060824422 |
| LRP2         | 1.613901503 | -2.268745081 | 3.083771847 | 0.002101049 | 0.014832608 | -2.007188632 | 3.060784564 |
| ITGB3        | 1.612229716 | 3.986277151  | 2.947420152 | 0.003280155 | 0.020936911 | -2.408505171 | 3.057239798 |
| WNK3         | 1.61162086  | -4.020766701 | 3.199907232 | 0.001418782 | 0.011064194 | -1.651347112 | 3.055949833 |
| CTB-58E17.1  | 1.610382688 | 1.884686551  | 6.119343937 | 1.36E-09    | 9.79E-08    | 11.42887315  | 3.053328233 |
| C16orf95     | 1.609386103 | 0.592994312  | 5.235739795 | 2.01E-07    | 7.41E-06    | 6.646883894  | 3.051219783 |
| TEAD1        | 1.606716409 | -2.857599063 | 2.943577067 | 0.003320791 | 0.02114094  | -2.419558174 | 3.045578751 |
| NBEA         | 1.605122276 | 1.983037167  | 3.552532871 | 0.000399674 | 0.004110365 | -0.492138457 | 3.042216359 |
| NIPA1        | 1.602766191 | 3.901188578  | 3.377580261 | 0.000759969 | 0.006847681 | -1.082051735 | 3.037251111 |
| FAM157A      | 1.600270379 | -2.116563516 | 2.753125027 | 0.006011809 | 0.032608463 | -2.949547697 | 3.032001314 |
| GPR156       | 1.599446217 | -2.221152611 | 4.136644362 | 3.83E-05    | 0.000628767 | 1.686774033  | 3.030269732 |
| ZNF354C      | 1.597920966 | 0.554499437  | 3.409425892 | 0.000677471 | 0.006251316 | -0.976836987 | 3.027067753 |
| TMEM132A     | 1.597818842 | -3.254916965 | 3.33578118  | 0.000882459 | 0.007671888 | -1.218687874 | 3.026853483 |
| DDHD2        | 1.59648168  | 5.887604897  | 11.73633541 | 7.37E-30    | 1.33E-26    | 56.75855165  | 3.024049343 |
| C5orf4       | 1.594383933 | 3.056347307  | 3.152841828 | 0.001665938 | 0.012426576 | -1.797109593 | 3.019655427 |
| EPB49        | 1.592445572 | 4.562987578  | 2.744858918 | 0.006164138 | 0.033207135 | -2.971761076 | 3.015601035 |
| ZC2HC1C      | 1.588894367 | -2.19645392  | 4.138511241 | 3.80E-05    | 0.000625319 | 1.694251584  | 3.008187238 |
| MYL9         | 1.587432373 | 0.096088481  | 3.114721153 | 0.001894569 | 0.013696691 | -1.913619046 | 3.005140353 |
| PTPRU        | 1.586504475 | -0.452063652 | 3.342132196 | 0.000862736 | 0.007553522 | -1.198034279 | 3.003208161 |
| MBOAT2       | 1.583595049 | 4.971190342  | 3.307528871 | 0.000975374 | 0.008300959 | -1.310099473 | 2.99715781  |
| RP11-1H8.2   | 1.582653672 | 3.040423422  | 8.364950798 | 2.05E-16    | 6.98E-14    | 26.60850353  | 2.995202765 |
| ARHGEF12     | 1.581961562 | 6.036998425  | 3.387549704 | 0.000733188 | 0.006645717 | -1.049217376 | 2.993766209 |
| ZNF311       | 1.581262604 | -2.107306631 | 2.993696738 | 0.00282522  | 0.018578472 | -2.274298348 | 2.992316138 |
| ITGB5        | 1.578531069 | 1.671958473  | 2.836375113 | 0.004656654 | 0.027172566 | -2.722166878 | 2.986655979 |
| PHLDB2       | 1.577968314 | 0.879583063  | 4.06997626  | 5.08E-05    | 0.000800853 | 1.42187893   | 2.985491195 |
| TMPRSS4      | 1.577334297 | -2.774785828 | 3.11331764  | 0.001903514 | 0.013751304 | -1.917882136 | 2.984179459 |
| RP11-87G24.6 | 1.576132328 | -3.201434094 | 2.719594733 | 0.006651527 | 0.035040941 | -3.039245404 | 2.98169425  |
| FAM127B      | 1.574432897 | 0.223586423  | 3.064628858 | 0.002238906 | 0.01557936  | -2.064605362 | 2.978184015 |
| LGR6         | 1.573429837 | -0.753135076 | 3.529754943 | 0.000435234 | 0.00439611  | -0.570586471 | 2.976114097 |
| NEIL1        | 1.572218126 | 2.15262643   | 3.528244903 | 0.000437693 | 0.004409693 | -0.575769726 | 2.973615527 |
| RP1-34B20.4  | 1.572139074 | -0.285617844 | 3.386243489 | 0.000736647 | 0.006674005 | -1.053524773 | 2.973452592 |
| CNN3         | 1.570493376 | -0.497713097 | 3.10224265  | 0.001975465 | 0.014135255 | -1.95145573  | 2.970062676 |
| CHIC1        | 1.568971278 | 0.904857113  | 3.607126001 | 0.000325202 | 0.003499057 | -0.302117259 | 2.966930799 |
| PRKG2        | 1.568717681 | -1.597684852 | 3.050953101 | 0.002342422 | 0.016062975 | -2.105409153 | 2.966409319 |
| ACSBG1       | 1.567412693 | -0.407455983 | 3.604209291 | 0.000328827 | 0.003526554 | -0.312340737 | 2.963727269 |
| WWC1         | 1.566911301 | -2.124131965 | 2.593823269 | 0.009632805 | 0.045708468 | -3.366048975 | 2.962697439 |
| CAPS2        | 1.566788824 | 0.5820366    | 4.450540135 | 9.55E-06    | 0.000198611 | 2.989678039  | 2.962445933 |
| KRT8P34      | 1.565920864 | -1.775968345 | 3.490065943 | 0.000504355 | 0.0049258   | -0.706101654 | 2.960664191 |
| AC084219.4   | 1.564747423 | -2.56854185  | 3.813534228 | 0.000145537 | 0.001845987 | 0.44178394   | 2.958257061 |
| F2R          | 1.563880488 | 3.480075491  | 3.862874964 | 0.000119405 | 0.00158668  | 0.625558908  | 2.956479939 |
| LY6G6F       | 1.563390553 | -1.540981002 | 2.690323688 | 0.007259407 | 0.037290722 | -3.116664113 | 2.955476099 |
| HIST1H2AJ    | 1.561484167 | 5.021598506  | 4.465308707 | 8.92E-06    | 0.000187419 | 3.053233684  | 2.951573292 |
| ANKRD16      | 1.560233911 | 2.30234685   | 7.706333186 | 3.16E-14    | 7.19E-12    | 21.72164634  | 2.949016534 |
| COL18A1      | 1.560202603 | 3.688104978  | 4.152015068 | 3.58E-05    | 0.000597513 | 1.748436463  | 2.948952537 |
| PSD3         | 1.559932218 | 3.318375129  | 2.860189319 | 0.004323585 | 0.025821295 | -2.655897732 | 2.948399907 |
| GBP7         | 1.55981649  | -2.571140122 | 2.989105025 | 0.002867633 | 0.018770046 | -2.287706515 | 2.948163406 |
| BNIP1        | 1.555367993 | -1.079059111 | 5.027239466 | 5.91E-07    | 1.83E-05    | 5.620776101  | 2.939086853 |
| TRBV26OR9-2  | 1.55427133  | -4.336669009 | 2.849632045 | 0.004468476 | 0.026464454 | -2.685343289 | 2.936853559 |
| ZNF483       | 1.554124094 | 0.285862304  | 3.522846178 | 0.000446592 | 0.004472018 | -0.594283316 | 2.93655385  |
| CAMK4        | 1.549796113 | 3.395439246  | 3.218193244 | 0.001332246 | 0.010557132 | -1.594144586 | 2.927757601 |
| RP3-430N8.8  | 1.549777595 | -2.313673795 | 3.024786773 | 0.002552811 | 0.017151232 | -2.182981559 | 2.927720022 |
| ACSM1        | 1.547721296 | -1.167848064 | 4.316591499 | 1.75E-05    | 0.00032792  | 2.422477711  | 2.923550062 |
| CEL          | 1.546985578 | 0.113826103  | 4.043614584 | 5.68E-05    | 0.000875299 | 1.318282285  | 2.922059547 |
| PCDHB9       | 1.545015313 | -3.625800074 | 2.684594995 | 0.007384061 | 0.037715129 | -3.131719316 | 2.918071662 |
| GIT1         | 1.544653664 | 5.464409111  | 9.355787599 | 5.46E-20    | 3.27E-17    | 34.60572154  | 2.917340262 |
| ZNF286B      | 1.544569831 | 0.533419149  | 4.580859545 | 5.23E-06    | 0.000119265 | 3.55746711   | 2.917170744 |

| gene           | logFC       | AveExpr      | t           | P.Value     | adj.P.Val   | B            | FoldChange  |
|----------------|-------------|--------------|-------------|-------------|-------------|--------------|-------------|
| SLIT2          | 1.543361048 | -2.413717626 | 2.842231875 | 0.00457265  | 0.026899981 | -2.705919457 | 2.914727575 |
| AP000253.1     | 1.541407048 | -0.820869608 | 5.368584607 | 9.90E-08    | 4.01E-06    | 7.321201532  | 2.910782511 |
| CRB1           | 1.539711122 | -2.017768809 | 3.749712489 | 0.000187383 | 0.002251211 | 0.207474269  | 2.90736282  |
| FHDC1          | 1.537731871 | 3.08185286   | 2.769867376 | 0.005713642 | 0.031474341 | -2.904354811 | 2.903376908 |
| KCNJ2-AS1      | 1.533551913 | -3.232493868 | 2.899029515 | 0.003826509 | 0.023492131 | -2.546646282 | 2.894977054 |
| CTD-2335A18.1  | 1.53351155  | -0.418911856 | 2.76369252  | 0.00582202  | 0.031902606 | -2.921054089 | 2.894896061 |
| ADRA2A         | 1.531166826 | -0.936305382 | 2.63342959  | 0.008585567 | 0.042052883 | -3.264781131 | 2.890194984 |
| CMTM8          | 1.531084479 | -1.096637116 | 3.375218977 | 0.000766444 | 0.006896601 | -1.08981478  | 2.89003002  |
| C17orf99       | 1.530863616 | -0.547445514 | 2.913712254 | 0.003652566 | 0.02270604  | -2.5049688   | 2.889587617 |
| GP1BB          | 1.530424853 | 3.46097904   | 3.441356093 | 0.000603187 | 0.005686169 | -0.870375195 | 2.888708948 |
| RP11-815I9.4   | 1.530026533 | -0.064887563 | 4.477780296 | 8.43E-06    | 0.000178332 | 3.107061742  | 2.887911502 |
| ARHGAP21       | 1.52875952  | 4.635236339  | 3.032222584 | 0.002491328 | 0.016824545 | -2.16100411  | 2.885376377 |
| SLFN13         | 1.521866394 | 4.507140562  | 4.651329167 | 3.75E-06    | 9.02E-05    | 3.871031988  | 2.871623072 |
| SLC2A1-AS1     | 1.521009396 | 0.006048467  | 3.136662931 | 0.001759676 | 0.012941762 | -1.846727303 | 2.869917761 |
| DPEP3          | 1.518555277 | -0.44291518  | 3.236996804 | 0.001248369 | 0.010041247 | -1.534990365 | 2.865039992 |
| RP11-1070N10.6 | 1.517383546 | -1.97664182  | 2.922922978 | 0.003547156 | 0.022211261 | -2.47871823  | 2.862714003 |
| B3GNT4         | 1.517104242 | -3.09366997  | 3.005552545 | 0.002718349 | 0.017995306 | -2.239585024 | 2.862159839 |
| KIAA1377       | 1.516388096 | -1.317034138 | 3.226439954 | 0.001294838 | 0.0103144   | -1.56824274  | 2.86073943  |
| ICOS           | 1.513333718 | 1.27225838   | 3.030110144 | 0.002508656 | 0.016912698 | -2.167253071 | 2.854689269 |
| ACVR2B         | 1.512067987 | 1.052926069  | 3.590993172 | 0.000345731 | 0.003662196 | -0.358564194 | 2.852185842 |
| RP11-509J21.3  | 1.509687686 | -1.241171277 | 4.65748332  | 3.64E-06    | 8.83E-05    | 3.898633173  | 2.847483903 |
| ESPNL          | 1.509628445 | -1.687481562 | 3.132403872 | 0.001785147 | 0.013082482 | -1.859747468 | 2.847366979 |
| RP11-925D8.4   | 1.509247354 | -2.814241602 | 2.670939906 | 0.007688977 | 0.038795176 | -3.16747785  | 2.846614941 |
| C15orf48       | 1.506998231 | -0.434731106 | 2.860162828 | 0.004323943 | 0.025821295 | -2.655971751 | 2.842180601 |
| DMRTA2         | 1.505639048 | -2.975350787 | 2.908219562 | 0.003716776 | 0.023018417 | -2.520584225 | 2.839504205 |
| PER3           | 1.504852189 | 1.707895829  | 3.884598214 | 0.000109365 | 0.001480165 | 0.707195795  | 2.837955935 |
| PLS1           | 1.504019176 | 0.412966005  | 2.956631197 | 0.003184599 | 0.020465625 | -2.381955857 | 2.836317772 |
| AP001347.6     | 1.503901522 | -1.066030376 | 3.504831379 | 0.000477523 | 0.004703205 | -0.655860653 | 2.836086474 |
| AMMECR1        | 1.503626264 | 3.944011065  | 5.017370438 | 6.22E-07    | 1.90E-05    | 5.573186697  | 2.835545416 |
| EIF5AP2        | 1.502412303 | -2.926782838 | 3.071994611 | 0.002184908 | 0.015296847 | -2.04255431  | 2.83316044  |
| SYNGR3         | 1.501783068 | -0.827085359 | 3.797909244 | 0.000154879 | 0.001943303 | 0.384064864  | 2.83192502  |
| DNALI1         | 1.500829327 | -2.381512056 | 3.133202432 | 0.001780345 | 0.013056966 | -1.857307551 | 2.830053502 |
| CPNE5          | 1.500342586 | 0.213256649  | 3.907999436 | 9.94E-05    | 0.001377138 | 0.79563499   | 2.829098851 |
| CFL1P1         | 1.499902046 | -0.650453013 | 6.244799803 | 6.31E-10    | 4.99E-08    | 12.16389332  | 2.828235091 |
| HIST1H2BM      | 1.499067694 | 2.681120458  | 3.766328268 | 0.000175513 | 0.002141107 | 0.268106335  | 2.826599915 |
| ARMCX1         | 1.498975303 | 1.820741967  | 4.110235004 | 4.28E-05    | 0.00069401  | 1.581343542  | 2.826418902 |
| KLF8           | 1.496350248 | 1.122156277  | 3.682835386 | 0.000243233 | 0.002783599 | -0.03393029  | 2.821280769 |
| ATP13A4        | 1.495022093 | -0.147954505 | 3.785393449 | 0.000162767 | 0.00202303  | 0.337997118  | 2.818684675 |
| LTA            | 1.493227903 | -0.36760783  | 3.504243552 | 0.000478565 | 0.004711125 | -0.657864748 | 2.815181431 |
| GTF3C5         | 1.49263934  | 5.931689283  | 8.17988597  | 8.73E-16    | 2.62E-13    | 25.20004291  | 2.814033182 |
| TRIM32         | 1.49188453  | 1.392411306  | 3.117584285 | 0.001876443 | 0.013595454 | -1.904916603 | 2.81256128  |
| GRIK4          | 1.491576688 | -3.510502242 | 3.063373055 | 0.002248234 | 0.0156255   | -2.068359713 | 2.8119612   |
| KCNK5          | 1.490260941 | 3.714583046  | 3.242712308 | 0.001223858 | 0.009868165 | -1.516943098 | 2.809397842 |
| BHLHB9         | 1.488323779 | 0.201797605  | 4.900066125 | 1.12E-06    | 3.21E-05    | 5.014339749  | 2.805628088 |
| RP11-68I3.4    | 1.487930369 | -0.601756445 | 5.592996568 | 2.89E-08    | 1.37E-06    | 8.496402225  | 2.804863122 |
| LEPREL1        | 1.485935213 | -2.611681085 | 2.695824162 | 0.007141503 | 0.036866404 | -3.102178927 | 2.800986856 |
| SLC2A1         | 1.485792168 | 6.357252539  | 4.085609354 | 4.75E-05    | 0.00075687  | 1.483621434  | 2.800709147 |
| ARL5B          | 1.481569381 | 6.323351445  | 5.811128753 | 8.38E-09    | 4.70E-07    | 9.681890374  | 2.792523421 |
| MB21D2         | 1.480906378 | -1.642409625 | 2.833421874 | 0.004699541 | 0.027341904 | -2.730347049 | 2.791240388 |
| PHTF1          | 1.478554781 | 5.926858687  | 6.664706394 | 4.41E-11    | 4.83E-09    | 14.72366956  | 2.786694364 |
| CDHR3          | 1.477245683 | -1.588475164 | 3.46354652  | 0.000556113 | 0.005323569 | -0.795817475 | 2.784166872 |
| ALDH1L2        | 1.476689452 | -0.832101595 | 2.872049077 | 0.004165916 | 0.025116081 | -2.622691702 | 2.783093642 |
| TDH            | 1.475606885 | -2.441324104 | 3.56856732  | 0.000376292 | 0.003920845 | -0.436620404 | 2.781006054 |
| LINC00656      | 1.474877768 | -2.365840209 | 2.991699524 | 0.002843597 | 0.018662106 | -2.280132855 | 2.77960093  |
| FASLG          | 1.47335233  | -2.22487926  | 3.390227455 | 0.000726146 | 0.006606095 | -1.040382101 | 2.776663462 |
| RP11-136K14.2  | 1.472391922 | -2.726164496 | 3.183567553 | 0.001500469 | 0.011521062 | -1.702191104 | 2.774815642 |
| YPEL4          | 1.472123791 | 2.503316544  | 2.813074154 | 0.005004896 | 0.028645154 | -2.786480315 | 2.774299979 |
| TNIK           | 1.471265576 | 4.009433659  | 3.728351091 | 0.000203755 | 0.00240986  | 0.129907733  | 2.772650122 |
| RBM11          | 1.469750043 | -2.144612915 | 3.348036803 | 0.000844768 | 0.007421732 | -1.178797976 | 2.769739017 |
| LMCD1          | 1.465807804 | -2.112667441 | 2.776554757 | 0.005598326 | 0.031022338 | -2.886228086 | 2.762180894 |

| gene           | logFC       | AveExpr      | t           | P.Value     | adj.P.Val   | B            | FoldChange  |
|----------------|-------------|--------------|-------------|-------------|-------------|--------------|-------------|
| ABCC4          | 1.465745472 | 5.43383606   | 4.634506352 | 4.06E-06    | 9.64E-05    | 3.795760286  | 2.762061555 |
| C12orf55       | 1.465667188 | -1.90970267  | 4.148468401 | 3.64E-05    | 0.000603711 | 1.734188765  | 2.761911683 |
| GRHL1          | 1.464857289 | 0.616825168  | 3.337703946 | 0.000876444 | 0.007637409 | -1.212439064 | 2.760361638 |
| LA16c-349E10.1 | 1.463651074 | -0.8879041   | 2.604071134 | 0.009351434 | 0.044781419 | -3.339991719 | 2.758054708 |
| KHDRBS2        | 1.460252772 | -1.233478646 | 2.970436818 | 0.00304613  | 0.019690878 | -2.342011095 | 2.751565691 |
| FAM22D         | 1.460140287 | 0.739639707  | 5.530255207 | 4.10E-08    | 1.86E-06    | 8.163287104  | 2.751351163 |
| NPL            | 1.459921373 | 2.714679534  | 3.399049686 | 0.000703388 | 0.006437528 | -1.01122481  | 2.750933706 |
| SH2D1B         | 1.458438706 | -1.412901522 | 2.830959126 | 0.004735578 | 0.027470797 | -2.737162199 | 2.748108006 |
| LA16c-329F2.1  | 1.457115619 | -4.178896335 | 2.88862201  | 0.003954334 | 0.024090027 | -2.576063042 | 2.745588888 |
| SFRP1          | 1.456941313 | -3.50978288  | 2.554319492 | 0.010789485 | 0.049765506 | -3.465546965 | 2.745257187 |
| RP11-214C8.2   | 1.455548699 | -0.515786963 | 3.962578558 | 7.95E-05    | 0.00115004  | 1.003902633  | 2.742608505 |
| ZCCHC2         | 1.453237072 | 6.342862458  | 6.129029644 | 1.28E-09    | 9.31E-08    | 11.4851285   | 2.738217549 |
| CLCN3          | 1.452399335 | 5.105302424  | 5.565443472 | 3.37E-08    | 1.57E-06    | 8.349679469  | 2.736627995 |
| ZFP37          | 1.450989394 | -3.314031224 | 3.036772387 | 0.002454381 | 0.016688948 | -2.147530504 | 2.733954806 |
| MT1F           | 1.450717929 | -0.29626081  | 2.791211697 | 0.00535291  | 0.03003712  | -2.846348718 | 2.733440418 |
| PON2           | 1.449772904 | 2.358169675  | 2.601222505 | 0.009428901 | 0.045025903 | -3.347245097 | 2.731650489 |
| RP11-382A20.4  | 1.449556533 | -2.978104052 | 2.936218807 | 0.00339988  | 0.021506849 | -2.440681556 | 2.731240835 |
| DUSP4          | 1.449532985 | 1.81005045   | 2.664419695 | 0.00783852  | 0.039405692 | -3.184488924 | 2.731196254 |
| RP11-147K16.2  | 1.449115139 | -3.394488757 | 3.083647678 | 0.002101917 | 0.014832608 | -2.00756219  | 2.730405336 |
| SNED1          | 1.448784099 | 2.552850895  | 3.163676318 | 0.001605761 | 0.01208566  | -1.763742396 | 2.72977889  |
| RPS6KL1        | 1.447108447 | 2.549661561  | 2.732036865 | 0.006407321 | 0.034090253 | -3.006087442 | 2.726610165 |
| MIR4732        | 1.446640736 | -2.784702834 | 2.604577719 | 0.009337717 | 0.044748223 | -3.338700996 | 2.725726361 |
| NUDT10         | 1.445828953 | -3.852007584 | 2.691435476 | 0.007235436 | 0.037215381 | -3.113738634 | 2.724193067 |
| PAIP2B         | 1.445278172 | 1.131132548  | 3.442245461 | 0.000601231 | 0.005673136 | -0.867395998 | 2.723153245 |
| FAM211A        | 1.443892524 | 1.307372152  | 3.286122294 | 0.00105173  | 0.008791969 | -1.378855228 | 2.720539026 |
| NBPF12         | 1.443786158 | 3.027916902  | 10.10438488 | 6.64E-23    | 5.98E-20    | 41.1401594   | 2.720338455 |
| AC009469.1     | 1.441599292 | 3.198672491  | 3.039354927 | 0.002433633 | 0.016574921 | -2.139873855 | 2.716218035 |
| NBPF24         | 1.441314687 | -0.95118127  | 7.803879974 | 1.53E-14    | 3.70E-12    | 22.42324753  | 2.715682251 |
| AKR1CL1        | 1.441222744 | -2.530007217 | 3.219267992 | 0.001327315 | 0.010524182 | -1.590772619 | 2.715509186 |
| CCDC132        | 1.440562138 | 4.023748498  | 6.679208803 | 4.02E-11    | 4.44E-09    | 14.81479789  | 2.714266048 |
| PIM1           | 1.43976761  | 6.916092889  | 4.255336026 | 2.29E-05    | 0.00041067  | 2.16865025   | 2.712771644 |
| ZNRF2P2        | 1.439705186 | 0.280517309  | 4.94622925  | 8.90E-07    | 2.62E-05    | 5.232765019  | 2.712654268 |
| VASH2          | 1.439355734 | -1.123711358 | 2.652435538 | 0.008120203 | 0.040451775 | -3.215648438 | 2.711997284 |
| C1orf116       | 1.438365317 | 1.512818894  | 2.831109683 | 0.004733368 | 0.027466028 | -2.736745729 | 2.710136124 |
| RP3-508I15.14  | 1.436769974 | 1.104994818  | 4.446962325 | 9.70E-06    | 0.000201034 | 2.974311562  | 2.707140893 |
| CRABP2         | 1.433419424 | -0.062744168 | 3.801301439 | 0.000152804 | 0.001923366 | 0.396576169  | 2.700861057 |
| CECR7          | 1.432580077 | -2.362056788 | 2.688866303 | 0.007290939 | 0.037403631 | -3.120497169 | 2.699290177 |
| PLD6           | 1.431625682 | 1.797400586  | 4.896536879 | 1.14E-06    | 3.26E-05    | 4.997720957  | 2.697505089 |
| AKAP5          | 1.4316198   | -1.404108164 | 3.965839799 | 7.84E-05    | 0.001136334 | 1.0164357    | 2.697494093 |
| RP13-228J13.6  | 1.429913533 | -1.733953739 | 3.011311724 | 0.002667781 | 0.017743657 | -2.222673785 | 2.694305668 |
| MUC1           | 1.425546091 | 2.253007419  | 5.192847426 | 2.52E-07    | 8.97E-06    | 6.43257117   | 2.686161584 |
| RP11-548K23.11 | 1.424850381 | 3.293608756  | 3.551804417 | 0.000400767 | 0.004119473 | -0.494654887 | 2.68486655  |
| RASSF6         | 1.423697222 | -3.021199423 | 2.910671375 | 0.003687988 | 0.022890282 | -2.513617431 | 2.682721368 |
| C3             | 1.421612457 | 0.865522857  | 2.88436054  | 0.004007785 | 0.024370632 | -2.588078058 | 2.678847505 |
| SPATA22        | 1.418315698 | -3.339710817 | 3.001739583 | 0.002752309 | 0.018159368 | -2.250763915 | 2.672732955 |
| GH1            | 1.417093671 | -2.368067905 | 3.269061932 | 0.001116511 | 0.009212843 | -1.433338757 | 2.670469988 |
| KLRC1          | 1.416053332 | -2.162052849 | 3.262302015 | 0.001143186 | 0.009370432 | -1.454850321 | 2.668544985 |
| AC007255.7     | 1.415938983 | 1.335376496  | 4.6980178   | 3.00E-06    | 7.48E-05    | 4.081300499  | 2.668333483 |
| TC2N           | 1.414153527 | 3.404301415  | 3.366320069 | 0.00079131  | 0.007059352 | -1.119023511 | 2.66503324  |
| CTH            | 1.412109986 | 1.246859717  | 4.013836612 | 6.43E-05    | 0.000968771 | 1.202043073  | 2.66126096  |
| C14orf45       | 1.410420298 | 1.546269411  | 4.734018875 | 2.52E-06    | 6.44E-05    | 4.244805948  | 2.658145908 |
| SMIM1          | 1.409281941 | 0.106991877  | 3.399974673 | 0.00070104  | 0.006421985 | -1.008163463 | 2.65604933  |
| SQLE           | 1.409030133 | 4.320247925  | 6.000813226 | 2.76E-09    | 1.80E-07    | 10.7471154   | 2.655585783 |
| SLC25A27       | 1.407146558 | -2.646770955 | 2.842091916 | 0.004574642 | 0.026899981 | -2.706308104 | 2.652120926 |
| RP11-634B7.4   | 1.406308893 | -2.75989479  | 2.646592121 | 0.008260813 | 0.040966595 | -3.230791458 | 2.650581484 |
| UBASH3A        | 1.405629995 | 1.242659544  | 3.457767258 | 0.000568032 | 0.005421922 | -0.815280271 | 2.649334478 |
| ARHGAP5        | 1.40515254  | 4.991016797  | 2.884013822 | 0.004012162 | 0.024389756 | -2.589054847 | 2.648457835 |
| AC004017.1     | 1.404966238 | -0.860726749 | 2.655141436 | 0.00805582  | 0.040212037 | -3.208625042 | 2.648115848 |
| ABCB9          | 1.403923596 | 2.638825597  | 7.092835534 | 2.51E-12    | 3.65E-10    | 17.48948863  | 2.646202735 |
| RP11-290H9.2   | 1.403695537 | 3.406646244  | 2.864975276 | 0.004259317 | 0.025570119 | -2.642513831 | 2.645784461 |



| gene          | logFC       | AveExpr      | t           | P.Value     | adj.P.Val   | B            | FoldChange  |
|---------------|-------------|--------------|-------------|-------------|-------------|--------------|-------------|
| RAB36         | 1.333950013 | -1.452895627 | 2.86181945  | 0.004301597 | 0.025745403 | -2.651341551 | 2.520919435 |
| ACO05532.5    | 1.333763733 | -2.451243058 | 3.510825099 | 0.000467016 | 0.004625856 | -0.635407362 | 2.520593957 |
| RP5-1071N3.1  | 1.328052912 | -0.773120678 | 3.003809455 | 0.002733826 | 0.01806754  | -2.244697165 | 2.51063606  |
| KLRC4         | 1.32298722  | -0.039837427 | 3.034937649 | 0.00246922  | 0.016726882 | -2.15296621  | 2.501835997 |
| SLC22A1       | 1.322878389 | -1.330444602 | 2.600679524 | 0.009443732 | 0.045070701 | -3.348626786 | 2.501647276 |
| ZNF829        | 1.320590238 | 1.205692274  | 4.497719059 | 7.69E-06    | 0.000165183 | 3.193417688  | 2.497682746 |
| GP6           | 1.319149534 | -0.149553261 | 2.739640814 | 0.006262082 | 0.033570256 | -2.985749741 | 2.495189754 |
| POU2AF1       | 1.318482443 | 2.107671799  | 3.173132183 | 0.001554886 | 0.011828731 | -1.734529351 | 2.494036265 |
| RP3-508I15.19 | 1.317137304 | 1.781815237  | 4.676300324 | 3.33E-06    | 8.20E-05    | 3.983243262  | 2.491711196 |
| RP11-68L18.1  | 1.31675407  | -0.932822921 | 3.181354048 | 0.001511863 | 0.011595049 | -1.709059238 | 2.491050156 |
| RP11-284N8.3  | 1.31560053  | 1.992533255  | 3.056475919 | 0.002300101 | 0.015874468 | -2.088952497 | 2.489059176 |
| TREML2        | 1.312270748 | 3.506600991  | 3.971895182 | 7.65E-05    | 0.001109897 | 1.039733225  | 2.483320979 |
| SLC16A10      | 1.311521112 | 0.209865643  | 3.084919626 | 0.002093036 | 0.014796321 | -2.003734889 | 2.482030962 |
| VPREB3        | 1.310811845 | -1.186921822 | 2.972384982 | 0.003027039 | 0.019593074 | -2.336359625 | 2.480811029 |
| ATP7B         | 1.310805819 | 2.489244324  | 2.751339618 | 0.006044421 | 0.032740474 | -2.954351167 | 2.480800668 |
| CR2           | 1.308765195 | -0.102119008 | 3.088411902 | 0.002068829 | 0.014661862 | -1.993218645 | 2.477294171 |
| CCDC114       | 1.308022202 | 0.276161731  | 4.962972412 | 8.18E-07    | 2.44E-05    | 5.31246807   | 2.476018685 |
| GIPC2         | 1.307345095 | -0.905747776 | 5.931703289 | 4.15E-09    | 2.56E-07    | 10.35532524  | 2.474856877 |
| FAM46C        | 1.30390441  | 7.347266963  | 2.672372682 | 0.007656461 | 0.038677822 | -3.16373428  | 2.46896162  |
| MGAT2         | 1.302133984 | 4.837283186  | 7.458603523 | 1.92E-13    | 3.62E-11    | 19.97503516  | 2.465933653 |
| ACSM3         | 1.301267655 | 4.620614197  | 3.163738724 | 0.001605421 | 0.01208566  | -1.763549877 | 2.46445332  |
| RP11-230B22.1 | 1.301227711 | -1.292115955 | 3.142989954 | 0.001722455 | 0.012736251 | -1.827353262 | 2.464385087 |
| MPC2          | 1.30086541  | 5.010478903  | 8.365120466 | 2.04E-16    | 6.98E-14    | 26.60980734  | 2.46376629  |
| REXO2         | 1.299460333 | 3.429613623  | 5.205313669 | 2.36E-07    | 8.48E-06    | 6.494687247  | 2.461367934 |
| WDR66         | 1.299358116 | 1.100659638  | 4.641992707 | 3.92E-06    | 9.38E-05    | 3.829224886  | 2.461193548 |
| RAPGEF2       | 1.299287594 | 6.931463907  | 5.34910235  | 1.10E-07    | 4.39E-06    | 7.221313108  | 2.461073243 |
| LHFPL2        | 1.298708941 | 4.13179033   | 3.241563877 | 0.001228747 | 0.009899517 | -1.520571882 | 2.460086324 |
| IL2RB         | 1.298161411 | 2.21077326   | 3.223334062 | 0.001308812 | 0.010400585 | -1.578005559 | 2.459152853 |
| MYOM1         | 1.297583482 | 1.949067364  | 4.12384081  | 4.04E-05    | 0.000658132 | 1.63557874   | 2.458167939 |
| SNX22         | 1.294822266 | 1.834390129  | 3.13218761  | 0.001786449 | 0.01308518  | -1.86040813  | 2.45346768  |
| H1FX-AS1      | 1.29279068  | 1.270225841  | 6.429313701 | 2.00E-10    | 1.79E-08    | 13.26988144  | 2.450015166 |
| NELL2         | 1.292444045 | 2.587244834  | 2.771712544 | 0.005681612 | 0.031332791 | -2.89935762  | 2.449426573 |
| TXNDC16       | 1.291253398 | 3.730141579  | 6.8254454   | 1.53E-11    | 1.88E-09    | 15.74377219  | 2.447405913 |
| CTTN          | 1.290461215 | 1.377028826  | 2.64079745  | 0.008402402 | 0.041501567 | -3.24577565  | 2.446062411 |
| XKR6          | 1.290459309 | -0.307851524 | 2.976124461 | 0.002990701 | 0.019427772 | -2.325501501 | 2.446059181 |
| FRRS1         | 1.284228532 | 3.868465378  | 4.742266844 | 2.43E-06    | 6.22E-05    | 4.282433389  | 2.435517807 |
| GPR15         | 1.281697753 | -2.338530322 | 2.772618949 | 0.005665937 | 0.031281222 | -2.896901643 | 2.431249162 |
| RP1-34L19.1   | 1.280444346 | -0.502165788 | 2.753762929 | 0.006000196 | 0.0326004   | -2.947830743 | 2.429137821 |
| RAB30         | 1.280283314 | 3.394497069  | 3.323964314 | 0.000920274 | 0.007910283 | -1.257014322 | 2.428866699 |
| UBA52P6       | 1.279674363 | -0.883957712 | 3.02904728  | 0.002517415 | 0.01694289  | -2.170395588 | 2.427841709 |
| CTD-2666L21.1 | 1.278889733 | -0.49770228  | 4.281274673 | 2.04E-05    | 0.000375577 | 2.275707226  | 2.426521652 |
| RP11-66D17.5  | 1.27887574  | -0.547290435 | 4.04705113  | 5.59E-05    | 0.000864108 | 1.331750408  | 2.426498116 |
| DNAH11        | 1.278481375 | -2.399248123 | 3.425159811 | 0.000639862 | 0.005955296 | -0.924497946 | 2.425834916 |
| GLB1L3        | 1.276769122 | -2.484557967 | 2.937801086 | 0.00338273  | 0.021425758 | -2.436143687 | 2.422957538 |
| RP11-147L13.8 | 1.276725039 | -0.912835936 | 3.167968037 | 0.001582483 | 0.011979057 | -1.750494097 | 2.422883503 |
| SGMS1         | 1.275832814 | 4.094759633  | 5.250028464 | 1.86E-07    | 6.92E-06    | 6.718647447  | 2.42138555  |
| EPHA4         | 1.275597752 | 1.328837541  | 2.919210995 | 0.003589299 | 0.022432553 | -2.489307176 | 2.42099106  |
| SLC16A14      | 1.275476819 | -0.528616693 | 2.5562652   | 0.010729741 | 0.049628186 | -3.460681588 | 2.420788131 |
| DCST1         | 1.275416316 | -0.944261719 | 2.846232835 | 0.004516057 | 0.026650531 | -2.694801323 | 2.420686611 |
| DNAAF2        | 1.273789938 | 3.242236546  | 6.577119254 | 7.78E-11    | 7.86E-09    | 14.1771455   | 2.417959262 |
| RP5-882C2.2   | 1.273301163 | 2.287158348  | 5.887183335 | 5.39E-09    | 3.20E-07    | 10.10517251  | 2.417140213 |
| TIAM1         | 1.273259113 | 2.505769084  | 2.79398389  | 0.005307601 | 0.029852616 | -2.838782758 | 2.417069761 |
| NUDT12        | 1.273157539 | 0.132143357  | 2.763336819 | 0.005828319 | 0.031919445 | -2.92201493  | 2.416899592 |
| GPR146        | 1.272206842 | 1.894069987  | 2.988776297 | 0.002870691 | 0.018777765 | -2.288665651 | 2.415307445 |
| RP1-80N2.3    | 1.271748842 | -1.567215748 | 2.718427604 | 0.00667486  | 0.03511711  | -3.042348129 | 2.4145408   |
| CTC-471J1.2   | 1.271690158 | -1.289065498 | 3.211932763 | 0.001361309 | 0.01075397  | -1.613764618 | 2.414442587 |
| SLC26A1       | 1.270141131 | -1.882309201 | 3.54817769  | 0.000406255 | 0.004160753 | -0.507175872 | 2.411851582 |
| HIST1H3F      | 1.267802099 | 5.153024081  | 3.156741052 | 0.001644046 | 0.012317583 | -1.785113991 | 2.407944432 |
| CATSPERB      | 1.267665379 | -1.258148104 | 2.805946508 | 0.005116037 | 0.029114476 | -2.806049233 | 2.407716248 |
| RP11-420G6.3  | 1.267074947 | -1.170215413 | 3.83163717  | 0.000135378 | 0.001750045 | 0.508944175  | 2.406731076 |

| gene          | logFC       | AveExpr      | t           | P.Value     | adj.P.Val   | B            | FoldChange  |
|---------------|-------------|--------------|-------------|-------------|-------------|--------------|-------------|
| PTPLA         | 1.267045149 | 2.373996936  | 3.636873029 | 0.000290311 | 0.003186009 | -0.197390117 | 2.406681368 |
| CDC14B        | 1.266031866 | 0.131296154  | 2.612793529 | 0.009117757 | 0.043917493 | -3.317733464 | 2.404991619 |
| RP3-453I5.2   | 1.265856538 | -1.231915716 | 2.795247591 | 0.005287063 | 0.029779422 | -2.835331371 | 2.404699362 |
| RP11-659G9.3  | 1.265274362 | -2.306409482 | 3.14274649  | 0.001723873 | 0.01274198  | -1.828099486 | 2.403729181 |
| IZUMO1        | 1.264712212 | -3.325572553 | 2.69532285  | 0.007152177 | 0.036902251 | -3.103500312 | 2.402792744 |
| RP11-104L21.2 | 1.264006974 | -1.032212119 | 2.684017705 | 0.007396728 | 0.037728464 | -3.133234701 | 2.401618464 |
| MICAL2        | 1.262158859 | 5.876295372  | 3.672688681 | 0.000252963 | 0.002861773 | -0.070187602 | 2.398543923 |
| APOLD1        | 1.261754828 | 1.889502838  | 4.76093675  | 2.22E-06    | 5.77E-05    | 4.367836866  | 2.397872297 |
| RP11-671M22.5 | 1.261178416 | 0.398926686  | 3.27837383  | 0.001080708 | 0.008976675 | -1.403634902 | 2.396914447 |
| HOMER1        | 1.2609276   | 1.406041583  | 3.039335116 | 0.002433792 | 0.016574921 | -2.139932615 | 2.396497774 |
| GCLM          | 1.260218892 | 3.618108232  | 4.073867487 | 5.00E-05    | 0.000790321 | 1.437225853  | 2.395320809 |
| AC012309.5    | 1.256863259 | -1.782541298 | 2.742482968 | 0.006208562 | 0.03335564  | -2.978133758 | 2.389755894 |
| RP11-353N4.4  | 1.255030342 | -1.324988829 | 3.058424588 | 0.002252963 | 0.015806323 | -2.083138968 | 2.386721682 |
| MEX3B         | 1.253607425 | 3.590980307  | 2.847259411 | 0.00450164  | 0.026597176 | -2.691946128 | 2.38436884  |
| RP11-511B23.2 | 1.253590275 | -3.091218367 | 2.704532246 | 0.006958361 | 0.036199066 | -3.079187092 | 2.384340496 |
| RP3-508I15.18 | 1.251307447 | 1.055363661  | 4.245107302 | 2.39E-05    | 0.000426792 | 2.126605357  | 2.380570653 |
| TSTD3         | 1.250849128 | -1.492082898 | 3.605211988 | 0.000327576 | 0.003518534 | -0.308827053 | 2.379814507 |
| MAPK10        | 1.247634597 | -2.389105773 | 2.592452653 | 0.009671005 | 0.045812825 | -3.369526359 | 2.374517842 |
| AC007036.4    | 1.245103493 | 1.02225964   | 3.829276329 | 0.000136664 | 0.001759385 | 0.500168177  | 2.370355575 |
| UROD          | 1.243576808 | 5.209923063  | 5.077509781 | 4.57E-07    | 1.48E-05    | 5.864561106  | 2.367848551 |
| RP11-571M6.6  | 1.242651952 | -1.620038878 | 3.059394178 | 0.002278023 | 0.015777122 | -2.080245004 | 2.3663311   |
| TDRKH         | 1.241041687 | 0.81052137   | 3.151298347 | 0.001674678 | 0.012480926 | -1.801853958 | 2.363691393 |
| RP11-820K3.2  | 1.240074238 | -1.781783184 | 3.202549008 | 0.001405968 | 0.010982979 | -1.643102796 | 2.362106868 |
| SLC16A1       | 1.239821424 | 3.745469492  | 3.033304278 | 0.002482499 | 0.016787833 | -2.157802622 | 2.361692975 |
| HCN2          | 1.239129398 | -0.040521699 | 3.485274923 | 0.00051336  | 0.004994024 | -0.722359178 | 2.3605604   |
| SKA2          | 1.238795689 | 3.183482718  | 4.882756676 | 1.22E-06    | 3.47E-05    | 4.932940756  | 2.360014443 |
| ZNF252P-AS1   | 1.237756227 | -1.141908306 | 3.548840534 | 0.000405247 | 0.00415892  | -0.504888389 | 2.358314665 |
| HMGNS         | 1.23722408  | -0.869653584 | 3.632764305 | 0.000294912 | 0.003229341 | -0.211905077 | 2.357444947 |
| C19orf57      | 1.237039407 | 0.463785606  | 3.369114177 | 0.000783423 | 0.007002468 | -1.109860572 | 2.357143199 |
| EXOC8         | 1.235620699 | 5.635694131  | 10.57237111 | 8.13E-25    | 7.66E-22    | 45.4313659   | 2.354826387 |
| RP11-80H8.4   | 1.235396896 | -1.454088562 | 3.126771737 | 0.001819351 | 0.013269258 | -1.876938579 | 2.354461114 |
| AP000275.65   | 1.235183415 | 2.454704706  | 5.514724036 | 4.47E-08    | 2.01E-06    | 8.0813714    | 2.354112741 |
| ADPRHL1       | 1.234956407 | -0.531533201 | 3.756908866 | 0.000182152 | 0.00220443  | 0.233702355  | 2.353742351 |
| MIER3         | 1.233059137 | 5.184968649  | 5.85134961  | 6.64E-09    | 3.85E-07    | 9.905100986  | 2.350649009 |
| DBN1          | 1.233013585 | 4.108855128  | 2.976868908 | 0.002983514 | 0.019387453 | -2.323338288 | 2.35057479  |
| C17orf110     | 1.231605254 | -1.226186045 | 3.904260295 | 0.00010097  | 0.001390716 | 0.781469271  | 2.348281325 |
| AC009542.2    | 1.230846203 | -3.023824518 | 2.601189777 | 0.009429794 | 0.045025903 | -3.347328386 | 2.347046139 |
| RP11-690G19.3 | 1.22954936  | 3.949119665  | 7.636103186 | 5.30E-14    | 1.15E-11    | 21.22135201  | 2.34493732  |
| CD6           | 1.225675427 | 4.408754676  | 2.708333641 | 0.006879745 | 0.035848308 | -3.069127422 | 2.338649127 |
| DMPK          | 1.22484095  | 2.087905421  | 3.581234727 | 0.000358732 | 0.003769639 | -0.392588304 | 2.337296808 |
| OPLAH         | 1.224522782 | 2.12816453   | 2.879473179 | 0.004069894 | 0.024634748 | -2.601836278 | 2.336781404 |
| CXCR3         | 1.223801237 | -0.141224222 | 2.866991432 | 0.004232504 | 0.02546323  | -2.636869077 | 2.335612984 |
| ZNF507        | 1.222676162 | 4.815291025  | 5.215172547 | 2.24E-07    | 8.13E-06    | 6.543911209  | 2.333792284 |
| sep-05        | 1.221187273 | 4.616013749  | 3.02381944  | 0.00256091  | 0.017183022 | -2.185836738 | 2.331385008 |
| DNAJA4        | 1.220327895 | 5.168326257  | 3.199194281 | 0.001422259 | 0.011083988 | -1.653570912 | 2.329996673 |
| TESPA1        | 1.219466169 | 4.668864112  | 3.635613762 | 0.000291714 | 0.003197862 | -0.201840447 | 2.328605375 |
| AL358813.2    | 1.219463366 | -0.904594806 | 2.795106443 | 0.005289353 | 0.029783844 | -2.835716945 | 2.328600851 |
| TMEM8B        | 1.2187382   | 1.793456608  | 3.259645905 | 0.001153828 | 0.009438112 | -1.463290737 | 2.327430681 |
| PANX1         | 1.218716999 | 3.51735132   | 5.343227702 | 1.14E-07    | 4.50E-06    | 7.191260074  | 2.327396478 |
| FBLN7         | 1.217266611 | -0.813885917 | 2.665089988 | 0.007823028 | 0.039337801 | -3.182742035 | 2.325057847 |
| USP1          | 1.217012077 | 5.559788626  | 7.911427315 | 6.83E-15    | 1.71E-12    | 23.20578324  | 2.324647675 |
| LINC00173     | 1.216845355 | 1.230458153  | 3.319768261 | 0.00093406  | 0.008007908 | -1.270591684 | 2.324379047 |
| CRAMP1L       | 1.214333056 | 7.036039991  | 7.533097579 | 1.12E-13    | 2.29E-11    | 20.49492422  | 2.320334913 |
| WI2-3658N16.1 | 1.21378561  | 2.158067659  | 5.977155072 | 3.17E-09    | 2.03E-07    | 10.6125208   | 2.319454603 |
| BCL11B        | 1.211954393 | 4.104256059  | 2.762903564 | 0.005836    | 0.031952667 | -2.9231851   | 2.316512381 |
| ZNF876P       | 1.211647796 | -0.434249508 | 3.141388493 | 0.001731807 | 0.012779354 | -1.832260728 | 2.316020136 |
| CD28          | 1.211304815 | 2.703441585  | 2.781945247 | 0.00550691  | 0.030599613 | -2.87158538  | 2.315469599 |
| ZNF563        | 1.210316984 | 0.563834513  | 3.749542107 | 0.000187508 | 0.002251352 | 0.206853881  | 2.313884711 |
| YAP1P1        | 1.209846287 | 0.144145694  | 2.698231039 | 0.007090455 | 0.036660752 | -3.095831387 | 2.313129901 |
| NLN           | 1.208598189 | 3.865622637  | 4.207099788 | 2.82E-05    | 0.000491778 | 1.971230824  | 2.311129641 |



| gene             | logFC       | AveExpr      | t           | P.Value     | adj.P.Val   | B            | FoldChange  |
|------------------|-------------|--------------|-------------|-------------|-------------|--------------|-------------|
| ASAP3            | 1.162452814 | -1.591265724 | 2.763855776 | 0.005819131 | 0.031895608 | -2.920613052 | 2.238376643 |
| DSCAML1          | 1.162417287 | -2.288633882 | 2.684726093 | 0.007381187 | 0.037710184 | -3.131375139 | 2.238321524 |
| GPR68            | 1.162195454 | -0.003698662 | 2.606548968 | 0.009284514 | 0.044547204 | -3.333676116 | 2.237977379 |
| C1orf109         | 1.161981495 | 3.032627396  | 4.913047464 | 1.05E-06    | 3.04E-05    | 5.075565326  | 2.237645501 |
| AC016735.2       | 1.161320221 | -2.438943852 | 2.57950103  | 0.010038706 | 0.047193127 | -3.402296376 | 2.236620088 |
| NME3             | 1.160464611 | 3.230622249  | 4.903360772 | 1.10E-06    | 3.17E-05    | 5.029864131  | 2.235294023 |
| IFIT3            | 1.160436457 | 3.87446829   | 2.61378456  | 0.00909154  | 0.043844578 | -3.315199855 | 2.235250402 |
| RSPH1            | 1.156182875 | -1.049579773 | 2.688493439 | 0.007299026 | 0.037425711 | -3.121477506 | 2.228669789 |
| ECE1             | 1.155220981 | 5.15806581   | 2.904844429 | 0.003756739 | 0.023178858 | -2.530165185 | 2.227184353 |
| KIAA1009         | 1.15456714  | 2.910960536  | 5.774550768 | 1.03E-08    | 5.64E-07    | 9.480142991  | 2.226175205 |
| RP11-649A18.5    | 1.153719121 | -0.392752505 | 5.07990962  | 4.52E-07    | 1.46E-05    | 5.876256603  | 2.224867038 |
| AC007036.5       | 1.153440644 | 3.130000854  | 3.784160692 | 0.000163564 | 0.002029664 | 0.333467612  | 2.224437623 |
| TTC8             | 1.152774691 | 2.142210264  | 2.976969008 | 0.002982549 | 0.019387453 | -2.323047378 | 2.223411053 |
| BCL2L1           | 1.152684987 | 6.062988989  | 3.346350763 | 0.000849863 | 0.007457309 | -1.184294217 | 2.223272809 |
| SPA17            | 1.152490008 | -0.253228839 | 3.54483173  | 0.000411381 | 0.004202369 | -0.518716481 | 2.222972356 |
| TAC3             | 1.150836884 | -2.881648023 | 2.613319943 | 0.009103823 | 0.043871734 | -3.16387785  | 2.220426603 |
| CCR4             | 1.150617939 | 0.576450089  | 2.808085413 | 0.005082453 | 0.028965006 | -2.800182009 | 2.220089656 |
| SRPK1            | 1.150169322 | 7.012000235  | 5.982548952 | 3.07E-09    | 1.97E-07    | 10.64316391  | 2.219399408 |
| sep-12           | 1.149904273 | -2.253925615 | 2.800230644 | 0.005206774 | 0.029444536 | -2.821706819 | 2.218991702 |
| DHDH             | 1.14858894  | -2.099418791 | 2.855242126 | 0.004390942 | 0.026146125 | -2.669709403 | 2.216969527 |
| ITK              | 1.14836617  | 4.027799362  | 2.595892539 | 0.009575388 | 0.045494411 | -3.360795604 | 2.216627225 |
| SSX2IP           | 1.148242761 | 4.340117567  | 3.543037073 | 0.000414155 | 0.004221986 | -0.524902093 | 2.216437622 |
| KLF12            | 1.147290088 | 3.781480971  | 2.714197409 | 0.006760045 | 0.035404207 | -3.053582784 | 2.214974497 |
| FAM19A2          | 1.147056947 | 2.536620055  | 4.274675352 | 2.10E-05    | 0.000383102 | 2.248410326  | 2.214616583 |
| KLRD1            | 1.147013962 | 0.868588245  | 2.925094061 | 0.003522717 | 0.022107201 | -2.472518787 | 2.214550601 |
| CLCN2            | 1.146882209 | 1.409684566  | 4.519071414 | 6.97E-06    | 0.00015132  | 3.286303934  | 2.214348368 |
| RP11-649A18.4    | 1.14639688  | 1.035631375  | 5.16989305  | 2.84E-07    | 9.90E-06    | 6.318563942  | 2.213603577 |
| AC090945.1       | 1.145386933 | -1.32576265  | 2.841640557 | 0.004581069 | 0.026903523 | -2.707561345 | 2.212054503 |
| STRCP1           | 1.145365607 | -1.697239723 | 2.908570206 | 0.003712646 | 0.023000041 | -2.519588229 | 2.212021804 |
| RP11-463O12.3    | 1.143757757 | -1.576408272 | 2.803638115 | 0.005152508 | 0.029286403 | -2.812376444 | 2.209557932 |
| SLC41A1          | 1.143495114 | 3.400940193  | 3.07338431  | 0.002174855 | 0.015244017 | -2.038388112 | 2.209155718 |
| FGFR1            | 1.142882233 | 4.953562035  | 2.653260646 | 0.008100522 | 0.040404595 | -3.213507545 | 2.208217431 |
| B9D1             | 1.141550773 | -0.180858403 | 3.785835933 | 0.000162481 | 0.002020755 | 0.339623283  | 2.206180412 |
| P2RY10           | 1.140275121 | 2.31701246   | 3.097658963 | 0.002005969 | 0.01429316  | -1.965316765 | 2.204230537 |
| SLC37A3          | 1.137896202 | 2.738706317  | 3.282432597 | 0.001065438 | 0.008882355 | -1.390662056 | 2.200598885 |
| RP11-75L1.1      | 1.137857517 | -0.510822878 | 3.065495036 | 0.002232493 | 0.015554346 | -2.062014956 | 2.200539879 |
| IKZF3            | 1.137672772 | 3.261892854  | 3.122283829 | 0.001847037 | 0.013436514 | -1.890615431 | 2.200258107 |
| IFI27L1          | 1.137348811 | 1.700503987  | 6.435581487 | 1.92E-10    | 1.73E-08    | 13.30797066  | 2.199764088 |
| DPCD             | 1.136952816 | 0.993820547  | 4.926031633 | 9.84E-07    | 2.88E-05    | 5.136958374  | 2.199160373 |
| ARL15            | 1.136538588 | 3.13758797   | 5.001898462 | 6.72E-07    | 2.04E-05    | 5.498758022  | 2.198529039 |
| SPRTN            | 1.134784584 | 4.46757345   | 7.41686307  | 2.59E-13    | 4.62E-11    | 19.68574378  | 2.195857728 |
| ANP32E           | 1.134743636 | 5.927966958  | 5.688375242 | 1.69E-08    | 8.67E-07    | 9.009541932  | 2.195795405 |
| CLEC17A          | 1.134577687 | 0.243378296  | 2.757337903 | 0.005935488 | 0.032354133 | -2.93820121  | 2.195542843 |
| RP11-379F4.4     | 1.133154707 | -1.872859659 | 3.211206786 | 0.001364716 | 0.010771297 | -1.616037375 | 2.19337837  |
| RP11-849H4.4     | 1.132593358 | -1.035673568 | 3.312031812 | 0.000959981 | 0.008191096 | -1.29558092  | 2.192525098 |
| RP1-80N2.2       | 1.131704132 | -2.514118772 | 2.561104556 | 0.010582421 | 0.049095985 | -3.448564594 | 2.19117412  |
| AL592494.5       | 1.130680891 | -2.125015682 | 3.08144223  | 0.002117398 | 0.014908453 | -2.01419473  | 2.189620566 |
| PRDX2            | 1.129903218 | 4.768890846  | 2.566472499 | 0.010421121 | 0.048575435 | -3.435097652 | 2.188440587 |
| CD5              | 1.129391594 | 3.427087164  | 2.559458446 | 0.010632329 | 0.049269763 | -3.452688734 | 2.187664637 |
| ZNF568           | 1.128664882 | 1.647163085  | 4.038277928 | 5.80E-05    | 0.000892332 | 1.29738939   | 2.186562947 |
| C7orf41          | 1.124285448 | 6.328178268  | 3.923623561 | 9.33E-05    | 0.001309319 | 0.854969045  | 2.179935499 |
| LLOXNC01-116E7.2 | 1.122819097 | -1.174222464 | 2.78313342  | 0.005486942 | 0.030548711 | -2.868354074 | 2.177720944 |
| RP11-322M19.2    | 1.121574464 | 0.98839794   | 4.831393138 | 1.57E-06    | 4.33E-05    | 4.693014399  | 2.175843004 |
| PELI1            | 1.120016785 | 6.404742242  | 3.119263407 | 0.001865887 | 0.013538803 | -1.899809293 | 2.173495012 |
| VIL1             | 1.118194304 | -0.777868755 | 2.841199212 | 0.004587361 | 0.026903523 | -2.708786591 | 2.170751083 |
| FAM22A           | 1.117941533 | -0.982713911 | 3.306866242 | 0.000977659 | 0.008307217 | -1.312234317 | 2.170370785 |
| FADS2            | 1.11580715  | 5.794553227  | 3.106732289 | 0.001946001 | 0.013990559 | -1.937859621 | 2.167162222 |
| RP3-330M21.5     | 1.114294219 | -0.27848303  | 3.578671814 | 0.000362222 | 0.003796228 | -0.401509289 | 2.164890746 |
| AQP3             | 1.112380394 | 2.217967367  | 3.061674121 | 0.002260909 | 0.015680551 | -2.073436447 | 2.162020787 |
| CDKL4            | 1.110025636 | -1.732405161 | 2.593174462 | 0.009650871 | 0.045749281 | -3.367695287 | 2.158494828 |

| gene          | logFC       | AveExpr      | t           | P.Value     | adj.P.Val   | B            | FoldChange  |
|---------------|-------------|--------------|-------------|-------------|-------------|--------------|-------------|
| RP11-125K10.4 | 1.108333946 | 2.204923493  | 4.654333402 | 3.70E-06    | 8.93E-05    | 3.884501528  | 2.155965282 |
| CTD-3105H18.4 | 1.10599187  | -0.9389362   | 3.125288848 | 0.001828456 | 0.013320937 | -1.881459795 | 2.15246812  |
| SEMA4F        | 1.105311068 | 0.553468654  | 3.228635158 | 0.001285046 | 0.010257039 | -1.561336955 | 2.151452619 |
| TERC          | 1.102404646 | 5.793251453  | 5.341718891 | 1.14E-07    | 4.52E-06    | 7.183546449  | 2.147122711 |
| HMBS          | 1.100069115 | 4.77790533   | 2.715759665 | 0.006728472 | 0.035303406 | -3.049435711 | 2.143649618 |
| PHLPP1        | 1.099287976 | 6.55097287   | 5.861711816 | 6.25E-09    | 3.65E-07    | 9.962839703  | 2.142489265 |
| TRAV13-1      | 1.098922499 | -2.848783699 | 2.573720672 | 0.0102068   | 0.047801643 | -3.416869513 | 2.141946579 |
| RP5-983L19.1  | 1.098828653 | -2.111339763 | 2.85733335  | 0.004362354 | 0.02599154  | -2.663873951 | 2.141807252 |
| MOB1B         | 1.09823455  | 6.803188892  | 4.657079099 | 3.65E-06    | 8.83E-05    | 3.896819181  | 2.140925436 |
| TRBV2         | 1.097671905 | -2.926478142 | 2.584186829 | 0.009904259 | 0.046638642 | -3.390459122 | 2.140090646 |
| WRN           | 1.097508157 | 5.735548018  | 6.046998475 | 2.09E-09    | 1.43E-07    | 11.0112912   | 2.139847757 |
| TMSB15B       | 1.097429441 | 1.359317137  | 2.684046536 | 0.007396095 | 0.037728464 | -3.133159027 | 2.139731006 |
| UBXN8         | 1.097413136 | 1.649977156  | 4.426730637 | 1.06E-05    | 0.000218144 | 2.887640923  | 2.139706823 |
| NRIP1         | 1.096088131 | 7.168156111  | 3.356117418 | 0.00082074  | 0.007256471 | -1.152418803 | 2.137742568 |
| DTD1          | 1.095750351 | 3.339848508  | 3.240225164 | 0.001234469 | 0.009941568 | -1.524800329 | 2.137242115 |
| RP11-67C2.2   | 1.093269012 | -1.853761178 | 2.988508249 | 0.002873188 | 0.018777765 | -2.289447667 | 2.133569361 |
| GAB1          | 1.092484704 | 4.989177374  | 4.058919034 | 5.32E-05    | 0.000831721 | 1.378346803  | 2.13240978  |
| EPB41L5       | 1.091007808 | 1.766312633  | 2.647193306 | 0.008246247 | 0.040914867 | -3.229235026 | 2.130227935 |
| NUP210L       | 1.089737594 | -0.446002489 | 3.626708802 | 0.000301817 | 0.003292205 | -0.233268351 | 2.128353212 |
| CHAC2         | 1.088541843 | -0.580173405 | 3.219558996 | 0.001325983 | 0.010524182 | -1.58985942  | 2.126589896 |
| C10orf88      | 1.087885695 | 1.812220452  | 5.565830136 | 3.37E-08    | 1.57E-06    | 8.351733787  | 2.125622928 |
| BCL7A         | 1.087096405 | 4.524517739  | 3.480035343 | 0.000523379 | 0.005083995 | -0.740113881 | 2.12446033  |
| ACTN3         | 1.086875579 | -1.74194557  | 2.674441643 | 0.007609725 | 0.038539447 | -3.158324992 | 2.124135175 |
| PRRT2         | 1.086660195 | -2.219119846 | 2.636748735 | 0.008502615 | 0.041788686 | -3.256225838 | 2.123818081 |
| RRAS2         | 1.086452516 | 1.980010715  | 2.591395587 | 0.009700558 | 0.045919843 | -3.372207    | 2.123512375 |
| CPOX          | 1.084717686 | 5.055278155  | 5.079080451 | 4.54E-07    | 1.47E-05    | 5.872215098  | 2.120960402 |
| ALDOC         | 1.084432577 | 2.138135766  | 3.750477139 | 0.00018682  | 0.002245817 | 0.210258812  | 2.120541293 |
| CDKN2B-AS1    | 1.084240336 | 0.196326877  | 2.637767851 | 0.00847729  | 0.041740749 | -3.253596871 | 2.120258748 |
| SEMA4C        | 1.082351548 | 3.72879737   | 3.103413181 | 0.001967744 | 0.014096939 | -1.947912835 | 2.117484704 |
| SLAMF7        | 1.082331933 | 1.734379254  | 2.629742044 | 0.008678576 | 0.042379808 | -3.274273547 | 2.117455915 |
| CMAS          | 1.082194002 | 4.060853644  | 5.131972974 | 3.46E-07    | 1.17E-05    | 6.131273831  | 2.117253482 |
| DNAH10        | 1.079287595 | 1.565131956  | 2.975382227 | 0.002997882 | 0.019450952 | -2.327657751 | 2.112992425 |
| TRIM25        | 1.074823374 | 7.381819731  | 6.545149376 | 9.56E-11    | 9.41E-09    | 13.97930698  | 2.106464167 |
| HERC2P2       | 1.074391175 | 5.74072721   | 3.945264048 | 8.54E-05    | 0.001214988 | 0.937529529  | 2.105833211 |
| HIST1H1T      | 1.073863589 | -1.176050037 | 2.975349231 | 0.002998201 | 0.019450952 | -2.327753596 | 2.10506326  |
| RP11-83J16.3  | 1.073117989 | -1.0348338   | 2.603312095 | 0.00937202  | 0.044836595 | -3.341925202 | 2.103975623 |
| CPEB4         | 1.07309574  | 6.88339822   | 3.749092613 | 0.00018784  | 0.002253965 | 0.205217338  | 2.103943176 |
| LEMD3         | 1.07306318  | 6.491104659  | 7.932605182 | 5.82E-15    | 1.48E-12    | 23.36098664  | 2.103895692 |
| AC093616.4    | 1.072794182 | 0.499981455  | 5.630853775 | 2.34E-08    | 1.14E-06    | 8.699102606  | 2.103503446 |
| FOXO2         | 1.071626549 | -2.156325136 | 2.783313507 | 0.005483921 | 0.030540487 | -2.867864199 | 2.101801682 |
| SIT1          | 1.070779297 | -0.167449776 | 2.62021716  | 0.008923002 | 0.043249569 | -3.298731651 | 2.10056772  |
| HIST1H2BI     | 1.068994602 | 4.672700945  | 2.618011244 | 0.008980481 | 0.04345727  | -3.304383549 | 2.097970805 |
| CD79A         | 1.068941565 | 3.233409344  | 2.934699819 | 0.003416419 | 0.021579782 | -2.445035654 | 2.09789368  |
| TBX21         | 1.06749722  | 0.635404209  | 2.958978344 | 0.003160659 | 0.020351436 | -2.375177585 | 2.095794438 |
| HMGB1P20      | 1.06648921  | -1.421404314 | 2.565269967 | 0.010457064 | 0.048697088 | -3.43811695  | 2.09433062  |
| PARO6B        | 1.065895559 | 1.498940852  | 3.587284442 | 0.000350619 | 0.003706038 | -0.371505795 | 2.093469006 |
| WEE2          | 1.065884642 | -2.363695865 | 2.616651503 | 0.009016076 | 0.043574146 | -3.307865077 | 2.093453165 |
| GARS          | 1.065551526 | 6.568982971  | 6.652663576 | 4.77E-11    | 5.08E-09    | 14.64813379  | 2.092969845 |
| GPR155        | 1.065098934 | 1.997745063  | 3.194839113 | 0.001443669 | 0.011215501 | -1.667144786 | 2.092313356 |
| NPAT          | 1.064526665 | 5.407474843  | 5.524893419 | 4.22E-08    | 1.91E-06    | 8.134983103  | 2.091483571 |
| GABARAPL1     | 1.064131969 | 6.091026158  | 3.538337507 | 0.000421501 | 0.004279245 | -0.541085536 | 2.090911456 |
| EOMES         | 1.064083537 | -0.610612231 | 2.6641945   | 0.007843732 | 0.039411864 | -3.18507572  | 2.090841264 |
| LAT           | 1.060579288 | 3.191361707  | 3.219215349 | 0.001327556 | 0.010524182 | -1.59093781  | 2.085768856 |
| IGFALS        | 1.059329257 | -0.334583347 | 3.681137517 | 0.000244836 | 0.002796136 | -0.040004076 | 2.083962414 |
| FGFBP3        | 1.057126354 | 1.064978965  | 3.64900835  | 0.000277112 | 0.003073413 | -0.154426259 | 2.080782764 |
| HIST2H2BA     | 1.056171856 | -2.243352548 | 2.744180267 | 0.006176798 | 0.033257225 | -2.973581883 | 2.079406557 |
| ZNF19         | 1.055588536 | 1.400159256  | 4.6170747   | 4.41E-06    | 0.000102993 | 3.718039639  | 2.078565968 |
| FGFR4         | 1.053414121 | 0.211735168  | 3.255996487 | 0.001168599 | 0.009526486 | -1.474876651 | 2.075435534 |
| RASGRP1       | 1.052741399 | 3.493005231  | 2.90245708  | 0.003785242 | 0.023289363 | -2.536935529 | 2.074467994 |
| MIR5010       | 1.052641956 | -0.816289455 | 3.48883559  | 0.000506653 | 0.004940873 | -0.710278726 | 2.074325009 |



| gene          | logFC        | AveExpr      | t            | P.Value     | adj.P.Val   | B            | FoldChange   |
|---------------|--------------|--------------|--------------|-------------|-------------|--------------|--------------|
| ERCC6L        | 1.006607058  | 1.279111613  | 3.149481097  | 0.001685023 | 0.012520293 | -1.807436917 | 2.009180333  |
| ARHGAP11B     | 1.005923031  | 3.967407042  | 6.150559514  | 1.12E-09    | 8.25E-08    | 11.61047046  | 2.008227943  |
| NUDT4P1       | 1.005541932  | 1.115023648  | 4.861169507  | 1.36E-06    | 3.80E-05    | 4.831809691  | 2.007697524  |
| ATP6V0A1      | 1.00437547   | 6.32991131   | 3.302942151  | 0.000991288 | 0.008382377 | -1.324868295 | 2.006074896  |
| C9orf153      | 1.004172891  | -2.175005681 | 2.782322242  | 0.005500567 | 0.030581545 | -2.870560267 | 2.00579323   |
| HAPLN3        | 1.00412141   | 2.235977376  | 2.695533832  | 0.007147683 | 0.036888683 | -3.102944225 | 2.005721657  |
| HLA-DOB       | 1.003968971  | 2.391574067  | 3.516995792  | 0.000456425 | 0.004547836 | -0.614314571 | 2.005509737  |
| BAG4          | 1.001056307  | 6.056319859  | 6.683820141  | 3.90E-11    | 4.36E-09    | 14.84381184  | 2.001464889  |
| U3            | -1.003619173 | 4.459566192  | -2.640633366 | 0.008406443 | 0.041501567 | -3.246199475 | -2.005023537 |
| RP11-121A14.3 | -1.004243627 | 0.952999009  | -3.317184756 | 0.000942643 | 0.008067509 | -1.278942911 | -2.005891577 |
| HCN3          | -1.005580953 | 1.492676545  | -4.458395852 | 9.21E-06    | 0.000192827 | 3.023459478  | -2.007751827 |
| RP1-184J9.2   | -1.008389221 | 2.193254469  | -3.209172375 | 0.001374308 | 0.010820786 | -1.622403658 | -2.011663809 |
| FAAH          | -1.008421451 | 3.893688167  | -3.012167756 | 0.002660338 | 0.017700106 | -2.220157425 | -2.011708751 |
| ZEB2-AS1      | -1.008482458 | 0.688250288  | -2.785142776 | 0.005453323 | 0.030429275 | -2.862886419 | -2.011793821 |
| RN7SKP4       | -1.009295358 | -0.658963928 | -3.985949863 | 7.22E-05    | 0.001060733 | 1.093939894  | -2.012927705 |
| AMN           | -1.009309625 | 2.58130592   | -2.564324583 | 0.010485399 | 0.048783114 | -3.44048962  | -2.012947611 |
| TMEM191A      | -1.009754622 | -0.950050019 | -4.273398404 | 2.11E-05    | 0.000384554 | 2.243133145  | -2.013568596 |
| EXT2          | -1.009772779 | 5.862938396  | -6.590416199 | 7.14E-11    | 7.32E-09    | 14.25969022  | -2.01359394  |
| FOSL2         | -1.010367102 | 8.705957256  | -3.623247675 | 0.000305832 | 0.003325964 | -0.245463324 | -2.014423617 |
| TTC39C        | -1.010643903 | 4.675911808  | -4.248304632 | 2.36E-05    | 0.000421998 | 2.139737424  | -2.014810149 |
| H2AFY         | -1.011248709 | 9.948609399  | -5.633627704 | 2.30E-08    | 1.13E-06    | 8.714005523  | -2.015654974 |
| SETD7         | -1.012696051 | 4.549346418  | -2.624515963 | 0.008811934 | 0.042897736 | -3.287703969 | -2.017678136 |
| RELL1         | -1.01341035  | 4.781289722  | -4.63592997  | 4.03E-06    | 9.59E-05    | 3.802119995  | -2.018677365 |
| HK2P1         | -1.01432603  | -0.848070665 | -3.102254852 | 0.001975384 | 0.014135255 | -1.951418806 | -2.019959028 |
| GPX1P1        | -1.015195927 | 2.225414335  | -3.251264321 | 0.001188013 | 0.009645966 | -1.489881095 | -2.021177362 |
| RP11-53I6.2   | -1.015414737 | 3.596027271  | -4.204031093 | 2.86E-05    | 0.000496628 | 1.958744777  | -2.021483934 |
| SORBS3        | -1.016420862 | 2.947149789  | -2.782412622 | 0.005499047 | 0.030581545 | -2.870314488 | -2.022894193 |
| AC067940.1    | -1.016850785 | -0.764349419 | -3.869383541 | 0.000116309 | 0.001555004 | 0.649971848  | -2.023497105 |
| ZYX           | -1.016963558 | 7.986407405  | -5.102634924 | 4.02E-07    | 1.32E-05    | 5.987266911  | -2.023655284 |
| GPR160        | -1.017380518 | 3.77575879   | -2.692494013 | 0.007212679 | 0.037146609 | -3.110952167 | -2.024240235 |
| PCYOX1        | -1.018632281 | 3.596758343  | -3.907026365 | 9.98E-05    | 0.001379549 | 0.791947248  | -2.025997341 |
| RP11-399E6.1  | -1.019334473 | -1.454456434 | -2.923844229 | 0.003536767 | 0.022174276 | -2.476088186 | -2.02698368  |
| GCNT1         | -1.019615746 | 4.430112165  | -3.246006759 | 0.001209933 | 0.009771813 | -1.50652639  | -2.027378907 |
| RP11-156P1.1  | -1.019647668 | 1.782642335  | -2.77241917  | 0.005669389 | 0.031291546 | -2.897443029 | -2.027423766 |
| TENC1         | -1.021933352 | 0.847086671  | -3.600498279 | 0.000333493 | 0.003563085 | -0.325336716 | -2.03063839  |
| CDK18         | -1.022283629 | 2.123364134  | -2.633978861 | 0.00857179  | 0.042013875 | -3.263366085 | -2.031131476 |
| CNN2          | -1.022316464 | 7.36497781   | -4.99668715  | 6.90E-07    | 2.09E-05    | 5.473737898  | -2.031177704 |
| CTB-133G6.1   | -1.02294809  | 5.263554668  | -3.604567806 | 0.000328379 | 0.003523663 | -0.311084527 | -2.032067168 |
| RP11-809O17.1 | -1.02434351  | 1.825562111  | -3.601347643 | 0.00033242  | 0.003555454 | -0.32236339  | -2.034033599 |
| GALNT6        | -1.024398106 | 4.413567661  | -4.500672006 | 7.58E-06    | 0.000163305 | 3.206238357  | -2.034110574 |
| COMT          | -1.025522005 | 5.621690383  | -4.336384273 | 1.60E-05    | 0.000304891 | 2.505240253  | -2.035695819 |
| ERO1L         | -1.026709057 | 5.978428792  | -5.396251296 | 8.53E-08    | 3.51E-06    | 7.463640507  | -2.037371482 |
| CHCHD10       | -1.027095624 | 2.042588094  | -3.830585025 | 0.00013595  | 0.001752472 | 0.505032367  | -2.037917465 |
| CD244         | -1.02871681  | 4.615843024  | -2.643487036 | 0.008336416 | 0.041269116 | -3.238824791 | -2.040208802 |
| CTA-331P3.1   | -1.029140743 | 0.987368687  | -2.554315407 | 0.01078961  | 0.049765506 | -3.465557175 | -2.0408084   |
| KLHDC9        | -1.029879346 | -2.01513481  | -2.585974978 | 0.009853378 | 0.046443255 | -3.385936317 | -2.041853482 |
| RAB27A        | -1.032035704 | 5.726693107  | -3.736956182 | 0.000197004 | 0.002344028 | 0.161102364  | -2.044907669 |
| LDHA          | -1.032622527 | 8.14969019   | -5.031831788 | 5.78E-07    | 1.79E-05    | 5.642950974  | -2.045739613 |
| ZCCHC24       | -1.032827235 | 2.880168132  | -2.709111915 | 0.006863749 | 0.035777924 | -3.067066152 | -2.046029909 |
| AC098614.2    | -1.032969827 | -1.126723843 | -3.759830141 | 0.000180068 | 0.002188512 | 0.244363244  | -2.046232143 |
| IMPA2         | -1.033388724 | 4.332785776  | -3.504848305 | 0.000477493 | 0.004703205 | -0.655802941 | -2.046826368 |
| AP1S3         | -1.034233368 | 2.744353255  | -2.736765293 | 0.006316653 | 0.033771308 | -2.993447219 | -2.04802506  |
| SFMBT2        | -1.035150859 | 6.605029144  | -3.957670827 | 8.11E-05    | 0.001167565 | 0.985060858  | -2.049327928 |
| PPEF2         | -1.035182193 | -2.16771871  | -2.829088905 | 0.004763113 | 0.027582004 | -2.742333757 | -2.049372438 |
| XX-C283C717.1 | -1.037418228 | -1.792931165 | -3.170369626 | 0.001569594 | 0.011917708 | -1.743072852 | -2.052551226 |
| GFI1          | -1.038873423 | 5.882532729  | -3.08933252  | 0.002062491 | 0.01462742  | -1.99044446  | -2.054622606 |
| MAP4          | -1.039659877 | 7.07725693   | -7.097036544 | 2.44E-12    | 3.58E-10    | 17.51739897  | -2.055742944 |
| SH3KBP1       | -1.040656323 | 6.822151512  | -5.525015279 | 4.22E-08    | 1.91E-06    | 8.135626098  | -2.057163302 |
| ARL17A        | -1.041353868 | 1.30002203   | -3.252924817 | 0.001181167 | 0.009594481 | -1.484618533 | -2.058158184 |
| C5orf62       | -1.041358998 | 6.632084278  | -3.406463464 | 0.000684778 | 0.006305205 | -0.986665218 | -2.058165502 |











| gene          | logFC        | AveExpr      | t            | P.Value     | adj.P.Val   | B            | FoldChange   |
|---------------|--------------|--------------|--------------|-------------|-------------|--------------|--------------|
| DISC1-IT1     | -1.471936374 | -1.026852854 | -3.692158307 | 0.000234603 | 0.002700461 | -0.000530875 | -2.773939599 |
| C20orf201     | -1.474238672 | -2.140294543 | -3.752764724 | 0.000185147 | 0.002231125 | 0.218592554  | -2.778369873 |
| C21orf128     | -1.474526035 | -2.298347721 | -2.817356249 | 0.004939181 | 0.028369109 | -2.774700358 | -2.778923336 |
| ZNF469        | -1.476949945 | 3.364742735  | -3.893506311 | 0.000105483 | 0.001442425 | 0.740801091  | -2.783596205 |
| IRGM          | -1.477125246 | 1.54420307   | -4.20869897  | 2.80E-05    | 0.000489554 | 1.977741127  | -2.783934457 |
| CRIP1         | -1.477475533 | 3.813993769  | -3.323321012 | 0.000922376 | 0.007918025 | -1.259096972 | -2.78461048  |
| JDP2          | -1.478255482 | 4.545195257  | -4.260969317 | 2.23E-05    | 0.000402096 | 2.191847356  | -2.786116301 |
| RP11-616M22.3 | -1.481126113 | -3.973174782 | -2.790492714 | 0.005364718 | 0.030071293 | -2.848309786 | -2.791665551 |
| AC084117.3    | -1.485102646 | 0.062450518  | -5.023198846 | 6.03E-07    | 1.86E-05    | 5.601281114  | -2.799370896 |
| ADORA3        | -1.485387897 | 0.080230535  | -4.16846621  | 3.34E-05    | 0.000563892 | 1.814677735  | -2.799924444 |
| CYSLTR1       | -1.48823732  | 3.706198026  | -4.878686812 | 1.25E-06    | 3.53E-05    | 4.913841721  | -2.805459955 |
| S100B         | -1.488681853 | 0.953024042  | -2.891695024 | 0.003916193 | 0.02393135  | -2.567388002 | -2.806324525 |
| CXorf21       | -1.488976265 | 4.389706149  | -3.788651065 | 0.000160678 | 0.0020021   | 0.349973439  | -2.806897274 |
| NTRK2         | -1.489052138 | -3.010602984 | -2.629748616 | 0.008678409 | 0.042379808 | -3.274256639 | -2.807044894 |
| AP001619.1    | -1.492871938 | -0.228662126 | -5.330028313 | 1.22E-07    | 4.75E-06    | 7.12384929   | -2.81448691  |
| NAAA          | -1.494110651 | 4.248090627  | -4.543092776 | 6.23E-06    | 0.000138023 | 3.391304811  | -2.816904494 |
| AHNAK         | -1.494986275 | 10.79265592  | -3.815508775 | 0.000144395 | 0.001837391 | 0.449094333  | -2.818614695 |
| CCDC78        | -1.496013585 | 1.492286952  | -4.393213909 | 1.24E-05    | 0.000246238 | 2.744893718  | -2.82062248  |
| PROCR         | -1.502486196 | -0.71932192  | -3.372057681 | 0.000775193 | 0.006950042 | -1.100199672 | -2.833305554 |
| PYGL          | -1.503507706 | 7.242796161  | -4.973735094 | 7.75E-07    | 2.33E-05    | 5.363837173  | -2.835312407 |
| RP5-991C6.4   | -1.504001271 | 0.352432062  | -3.839886462 | 0.000130975 | 0.00170612  | 0.539650615  | -2.836282571 |
| AP002380.1    | -1.504943614 | -3.069149681 | -2.660652969 | 0.007926096 | 0.039734904 | -3.19429755  | -2.838135784 |
| DUSP6         | -1.509238537 | 6.224389202  | -3.3904942   | 0.000725448 | 0.006602781 | -1.0395016   | -2.846597544 |
| ITGA11        | -1.509701687 | -2.104507787 | -2.84238999  | 0.004570402 | 0.02689903  | -2.705480368 | -2.847511536 |
| RP3-407E4.3   | -1.510607469 | -3.690013627 | -2.712549521 | 0.006793494 | 0.035514002 | -3.057954619 | -2.84929988  |
| RP11-5407.3   | -1.512061436 | -2.618753309 | -2.65035701  | 0.008169971 | 0.040617892 | -3.221038645 | -2.85217289  |
| RP11-514O12.4 | -1.513738144 | 4.101779489  | -6.401332234 | 2.38E-10    | 2.11E-08    | 13.10025427  | -2.855489627 |
| MEGF6         | -1.514216384 | 5.649333396  | -4.126780495 | 3.99E-05    | 0.000652947 | 1.647319586  | -2.856436353 |
| RD3           | -1.514495167 | -4.120603736 | -2.863052406 | 0.004285033 | 0.025708901 | -2.647893769 | -2.856988377 |
| LY86          | -1.514831594 | 3.047920968  | -2.644048405 | 0.008322702 | 0.041219658 | -3.237373131 | -2.857654685 |
| IL3RA         | -1.518092014 | 4.424823875  | -5.034133634 | 5.71E-07    | 1.78E-05    | 5.654073094  | -2.864120147 |
| ARRDC1        | -1.518562487 | 5.512277888  | -7.221996253 | 1.03E-12    | 1.65E-10    | 18.35439184  | -2.865054311 |
| CEACAM4       | -1.519624594 | 2.253980436  | -2.791048664 | 0.005355585 | 0.03003712  | -2.846793444 | -2.867164329 |
| NDST1         | -1.520001931 | 6.513826142  | -6.770643099 | 2.20E-11    | 2.56E-09    | 15.39349426  | -2.867914335 |
| FUT4          | -1.520417572 | 7.902818409  | -4.654859856 | 3.69E-06    | 8.92E-05    | 3.886862749  | -2.868740702 |
| TFEC          | -1.521083663 | 5.176431581  | -3.293197107 | 0.001025903 | 0.008623422 | -1.356179939 | -2.870065502 |
| TBKBP1        | -1.524268553 | 4.303412123  | -5.683714155 | 1.74E-08    | 8.88E-07    | 8.984276469  | -2.87640845  |
| ZNF467        | -1.525305831 | 3.724760083  | -4.148644726 | 3.63E-05    | 0.000603711 | 1.734896821  | -2.878477292 |
| SCGB3A1       | -1.525348963 | -2.772925637 | -3.145018626 | 0.001710674 | 0.012677313 | -1.821133147 | -2.878563351 |
| CSF3R         | -1.525421536 | 8.326849167  | -4.65907475  | 3.61E-06    | 8.77E-05    | 3.905776365  | -2.878708156 |
| VAT1          | -1.525636388 | 6.95129001   | -5.701678301 | 1.57E-08    | 8.12E-07    | 9.081757793  | -2.879136897 |
| AL163953.3    | -1.526577165 | -0.564708646 | -5.042609934 | 5.47E-07    | 1.71E-05    | 5.6950707    | -2.881014986 |
| DUSP10        | -1.526859767 | 7.379816947  | -5.744269026 | 1.23E-08    | 6.60E-07    | 9.314022441  | -2.881579388 |
| ASB13         | -1.527981194 | 2.854977282  | -4.79263955  | 1.90E-06    | 5.07E-05    | 4.513591217  | -2.88382015  |
| NLRP3         | -1.531199789 | 6.204104514  | -4.137610886 | 3.81E-05    | 0.000627213 | 1.690644918  | -2.89026102  |
| IL13RA1       | -1.532038333 | 4.521338903  | -3.365401058 | 0.00079392  | 0.007079446 | -1.122035672 | -2.891941428 |
| LINC00422     | -1.533373451 | 1.808569353  | -3.814493182 | 0.000144981 | 0.001841811 | 0.445333828  | -2.894618966 |
| ME1           | -1.534016263 | -0.655330803 | -2.714118861 | 0.006761636 | 0.035404207 | -3.05379123  | -2.89590899  |
| TPSG1         | -1.534248783 | -3.746409051 | -2.621523461 | 0.00888912  | 0.043144645 | -3.295382493 | -2.896375763 |
| LPAR6         | -1.535957649 | 3.480396037  | -2.655835912 | 0.00803937  | 0.040150182 | -3.206821332 | -2.89980854  |
| CD99          | -1.539803154 | 7.030779206  | -4.735981369 | 2.50E-06    | 6.39E-05    | 4.253753227  | -2.907548292 |
| SSPO          | -1.540908499 | 3.215001442  | -4.416846506 | 1.11E-05    | 0.000226276 | 2.845436232  | -2.909776813 |
| MYO1B         | -1.542618701 | 0.698068051  | -3.035033428 | 0.002468443 | 0.016726882 | -2.152682529 | -2.913228171 |
| AFF2          | -1.543617852 | 5.33406022   | -3.258153754 | 0.001159846 | 0.009479505 | -1.468029448 | -2.91524645  |
| SLC1A3        | -1.546433984 | 2.301972157  | -3.369435686 | 0.00078252  | 0.006999872 | -1.108805745 | -2.920942552 |
| TMEM51        | -1.55061524  | -0.319905512 | -2.648436173 | 0.008216206 | 0.040786269 | -3.226016215 | -2.929420383 |
| RP11-4C20.4   | -1.554732982 | -1.462492573 | -3.098198677 | 0.002002355 | 0.014287989 | -1.963685717 | -2.937793481 |
| CEBPD         | -1.555039158 | 4.338560322  | -3.022694938 | 0.002570356 | 0.017213497 | -2.18915469  | -2.93841702  |
| DGCR6         | -1.555398805 | 2.929934712  | -5.737940157 | 1.28E-08    | 6.80E-07    | 9.279406376  | -2.939149626 |
| PRDM8         | -1.556812765 | 4.337472686  | -3.647705933 | 0.000278501 | 0.003085502 | -0.159044002 | -2.942031646 |











| gene         | logFC        | AveExpr      | t            | P.Value     | adj.P.Val   | B            | FoldChange   |
|--------------|--------------|--------------|--------------|-------------|-------------|--------------|--------------|
| ST18         | -3.264806077 | 0.444864824  | -3.765325893 | 0.000176209 | 0.002148267 | 0.264441223  | -9.611796319 |
| ADRA2C       | -3.319698864 | -1.978996456 | -3.983074581 | 7.31E-05    | 0.001068349 | 1.082835313  | -9.984560081 |
| CCNA1        | -3.356377019 | 2.612088233  | -4.920286647 | 1.01E-06    | 2.95E-05    | 5.109775346  | -10.24165541 |
| DUSP27       | -3.414761783 | -1.338330919 | -3.94760841  | 8.46E-05    | 0.001206392 | 0.946499889  | -10.66462833 |
| HPGDS        | -3.480021953 | 0.405327855  | -3.886041602 | 0.000108727 | 0.001475567 | 0.712635831  | -11.15811912 |
| U66061.31    | -3.564234258 | 3.090823571  | -4.76605053  | 2.16E-06    | 5.65E-05    | 4.391285167  | -11.82882    |
| RP11-38J22.6 | -3.657935058 | 1.966224038  | -5.159489125 | 3.00E-07    | 1.04E-05    | 6.267048274  | -12.62258124 |
| PRODH        | -3.659091817 | -0.254704495 | -4.373603257 | 1.35E-05    | 0.000264757 | 2.661855673  | -12.63270614 |
| AC004791.2   | -3.717230591 | -0.749925099 | -3.570982167 | 0.000372883 | 0.003891479 | -0.428238082 | -13.15218499 |
| FLT3         | -3.808669731 | 6.586058684  | -6.881812193 | 1.05E-11    | 1.37E-09    | 16.1067234   | -14.0127648  |
| MAMDC2       | -3.823215122 | 1.40870478   | -4.120445149 | 4.10E-05    | 0.00066719  | 1.622026815  | -14.15475744 |
| C1orf186     | -3.901546256 | 3.08950578   | -5.845450451 | 6.87E-09    | 3.95E-07    | 9.8722731    | -14.94453658 |
| TPSAB1       | -4.342538335 | 0.638791373  | -5.062525473 | 4.94E-07    | 1.57E-05    | 5.791654305  | -20.28776922 |
| TRIM71       | -4.368037624 | 1.516805278  | -5.429310185 | 7.13E-08    | 3.01E-06    | 7.63474438   | -20.64953836 |
| TRBVB        | -4.378999487 | -0.045268815 | -5.052882597 | 5.19E-07    | 1.64E-05    | 5.744844538  | -20.80703494 |
| CD34         | -4.521231526 | 4.531661296  | -4.639101978 | 3.97E-06    | 9.47E-05    | 3.816296975  | -22.96287738 |
| TPSB2        | -4.529018848 | -0.138761009 | -5.627912449 | 2.38E-08    | 1.15E-06    | 8.683307854  | -23.08716061 |
| TPSD1        | -5.10131351  | 0.198840358  | -5.709721008 | 1.50E-08    | 7.80E-07    | 9.125494244  | -34.32799071 |





| gene          | logFC       | AveExpr      | t           | P.Value     | adj.P.Val   | B           | FoldChange  |
|---------------|-------------|--------------|-------------|-------------|-------------|-------------|-------------|
| PLCB1         | 2.261101016 | 4.528818761  | 7.525088674 | 1.14E-13    | 6.12E-12    | 20.45040892 | 4.793571715 |
| OSCAR         | 2.252963876 | 3.464383542  | 6.688322554 | 3.68E-11    | 8.40E-10    | 14.84514486 | 4.766610946 |
| CCDC73        | 2.245091967 | -0.958903794 | 8.766880697 | 7.35E-18    | 1.13E-15    | 29.84564388 | 4.740673275 |
| MANEAL        | 2.239349577 | 0.437063348  | 7.142569693 | 1.72E-12    | 6.01E-11    | 17.81382307 | 4.721841376 |
| AC026703.1    | 2.233637744 | 3.052944868  | 5.106706778 | 3.90E-07    | 2.61E-06    | 5.926705387 | 4.7031839   |
| LAMA3         | 2.230327458 | -0.042044037 | 6.889299546 | 9.68E-12    | 2.77E-10    | 16.13668276 | 4.692404743 |
| RP11-1055B8.4 | 2.230160776 | 1.089822796  | 5.484786365 | 5.19E-08    | 4.53E-07    | 7.854308354 | 4.691862637 |
| MYOF          | 2.229280276 | 3.336453312  | 5.64570145  | 2.12E-08    | 2.08E-07    | 8.714111545 | 4.688999991 |
| CP            | 2.220907399 | -1.215465067 | 6.074050885 | 1.75E-09    | 2.35E-08    | 11.1163299  | 4.661865554 |
| LDLRAD2       | 2.206326955 | 2.785640567  | 6.537117642 | 9.80E-11    | 1.97E-09    | 13.89657506 | 4.614988188 |
| IGKV2-24      | 2.202488903 | 0.043859174  | 6.100836166 | 1.49E-09    | 2.05E-08    | 11.27198591 | 4.602727091 |
| RP11-867G2.8  | 2.189338315 | 0.188791664  | 7.145802853 | 1.68E-12    | 5.89E-11    | 17.83558788 | 4.560962519 |
| VWA1          | 2.178179996 | -0.840730402 | 6.669789319 | 4.15E-11    | 9.35E-10    | 14.72780789 | 4.525822473 |
| AF064858.8    | 2.174407187 | -0.194403123 | 7.341916355 | 4.24E-13    | 1.86E-11    | 19.17240594 | 4.514002405 |
| RP11-615J4.1  | 2.173022922 | 0.397516012  | 7.135018199 | 1.81E-12    | 6.27E-11    | 17.76302309 | 4.5096733   |
| SERPINI2      | 2.172891006 | 1.020491157  | 6.403204339 | 2.30E-10    | 4.15E-09    | 13.07316087 | 4.509260967 |
| RP11-112J1.2  | 2.172643153 | -3.238833599 | 6.213070971 | 7.50E-10    | 1.14E-08    | 11.93113013 | 4.508486349 |
| RP11-359N11.2 | 2.16634743  | -3.308292747 | 5.149641716 | 3.12E-07    | 2.15E-06    | 6.139036116 | 4.488854799 |
| NEGR1         | 2.157869195 | 1.356186108  | 4.511985347 | 7.15E-06    | 3.28E-05    | 3.160343028 | 4.462552663 |
| CTB-26E19.1   | 2.152874651 | 0.238284412  | 5.610328077 | 2.59E-08    | 2.47E-07    | 8.523097861 | 4.447130224 |
| ITGAE         | 2.150280915 | 4.781857772  | 12.81810543 | 4.93E-35    | 1.39E-31    | 68.56803385 | 4.439142172 |
| RXFP1         | 2.141324653 | -0.594616161 | 4.235853677 | 2.48E-05    | 9.78E-05    | 1.987669202 | 4.411669309 |
| TRBV6-6       | 2.140797565 | -2.118407629 | 7.593043332 | 6.93E-14    | 3.95E-12    | 20.93170788 | 4.410057801 |
| CCDC170       | 2.13637378  | -1.241559741 | 7.256213204 | 7.76E-13    | 3.12E-11    | 18.58418657 | 4.396555801 |
| IQCJ-SCHIP1   | 2.133213698 | 0.425988749  | 5.35381798  | 1.06E-07    | 8.36E-07    | 7.171834541 | 4.386936119 |
| RP3-406A7.7   | 2.132319266 | -2.910208642 | 7.266690128 | 7.21E-13    | 2.95E-11    | 18.65576021 | 4.384217177 |
| RP11-356M20.1 | 2.124327545 | -3.567406296 | 6.65985956  | 4.43E-11    | 9.86E-10    | 14.66506638 | 4.359998217 |
| ACY3          | 2.122901858 | 1.265950671  | 5.812634599 | 8.17E-09    | 9.08E-08    | 9.630741926 | 4.355691749 |
| FAM124A       | 2.116133837 | -2.016314909 | 6.613555784 | 5.98E-11    | 1.28E-09    | 14.37361273 | 4.33530603  |
| DOCK1         | 2.112409517 | 1.425878435  | 3.827780772 | 0.000137004 | 0.000436967 | 0.38585481  | 4.324128862 |
| CEACAM8       | 2.108804449 | 3.595475733  | 4.7442293   | 2.38E-06    | 1.26E-05    | 4.201685639 | 4.313337034 |
| VNN1          | 2.108316812 | 3.150291131  | 5.932002875 | 4.07E-09    | 4.93E-08    | 10.3015238  | 4.311879354 |
| TRGV9         | 2.105379306 | 0.324312329  | 7.670272546 | 3.93E-14    | 2.44E-12    | 21.48338762 | 4.303108765 |
| NR6A1         | 2.091689537 | 2.898028569  | 7.46986758  | 1.69E-13    | 8.53E-12    | 20.06215219 | 4.262469576 |
| SCD5          | 2.091378252 | 0.985909379  | 7.600800217 | 6.54E-14    | 3.76E-12    | 20.98689319 | 4.261549979 |
| HOPX          | 2.090987553 | 1.265955405  | 5.70173184  | 1.54E-08    | 1.58E-07    | 9.018979991 | 4.260396055 |
| ZNF366        | 2.087528655 | -2.742206723 | 6.280812772 | 4.94E-10    | 8.00E-09    | 12.3343648  | 4.250193884 |
| UMODL1        | 2.08501577  | 1.232906236  | 5.461772865 | 5.89E-08    | 5.07E-07    | 7.733257754 | 4.242797342 |
| SLC5A10       | 2.080787615 | 0.26185912   | 4.44339195  | 9.80E-06    | 4.33E-05    | 2.862386166 | 4.230381038 |
| C10orf114     | 2.079630209 | -0.114839873 | 3.920335669 | 9.42E-05    | 0.000315005 | 0.735375957 | 4.226988564 |
| FAM198B       | 2.076897323 | 2.276855217  | 5.303425914 | 1.39E-07    | 1.06E-06    | 6.913397536 | 4.218988992 |
| HTR7          | 2.074396395 | 0.643553815  | 5.080781166 | 4.45E-07    | 2.94E-06    | 5.799310997 | 4.211681662 |
| CD96          | 2.074381291 | 5.128189441  | 6.426838765 | 1.98E-10    | 3.65E-09    | 13.2173434  | 4.21163757  |
| TTC24         | 2.072103126 | 1.95265587   | 7.82043484  | 1.28E-14    | 9.31E-13    | 22.57028621 | 4.204992203 |
| ARHGAP22-IT1  | 2.070647368 | -3.308435677 | 7.336290788 | 4.41E-13    | 1.93E-11    | 19.1336043  | 4.20075128  |
| GGT5          | 2.066216142 | 1.73619718   | 5.326705495 | 1.23E-07    | 9.50E-07    | 7.032500031 | 4.187868501 |
| RP11-497G19.2 | 2.066065518 | 0.342371123  | 4.234624833 | 2.49E-05    | 9.82E-05    | 1.982610171 | 4.187431291 |
| CNNM1         | 2.060944331 | -2.166597842 | 5.001937798 | 6.66E-07    | 4.17E-06    | 5.415678832 | 4.172593364 |
| LINC00211     | 2.049957296 | -0.045010342 | 7.363202565 | 3.64E-13    | 1.64E-11    | 19.31946722 | 4.14093712  |
| CLEC12A       | 2.045595915 | 5.379845273  | 7.158129485 | 1.54E-12    | 5.51E-11    | 17.91864942 | 4.128437646 |
| C17orf51      | 2.041828494 | -0.072622987 | 7.037420828 | 3.54E-12    | 1.14E-10    | 17.11085641 | 4.117670801 |
| COL23A1       | 2.037210479 | 3.072671019  | 5.966395451 | 3.32E-09    | 4.14E-08    | 10.49715418 | 4.104511356 |
| MDFI          | 2.035353441 | -0.660442634 | 4.585268836 | 5.08E-06    | 2.45E-05    | 3.48351873  | 4.099231427 |
| XIRP2         | 2.035240491 | -2.888040627 | 5.184400973 | 2.60E-07    | 1.84E-06    | 6.312171371 | 4.098910505 |
| VEGFC         | 2.0272788   | -3.254199083 | 6.221046132 | 7.14E-10    | 1.10E-08    | 11.9783919  | 4.076352463 |
| PROM1         | 2.024679222 | 4.599086526  | 4.373840315 | 1.34E-05    | 5.70E-05    | 2.564753303 | 4.069013938 |
| BPI           | 2.020779025 | 5.500069331  | 4.974747983 | 7.64E-07    | 4.69E-06    | 5.28470508  | 4.058028578 |
| RP11-290L7.3  | 2.017640449 | -3.874326781 | 6.487927567 | 1.34E-10    | 2.59E-09    | 13.59228711 | 4.049209953 |
| MUC19         | 2.015167617 | 0.455482904  | 5.339321179 | 1.14E-07    | 8.93E-07    | 7.097250382 | 4.042275402 |
| AC073043.2    | 2.014943526 | 0.804955075  | 7.187964741 | 1.25E-12    | 4.62E-11    | 18.12022692 | 4.041647575 |
| METTL7B       | 2.010626165 | -0.047054758 | 4.520493196 | 6.88E-06    | 3.17E-05    | 3.197605436 | 4.029570753 |

| gene          | logFC       | AveExpr      | t           | P.Value     | adj.P.Val   | B            | FoldChange  |
|---------------|-------------|--------------|-------------|-------------|-------------|--------------|-------------|
| RFX8          | 2.004861317 | 2.80204066   | 4.511583159 | 7.17E-06    | 3.29E-05    | 3.158583207  | 4.013501166 |
| CRHBP         | 2.00078371  | 1.085415338  | 6.434407551 | 1.89E-10    | 3.49E-09    | 13.26362065  | 4.002173497 |
| GUCY1A3       | 1.995940093 | 4.114844632  | 5.409306847 | 7.85E-08    | 6.46E-07    | 7.459083883  | 3.988759372 |
| PDE7B         | 1.992304269 | 0.446486337  | 7.973281296 | 4.04E-15    | 3.35E-13    | 23.69580289  | 3.978719711 |
| ZNF385D       | 1.988572876 | -2.361983101 | 4.714788894 | 2.75E-06    | 1.43E-05    | 4.066907637  | 3.968442428 |
| SLC51A        | 1.979300014 | -0.509619753 | 6.406987773 | 2.24E-10    | 4.07E-09    | 13.09620886  | 3.943017229 |
| HOXA6         | 1.977361274 | 1.388696234  | 2.757258715 | 0.005930662 | 0.01208806  | -3.062810292 | 3.937722035 |
| KIAA1456      | 1.977233369 | 0.405673296  | 4.275757786 | 2.08E-05    | 8.38E-05    | 2.152720728  | 3.937372943 |
| DEFA1         | 1.970302738 | 2.49238478   | 4.114786124 | 4.18E-05    | 0.000154421 | 1.49606257   | 3.91850337  |
| ADAMTS6       | 1.965035386 | 2.435459601  | 8.454993534 | 9.32E-17    | 1.18E-14    | 27.36813787  | 3.904222804 |
| RP11-848G14.5 | 1.962872143 | 0.999230464  | 6.2985099   | 4.42E-10    | 7.35E-09    | 12.4403747   | 3.898373021 |
| ASCL2         | 1.961832401 | 0.157614563  | 6.371661222 | 2.80E-10    | 4.94E-09    | 12.88149546  | 3.895564497 |
| RP11-848G14.2 | 1.961761677 | -1.736537869 | 7.532379934 | 1.08E-13    | 5.84E-12    | 20.50186488  | 3.895373532 |
| MYCN          | 1.958518647 | 2.78055411   | 4.133001489 | 3.87E-05    | 0.000144096 | 1.569146874  | 3.886626969 |
| RP11-497H16.2 | 1.952567315 | -0.848422561 | 5.362774116 | 1.01E-07    | 8.04E-07    | 7.21800828   | 3.870627077 |
| RP11-402J7.2  | 1.952109735 | 0.123923182  | 6.252890643 | 5.87E-10    | 9.24E-09    | 12.16766669  | 3.869399624 |
| INPP4B        | 1.950389255 | 3.294444373  | 6.627711428 | 5.46E-11    | 1.18E-09    | 14.46251487  | 3.864787938 |
| CMAHP         | 1.948944638 | 5.539268347  | 10.43700028 | 2.53E-24    | 1.35E-21    | 44.39305884  | 3.860919939 |
| DEFA3         | 1.947798811 | 3.165767923  | 3.572644124 | 0.000369552 | 0.001045129 | -0.535547794 | 3.857854708 |
| RP4-666F24.3  | 1.947116619 | -2.374226323 | 8.485582069 | 7.29E-17    | 9.52E-15    | 27.60767888  | 3.856030918 |
| ZNF804A       | 1.945282637 | 2.077901367  | 5.111956333 | 3.79E-07    | 2.56E-06    | 5.952575922  | 3.851132169 |
| RP11-597D13.9 | 1.944012688 | -1.222223031 | 5.135053838 | 3.36E-07    | 2.30E-06    | 6.066703679  | 3.847743657 |
| ADRB1         | 1.941977233 | -0.158546353 | 4.560949482 | 5.70E-06    | 2.70E-05    | 3.37571744   | 3.84231882  |
| Z95704.4      | 1.93592434  | -1.654140806 | 5.672683487 | 1.82E-08    | 1.83E-07    | 8.860571189  | 3.826231966 |
| RP11-12A2.1   | 1.929025472 | 0.725926634  | 6.370792762 | 2.82E-10    | 4.96E-09    | 12.87623081  | 3.807978867 |
| CLNK          | 1.929006086 | -1.5709432   | 5.49938169  | 4.79E-08    | 4.23E-07    | 7.931328277  | 3.807927698 |
| PDE3A         | 1.926035271 | -0.135110804 | 4.601039629 | 4.72E-06    | 2.29E-05    | 3.55372065   | 3.800094435 |
| SPNS2         | 1.91939698  | 3.974491424  | 6.053873262 | 1.97E-09    | 2.61E-08    | 10.99949368  | 3.782649178 |
| AC007092.1    | 1.91843109  | -2.060958657 | 5.364525634 | 1.00E-07    | 7.97E-07    | 7.227046839  | 3.780117527 |
| SPON1         | 1.917811818 | -0.874433068 | 5.472050961 | 5.57E-08    | 4.83E-07    | 7.787261016  | 3.778495274 |
| RP11-497H16.6 | 1.916634809 | -0.951096632 | 5.649817948 | 2.07E-08    | 2.04E-07    | 8.73641365   | 3.775413882 |
| RP1-249H1.4   | 1.912623943 | -1.553267189 | 4.955574009 | 8.41E-07    | 5.10E-06    | 5.19275284   | 3.764932352 |
| FUT7          | 1.912589907 | 2.946825585  | 7.680300351 | 3.65E-14    | 2.31E-12    | 21.55538567  | 3.764843532 |
| IL2RA         | 1.908441388 | 0.491942361  | 6.346144028 | 3.29E-10    | 5.67E-09    | 12.7270854   | 3.754033145 |
| TMEM221       | 1.906810904 | -3.720363361 | 6.380089401 | 2.66E-10    | 4.71E-09    | 12.93262199  | 3.749792863 |
| CHST12        | 1.896462291 | 3.685470803  | 8.374615804 | 1.77E-16    | 2.05E-14    | 26.74228482  | 3.72299142  |
| CLEC12B       | 1.888213074 | 1.594306823  | 6.709110971 | 3.21E-11    | 7.49E-10    | 14.97711485  | 3.701764392 |
| AMN           | 1.885586428 | 2.662728925  | 8.20013841  | 7.01E-16    | 7.05E-14    | 25.40171782  | 3.695030897 |
| ANO7          | 1.885226714 | 1.168505993  | 5.262623352 | 1.72E-07    | 1.29E-06    | 6.705836169  | 3.694109712 |
| NAIP          | 1.882340404 | 2.827732089  | 7.633198279 | 5.16E-14    | 3.03E-12    | 21.21792898  | 3.686726526 |
| DEFA4         | 1.878387977 | 3.245667858  | 3.920849991 | 9.40E-05    | 0.000314397 | 0.737340874  | 3.676640143 |
| RP11-341G23.4 | 1.873712019 | -1.479621358 | 6.735191617 | 2.70E-11    | 6.52E-10    | 15.14321175  | 3.664742974 |
| PF4           | 1.872667508 | -0.412411067 | 4.217316375 | 2.69E-05    | 0.000104796 | 1.911503552  | 3.662090662 |
| MMP8          | 1.867114857 | 4.379050418  | 4.203885076 | 2.85E-05    | 0.000110256 | 1.856518955  | 3.648023079 |
| HSH2D         | 1.863311694 | 6.839902826  | 9.703238964 | 2.27E-21    | 8.60E-19    | 37.74175838  | 3.638419001 |
| HS3ST5        | 1.86236817  | -4.024820949 | 6.013696011 | 2.51E-09    | 3.22E-08    | 10.76793038  | 3.636040251 |
| RP6-109B7.2   | 1.861523671 | -1.9543263   | 4.589571372 | 4.98E-06    | 2.41E-05    | 3.502648038  | 3.633912472 |
| DNMT3B        | 1.86122926  | 3.862467946  | 7.696677393 | 3.23E-14    | 2.08E-12    | 21.67315053  | 3.633170977 |
| FAM83H        | 1.858437849 | 1.891161266  | 5.940782978 | 3.86E-09    | 4.73E-08    | 10.35136604  | 3.626148099 |
| EMBP1         | 1.854012388 | 0.001131597  | 11.57420721 | 3.13E-29    | 3.25E-26    | 55.46412211  | 3.615041948 |
| ALCAM         | 1.84938482  | 5.172103307  | 9.147294257 | 2.99E-19    | 6.85E-17    | 32.97169394  | 3.603464969 |
| NR5A2         | 1.840373676 | -2.724867523 | 5.35741728  | 1.04E-07    | 8.23E-07    | 7.190382112  | 3.581027695 |
| AC004840.9    | 1.836169309 | 2.506105409  | 7.348086108 | 4.05E-13    | 1.79E-11    | 19.21499183  | 3.570606895 |
| NR1I2         | 1.835474716 | 0.83797317   | 6.664533843 | 4.29E-11    | 9.62E-10    | 14.69458895  | 3.56888822  |
| CTD-2562J15.1 | 1.833171074 | 6.496488302  | 9.671434361 | 3.02E-21    | 1.10E-18    | 37.46251927  | 3.563194098 |
| MAEL          | 1.832975575 | -2.999355912 | 5.817567727 | 7.94E-09    | 8.87E-08    | 9.658210553  | 3.562711286 |
| AGR2          | 1.823360176 | -3.514890261 | 4.767809604 | 2.13E-06    | 1.14E-05    | 4.310215281  | 3.539045172 |
| PGAM1P10      | 1.822153903 | -0.90396064  | 6.082359193 | 1.66E-09    | 2.26E-08    | 11.16454338  | 3.536087326 |
| AC132807.1    | 1.813451659 | -2.974754483 | 5.700075133 | 1.56E-08    | 1.59E-07    | 9.009925076  | 3.514822074 |
| TTLL6         | 1.803711529 | -0.976378503 | 4.784970844 | 1.96E-06    | 1.06E-05    | 4.389524501  | 3.491172225 |
| IGLL1         | 1.795329363 | 2.531293024  | 3.781436341 | 0.000164786 | 0.000514027 | 0.213890674  | 3.470947066 |





| gene           | logFC       | AveExpr      | t           | P.Value     | adj.P.Val   | B            | FoldChange  |
|----------------|-------------|--------------|-------------|-------------|-------------|--------------|-------------|
| COL17A1        | 1.481936811 | -0.018007891 | 3.473083607 | 0.000535645 | 0.001446821 | -0.878293604 | 2.793234721 |
| RP11-436I9.5   | 1.480274109 | -0.148689853 | 6.679662003 | 3.89E-11    | 8.82E-10    | 14.79027633  | 2.790017379 |
| PPP1R8P1       | 1.478712483 | -2.224132478 | 4.687163041 | 3.14E-06    | 1.60E-05    | 3.941167475  | 2.786998997 |
| RHPN1          | 1.476388274 | 4.138070229  | 5.965543887 | 3.34E-09    | 4.15E-08    | 10.49229761  | 2.782512703 |
| ACP6           | 1.474327963 | 2.123132571  | 6.177036686 | 9.35E-10    | 1.38E-08    | 11.71828801  | 2.778541836 |
| KIT            | 1.474067566 | 6.035765745  | 4.667244447 | 3.45E-06    | 1.74E-05    | 3.850946531  | 2.778040373 |
| SV2B           | 1.469928712 | -1.148500459 | 3.791210321 | 0.000158518 | 0.000496811 | 0.249988202  | 2.770082055 |
| INHBA          | 1.46923691  | 1.730739188  | 4.17127439  | 3.28E-05    | 0.000124803 | 1.723723844  | 2.768754062 |
| GCNT1P3        | 1.467355147 | -0.357776666 | 6.124784431 | 1.28E-09    | 1.81E-08    | 11.41169469  | 2.765145024 |
| DPYD           | 1.466632045 | 5.881965455  | 7.208676242 | 1.08E-12    | 4.09E-11    | 18.26060697  | 2.763759435 |
| PDGFD          | 1.466423623 | 0.142867912  | 3.967825404 | 7.75E-05    | 0.000265028 | 0.917860684  | 2.763360192 |
| HOXA3          | 1.465973544 | 1.850716174  | 2.293739527 | 0.022003733 | 0.038619597 | -4.213356598 | 2.762498238 |
| TIFAB          | 1.465160493 | 1.617610604  | 2.968449375 | 0.003061509 | 0.006733339 | -2.469585193 | 2.760941832 |
| NHSL2          | 1.46291197  | 2.28184801   | 4.204507217 | 2.84E-05    | 0.00011     | 1.859062112  | 2.756642097 |
| NPM2           | 1.458198087 | 0.459057214  | 6.075175214 | 1.73E-09    | 2.34E-08    | 11.12285084  | 2.747649702 |
| NEXN           | 1.457484494 | -0.083293129 | 6.758899164 | 2.31E-11    | 5.66E-10    | 15.29470721  | 2.746290982 |
| PLA2G4A        | 1.457418507 | 3.630511061  | 7.197561241 | 1.17E-12    | 4.35E-11    | 18.18522544  | 2.746165374 |
| AC093627.10    | 1.457088533 | 2.281092501  | 6.702292767 | 3.35E-11    | 7.77E-10    | 14.93378985  | 2.745537342 |
| CMTM4          | 1.456764659 | 4.085485971  | 6.119539518 | 1.33E-09    | 1.86E-08    | 11.38105352  | 2.744921058 |
| LRRC63         | 1.456096371 | -0.595158208 | 6.472999659 | 1.48E-10    | 2.80E-09    | 13.50036243  | 2.743649845 |
| SOHLH2         | 1.454909245 | 0.095529076  | 5.588046434 | 2.93E-08    | 2.76E-07    | 8.40335832   | 2.741393153 |
| RP11-382B18.2  | 1.452036768 | 0.252862838  | 5.227752412 | 2.07E-07    | 1.50E-06    | 6.529652815  | 2.735940334 |
| RP11-508M1.7   | 1.451242902 | -3.714928557 | 4.533568721 | 6.47E-06    | 3.01E-05    | 3.255004714  | 2.734435253 |
| RAB44          | 1.451038218 | 3.320309561  | 5.796477538 | 8.97E-09    | 9.87E-08    | 9.540929021  | 2.73404733  |
| CYP4F3         | 1.450996711 | 2.972378311  | 3.709051657 | 0.000219012 | 0.000659649 | -0.05062006  | 2.733968671 |
| RNASE3         | 1.449405084 | 4.438432299  | 3.720669122 | 0.000209304 | 0.000633436 | -0.008502302 | 2.730954133 |
| RP11-262H14.1  | 1.449170101 | 3.485459245  | 5.315112664 | 1.30E-07    | 1.01E-06    | 6.973127315  | 2.730509358 |
| GPR97          | 1.448627626 | 4.979959921  | 4.598712068 | 4.77E-06    | 2.31E-05    | 3.543345221  | 2.729482838 |
| CCDC169-SOHLH2 | 1.446849929 | -0.049913142 | 5.649171896 | 2.08E-08    | 2.05E-07    | 8.7329125    | 2.726121624 |
| LINC00571      | 1.446692445 | -2.268956529 | 6.350775386 | 3.19E-10    | 5.52E-09    | 12.7550682   | 2.725824058 |
| SLC46A1        | 1.446372292 | 1.432846583  | 4.632899013 | 4.06E-06    | 2.01E-05    | 3.696244667  | 2.725219231 |
| FAM27E1        | 1.445802151 | -2.425663088 | 4.740098295 | 2.43E-06    | 1.28E-05    | 4.182725475  | 2.724142459 |
| RP11-764K9.2   | 1.44216237  | -2.198114753 | 6.510991394 | 1.16E-10    | 2.27E-09    | 13.73469555  | 2.717278372 |
| BLNK           | 1.441225508 | 1.240781203  | 5.278782348 | 1.58E-07    | 1.19E-06    | 6.787854876  | 2.71551439  |
| NBPF3          | 1.439886319 | 2.041199878  | 5.119822015 | 3.64E-07    | 2.46E-06    | 5.991386373  | 2.712994869 |
| CD38           | 1.430981812 | 5.397897182  | 7.340646759 | 4.27E-13    | 1.88E-11    | 19.16364672  | 2.696301471 |
| GARNL3         | 1.430756528 | 0.10876729   | 5.816234722 | 8.00E-09    | 8.93E-08    | 9.650785966  | 2.695880464 |
| RP11-597D13.7  | 1.430406524 | -1.4619813   | 6.60734065  | 6.23E-11    | 1.32E-09    | 14.33463478  | 2.69522651  |
| MGST1          | 1.427467519 | 3.749589432  | 3.622717961 | 0.000305578 | 0.000883716 | -0.359592859 | 2.689741483 |
| ST3GAL4        | 1.425597639 | 5.154513546  | 7.580323719 | 7.60E-14    | 4.25E-12    | 20.84132492  | 2.686257562 |
| AC018633.4     | 1.422069122 | 2.073816204  | 7.295976134 | 5.86E-13    | 2.45E-11    | 18.85632318  | 2.679695591 |
| APOL4          | 1.419942182 | -0.169469144 | 4.044806785 | 5.62E-05    | 0.000199815 | 1.2181957    | 2.675747873 |
| RGS3           | 1.419774017 | 4.567262087  | 7.372452433 | 3.41E-13    | 1.55E-11    | 19.38349174  | 2.675435998 |
| DYX1C1         | 1.419760003 | -1.053891339 | 6.318555886 | 3.91E-10    | 6.59E-09    | 12.56078829  | 2.67541001  |
| ATP1B1         | 1.416392189 | 3.332149519  | 6.484441475 | 1.37E-10    | 2.63E-09    | 13.57080262  | 2.66917184  |
| GCNT1          | 1.416105072 | 4.486660072  | 7.723461086 | 2.65E-14    | 1.74E-12    | 21.86622963  | 2.668640691 |
| FRMD3          | 1.416103324 | 2.359381667  | 5.823490534 | 7.67E-09    | 8.61E-08    | 9.691218731  | 2.668637458 |
| RP11-451B8.1   | 1.414753015 | -4.149981233 | 4.738068598 | 2.46E-06    | 1.30E-05    | 4.173415526  | 2.66614088  |
| CD33           | 1.413056434 | 4.517671493  | 6.725275288 | 2.88E-11    | 6.89E-10    | 15.07998919  | 2.663007394 |
| KANK1          | 1.412885222 | 3.35696199   | 6.208917384 | 7.69E-10    | 1.17E-08    | 11.90653775  | 2.66269138  |
| CTD-2335A18.1  | 1.411848533 | -0.348631421 | 4.294441335 | 1.91E-05    | 7.80E-05    | 2.230513069  | 2.660778716 |
| CLIP4          | 1.411408696 | 3.673975587  | 5.960947219 | 3.43E-09    | 4.26E-08    | 10.46609341  | 2.659967642 |
| RP11-429J17.6  | 1.409731261 | -2.376586518 | 4.806315817 | 1.76E-06    | 9.72E-06    | 4.488548769  | 2.656876671 |
| GTSF1          | 1.404454267 | 2.773730966  | 3.291681077 | 0.001029323 | 0.002578994 | -1.478440143 | 2.647176275 |
| SULT1B1        | 1.401757435 | 0.714406648  | 4.629880525 | 4.12E-06    | 2.03E-05    | 3.6827009    | 2.642232528 |
| TMEM217        | 1.39815483  | 1.695496783  | 7.644235424 | 4.76E-14    | 2.83E-12    | 21.29683701  | 2.635642746 |
| GJA3           | 1.396232281 | -3.754928496 | 3.959411246 | 8.02E-05    | 0.000273448 | 0.88537294   | 2.632132802 |
| CD180          | 1.395115397 | 3.163717231  | 4.35511408  | 1.46E-05    | 6.14E-05    | 2.485390908  | 2.630095886 |
| AC099489.1     | 1.394125323 | 2.212229029  | 6.144157009 | 1.14E-09    | 1.64E-08    | 11.52508219  | 2.628291557 |
| RP11-1055B8.3  | 1.392088028 | -1.978152187 | 4.054164665 | 5.41E-05    | 0.000193042 | 1.255085693  | 2.624582646 |
| HOXA11-AS      | 1.390028549 | -1.754995018 | 2.679173682 | 0.00749666  | 0.014868356 | -3.27123024  | 2.620838669 |



























| gene          | logFC        | AveExpr      | t            | P.Value     | adj.P.Val   | B            | FoldChange   |
|---------------|--------------|--------------|--------------|-------------|-------------|--------------|--------------|
| HOXC4         | -1.098382468 | -3.654574953 | -3.703490769 | 0.000223807 | 0.000671761 | -0.070735023 | -2.141144953 |
| CTD-2302E22.4 | -1.099171515 | -0.182910683 | -6.154937906 | 1.07E-09    | 1.55E-08    | 11.58832679  | -2.142316321 |
| GPR15         | -1.099832582 | -2.389834232 | -4.009640296 | 6.51E-05    | 0.000227892 | 1.080303237  | -2.143298191 |
| CYP2E1        | -1.100241703 | 0.393560795  | -4.278274727 | 2.06E-05    | 8.30E-05    | 2.163181391  | -2.143906076 |
| AC006296.3    | -1.100339104 | -1.722479503 | -4.984745405 | 7.26E-07    | 4.48E-06    | 5.332783739  | -2.144050823 |
| KRT8P31       | -1.100794333 | -3.227958746 | -3.416777854 | 0.000658134 | 0.001732829 | -1.067942136 | -2.144727466 |
| SLC26A11      | -1.101219703 | 2.567121319  | -4.35121606  | 1.49E-05    | 6.23E-05    | 2.468912236  | -2.145359918 |
| RP11-723O4.6  | -1.101436237 | -1.95919754  | -3.584622919 | 0.000353196 | 0.001004347 | -0.493672731 | -2.145681939 |
| IGLC2         | -1.101692529 | 0.510931885  | -3.142166701 | 0.00172434  | 0.004065295 | -1.949386911 | -2.146063149 |
| AF131215.2    | -1.102171099 | -0.949088636 | -3.945186    | 8.51E-05    | 0.0002884   | 0.830600288  | -2.146775158 |
| GPC1          | -1.102732102 | 0.19729843   | -3.183992056 | 0.001495638 | 0.003590914 | -1.819805289 | -2.14761011  |
| FAM198A       | -1.102816531 | -2.450029735 | -3.837553752 | 0.000131739 | 0.000422964 | 0.42237807   | -2.147735796 |
| MORN3         | -1.103128779 | -0.935496128 | -5.572991245 | 3.19E-08    | 2.97E-07    | 8.322706967  | -2.148200689 |
| ARNT2         | -1.103777118 | -3.076405119 | -3.35029697  | 0.000836192 | 0.002143287 | -1.287960383 | -2.149166296 |
| KREMEN1       | -1.10394187  | 1.777836268  | -3.629484434 | 0.000297777 | 0.000863434 | -0.335632963 | -2.149411739 |
| IGHV4-34      | -1.104018622 | -0.122960799 | -4.518992206 | 6.92E-06    | 3.19E-05    | 3.191026547  | -2.149526092 |
| AL132709.8    | -1.104062742 | -4.260943099 | -3.227870837 | 0.001286047 | 0.003133857 | -1.682056288 | -2.149591828 |
| AC003102.3    | -1.104096794 | -1.17838141  | -3.533182008 | 0.000428585 | 0.001192085 | -0.672530692 | -2.149642566 |
| RP11-388M20.1 | -1.104762383 | 2.303589222  | -5.941138271 | 3.85E-09    | 4.72E-08    | 10.35338439  | -2.150634535 |
| ARHGEF10      | -1.105115428 | 1.899338727  | -4.206858606 | 2.81E-05    | 0.000109052 | 1.868677286  | -2.151160885 |
| AP000783.2    | -1.10528011  | -1.437929981 | -3.776816677 | 0.000167829 | 0.000522011 | 0.196860749  | -2.151406452 |
| AQP8          | -1.105621422 | -1.525169484 | -5.770487035 | 1.04E-08    | 1.12E-07    | 9.396946021  | -2.151915491 |
| AC005336.1    | -1.106284566 | -0.621542644 | -2.234965795 | 0.025630854 | 0.044152844 | -4.34432396  | -2.152904859 |
| LPHN1         | -1.106645137 | 2.914945112  | -4.71213154  | 2.78E-06    | 1.44E-05    | 4.054781818  | -2.153442999 |
| HECTD2        | -1.106781292 | 0.661946231  | -4.111663253 | 4.24E-05    | 0.000156198 | 1.483564248  | -2.153646242 |
| DBNDD2        | -1.10687018  | 1.9069768    | -6.811184627 | 1.63E-11    | 4.29E-10    | 15.63054135  | -2.153778938 |
| CYP1A1        | -1.107051578 | -3.753782419 | -3.638632537 | 0.000287526 | 0.000837861 | -0.303170493 | -2.15404976  |
| TMEM136       | -1.107239255 | -1.072503061 | -2.447934577 | 0.014531838 | 0.026760178 | -3.853773988 | -2.154329994 |
| AC068282.3    | -1.107306358 | 0.083451447  | -4.798134939 | 1.83E-06    | 1.01E-05    | 4.450545972  | -2.154430199 |
| AMOTL2        | -1.107480922 | -2.415170228 | -3.097646822 | 0.002002835 | 0.004636535 | -2.085469503 | -2.154690898 |
| GLYCTK-AS1    | -1.108556514 | -3.592995254 | -3.537267562 | 0.000422087 | 0.001176999 | -0.658417614 | -2.156297914 |
| RP5-862P8.2   | -1.109277924 | 1.424723167  | -3.930911224 | 9.02E-05    | 0.000303149 | 0.775829201  | -2.157376425 |
| MFSD2B        | -1.109314026 | 2.708024934  | -4.221473396 | 2.64E-05    | 0.000103199 | 1.928555763  | -2.157430413 |
| RSPO1         | -1.110339373 | -3.683624074 | -3.339809973 | 0.000868063 | 0.00221605  | -1.322280886 | -2.158964278 |
| IL31RA        | -1.11056648  | -0.150536666 | -2.360677461 | 0.018424948 | 0.032998959 | -4.06009896  | -2.159304165 |
| TRBV19        | -1.110839992 | -2.287205361 | -4.263232625 | 2.20E-05    | 8.79E-05    | 2.100753239  | -2.159713574 |
| SLAMF7        | -1.111312109 | 1.689942022  | -4.583122063 | 5.14E-06    | 2.46E-05    | 3.473980502  | -2.160420449 |
| RP5-934G17.6  | -1.111464169 | -3.936015945 | -3.539134846 | 0.000419148 | 0.001170292 | -0.651961992 | -2.16064817  |
| FMNL3         | -1.111659895 | 5.452718805  | -6.86790305  | 1.12E-11    | 3.14E-10    | 15.99752157  | -2.160941317 |
| RP11-44F14.1  | -1.112602968 | -2.008788596 | -3.145729337 | 0.001703672 | 0.004020893 | -1.938414778 | -2.162354362 |
| LRRN3         | -1.113284139 | -1.219605443 | -3.370712675 | 0.000777242 | 0.002007569 | -1.220844538 | -2.163375562 |
| IL12RB2       | -1.113419177 | 0.249131145  | -2.697062295 | 0.007108277 | 0.014192092 | -3.224004233 | -2.163578066 |
| LARP6         | -1.113517221 | -3.847667865 | -3.460418379 | 0.000561182 | 0.001507541 | -0.921216529 | -2.163725106 |
| LIPN          | -1.114373828 | -1.301151626 | -3.274206217 | 0.001094446 | 0.002717996 | -1.534589959 | -2.165010209 |
| SOX13         | -1.114622458 | -0.231629794 | -3.702462833 | 0.000224704 | 0.000674218 | -0.074450078 | -2.165383353 |
| PRKCG         | -1.11485942  | 0.413230951  | -4.614201244 | 4.44E-06    | 2.17E-05    | 3.612485183  | -2.165739046 |
| MIPOL1        | -1.115445946 | -3.790084187 | -3.488540565 | 0.000505949 | 0.00137812  | -0.825701869 | -2.166619703 |
| IGHV3-21      | -1.115531694 | -0.430476444 | -4.013792962 | 6.40E-05    | 0.000224257 | 1.09652563   | -2.166748482 |
| ERVFRD-1      | -1.115738005 | -1.354643563 | -2.750550959 | 0.006052551 | 0.012314866 | -3.080945918 | -2.167058358 |
| RBP7          | -1.115776872 | -2.205126708 | -3.443714692 | 0.0005966   | 0.001589912 | -0.977591649 | -2.16711674  |
| SPEG          | -1.115829596 | -0.417526203 | -4.484948837 | 8.10E-06    | 3.66E-05    | 3.042377372  | -2.167195941 |
| MRAS          | -1.115930416 | 0.768311645  | -2.944203699 | 0.003309715 | 0.007212488 | -2.539877745 | -2.167347396 |
| CDH2          | -1.117282025 | -3.557388604 | -2.882942532 | 0.00402074  | 0.008583672 | -2.714958513 | -2.169378856 |
| S100A2        | -1.117830249 | -2.291120385 | -4.821136208 | 1.64E-06    | 9.15E-06    | 4.557551853  | -2.170203378 |
| C1QTNF5       | -1.117902303 | -3.943072987 | -3.535987074 | 0.000424114 | 0.001181314 | -0.662842627 | -2.170311769 |
| RP11-677M14.7 | -1.117948075 | -1.330224448 | -5.671448654 | 1.83E-08    | 1.84E-07    | 8.853854138  | -2.170380626 |
| TCF23         | -1.118008791 | -4.594680092 | -3.281572988 | 0.001066541 | 0.002660417 | -1.510954907 | -2.17047197  |
| MFRP          | -1.118482306 | -3.942519195 | -3.537636454 | 0.000421505 | 0.00117604  | -0.657142533 | -2.17118447  |
| UBE2E3        | -1.118612032 | 4.477494661  | -5.156628127 | 3.01E-07    | 2.08E-06    | 6.173746502  | -2.171379709 |
| TRIM72        | -1.118859714 | 0.023676601  | -3.918112171 | 9.51E-05    | 0.000317299 | 0.726884164  | -2.171752523 |
| ATP6V0E2-AS1  | -1.119883593 | -1.374569815 | -4.781265145 | 1.99E-06    | 1.08E-05    | 4.372375853  | -2.173294362 |

| gene             | logFC        | AveExpr      | t            | P.Value     | adj.P.Val   | B            | FoldChange   |
|------------------|--------------|--------------|--------------|-------------|-------------|--------------|--------------|
| RASD1            | -1.121130067 | 1.485202385  | -3.732279048 | 0.000200008 | 0.000609134 | 0.03371621   | -2.175172876 |
| WWC1             | -1.121438763 | -2.176051895 | -3.179486569 | 0.001518855 | 0.003638243 | -1.833844761 | -2.175638352 |
| ELFN2            | -1.122002314 | -1.659150838 | -3.699369214 | 0.000227424 | 0.000681168 | -0.08562464  | -2.176488375 |
| EEF1A2           | -1.122114326 | -1.521478631 | -2.809788367 | 0.00505016  | 0.010484051 | -2.91928223  | -2.176657365 |
| GPBAR1           | -1.122322821 | 1.182278727  | -5.420947805 | 7.37E-08    | 6.13E-07    | 7.519700795  | -2.176971953 |
| GJC2             | -1.122375786 | 0.485392519  | -4.822376839 | 1.63E-06    | 9.11E-06    | 4.563337384  | -2.177051877 |
| MSANTD1          | -1.122978838 | 1.037749783  | -4.89885116  | 1.12E-06    | 6.57E-06    | 4.922711287  | -2.177962083 |
| PCDHGB2          | -1.123419623 | 2.295227539  | -3.695514858 | 0.000230857 | 0.000690715 | -0.099534357 | -2.178627615 |
| MYO1A            | -1.123432068 | -0.470572218 | -5.422218339 | 7.31E-08    | 6.09E-07    | 7.526324181  | -2.178646409 |
| CCDC173          | -1.1234366   | -1.161844667 | -5.24640574  | 1.88E-07    | 1.38E-06    | 6.623759537  | -2.178653252 |
| RP11-548K23.11   | -1.123545797 | 3.247477111  | -4.773106713 | 2.07E-06    | 1.12E-05    | 4.334666338  | -2.178818159 |
| RP1-18D14.7      | -1.123657692 | -3.659682944 | -3.576774323 | 0.000363834 | 0.001031177 | -0.521125032 | -2.178987155 |
| AC104820.2       | -1.124169347 | -1.44569096  | -4.739491733 | 2.44E-06    | 1.29E-05    | 4.179942859  | -2.179760075 |
| C17orf28         | -1.125034502 | -1.117981458 | -4.749388127 | 2.33E-06    | 1.23E-05    | 4.225385413  | -2.181067624 |
| GPRC5B           | -1.125111714 | -2.271719639 | -3.92757509  | 9.15E-05    | 0.00030659  | 0.763056517  | -2.181184358 |
| MTERFD3          | -1.125605123 | 2.09646475   | -5.884812294 | 5.37E-09    | 6.26E-08    | 10.03481573  | -2.181930461 |
| FBP1             | -1.125935972 | 2.3215253    | -3.171334387 | 0.001561711 | 0.003731383 | -1.859198086 | -2.182430894 |
| RAMP1            | -1.127623609 | -0.885689321 | -2.920562059 | 0.00356928  | 0.007721405 | -2.607873197 | -2.184985354 |
| ISPD             | -1.1280968   | 2.157074246  | -6.006746718 | 2.61E-09    | 3.34E-08    | 10.7280236   | -2.185702127 |
| RP5-877J2.1      | -1.128439213 | 1.873181832  | -3.879614515 | 0.000111185 | 0.000363901 | 0.580598833  | -2.186220948 |
| CTD-2031P19.3    | -1.129005885 | -0.445776199 | -5.740006755 | 1.24E-08    | 1.31E-07    | 9.228863255  | -2.187079836 |
| PRODH2           | -1.129025682 | -4.222227831 | -3.757314911 | 0.000181268 | 0.000558526 | 0.125192642  | -2.187109848 |
| IGF1R            | -1.129347638 | 5.821081681  | -4.773210069 | 2.07E-06    | 1.12E-05    | 4.335143677  | -2.187597984 |
| UTS2             | -1.129948989 | -2.742905293 | -3.014554299 | 0.002635856 | 0.005901805 | -2.334355657 | -2.18851002  |
| RP11-796E2.4     | -1.131088417 | 1.098298979  | -5.549552665 | 3.63E-08    | 3.33E-07    | 8.197553145  | -2.190239168 |
| RP13-638C3.4     | -1.131464769 | 0.314826088  | -6.001772902 | 2.69E-09    | 3.43E-08    | 10.69948755  | -2.190810605 |
| PECR             | -1.132998483 | 0.973771889  | -4.989756896 | 7.08E-07    | 4.38E-06    | 5.356919138  | -2.193140871 |
| MPP2             | -1.133028759 | -0.340943438 | -3.656187163 | 0.000268777 | 0.000790502 | -0.240654054 | -2.193186896 |
| COL25A1          | -1.133153327 | -2.690387929 | -3.860243026 | 0.000120244 | 0.000389927 | 0.507520605  | -2.193376273 |
| MAMLD1           | -1.133632196 | -0.283129863 | -3.968774736 | 7.72E-05    | 0.000264173 | 0.92153033   | -2.194104434 |
| IGHV3-43         | -1.133688228 | -2.357601048 | -3.938436193 | 8.75E-05    | 0.000295697 | 0.804677851  | -2.19418965  |
| LCK              | -1.133719116 | 2.799055168  | -4.843975479 | 1.47E-06    | 8.30E-06    | 4.66428802   | -2.194236629 |
| CD46P1           | -1.133753305 | -2.430978143 | -3.767995214 | 0.000173787 | 0.000537661 | 0.164397565  | -2.194288629 |
| PTPRK            | -1.133978164 | -0.040537596 | -4.090640943 | 4.63E-05    | 0.000168509 | 1.399667974  | -2.194630658 |
| AL713998.1       | -1.134084724 | -4.038649562 | -3.470488829 | 0.000540787 | 0.001458912 | -0.887099878 | -2.194792763 |
| TRAV3            | -1.134154401 | -2.894413512 | -4.425949312 | 1.06E-05    | 4.64E-05    | 2.787319027  | -2.194898766 |
| CTD-2258A20.4    | -1.134305631 | -1.952124659 | -4.656147173 | 3.64E-06    | 1.82E-05    | 3.800841365  | -2.195128858 |
| SLC30A10         | -1.134579294 | -3.420863898 | -3.475629359 | 0.000530645 | 0.001434887 | -0.869647467 | -2.195545288 |
| RP11-1299A16.3   | -1.134609123 | -1.670507512 | -3.65437593  | 0.000270657 | 0.000794964 | -0.247117874 | -2.195590684 |
| CECR6            | -1.135209088 | 0.90606101   | -3.156354177 | 0.00164338  | 0.003896795 | -1.90562019  | -2.196503942 |
| AC013400.2       | -1.135245165 | 1.916913448  | -5.050036696 | 5.21E-07    | 3.38E-06    | 5.649036892  | -2.196558869 |
| RSPH4A           | -1.135378287 | -0.330056598 | -5.108709662 | 3.86E-07    | 2.59E-06    | 5.936572896  | -2.196761562 |
| RAB15            | -1.135893454 | 1.531783344  | -4.977092175 | 7.55E-07    | 4.64E-06    | 5.295970291  | -2.197546135 |
| CXCL5            | -1.13613626  | -3.466651501 | -3.526985035 | 0.00043862  | 0.001216737 | -0.69390704  | -2.197916015 |
| SPTBN4           | -1.136176613 | -1.472023818 | -3.97254587  | 7.60E-05    | 0.00026081  | 0.936116072  | -2.197977493 |
| DNAAF1           | -1.136224764 | -1.35991183  | -3.656617623 | 0.000268332 | 0.000789428 | -0.239117393 | -2.198050853 |
| P2RY10           | -1.136576506 | 2.273156324  | -5.225590924 | 2.10E-07    | 1.52E-06    | 6.518768577  | -2.198586823 |
| C8orf31          | -1.136937277 | -2.42709529  | -3.209922153 | 0.001368264 | 0.003312108 | -1.738626093 | -2.199136686 |
| XXbac-B476C20.14 | -1.137019142 | -1.257602808 | -5.462094006 | 5.88E-08    | 5.07E-07    | 7.734943646  | -2.199261479 |
| RP11-890B15.2    | -1.137265943 | 0.08406254   | -5.761206562 | 1.10E-08    | 1.18E-07    | 9.345680708  | -2.199637737 |
| ANK3             | -1.137488737 | 1.710621243  | -4.545699859 | 6.12E-06    | 2.87E-05    | 3.308400745  | -2.199977451 |
| RASIP1           | -1.137540889 | -1.630942127 | -4.02985446  | 5.99E-05    | 0.000211493 | 1.159423077  | -2.200056979 |
| DPP10            | -1.137907426 | -2.613161735 | -2.29493701  | 0.021934737 | 0.038508777 | -4.210653227 | -2.200616006 |
| SGPP2            | -1.138112872 | -1.52930266  | -3.626165236 | 0.00030158  | 0.000873434 | -0.347391596 | -2.200929405 |
| ADARB2-AS1       | -1.139152997 | -4.33811903  | -3.44882831  | 0.000585542 | 0.001564184 | -0.960361445 | -2.20251676  |
| C9orf118         | -1.139345555 | -2.067181038 | -4.620954929 | 4.30E-06    | 2.11E-05    | 3.642701845  | -2.202810752 |
| TRIP6            | -1.13939742  | 2.93435633   | -5.371709066 | 9.62E-08    | 7.69E-07    | 7.264145515  | -2.202889944 |
| UBASH3A          | -1.139552212 | 1.197937786  | -4.747302909 | 2.35E-06    | 1.25E-05    | 4.2158029    | -2.203126313 |
| FBXO32           | -1.139568026 | 3.152327721  | -5.545009105 | 3.72E-08    | 3.41E-07    | 8.173349608  | -2.203150462 |
| AOC4             | -1.139635122 | -1.909948794 | -3.969483819 | 7.70E-05    | 0.000263583 | 0.924271849  | -2.203252927 |
| CTD-2245O6.1     | -1.139965338 | -0.485282588 | -6.650616565 | 4.70E-11    | 1.03E-09    | 14.6067363   | -2.203757284 |

| gene           | logFC        | AveExpr      | t            | P.Value     | adj.P.Val   | B            | FoldChange   |
|----------------|--------------|--------------|--------------|-------------|-------------|--------------|--------------|
| LMNA           | -1.140092261 | 6.905556727  | -4.705392175 | 2.87E-06    | 1.48E-05    | 4.024058666  | -2.203951171 |
| SLC7A11        | -1.140280975 | 2.671767211  | -3.372422887 | 0.000772484 | 0.001996857 | -1.215204178 | -2.204239481 |
| PGF            | -1.140369286 | -0.704609253 | -3.523244864 | 0.000444782 | 0.001230889 | -0.70679097  | -2.204374412 |
| MOCS2          | -1.141610369 | 2.361918333  | -7.007508947 | 4.35E-12    | 1.38E-10    | 16.91261142  | -2.206271548 |
| HBQ1           | -1.141763355 | -0.869009887 | -3.102856265 | 0.001968234 | 0.004566081 | -2.069644401 | -2.206505518 |
| RP11-277P12.20 | -1.142727579 | -1.894986916 | -4.226357138 | 2.58E-05    | 0.000101344 | 1.948609729  | -2.207980727 |
| RP11-348F1.3   | -1.142818886 | -2.61221219  | -4.470414548 | 8.66E-06    | 3.88E-05    | 2.979243169  | -2.208120472 |
| C1orf88        | -1.142982023 | -2.005937632 | -5.199607584 | 2.40E-07    | 1.71E-06    | 6.388262834  | -2.208370176 |
| GPC5           | -1.143164255 | -3.130676846 | -3.32718865  | 0.000907916 | 0.002306148 | -1.363446712 | -2.208649141 |
| RP11-713P17.3  | -1.143332664 | -2.566600156 | -3.873545635 | 0.000113951 | 0.000371721 | 0.557665987  | -2.208906977 |
| GTF2IRD1       | -1.143360852 | 1.033950223  | -4.171908624 | 3.27E-05    | 0.000124485 | 1.726297001  | -2.208950135 |
| CD27           | -1.143385649 | 0.469178393  | -4.79729603  | 1.84E-06    | 1.01E-05    | 4.446652469  | -2.208988103 |
| RP11-57H12.2   | -1.143591016 | -2.807496346 | -3.502546184 | 0.000480375 | 0.001317557 | -0.777851301 | -2.209302575 |
| TCAM1P         | -1.143951574 | -3.025726638 | -3.428188269 | 0.00063138  | 0.001669941 | -1.029754427 | -2.209854791 |
| CSPG4P5        | -1.144161942 | -3.257388776 | -3.720937064 | 0.000209085 | 0.000633064 | -0.0075294   | -2.210177048 |
| SNAP25         | -1.144221522 | -4.429712895 | -3.484090434 | 0.000514337 | 0.001396533 | -0.840866657 | -2.210268324 |
| GZMA           | -1.145604801 | -0.662723749 | -3.609856908 | 0.000320937 | 0.000923126 | -0.405013341 | -2.212388581 |
| IL7R           | -1.145781231 | 4.470783765  | -4.458700899 | 9.14E-06    | 4.07E-05    | 2.928504755  | -2.212659156 |
| U73166.2       | -1.145905263 | 3.38097086   | -7.202345405 | 1.13E-12    | 4.24E-11    | 18.21765858  | -2.212849391 |
| SNORA31        | -1.146171251 | 0.894902596  | -6.600545433 | 6.51E-11    | 1.37E-09    | 14.29205738  | -2.213257409 |
| SPAG16         | -1.146591526 | 0.044863592  | -4.516015114 | 7.02E-06    | 3.23E-05    | 3.177984065  | -2.213902252 |
| ZNF204P        | -1.147084648 | -1.578910968 | -4.226676249 | 2.58E-05    | 0.000101223 | 1.949920863  | -2.214659108 |
| SHE            | -1.147526013 | -1.733025219 | -3.052880246 | 0.002324036 | 0.005281558 | -2.220384045 | -2.215336743 |
| CTD-2506J14.1  | -1.149285898 | -2.655435082 | -4.598982566 | 4.77E-06    | 2.31E-05    | 3.544550743  | -2.218040792 |
| IGKC           | -1.150124477 | 5.649768407  | -4.547608722 | 6.06E-06    | 2.84E-05    | 3.316815215  | -2.219330421 |
| MID2           | -1.150375896 | -1.770234474 | -4.023541997 | 6.15E-05    | 0.000216342 | 1.134674193  | -2.219717219 |
| C10orf111      | -1.150464286 | -0.380977065 | -6.094878422 | 1.54E-09    | 2.11E-08    | 11.23730886  | -2.219853219 |
| COL7A1         | -1.150477114 | 2.104111901  | -4.990293608 | 7.06E-07    | 4.37E-06    | 5.359505322  | -2.219872957 |
| ST5            | -1.150769026 | -0.184327844 | -4.3721388   | 1.35E-05    | 5.74E-05    | 2.557528672  | -2.220322167 |
| INS-IGF2       | -1.15130714  | -2.732684281 | -3.530077356 | 0.000433585 | 0.001203956 | -0.683244712 | -2.221150485 |
| RP11-739P1.2   | -1.15158727  | -3.438888418 | -3.779293542 | 0.000166191 | 0.00051765  | 0.205988943  | -2.22158181  |
| TMEM30B        | -1.153006541 | -2.486307248 | -4.483324695 | 8.16E-06    | 3.68E-05    | 3.035312624  | -2.223768398 |
| INSL3          | -1.153336577 | 0.164667834  | -5.462638082 | 5.87E-08    | 5.05E-07    | 7.737800091  | -2.224277173 |
| FBLN1          | -1.153423883 | -2.648647688 | -3.129697141 | 0.001798512 | 0.004219488 | -1.987694341 | -2.224411781 |
| TLE2           | -1.153448527 | -0.756233638 | -4.758548808 | 2.22E-06    | 1.18E-05    | 4.267530553  | -2.224449778 |
| RP11-382A20.4  | -1.153529626 | -3.032391279 | -3.931775951 | 8.99E-05    | 0.000302231 | 0.779141603  | -2.224574826 |
| TNS1           | -1.153957383 | 6.137664966  | -4.515777154 | 7.03E-06    | 3.23E-05    | 3.176941932  | -2.225234507 |
| FFAR3          | -1.155280448 | -2.903032958 | -3.93626939  | 8.82E-05    | 0.000297934 | 0.796365439  | -2.227276159 |
| ASS1           | -1.155476616 | -2.262765154 | -2.994182763 | 0.002816767 | 0.006256452 | -2.394359611 | -2.227579029 |
| RPS16P5        | -1.156010253 | 2.967153695  | -7.086527646 | 2.53E-12    | 8.47E-11    | 17.43798054  | -2.228403138 |
| SUSD4          | -1.156432297 | -2.39461283  | -4.221673702 | 2.64E-05    | 0.00010317  | 1.929377832  | -2.229055128 |
| TCF7L2         | -1.157409635 | 4.603987246  | -6.402606427 | 2.31E-10    | 4.16E-09    | 13.06951965  | -2.230565688 |
| MIR4732        | -1.157857925 | -2.822158672 | -3.487400967 | 0.000508084 | 0.00138222  | -0.829587097 | -2.231258902 |
| CCNJL          | -1.15790773  | -0.410655514 | -3.337719978 | 0.000874548 | 0.00223145  | -1.329108169 | -2.231335932 |
| CXorf57        | -1.158623049 | -1.606768716 | -4.674273818 | 3.34E-06    | 1.69E-05    | 3.882743907  | -2.23244255  |
| ST7-OT4        | -1.158904923 | 2.902001302  | -4.586132992 | 5.06E-06    | 2.44E-05    | 3.487359432  | -2.232878767 |
| LGR6           | -1.159141292 | -0.805439412 | -4.39872231  | 1.20E-05    | 5.18E-05    | 2.670711532  | -2.233244629 |
| SLC25A47       | -1.160140276 | -3.087541402 | -4.54179883  | 6.23E-06    | 2.91E-05    | 3.291215145  | -2.234791559 |
| IGLC1          | -1.160506908 | 2.249429614  | -3.942225385 | 8.61E-05    | 0.000291631 | 0.819224831  | -2.235359558 |
| PTH1R          | -1.160645918 | -2.990606755 | -3.266417204 | 0.001124685 | 0.00278433  | -1.55952312  | -2.235574956 |
| FZD6           | -1.160964354 | 1.017533049  | -3.475824106 | 0.000530264 | 0.001434054 | -0.868985794 | -2.236068452 |
| MAP7D2         | -1.16147366  | -0.786373852 | -4.357845908 | 1.44E-05    | 6.07E-05    | 2.49694804   | -2.236857978 |
| MAP3K9         | -1.161751707 | 1.842576584  | -5.185028435 | 2.59E-07    | 1.83E-06    | 6.315306906  | -2.237289123 |
| SPTLC3         | -1.162083089 | -0.265529573 | -2.977010747 | 0.002978008 | 0.006566531 | -2.444628855 | -2.23780308  |
| MAFF           | -1.163473365 | 5.886996642  | -4.912537243 | 1.04E-06    | 6.18E-06    | 4.987595408  | -2.239960614 |
| RP11-206L10.11 | -1.164148453 | 3.362092947  | -8.130299859 | 1.21E-15    | 1.13E-13    | 24.8720616   | -2.241009016 |
| RP11-585P4.5   | -1.164282328 | 0.780536846  | -5.220239984 | 2.16E-07    | 1.56E-06    | 6.49184212   | -2.24121698  |
| PFKFB2         | -1.164474036 | 4.524383552  | -5.514656298 | 4.41E-08    | 3.93E-07    | 8.012139454  | -2.241514817 |
| RP11-74C1.2    | -1.165199389 | -1.349668967 | -4.450910854 | 9.47E-06    | 4.20E-05    | 2.894832593  | -2.242642081 |
| RP4-811H24.6   | -1.16536962  | 4.994285     | -7.444155814 | 2.04E-13    | 9.96E-12    | 19.88224932  | -2.242906718 |
| RP11-638I2.6   | -1.165804457 | -2.391563427 | -4.661222545 | 3.55E-06    | 1.79E-05    | 3.823742923  | -2.243582844 |

| gene          | logFC        | AveExpr      | t            | P.Value     | adj.P.Val   | B            | FoldChange   |
|---------------|--------------|--------------|--------------|-------------|-------------|--------------|--------------|
| TP53INP2      | -1.166849754 | 5.85670751   | -5.765732601 | 1.07E-08    | 1.15E-07    | 9.370672876  | -2.24520901  |
| ARHGEF37      | -1.167912598 | 0.879600873  | -3.95477582  | 8.18E-05    | 0.000278291 | 0.867503768  | -2.246863681 |
| RP3-403A15.5  | -1.168322085 | -2.558521575 | -4.225774206 | 2.59E-05    | 0.000101521 | 1.946214876  | -2.24750151  |
| PTPRB         | -1.170147881 | -1.80187449  | -3.084591293 | 0.002092018 | 0.004818113 | -2.125014547 | -2.250347626 |
| GOLGA7B       | -1.170260936 | -1.188144984 | -4.710984561 | 2.80E-06    | 1.45E-05    | 4.049550043  | -2.250523978 |
| RP4-773A18.4  | -1.170301643 | -1.787638578 | -5.533327273 | 3.97E-08    | 3.60E-07    | 8.111206238  | -2.25058748  |
| PLCL1         | -1.170863695 | 1.798084643  | -4.40705884  | 1.16E-05    | 5.02E-05    | 2.706341534  | -2.251464444 |
| IGKJ1         | -1.171878604 | 0.060080438  | -5.003511197 | 6.60E-07    | 4.14E-06    | 5.423278736  | -2.253048865 |
| IER5          | -1.172069633 | 6.713458707  | -7.252470154 | 7.97E-13    | 3.19E-11    | 18.55863832  | -2.253347215 |
| SOGA3         | -1.172406748 | -2.541249862 | -4.248340275 | 2.35E-05    | 9.31E-05    | 2.039155697  | -2.253873816 |
| DPY19L2P1     | -1.172831432 | -3.324672736 | -3.210715179 | 0.001364531 | 0.003304694 | -1.7361332   | -2.254537383 |
| CCL2          | -1.172833513 | -3.070083116 | -3.349007722 | 0.000840051 | 0.002150941 | -1.292185344 | -2.254540635 |
| SLC25A34      | -1.17287573  | 1.49036516   | -7.333485807 | 4.50E-13    | 1.97E-11    | 19.1142673   | -2.254606609 |
| PLAT          | -1.173147242 | -3.062601413 | -3.90702142  | 9.95E-05    | 0.000329864 | 0.684597169  | -2.255030962 |
| U4atac        | -1.173701043 | -0.811394908 | -6.597740434 | 6.63E-11    | 1.39E-09    | 14.27449359  | -2.255896756 |
| CTB-161K23.1  | -1.173992859 | -1.24136217  | -6.122516941 | 1.30E-09    | 1.83E-08    | 11.39844485  | -2.256353106 |
| GPR150        | -1.17439003  | -2.205321531 | -4.640460371 | 3.92E-06    | 1.95E-05    | 3.730209168  | -2.256974361 |
| RP3-370M22.8  | -1.174774143 | -0.408270501 | -5.009641305 | 6.40E-07    | 4.03E-06    | 5.45291038   | -2.257575353 |
| CYP4F2        | -1.175066225 | -0.117230952 | -2.795453511 | 0.005277877 | 0.01090286  | -2.958714402 | -2.25803246  |
| SLC7A10       | -1.17587891  | -3.534386538 | -3.651946737 | 0.000273198 | 0.000801469 | -0.255782134 | -2.25930479  |
| RP11-420A6.2  | -1.176189072 | -0.875973675 | -5.092178739 | 4.20E-07    | 2.79E-06    | 5.855240944  | -2.259790566 |
| RPL31P52      | -1.176764967 | -0.387166808 | -6.36169734  | 2.98E-10    | 5.21E-09    | 12.8211337   | -2.260692809 |
| RNASE4        | -1.178173248 | -1.068470977 | -4.663839563 | 3.51E-06    | 1.77E-05    | 3.835561021  | -2.262900653 |
| RELB          | -1.178226941 | 6.059601816  | -6.19946629  | 8.15E-10    | 1.23E-08    | 11.85063696  | -2.262984873 |
| EBF1          | -1.178560528 | 1.4195329    | -4.444542605 | 9.75E-06    | 4.31E-05    | 2.867348179  | -2.263508193 |
| TNFRSF12A     | -1.178761505 | 2.862190484  | -4.915362431 | 1.03E-06    | 6.11E-06    | 5.001010802  | -2.263823535 |
| PAIP2B        | -1.179167481 | 1.078142687  | -4.684241467 | 3.18E-06    | 1.62E-05    | 3.927911213  | -2.264460668 |
| MOCS1         | -1.179437634 | -2.298734158 | -3.068065288 | 0.002210136 | 0.005053724 | -2.174836478 | -2.264884742 |
| ANKRD34B      | -1.179537629 | -3.721629865 | -3.614618738 | 0.000315167 | 0.000908121 | -0.388214679 | -2.265041729 |
| IGHV4-39      | -1.180386253 | -0.500246299 | -4.226699264 | 2.58E-05    | 0.000101223 | 1.95001543   | -2.266374466 |
| IGKJ5         | -1.180387682 | 5.819905772  | -4.855740986 | 1.38E-06    | 7.87E-06    | 4.719460576  | -2.266376711 |
| RP11-732A19.9 | -1.180769416 | -1.944656845 | -5.373972377 | 9.50E-08    | 7.62E-07    | 7.275844059  | -2.266976469 |
| NMUR1         | -1.180987072 | 1.090764844  | -2.995897057 | 0.002801117 | 0.0062273   | -2.389325599 | -2.267318507 |
| FAM211A       | -1.181124236 | 1.265280464  | -4.509450119 | 7.24E-06    | 3.32E-05    | 3.149252364  | -2.267534084 |
| AL049758.2    | -1.181273053 | 1.141960136  | -8.569471464 | 3.70E-17    | 5.03E-15    | 28.26847677  | -2.267767996 |
| NAGS          | -1.182297958 | -2.681990717 | -4.419862983 | 1.09E-05    | 4.76E-05    | 2.761192441  | -2.269379613 |
| SH2D1B        | -1.182863871 | -1.468704427 | -3.887686675 | 0.000107604 | 0.000353471 | 0.611155627  | -2.270269978 |
| MYO3B         | -1.183044017 | -3.182751482 | -3.575839446 | 0.000365121 | 0.001034527 | -0.524391069 | -2.270553478 |
| CXADR         | -1.183872817 | -1.644248849 | -3.00363872  | 0.002731426 | 0.006089524 | -2.366556997 | -2.271858242 |
| KRT13         | -1.184309211 | -3.8466375   | -3.819244636 | 0.000141764 | 0.000449805 | 0.354027901  | -2.27254555  |
| HABP4         | -1.184803962 | 0.872437587  | -5.49711384  | 4.85E-08    | 4.28E-07    | 7.919348106  | -2.273325019 |
| SLC16A2       | -1.185116892 | -3.709595229 | -3.906493942 | 9.97E-05    | 0.000330463 | 0.682588888  | -2.273818172 |
| CTD-2284O10.1 | -1.185213208 | -2.796516024 | -3.992471519 | 7.00E-05    | 0.00024241  | 1.013406167  | -2.27396998  |
| ADAMTS10      | -1.185356483 | 3.324648135  | -4.219643383 | 2.66E-05    | 0.000103882 | 1.921047002  | -2.27419582  |
| CABP1         | -1.185524361 | -2.846862846 | -4.048875048 | 5.53E-05    | 0.000196639 | 1.234223181  | -2.27446047  |
| CABP4         | -1.1858674   | 0.861319809  | -5.548743188 | 3.65E-08    | 3.34E-07    | 8.193239692  | -2.275001347 |
| TRPV3         | -1.186410181 | -0.48138234  | -4.02787715  | 6.04E-05    | 0.000212985 | 1.151666717  | -2.275857427 |
| RNF157        | -1.186725769 | 1.127271238  | -5.086662347 | 4.32E-07    | 2.87E-06    | 5.82815613   | -2.276355321 |
| LIN7A         | -1.187351648 | 1.86188329   | -2.757742732 | 0.005921953 | 0.012074052 | -3.061499981 | -2.277343079 |
| CPEB2         | -1.18743251  | 5.083236145  | -4.584382449 | 5.10E-06    | 2.45E-05    | 3.479579943  | -2.277470725 |
| DCST1         | -1.18863817  | -0.994306244 | -4.498002479 | 7.63E-06    | 3.48E-05    | 3.099247894  | -2.279374803 |
| AKAP5         | -1.190039726 | -1.457722474 | -5.551405621 | 3.59E-08    | 3.30E-07    | 8.207429199  | -2.281590257 |
| ZNF80         | -1.190829817 | -2.419089022 | -5.008395002 | 6.44E-07    | 4.05E-06    | 5.446883214  | -2.28284011  |
| GMPR          | -1.191141704 | 3.665836442  | -4.438122659 | 1.00E-05    | 4.42E-05    | 2.839678984  | -2.283333676 |
| RP11-304F15.4 | -1.191394458 | -2.571320614 | -4.133895521 | 3.85E-05    | 0.000143627 | 1.572741977  | -2.283733741 |
| RP11-521I2.3  | -1.191570151 | 1.081723952  | -5.711001255 | 1.46E-08    | 1.51E-07    | 9.069688571  | -2.284011874 |
| RP11-10H3.1   | -1.191685924 | -4.557116451 | -3.289836423 | 0.001036024 | 0.002592491 | -1.48438116  | -2.284195168 |
| ANK1          | -1.192027758 | 5.690197035  | -3.142323792 | 0.001723424 | 0.004063621 | -1.948903362 | -2.284736453 |
| DKK2          | -1.19257723  | -2.939394693 | -3.138306057 | 0.001746997 | 0.004111832 | -1.961263071 | -2.285606794 |
| LOX           | -1.193769926 | -1.909083525 | -2.939385676 | 0.003361172 | 0.007312505 | -2.553778544 | -2.287497118 |
| IGLL5         | -1.193849274 | 2.41583315   | -4.116083885 | 4.16E-05    | 0.000153654 | 1.501259156  | -2.287622935 |

| gene              | logFC        | AveExpr      | t            | P.Value     | adj.P.Val   | B            | FoldChange   |
|-------------------|--------------|--------------|--------------|-------------|-------------|--------------|--------------|
| PI4K2A            | -1.194251644 | 4.644520466  | -5.097918191 | 4.08E-07    | 2.72E-06    | 5.883450582  | -2.288261045 |
| CHRNE             | -1.195168358 | 2.352184712  | -7.613809413 | 5.95E-14    | 3.47E-12    | 21.07955839  | -2.289715509 |
| KLF11             | -1.195201583 | 5.062086871  | -4.691435445 | 3.07E-06    | 1.57E-05    | 3.960567218  | -2.289768241 |
| MREG              | -1.195214903 | 1.494473813  | -4.579594066 | 5.22E-06    | 2.50E-05    | 3.458314735  | -2.289789381 |
| BAI2              | -1.195782906 | -2.171643924 | -5.07510183  | 4.58E-07    | 3.02E-06    | 5.771485971  | -2.290691072 |
| RP11-277P12.6     | -1.196796188 | -1.175000958 | -4.332975407 | 1.61E-05    | 6.70E-05    | 2.391989883  | -2.292300512 |
| CD164L2           | -1.197044468 | -3.374396881 | -4.303042372 | 1.84E-05    | 7.54E-05    | 2.266435046  | -2.292695038 |
| PLXNA1            | -1.197183473 | 3.647940857  | -6.227631554 | 6.86E-10    | 1.06E-08    | 12.0174603   | -2.292915951 |
| CCDC68            | -1.197838612 | -2.123132794 | -3.533051769 | 0.000428794 | 0.001192498 | -0.672980326 | -2.293957419 |
| IGHV3-7           | -1.197935573 | -0.374573262 | -4.242866374 | 2.40E-05    | 9.51E-05    | 2.016566923  | -2.294111596 |
| CCDC89            | -1.198196405 | -3.248646189 | -4.052381726 | 5.45E-05    | 0.00019425  | 1.248050747  | -2.294526398 |
| XXbac-BPG154L12.4 | -1.198417623 | -1.337334866 | -4.121292304 | 4.07E-05    | 0.000150727 | 1.52213103   | -2.29487826  |
| ZAP70             | -1.198559088 | 4.643867126  | -5.355622853 | 1.05E-07    | 8.30E-07    | 7.181133768  | -2.295103298 |
| HIST1H3C          | -1.198960511 | 4.904991313  | -5.742866834 | 1.22E-08    | 1.29E-07    | 9.244599602  | -2.295741988 |
| LRRN4CL           | -1.199479062 | -1.756603518 | -4.52861062  | 6.62E-06    | 3.07E-05    | 3.233220762  | -2.2965673   |
| IGLV3-19          | -1.200265093 | -1.129778587 | -4.436258601 | 1.01E-05    | 4.45E-05    | 2.831652329  | -2.297818892 |
| RGS22             | -1.200558035 | -3.226120186 | -4.410383659 | 1.14E-05    | 4.95E-05    | 2.720569802  | -2.298285515 |
| TBR1              | -1.200642902 | -2.646677494 | -3.694111558 | 0.000232119 | 0.000693663 | -0.104595122 | -2.298420716 |
| ZNF883            | -1.200674628 | -3.577908473 | -3.819893436 | 0.000141397 | 0.000448857 | 0.356444523  | -2.298471261 |
| TNXB              | -1.201082798 | 3.760275122  | -5.017647623 | 6.15E-07    | 3.90E-06    | 5.491663252  | -2.299121642 |
| KLF1              | -1.202145115 | 2.554896759  | -3.361207015 | 0.000804192 | 0.002069601 | -1.252143658 | -2.300815205 |
| HLA-P             | -1.202929567 | -2.903041163 | -2.830727547 | 0.004733496 | 0.009903791 | -2.861326018 | -2.302066591 |
| SKAP1             | -1.20303984  | 1.677074345  | -5.187575504 | 2.56E-07    | 1.81E-06    | 6.328038751  | -2.302242558 |
| TACC2             | -1.203107358 | -2.78203781  | -3.166580001 | 0.001587216 | 0.003783339 | -1.873954781 | -2.302350305 |
| BCAM              | -1.203117194 | 1.119087531  | -4.245385005 | 2.38E-05    | 9.41E-05    | 2.026956892  | -2.302366002 |
| HOXA13            | -1.203255992 | -3.655857447 | -2.527771905 | 0.01162574  | 0.021970622 | -3.658510655 | -2.302587518 |
| RP3-441A12.1      | -1.203290389 | -1.281364003 | -6.571781335 | 7.84E-11    | 1.63E-09    | 14.11227358  | -2.302642417 |
| UBTFL6            | -1.203560622 | -3.124903562 | -4.07087281  | 5.04E-05    | 0.000181416 | 1.321156702  | -2.303073768 |
| CCNI2             | -1.20392489  | -2.65978866  | -4.730806718 | 2.54E-06    | 1.34E-05    | 4.140137511  | -2.303655347 |
| LPAR5             | -1.204102564 | 2.157529999  | -5.895837946 | 5.03E-09    | 5.94E-08    | 10.09695143  | -2.30393907  |
| ANK2              | -1.205514468 | -2.474853317 | -3.870021179 | 0.000115587 | 0.000376436 | 0.544363915  | -2.306194941 |
| KIAA1377          | -1.205658715 | -1.374094074 | -4.346872226 | 1.52E-05    | 6.34E-05    | 2.450565671  | -2.306425536 |
| GLB1L3            | -1.205952294 | -2.538488542 | -4.697916669 | 2.98E-06    | 1.53E-05    | 3.990028894  | -2.306894926 |
| WNT9A             | -1.207556251 | -2.860594983 | -3.392364323 | 0.000718961 | 0.001873477 | -1.149229825 | -2.309461108 |
| SLCO2B1           | -1.207898352 | -1.399332639 | -3.540987268 | 0.000416251 | 0.001162698 | -0.645554469 | -2.310008806 |
| RP11-800A3.5      | -1.208197055 | -1.171782033 | -3.977176135 | 7.46E-05    | 0.000256574 | 0.954043077  | -2.310487132 |
| TRPV6             | -1.208279241 | -0.714628722 | -3.546627209 | 0.000407546 | 0.001141778 | -0.626025777 | -2.310618758 |
| CAPN12            | -1.208466534 | 0.540681169  | -6.293903184 | 4.55E-10    | 7.52E-09    | 12.41275281  | -2.310918746 |
| SH2D2A            | -1.208539262 | 1.456628487  | -6.292273006 | 4.60E-10    | 7.57E-09    | 12.40298274  | -2.311035245 |
| RP11-178C3.2      | -1.209276186 | -1.336651266 | -6.423132646 | 2.03E-10    | 3.72E-09    | 13.1947017   | -2.312216016 |
| GIMAP5            | -1.209736344 | 2.593277047  | -5.895986912 | 5.03E-09    | 5.93E-08    | 10.09779168  | -2.312953632 |
| RP11-755B10.3     | -1.210096006 | -0.544342939 | -5.916053765 | 4.47E-09    | 5.35E-08    | 10.2111612   | -2.31353032  |
| RP11-23J18.1      | -1.210224004 | -2.166980836 | -4.940924768 | 9.05E-07    | 5.45E-06    | 5.122727919  | -2.313735588 |
| LSAMP             | -1.211073534 | -4.448576808 | -3.683594084 | 0.000241784 | 0.000718938 | -0.142465035 | -2.315098431 |
| PCDHB12           | -1.211084612 | -4.236348059 | -4.006055735 | 6.61E-05    | 0.000230669 | 1.066313235  | -2.315116208 |
| RIC3              | -1.211455369 | 0.031235721  | -5.65257635  | 2.04E-08    | 2.02E-07    | 8.751366496  | -2.315711245 |
| MAP9              | -1.212040147 | 0.128670403  | -4.548995104 | 6.02E-06    | 2.83E-05    | 3.322928664  | -2.316650078 |
| RP11-1024P17.1    | -1.212571234 | 1.590569072  | -6.454852559 | 1.66E-10    | 3.09E-09    | 13.38887714  | -2.317503044 |
| CCR7              | -1.212862902 | 3.613135582  | -4.631381126 | 4.09E-06    | 2.02E-05    | 3.689432943  | -2.317971619 |
| DUSP15            | -1.213067062 | -2.359912766 | -3.881090117 | 0.000110522 | 0.000362152 | 0.586180052  | -2.318299665 |
| KCNK12            | -1.213675825 | -2.93010444  | -3.493918066 | 0.000495983 | 0.001353966 | -0.807351638 | -2.319278106 |
| LAMB1             | -1.213752932 | -1.45976722  | -3.344654617 | 0.000853202 | 0.0021815   | -1.306439039 | -2.319402067 |
| AKR1C2            | -1.214133807 | -1.979356738 | -3.501963854 | 0.000481414 | 0.001319856 | -0.779844579 | -2.320014475 |
| RP11-476B13.2     | -1.214334804 | -1.927595614 | -5.162606784 | 2.92E-07    | 2.03E-06    | 6.20348558   | -2.320337724 |
| ZFP36L1           | -1.214371417 | 5.703854431  | -5.686466049 | 1.68E-08    | 1.71E-07    | 8.935636635  | -2.320396611 |
| LDLOC1            | -1.214416095 | -3.136587305 | -4.109030586 | 4.28E-05    | 0.000157666 | 1.473034949  | -2.320468471 |
| CDKL4             | -1.214435535 | -1.794623557 | -4.795308169 | 1.86E-06    | 1.02E-05    | 4.43742911   | -2.320499738 |
| IGKV2-30          | -1.215667396 | -1.905139616 | -4.759174992 | 2.22E-06    | 1.18E-05    | 4.27041425   | -2.32248197  |
| ATXN1             | -1.215676216 | 5.620187579  | -5.324818851 | 1.24E-07    | 9.58E-07    | 7.022829238  | -2.322496168 |
| RHAG              | -1.217091654 | 3.232913557  | -2.613668703 | 0.009086684 | 0.017671229 | -3.441517545 | -2.324775903 |
| CCDC109B          | -1.217557985 | 3.159708578  | -5.752797276 | 1.15E-08    | 1.23E-07    | 9.299294637  | -2.325527475 |

| gene          | logFC        | AveExpr      | t            | P.Value     | adj.P.Val   | B            | FoldChange   |
|---------------|--------------|--------------|--------------|-------------|-------------|--------------|--------------|
| CTSL1         | -1.217837027 | 1.848933753  | -3.850447878 | 0.000125085 | 0.000403175 | 0.470704043  | -2.325977317 |
| FAM46B        | -1.21796401  | -1.717703951 | -3.92767778  | 9.14E-05    | 0.000306513 | 0.76344952   | -2.326182053 |
| RNF182        | -1.218044109 | -0.616492262 | -2.566698848 | 0.010405865 | 0.019922944 | -3.561060059 | -2.326311207 |
| RP11-793H13.3 | -1.218355294 | -3.182990473 | -4.211303151 | 2.76E-05    | 0.000107259 | 1.886865869  | -2.32681304  |
| AC011816.1    | -1.218661676 | -1.316483613 | -5.543180667 | 3.76E-08    | 3.43E-07    | 8.163614787  | -2.327307233 |
| ZNF233        | -1.218787192 | -1.237356215 | -5.500552742 | 4.76E-08    | 4.20E-07    | 7.937516317  | -2.327509719 |
| TGM2          | -1.218810112 | 2.737767642  | -3.891945993 | 0.000105758 | 0.000348686 | 0.627303936  | -2.327546696 |
| HAPLN3        | -1.219036095 | 2.192180549  | -5.544226764 | 3.74E-08    | 3.42E-07    | 8.169183961  | -2.32791131  |
| CSPG4         | -1.219053405 | 0.554054206  | -2.347674574 | 0.019077275 | 0.034028241 | -4.090211039 | -2.327939242 |
| COX6B2        | -1.219804065 | -2.375607034 | -4.109584186 | 4.27E-05    | 0.000157353 | 1.475248519  | -2.329150825 |
| GADD45G       | -1.220417268 | 1.993500686  | -3.7828987   | 0.000163833 | 0.0005116   | 0.219285735  | -2.330141018 |
| AC104698.1    | -1.221989477 | 3.92791863   | -6.447103986 | 1.74E-10    | 3.24E-09    | 13.34136232  | -2.332681726 |
| SULT1C4       | -1.222022609 | 0.161907483  | -2.979654936 | 0.002952643 | 0.00651497  | -2.436906786 | -2.332735297 |
| LRRRC8E       | -1.222239911 | -3.272261972 | -3.856926231 | 0.000121863 | 0.00039427  | 0.495043746  | -2.333086685 |
| GPAT2         | -1.222308701 | -2.332601146 | -3.089702003 | 0.00205668  | 0.004744483 | -2.109553794 | -2.333197933 |
| RP11-618I10.1 | -1.222326432 | -3.183033124 | -3.025447424 | 0.002543544 | 0.0057237   | -2.30210615  | -2.333226608 |
| RP11-404O13.5 | -1.222381783 | -4.067667572 | -3.684066378 | 0.000241342 | 0.000717732 | -0.140766717 | -2.333316128 |
| CHPF          | -1.222499194 | 0.4431935    | -5.015922695 | 6.20E-07    | 3.92E-06    | 5.483309128  | -2.333506027 |
| LAMP3         | -1.22308763  | -2.141184139 | -4.83106511  | 1.56E-06    | 8.77E-06    | 4.603893965  | -2.334457995 |
| AC003080.4    | -1.223537264 | -1.660013587 | -4.159337701 | 3.45E-05    | 0.000130588 | 1.67536598   | -2.335185672 |
| CNR2          | -1.224175682 | 2.449298511  | -5.739754851 | 1.24E-08    | 1.31E-07    | 9.227477615  | -2.336219261 |
| CD5L          | -1.224293445 | -1.676528394 | -3.063847542 | 0.002241248 | 0.005115812 | -2.187509874 | -2.336409968 |
| TAS1R2        | -1.224365931 | -2.909329768 | -4.305601031 | 1.82E-05    | 7.46E-05    | 2.27713459   | -2.336527361 |
| JAG2          | -1.22472035  | 0.196939854  | -4.528771562 | 6.62E-06    | 3.07E-05    | 3.23392752   | -2.337101433 |
| AF131215.5    | -1.225030657 | -1.884955594 | -4.37753424  | 1.32E-05    | 5.62E-05    | 2.580447022  | -2.33760417  |
| CETP          | -1.225408755 | 0.301455099  | -3.990531706 | 7.05E-05    | 0.000244183 | 1.005865302  | -2.338216884 |
| PGPEP1L       | -1.225554017 | -4.379039696 | -3.702073491 | 0.000225045 | 0.000675066 | -0.075856932 | -2.338452326 |
| GPR111        | -1.225734466 | -3.261245622 | -4.000121368 | 6.78E-05    | 0.000235814 | 1.043178954  | -2.338744834 |
| IGHV1-8       | -1.227656638 | -1.903927265 | -3.609691767 | 0.000321138 | 0.000923571 | -0.405595534 | -2.341862932 |
| RP5-1071N3.1  | -1.22805801  | -0.821406601 | -4.675586076 | 3.32E-06    | 1.68E-05    | 3.888684986  | -2.342514553 |
| KLHL29        | -1.228203756 | -2.343630953 | -4.589174435 | 4.99E-06    | 2.41E-05    | 3.500882512  | -2.342751213 |
| ALPK2         | -1.228377815 | -2.061750354 | -4.253372929 | 2.29E-05    | 9.13E-05    | 2.059948412  | -2.343033879 |
| DTHD1         | -1.229424661 | -0.946860895 | -4.857258364 | 1.37E-06    | 7.82E-06    | 4.726585397  | -2.344734645 |
| BCAR1         | -1.230730705 | -1.971742785 | -3.880191695 | 0.000110925 | 0.000363353 | 0.582781674  | -2.346858248 |
| PPP1R13B      | -1.231052708 | 1.200539475  | -5.359358389 | 1.03E-07    | 8.16E-07    | 7.200389744  | -2.347382115 |
| WFDC1         | -1.234131549 | 0.252725851  | -3.472449483 | 0.000536897 | 0.00144941  | -0.880446316 | -2.352396989 |
| PHLDA3        | -1.234144589 | 0.641342095  | -4.751877419 | 2.30E-06    | 1.22E-05    | 4.236830098  | -2.352418252 |
| AC079779.4    | -1.234259843 | -2.186682948 | -5.468829363 | 5.67E-08    | 4.91E-07    | 7.770323758  | -2.352606189 |
| PSD3          | -1.234576406 | 3.255175573  | -3.849685385 | 0.00012547  | 0.000404282 | 0.467841909  | -2.353122465 |
| MFAP4         | -1.234693685 | 0.622334449  | -3.316491572 | 0.000943014 | 0.002386083 | -1.398216969 | -2.353313762 |
| RP11-317P15.4 | -1.234767305 | -2.962352691 | -4.057038773 | 5.34E-05    | 0.000190961 | 1.266432382  | -2.353433853 |
| C17orf96      | -1.234768665 | 0.057802982  | -4.429894857 | 1.04E-05    | 4.57E-05    | 2.804274429  | -2.353436073 |
| ADAMTS9       | -1.235142991 | -2.61977802  | -2.841656947 | 0.00457546  | 0.009620074 | -2.830906958 | -2.354046781 |
| RP11-690I21.2 | -1.235415838 | -0.357871614 | -5.891999547 | 5.15E-09    | 6.05E-08    | 10.07530758  | -2.354492028 |
| CTNNA3        | -1.235761878 | -3.150619641 | -3.090806703 | 0.002049114 | 0.004731456 | -2.106208589 | -2.355056836 |
| PEG10         | -1.236809976 | -0.833985636 | -4.558705574 | 5.76E-06    | 2.72E-05    | 3.365798528  | -2.356768374 |
| EPAS1         | -1.237590766 | 2.02274596   | -4.774374808 | 2.06E-06    | 1.11E-05    | 4.340523623  | -2.358044208 |
| MLLT3         | -1.237596984 | 3.757842896  | -5.010284646 | 6.38E-07    | 4.02E-06    | 5.456022155  | -2.358054371 |
| AC091633.3    | -1.237651095 | -1.032467604 | -6.769821488 | 2.15E-11    | 5.33E-10    | 15.3646667   | -2.358142817 |
| GZMM          | -1.238009496 | 1.091356949  | -6.621484375 | 5.68E-11    | 1.23E-09    | 14.4233854   | -2.35872871  |
| GRK7          | -1.238375716 | -0.685448623 | -4.890764896 | 1.16E-06    | 6.80E-06    | 4.884456451  | -2.359327537 |
| ATP8A2        | -1.23857306  | -1.824864091 | -3.727803558 | 0.000203545 | 0.000618853 | 0.017426305  | -2.359650287 |
| PCDHB13       | -1.238607185 | -2.405596181 | -3.435090787 | 0.000615691 | 0.001633946 | -1.00659308  | -2.359706101 |
| RIMS3         | -1.239081186 | 2.176724478  | -5.852343668 | 6.49E-09    | 7.40E-08    | 9.852468663  | -2.360481517 |
| AL163636.6    | -1.240336272 | -1.271596432 | -4.684712347 | 3.17E-06    | 1.62E-05    | 3.930047234  | -2.362535933 |
| CTD-2105E13.6 | -1.240512027 | -3.239081948 | -4.342542603 | 1.55E-05    | 6.44E-05    | 2.432296701  | -2.362823764 |
| SLC2A14       | -1.240642778 | 1.981329267  | -4.120910615 | 4.07E-05    | 0.00015086  | 1.520600609  | -2.363037916 |
| RP11-436A20.4 | -1.240656389 | 1.331409859  | -5.377040597 | 9.34E-08    | 7.51E-07    | 7.291710436  | -2.36306021  |
| TBC1D8B       | -1.241553222 | -1.970925654 | -3.302957143 | 0.000989227 | 0.002490872 | -1.442052802 | -2.364529632 |
| COL15A1       | -1.242223637 | -1.939374181 | -3.929217729 | 9.08E-05    | 0.000305    | 0.769344193  | -2.365628676 |
| FSTL1         | -1.242512579 | 0.331149698  | -3.743779713 | 0.000191184 | 0.000584877 | 0.075663622  | -2.366102511 |

| gene          | logFC        | AveExpr      | t            | P.Value     | adj.P.Val   | B            | FoldChange   |
|---------------|--------------|--------------|--------------|-------------|-------------|--------------|--------------|
| DHDH          | -1.244978998 | -2.154243108 | -5.231001207 | 2.04E-07    | 1.48E-06    | 6.546020246  | -2.370151038 |
| ST3GAL5       | -1.245124379 | 3.651753234  | -7.430652571 | 2.25E-13    | 1.08E-11    | 19.78799139  | -2.370389891 |
| SLC28A1       | -1.24536779  | -3.168487472 | -4.329586568 | 1.64E-05    | 6.79E-05    | 2.377733184  | -2.370789857 |
| CYP2U1        | -1.245844983 | 1.296925169  | -6.114873471 | 1.36E-09    | 1.90E-08    | 11.35381465  | -2.371574161 |
| PYGM          | -1.246300815 | 2.986849108  | -5.443467114 | 6.51E-08    | 5.51E-07    | 7.637312824  | -2.372323599 |
| HMGB1P20      | -1.247053129 | -1.476575115 | -5.079002092 | 4.49E-07    | 2.97E-06    | 5.790591516  | -2.373561002 |
| RP11-540O11.1 | -1.247191099 | -0.659397004 | -6.475120999 | 1.46E-10    | 2.76E-09    | 13.51341355  | -2.373788005 |
| BACH2         | -1.247839629 | 4.278273485  | -5.052212073 | 5.15E-07    | 3.35E-06    | 5.659641261  | -2.374855326 |
| SPATA18       | -1.248222018 | -3.149966148 | -3.8248932   | 0.000138597 | 0.000441169 | 0.375080791  | -2.37548487  |
| MAGI2         | -1.248328777 | -1.614496819 | -4.736840542 | 2.47E-06    | 1.30E-05    | 4.167784448  | -2.375660661 |
| MCF2L         | -1.24832996  | 1.167293723  | -4.93425454  | 9.36E-07    | 5.61E-06    | 5.090909026  | -2.37566261  |
| AC110769.3    | -1.248390422 | -0.780921567 | -5.360235967 | 1.02E-07    | 8.14E-07    | 7.204915336  | -2.375762174 |
| ICAM5         | -1.24843386  | 1.32133252   | -3.969607011 | 7.69E-05    | 0.000263583 | 0.924748194  | -2.375833706 |
| KLHL25        | -1.248718116 | 1.385441769  | -7.441373628 | 2.08E-13    | 1.01E-11    | 19.862816    | -2.376301866 |
| U91328.2      | -1.249858742 | 0.509301756  | -5.55416083  | 3.54E-08    | 3.25E-07    | 8.222119903  | -2.378181366 |
| MDK           | -1.249953216 | 2.275062872  | -6.456588602 | 1.64E-10    | 3.06E-09    | 13.3995299   | -2.378337103 |
| GYLTL1B       | -1.250262416 | -0.337384288 | -4.718540593 | 2.70E-06    | 1.40E-05    | 4.084038227  | -2.378846885 |
| RP11-44N11.1  | -1.250324424 | 1.690889329  | -6.151799901 | 1.09E-09    | 1.57E-08    | 11.5699075   | -2.378949133 |
| IL6           | -1.250634204 | -1.731528191 | -4.126003125 | 3.99E-05    | 0.000148029 | 1.541030856  | -2.379460002 |
| TNFRSF9       | -1.250810002 | 0.437724676  | -5.173945737 | 2.75E-07    | 1.92E-06    | 6.259977745  | -2.379749967 |
| CNRIP1        | -1.251388196 | 1.562330364  | -3.60425426  | 0.000327851 | 0.000940409 | -0.42475057  | -2.380703899 |
| FAM108A7P     | -1.25205293  | -3.953387728 | -3.154931746 | 0.001651336 | 0.003911615 | -1.910016948 | -2.381801082 |
| RP11-61L23.2  | -1.252539727 | -1.585078897 | -5.635690035 | 2.24E-08    | 2.19E-07    | 8.659936091  | -2.382604889 |
| SLC45A2       | -1.253173203 | -2.116612194 | -4.82333203  | 1.62E-06    | 9.07E-06    | 4.567792775  | -2.383651302 |
| REEP2         | -1.253304421 | -2.294759462 | -5.29437023  | 1.46E-07    | 1.11E-06    | 6.867200463  | -2.383868113 |
| SFRP1         | -1.254175743 | -3.568368989 | -3.744184452 | 0.00019088  | 0.00058431  | 0.07714215   | -2.385308296 |
| COL12A1       | -1.254601826 | -1.810298744 | -4.107402895 | 4.31E-05    | 0.000158557 | 1.466528297  | -2.386012871 |
| FKBP10        | -1.254941811 | -1.698878429 | -3.444585854 | 0.000594702 | 0.001585841 | -0.974658058 | -2.386575225 |
| CSDC2         | -1.255222492 | -3.60086747  | -3.868045485 | 0.000116514 | 0.000379204 | 0.536912359  | -2.387039586 |
| ADM2          | -1.255679577 | 0.158689719  | -4.410313214 | 1.14E-05    | 4.95E-05    | 2.720268231  | -2.387795984 |
| SEMA3B        | -1.25593771  | 1.776177891  | -5.530542123 | 4.04E-08    | 3.64E-07    | 8.096408418  | -2.388223258 |
| TMEM86A       | -1.256248915 | 1.024280184  | -6.174209434 | 9.51E-10    | 1.39E-08    | 11.70163703  | -2.388738479 |
| TEAD3         | -1.256283967 | -2.407431506 | -3.909922647 | 9.83E-05    | 0.000326808 | 0.695647774  | -2.388796517 |
| IL10RA        | -1.256707356 | 6.628376828  | -5.885331251 | 5.35E-09    | 6.24E-08    | 10.03773791  | -2.389497662 |
| CD40          | -1.256791249 | 2.110613828  | -5.770217277 | 1.04E-08    | 1.12E-07    | 9.395454791  | -2.389636616 |
| LNX1          | -1.2569894   | -1.975538139 | -4.074312852 | 4.97E-05    | 0.000178993 | 1.334792732  | -2.38996485  |
| FAM184A       | -1.257047124 | -1.542004844 | -4.768463894 | 2.12E-06    | 1.14E-05    | 4.313234028  | -2.390060476 |
| SCN9A         | -1.257545472 | -0.540013166 | -2.740566262 | 0.006238175 | 0.012645589 | -3.107860718 | -2.390886215 |
| ACTN3         | -1.257866622 | -1.797284667 | -5.173295357 | 2.76E-07    | 1.93E-06    | 6.256734287  | -2.391418495 |
| CNN2P1        | -1.258672256 | -4.486223336 | -4.10790257  | 4.31E-05    | 0.000158307 | 1.468525468  | -2.392754291 |
| HCG11         | -1.259099933 | 3.136372229  | -5.531019404 | 4.03E-08    | 3.64E-07    | 8.098943768  | -2.393463712 |
| PIK3IP1       | -1.259325516 | 6.293157077  | -6.519982975 | 1.09E-10    | 2.16E-09    | 13.79034048  | -2.393837989 |
| GRIN2C        | -1.260523139 | -2.831655155 | -4.636981943 | 3.98E-06    | 1.98E-05    | 3.714577986  | -2.395826007 |
| TRBV29-1      | -1.261029158 | -2.75276232  | -5.050036669 | 5.21E-07    | 3.38E-06    | 5.649036763  | -2.39666648  |
| CCDC42B       | -1.26105831  | -3.947234819 | -4.246937672 | 2.36E-05    | 9.36E-05    | 2.033364991  | -2.39671491  |
| COL1A2        | -1.261346157 | -0.677745282 | -2.739389219 | 0.006260391 | 0.012686715 | -3.111027205 | -2.39719315  |
| ACO69363.1    | -1.261779808 | -2.503224024 | -5.177312679 | 2.70E-07    | 1.89E-06    | 6.276774954  | -2.397913818 |
| RP11-561B11.1 | -1.261846734 | -1.977292104 | -4.627385704 | 4.17E-06    | 2.06E-05    | 3.671513185  | -2.398025058 |
| GPR176        | -1.262024471 | -1.672259551 | -4.547601653 | 6.06E-06    | 2.84E-05    | 3.316784046  | -2.398320507 |
| TRBV23-1      | -1.264352611 | -2.429789853 | -5.044468223 | 5.36E-07    | 3.46E-06    | 5.621911912  | -2.402193907 |
| LMX1B         | -1.264743327 | -4.358633026 | -3.560068232 | 0.000387483 | 0.00109037  | -0.579363032 | -2.402844566 |
| PNMA5         | -1.266849553 | -3.537635806 | -3.675500821 | 0.000249478 | 0.000739141 | -0.171534572 | -2.406355099 |
| PROX1         | -1.267962034 | -3.964563504 | -3.867906107 | 0.00011658  | 0.000379293 | 0.536386816  | -2.408211387 |
| NPHP3-AS1     | -1.268139757 | -2.080514372 | -5.925363335 | 4.23E-09    | 5.10E-08    | 10.26387866  | -2.408508068 |
| LBH           | -1.268561913 | 4.743844367  | -6.982757385 | 5.15E-12    | 1.60E-10    | 16.7491475   | -2.40921294  |
| TLL2          | -1.268616433 | -2.627696659 | -4.675973158 | 3.31E-06    | 1.68E-05    | 3.890437758  | -2.409303987 |
| SYNJ2-IT1     | -1.268630334 | -2.139870918 | -5.126703041 | 3.51E-07    | 2.39E-06    | 6.025384887  | -2.409327203 |
| DDR1          | -1.268821216 | 0.620693033  | -4.287399328 | 1.98E-05    | 8.02E-05    | 2.201153967  | -2.409645999 |
| APOC4         | -1.26954168  | 0.726852701  | -2.850808535 | 0.00444683  | 0.009380619 | -2.805347196 | -2.410849647 |
| RP13-270P17.2 | -1.269856622 | -0.838865963 | -6.802354797 | 1.73E-11    | 4.47E-10    | 15.57366055  | -2.411375996 |
| CD8B          | -1.27030784  | 0.197476514  | -5.111200153 | 3.81E-07    | 2.56E-06    | 5.948847805  | -2.412130296 |

| gene           | logFC        | AveExpr      | t            | P.Value     | adj.P.Val   | B            | FoldChange   |
|----------------|--------------|--------------|--------------|-------------|-------------|--------------|--------------|
| GALNTL4        | -1.270594156 | -3.485119048 | -3.867567798 | 0.000116739 | 0.000379687 | 0.53511126   | -2.412609054 |
| TPRG1          | -1.271249201 | -1.622903821 | -3.732758151 | 0.000199633 | 0.000608273 | 0.035461179  | -2.413704729 |
| CRB2           | -1.271328667 | -2.558062784 | -5.384696063 | 8.97E-08    | 7.24E-07    | 7.331335699  | -2.413837684 |
| POU5F1B        | -1.271644658 | -2.884068713 | -4.871945846 | 1.28E-06    | 7.35E-06    | 4.7956601    | -2.414366441 |
| ERBB4          | -1.272375747 | -4.05187222  | -3.777679567 | 0.000167256 | 0.000520559 | 0.200040167  | -2.415590236 |
| RP11-179H18.5  | -1.27252359  | -2.636787455 | -4.392611263 | 1.23E-05    | 5.30E-05    | 2.644634433  | -2.415837792 |
| NRXN3          | -1.272904383 | -1.670880297 | -3.914354524 | 9.65E-05    | 0.000321491 | 0.712543912  | -2.416475525 |
| LILRP1         | -1.273052389 | -2.281463676 | -3.79877333  | 0.000153823 | 0.000484251 | 0.277982295  | -2.416723444 |
| PCGF2          | -1.273468721 | -2.301709528 | -3.710492742 | 0.000217785 | 0.000656283 | -0.045402543 | -2.417420961 |
| AC005789.11    | -1.273639723 | -1.702982229 | -5.011908089 | 6.33E-07    | 4.00E-06    | 5.46387628   | -2.417707515 |
| EFNA5          | -1.273813018 | -2.937928949 | -3.866431856 | 0.000117276 | 0.000381182 | 0.530829112  | -2.417997943 |
| CD3E           | -1.273885418 | 3.032438412  | -5.434407799 | 6.84E-08    | 5.75E-07    | 7.589943215  | -2.418119291 |
| EFNA1          | -1.274191545 | 0.359149157  | -4.200918774 | 2.89E-05    | 0.000111422 | 1.844398457  | -2.418632449 |
| IRF6           | -1.274789411 | -1.270046325 | -3.755601139 | 0.000182496 | 0.000561609 | 0.118911861  | -2.41963496  |
| AF131215.3     | -1.275148815 | -2.272761918 | -4.67803298  | 3.28E-06    | 1.66E-05    | 3.899767305  | -2.420237814 |
| S100A16        | -1.275938866 | -1.511900001 | -2.68058462  | 0.007465349 | 0.014815038 | -3.267516617 | -2.421563552 |
| ZCCHC12        | -1.276001112 | -2.79981614  | -4.456383207 | 9.24E-06    | 4.11E-05    | 2.918480704  | -2.421668034 |
| ALDH1A1        | -1.276210785 | 0.567950272  | -3.014077736 | 0.002639964 | 0.005910332 | -2.335763932 | -2.422020011 |
| SFN            | -1.276560504 | -0.839335853 | -4.777041678 | 2.03E-06    | 1.10E-05    | 4.352846654  | -2.422607197 |
| PCDHB14        | -1.276639938 | -2.61497385  | -3.661061865 | 0.000263778 | 0.000777073 | -0.223242001 | -2.422740588 |
| ABCB4          | -1.276913625 | -0.054017921 | -5.131385424 | 3.43E-07    | 2.34E-06    | 6.048544917  | -2.423200238 |
| HRC            | -1.277908396 | -4.068584397 | -3.274937506 | 0.001091646 | 0.002712596 | -1.532246066 | -2.424871666 |
| RAB43          | -1.278244763 | 3.590958053  | -7.970644345 | 4.12E-15    | 3.40E-13    | 23.67622178  | -2.425437095 |
| TPTE2P6        | -1.278745801 | -3.234821106 | -3.662145243 | 0.000262679 | 0.000774182 | -0.219369191 | -2.426279578 |
| RAPSN          | -1.27884031  | 0.73360644   | -5.662140001 | 1.93E-08    | 1.92E-07    | 8.803262599  | -2.426438527 |
| AC006001.1     | -1.279323729 | -0.149822603 | -6.991122221 | 4.86E-12    | 1.52E-10    | 16.80433161  | -2.427251714 |
| AP001187.9     | -1.279774776 | -0.308342784 | -4.80236662  | 1.80E-06    | 9.88E-06    | 4.470195753  | -2.428010694 |
| RGL1           | -1.279862418 | 0.643310986  | -4.956423097 | 8.38E-07    | 5.08E-06    | 5.196817634  | -2.428158197 |
| ZCCHC18        | -1.279902084 | -0.220763627 | -5.618322987 | 2.47E-08    | 2.39E-07    | 8.566171053  | -2.428224958 |
| HES6           | -1.279914525 | 2.667684272  | -5.256185532 | 1.78E-07    | 1.32E-06    | 6.673225905  | -2.428245899 |
| ABCG4          | -1.279933398 | -2.855067577 | -4.736823787 | 2.47E-06    | 1.30E-05    | 4.16770763   | -2.428277665 |
| PTRF           | -1.280500484 | 1.573472902  | -3.002946131 | 0.002737595 | 0.006101396 | -2.368596286 | -2.429232345 |
| CTSH           | -1.280807716 | 3.738876204  | -4.46593952  | 8.84E-06    | 3.96E-05    | 2.959844186  | -2.429749723 |
| RP11-1151B14.4 | -1.281325103 | -0.825735144 | -4.308029332 | 1.80E-05    | 7.39E-05    | 2.28729469   | -2.430621248 |
| TANC1          | -1.281654063 | 2.616825935  | -3.548023773 | 0.000405417 | 0.001136459 | -0.621185392 | -2.431175536 |
| RP11-414J4.2   | -1.28274009  | -0.734534132 | -5.180151757 | 2.66E-07    | 1.87E-06    | 6.290946778  | -2.433006357 |
| SLC7A2         | -1.282758815 | -2.280601555 | -3.232280783 | 0.001266558 | 0.003090947 | -1.668109928 | -2.433037937 |
| MEST           | -1.282976573 | 4.443408542  | -3.87419934  | 0.00011365  | 0.000370862 | 0.560134508  | -2.433405202 |
| RP11-448G15.3  | -1.283569831 | 3.527294693  | -7.32480351  | 4.78E-13    | 2.07E-11    | 19.05445544  | -2.434406061 |
| GRK5           | -1.283768089 | 3.155231598  | -6.677757723 | 3.94E-11    | 8.92E-10    | 14.77822059  | -2.434740625 |
| ASPG           | -1.284270916 | -4.09197666  | -4.397145858 | 1.21E-05    | 5.21E-05    | 2.663981144  | -2.43558936  |
| ARHGEF26       | -1.285308334 | -3.110656764 | -3.776079158 | 0.000168319 | 0.000523124 | 0.194143835  | -2.437341383 |
| ZNF876P        | -1.285645874 | -0.485790337 | -5.582209713 | 3.03E-08    | 2.84E-07    | 8.372066423  | -2.437911702 |
| KCNJ11         | -1.285670215 | -2.137744107 | -4.641466427 | 3.90E-06    | 1.94E-05    | 3.734732227  | -2.437952834 |
| MCC            | -1.286115923 | -1.069158255 | -4.941427309 | 9.03E-07    | 5.44E-06    | 5.12512684   | -2.438706135 |
| FAM59B         | -1.286965    | 0.372543156  | -6.234140888 | 6.59E-10    | 1.03E-08    | 12.05611496  | -2.440141821 |
| RNF152         | -1.287521271 | 0.082329085  | -4.1605097   | 3.44E-05    | 0.000130055 | 1.680108045  | -2.441082867 |
| RP11-390K5.3   | -1.288268969 | -2.411914705 | -4.884955473 | 1.20E-06    | 6.95E-06    | 4.857010225  | -2.442348322 |
| HMX2           | -1.288491355 | -4.521293072 | -3.0619549   | 0.002255338 | 0.005143195 | -2.193191284 | -2.442724829 |
| AC004019.13    | -1.289945557 | -2.047145363 | -5.155187647 | 3.03E-07    | 2.10E-06    | 6.166586148  | -2.44518828  |
| ATG9B          | -1.29008081  | -0.287140032 | -6.871096279 | 1.09E-11    | 3.08E-10    | 16.01826502  | -2.445417527 |
| NOSTRIN        | -1.290387145 | 0.143806017  | -5.214003768 | 2.23E-07    | 1.60E-06    | 6.460493881  | -2.445936831 |
| CTC-349C3.2    | -1.290406836 | -3.125595529 | -3.970462004 | 7.67E-05    | 0.000262839 | 0.928054571  | -2.445970215 |
| CDKL2          | -1.290413084 | -2.160173283 | -4.731066055 | 2.54E-06    | 1.33E-05    | 4.141325095  | -2.445980808 |
| THSD4          | -1.291338067 | -3.655148743 | -3.106990455 | 0.001941168 | 0.004510717 | -2.057067098 | -2.44754955  |
| ENPP4          | -1.29188884  | 3.760383488  | -5.543353195 | 3.76E-08    | 3.43E-07    | 8.164533219  | -2.448484122 |
| TRAV26-1       | -1.292062194 | -3.103498564 | -4.891367376 | 1.16E-06    | 6.79E-06    | 4.887304607  | -2.448778348 |
| ZNF683         | -1.292735933 | -1.885890101 | -4.62226944  | 4.27E-06    | 2.10E-05    | 3.64858803   | -2.449922196 |
| ZNF774         | -1.292835214 | -1.124970211 | -6.431849196 | 1.92E-10    | 3.54E-09    | 13.24797267  | -2.450090795 |
| RP11-342M3.5   | -1.292890601 | -3.033396668 | -4.673623618 | 3.35E-06    | 1.69E-05    | 3.879800799  | -2.450184861 |
| AC106900.6     | -1.293072904 | -0.914379768 | -6.421326323 | 2.05E-10    | 3.76E-09    | 13.18367074  | -2.450494492 |













| gene          | logFC        | AveExpr      | t            | P.Value     | adj.P.Val   | B            | FoldChange   |
|---------------|--------------|--------------|--------------|-------------|-------------|--------------|--------------|
| HPN           | -1.458888912 | -2.762331661 | -5.200715745 | 2.39E-07    | 1.70E-06    | 6.393816163  | -2.748965711 |
| SLC6A20       | -1.459304685 | -3.052748172 | -4.939925667 | 9.10E-07    | 5.47E-06    | 5.11795931   | -2.749758056 |
| MAOB          | -1.46107033  | -3.675236858 | -4.743720876 | 2.39E-06    | 1.26E-05    | 4.199351259  | -2.753125413 |
| YPEL4         | -1.462202064 | 2.450996097  | -4.635995287 | 4.00E-06    | 1.99E-05    | 3.710146248  | -2.755285971 |
| WSCD1         | -1.46220302  | -3.229475355 | -3.374282913 | 0.000767339 | 0.001984858 | -1.209066545 | -2.755287797 |
| DBH-AS1       | -1.462529051 | -0.407743308 | -5.58657726  | 2.95E-08    | 2.77E-07    | 8.395478872  | -2.755910527 |
| HIST2H2BB     | -1.462796455 | -2.008266941 | -4.44947823  | 9.53E-06    | 4.22E-05    | 2.8886463    | -2.756421384 |
| TMEM151B      | -1.462871482 | -3.457903823 | -4.963582705 | 8.08E-07    | 4.92E-06    | 5.231118816  | -2.756564734 |
| ZNF354C       | -1.462913615 | 0.486884237  | -5.24744815  | 1.87E-07    | 1.38E-06    | 6.62902791   | -2.756645241 |
| PPARD         | -1.462915928 | 3.742658487  | -7.656348739 | 4.35E-14    | 2.62E-12    | 21.38355601  | -2.75664966  |
| ANKFN1        | -1.463410369 | -3.223223102 | -4.107357453 | 4.32E-05    | 0.000158557 | 1.466346678  | -2.757594581 |
| RP3-453I5.2   | -1.463646398 | -1.29592239  | -5.479712096 | 5.34E-08    | 4.65E-07    | 7.827576526  | -2.758045769 |
| GPM6B         | -1.464226703 | -0.511809803 | -2.933119075 | 0.003429192 | 0.007446526 | -2.571825236 | -2.759155379 |
| TNF           | -1.468016305 | 3.438704982  | -4.989285374 | 7.10E-07    | 4.39E-06    | 5.354647301  | -2.766412522 |
| MATN1         | -1.468022421 | 0.395647657  | -6.512358211 | 1.15E-10    | 2.26E-09    | 13.74314962  | -2.766424252 |
| APBB2         | -1.468423647 | 0.655841686  | -4.211727859 | 2.75E-05    | 0.000107145 | 1.88860489   | -2.767193725 |
| ZNF662        | -1.468656406 | 1.650161385  | -4.344680175 | 1.53E-05    | 6.39E-05    | 2.441314055  | -2.76764021  |
| CTRC          | -1.468800435 | -0.392402312 | -5.484307159 | 5.21E-08    | 4.54E-07    | 7.851782844  | -2.767916526 |
| PLA2G7        | -1.469729627 | -2.812420586 | -4.487931015 | 7.99E-06    | 3.61E-05    | 3.055355756  | -2.769699822 |
| RP11-231D20.2 | -1.471069841 | -1.375835775 | -5.968469283 | 3.28E-09    | 4.10E-08    | 10.50898421  | -2.772273974 |
| MET           | -1.471711101 | -2.726909912 | -4.149556003 | 3.60E-05    | 0.000135628 | 1.635838302  | -2.773506489 |
| COL6A2        | -1.473059832 | 1.636808006  | -5.67316242  | 1.82E-08    | 1.83E-07    | 8.863176785  | -2.776100567 |
| RHCE          | -1.473438832 | 1.473977275  | -4.285928431 | 1.99E-05    | 8.07E-05    | 2.195027465  | -2.776829953 |
| RP11-881M11.2 | -1.474762659 | -2.068015167 | -6.56517365  | 8.18E-11    | 1.69E-09    | 14.07107562  | -2.779379161 |
| KBTBD12       | -1.475686278 | -3.555209317 | -3.937618643 | 8.78E-05    | 0.00029659  | 0.801541     | -2.781159099 |
| COL6A1        | -1.475808034 | 0.908959005  | -4.986331279 | 7.20E-07    | 4.45E-06    | 5.340418829  | -2.781393825 |
| MAF           | -1.47592912  | 1.612289037  | -6.699815867 | 3.41E-11    | 7.87E-10    | 14.91806085  | -2.781627278 |
| IRS1          | -1.476492452 | 0.940604757  | -5.918855269 | 4.39E-09    | 5.28E-08    | 10.22701718  | -2.782713637 |
| A2M           | -1.476918189 | -0.140144362 | -4.14113153  | 3.74E-05    | 0.000139955 | 1.601867294  | -2.783534933 |
| FRMD6         | -1.477006534 | -0.70448503  | -4.413128475 | 1.12E-05    | 4.90E-05    | 2.732323783  | -2.783705392 |
| PRRT2         | -1.477460497 | -2.286706998 | -6.097148183 | 1.52E-09    | 2.09E-08    | 11.25051628  | -2.784581458 |
| IGSF9         | -1.477474867 | -1.977325169 | -4.882355132 | 1.21E-06    | 7.03E-06    | 4.844735182  | -2.784609195 |
| CCDC50        | -1.477477037 | 4.523516176  | -4.998886997 | 6.76E-07    | 4.22E-06    | 5.400949202  | -2.784613384 |
| RP11-274K13.5 | -1.477678023 | -3.118469859 | -2.807168904 | 0.005091095 | 0.010557438 | -2.926502652 | -2.785001343 |
| FAM3B         | -1.477857146 | -4.151982961 | -4.643753727 | 3.86E-06    | 1.92E-05    | 3.745019045  | -2.785347146 |
| RP11-11N9.4   | -1.478003182 | -1.664591098 | -3.934444224 | 8.89E-05    | 0.000299913 | 0.78936708   | -2.785629105 |
| ADAMTS1       | -1.478236789 | -1.909845259 | -3.827487192 | 0.000137165 | 0.000437182 | 0.38475905   | -2.786080202 |
| PRF1          | -1.478398823 | 3.001247168  | -6.095601895 | 1.53E-09    | 2.10E-08    | 11.24151815  | -2.786393133 |
| RP11-161M6.2  | -1.479136345 | -0.982572959 | -5.585899145 | 2.97E-08    | 2.78E-07    | 8.391842672  | -2.787817934 |
| SNX9          | -1.479366558 | 5.223100901  | -6.239391982 | 6.38E-10    | 9.97E-09    | 12.08732506  | -2.788262826 |
| C15orf48      | -1.479743458 | -0.49283646  | -4.746591547 | 2.36E-06    | 1.25E-05    | 4.212534797  | -2.788991345 |
| DFNB31        | -1.479964344 | 2.99943183   | -6.418708236 | 2.08E-10    | 3.81E-09    | 13.16768754  | -2.789418391 |
| SPSB1         | -1.48073058  | 0.144601279  | -5.355728087 | 1.05E-07    | 8.30E-07    | 7.181676053  | -2.790900284 |
| WBP5          | -1.481196357 | -1.398424128 | -3.572339179 | 0.000369977 | 0.001046182 | -0.536612027 | -2.791801479 |
| HGFAC         | -1.481587843 | -2.147583611 | -5.784969437 | 9.58E-09    | 1.05E-07    | 9.477101289  | -2.792559157 |
| DMPK          | -1.481593269 | 2.022704572  | -7.260930596 | 7.51E-13    | 3.04E-11    | 18.61640213  | -2.792569661 |
| RP11-136K14.2 | -1.48181774  | -2.782365304 | -5.424724501 | 7.22E-08    | 6.03E-07    | 7.539393284  | -2.793004194 |
| B3GNT4        | -1.484331558 | -3.149117311 | -4.980400447 | 7.42E-07    | 4.57E-06    | 5.311877075  | -2.797875095 |
| KANK3         | -1.486860361 | -0.253429255 | -7.612673221 | 6.00E-14    | 3.48E-12    | 21.0714596   | -2.802783602 |
| RP11-643M14.1 | -1.487295919 | -2.280208428 | -6.18694184  | 8.80E-10    | 1.31E-08    | 11.77667983  | -2.803629907 |
| TMCC2         | -1.487610706 | 4.706077719  | -4.393549914 | 1.23E-05    | 5.28E-05    | 2.648637578  | -2.804241708 |
| UGT8          | -1.487768644 | -0.233420494 | -5.534305289 | 3.95E-08    | 3.58E-07    | 8.116404213  | -2.804548717 |
| RP11-283I3.4  | -1.487910232 | -3.47348188  | -5.216806404 | 2.20E-07    | 1.58E-06    | 6.474577791  | -2.804823973 |
| TGFB3L        | -1.488186996 | -0.942168299 | -7.15396482  | 1.59E-12    | 5.65E-11    | 17.89057183  | -2.805362096 |
| FAM71F1       | -1.488380709 | -3.124404054 | -4.721998754 | 2.65E-06    | 1.38E-05    | 4.099840057  | -2.805738804 |
| IL2RB         | -1.489102457 | 2.149010329  | -6.21382779  | 7.46E-10    | 1.14E-08    | 11.93561272  | -2.807142803 |
| HSPB6         | -1.489353296 | -3.378613737 | -5.066187439 | 4.80E-07    | 3.14E-06    | 5.727870983  | -2.807630918 |
| MAGI2-AS3     | -1.489493512 | -2.634296741 | -4.100733464 | 4.44E-05    | 0.000162365 | 1.439893472  | -2.807903806 |
| GPR153        | -1.489713941 | 1.470184534  | -4.956605354 | 8.37E-07    | 5.08E-06    | 5.197690225  | -2.808332858 |
| SDC3          | -1.489862696 | 0.525161185  | -5.477878276 | 5.40E-08    | 4.69E-07    | 7.817921493  | -2.808622437 |
| STX1A         | -1.490020525 | 2.058622881  | -4.396248004 | 1.21E-05    | 5.23E-05    | 2.66014895   | -2.808929714 |

| gene          | logFC        | AveExpr      | t            | P.Value     | adj.P.Val   | B            | FoldChange   |
|---------------|--------------|--------------|--------------|-------------|-------------|--------------|--------------|
| SOX6          | -1.490111317 | 2.353976264  | -4.062997246 | 5.21E-05    | 0.000186732 | 1.289980632  | -2.809106492 |
| WHAMMP3       | -1.491309247 | 2.697596891  | -4.490977893 | 7.88E-06    | 3.57E-05    | 3.06862428   | -2.811439979 |
| TULP4         | -1.492675056 | 5.150918705  | -8.977810684 | 1.26E-18    | 2.31E-16    | 31.56494238  | -2.814102848 |
| FOXI1         | -1.49268337  | -2.636318401 | -4.471291901 | 8.63E-06    | 3.87E-05    | 2.983048637  | -2.814119065 |
| LPAR3         | -1.493334648 | -2.632187332 | -3.226715425 | 0.001291199 | 0.003145633 | -1.685707172 | -2.815389734 |
| ALOX15        | -1.493388834 | -0.620421677 | -3.355531419 | 0.000820694 | 0.002107671 | -1.270790361 | -2.815495478 |
| PEAR1         | -1.493560372 | 2.021657329  | -4.981098425 | 7.40E-07    | 4.56E-06    | 5.315234369  | -2.815830263 |
| MEX3A         | -1.494972625 | -0.815294195 | -4.36202653  | 1.42E-05    | 5.98E-05    | 2.514647886  | -2.818588027 |
| CTA-363E6.6   | -1.498201552 | -1.363998249 | -3.951214022 | 8.30E-05    | 0.000281965 | 0.853787136  | -2.824903435 |
| KCNMB4        | -1.498363298 | 0.700595377  | -5.572657144 | 3.19E-08    | 2.97E-07    | 8.320919493  | -2.825220163 |
| SPTB          | -1.498435441 | 4.966267447  | -3.793701035 | 0.000156957 | 0.000492702 | 0.259201462  | -2.825361443 |
| CD248         | -1.498685582 | -0.111188111 | -6.152022536 | 1.09E-09    | 1.57E-08    | 11.57121403  | -2.82585136  |
| NCR2          | -1.498913661 | -4.179493811 | -4.205752436 | 2.83E-05    | 0.000109492 | 1.864153348  | -2.82629814  |
| SYDE1         | -1.499296517 | -3.064866409 | -4.416950948 | 1.11E-05    | 4.82E-05    | 2.748704288  | -2.82704827  |
| PLAG1         | -1.49981145  | 1.270409887  | -5.450120756 | 6.28E-08    | 5.34E-07    | 7.672151024  | -2.828057493 |
| MAL           | -1.500950912 | 0.352292221  | -5.728805184 | 1.32E-08    | 1.39E-07    | 9.167302261  | -2.830292017 |
| HEY2          | -1.501171675 | -3.865113202 | -4.648739596 | 3.77E-06    | 1.88E-05    | 3.767459148  | -2.830725145 |
| LINC00565     | -1.501289539 | -0.827378709 | -5.453104029 | 6.18E-08    | 5.27E-07    | 7.687784362  | -2.830956417 |
| CNTD2         | -1.502109724 | 0.118400223  | -6.145289418 | 1.13E-09    | 1.63E-08    | 11.53172047  | -2.832566299 |
| DLL1          | -1.502190477 | 0.183708016  | -5.089934227 | 4.25E-07    | 2.82E-06    | 5.844217295  | -2.832724853 |
| RP11-553L6.2  | -1.502280976 | -2.114622182 | -6.701901319 | 3.36E-11    | 7.79E-10    | 14.93130369  | -2.832902552 |
| ANKRD36BP2    | -1.504041315 | 1.098794073  | -5.605402701 | 2.66E-08    | 2.53E-07    | 8.49659074   | -2.836361296 |
| BAAT          | -1.504864098 | -3.334408286 | -5.454116982 | 6.15E-08    | 5.25E-07    | 7.693094408  | -2.837979363 |
| TMEM119       | -1.505008235 | -0.531957522 | -6.419011606 | 2.08E-10    | 3.81E-09    | 13.16953928  | -2.838262913 |
| AC055876.1    | -1.505327498 | -3.92723531  | -3.762992619 | 0.000177254 | 0.000547185 | 0.146020718  | -2.838891079 |
| PCYT1B        | -1.507064497 | -0.409190136 | -4.129042153 | 3.93E-05    | 0.000146338 | 1.553234526  | -2.842311151 |
| RP11-13G14.4  | -1.50715201  | -2.610141231 | -4.715619461 | 2.74E-06    | 1.42E-05    | 4.070698954  | -2.84248357  |
| AC004893.10   | -1.508836236 | -0.326488479 | -5.60572886  | 2.65E-08    | 2.53E-07    | 8.498345366  | -2.84580387  |
| CTD-2535L24.2 | -1.509745514 | -0.785082263 | -5.329337889 | 1.21E-07    | 9.37E-07    | 7.0459989    | -2.847598041 |
| CACHD1        | -1.510248327 | 1.248992881  | -4.864585294 | 1.32E-06    | 7.59E-06    | 4.761018791  | -2.848590669 |
| PRTFDC1       | -1.510985729 | -2.084856431 | -4.115879944 | 4.16E-05    | 0.000153759 | 1.50044242   | -2.850047035 |
| MYO1C         | -1.511106649 | 3.596967297  | -7.287370027 | 6.23E-13    | 2.59E-11    | 18.79730944  | -2.850285924 |
| C3orf45       | -1.511832621 | -2.597388816 | -4.579216393 | 5.23E-06    | 2.50E-05    | 3.456638397  | -2.851720564 |
| CPT1C         | -1.512394446 | -2.027164039 | -5.738450883 | 1.25E-08    | 1.32E-07    | 9.22030583   | -2.852831319 |
| RP11-102F4.3  | -1.512793292 | -1.785592987 | -3.301914819 | 0.000992872 | 0.002498136 | -1.445421444 | -2.853620118 |
| RP11-215P8.1  | -1.51321992  | -2.057804432 | -5.357758145 | 1.04E-07    | 8.22E-07    | 7.192139239  | -2.854464104 |
| C1QB          | -1.517290404 | -0.340984588 | -3.798151275 | 0.000154204 | 0.000485197 | 0.275677743  | -2.862529189 |
| RP11-344E13.3 | -1.517936034 | -2.856878422 | -3.289599833 | 0.001036886 | 0.00259432  | -1.485142902 | -2.863810505 |
| PFN2          | -1.518360866 | -1.484657966 | -5.943246118 | 3.81E-09    | 4.67E-08    | 10.36536097  | -2.864653937 |
| RP11-844P9.2  | -1.519161848 | -2.400864646 | -3.828611238 | 0.000136549 | 0.000435923 | 0.388954881  | -2.86624483  |
| LOXL1         | -1.520184009 | -1.229709728 | -4.816008919 | 1.68E-06    | 9.34E-06    | 4.533656445  | -2.868276309 |
| B3GNT3        | -1.520315907 | -3.560852127 | -5.133216851 | 3.40E-07    | 2.32E-06    | 6.057608996  | -2.868538552 |
| HBG1          | -1.521352115 | 3.96506114   | -3.046987737 | 0.002369665 | 0.005375216 | -2.237998868 | -2.870599603 |
| AIRE          | -1.522163407 | -3.015696415 | -5.108368638 | 3.86E-07    | 2.59E-06    | 5.934892529  | -2.872214325 |
| LINC00189     | -1.523039452 | -2.866763893 | -3.580558834 | 0.000358668 | 0.001018144 | -0.507895148 | -2.873958944 |
| MFAP2         | -1.524205882 | -3.225886449 | -4.76906407  | 2.11E-06    | 1.13E-05    | 4.316003453  | -2.876283501 |
| RAI14         | -1.524491135 | -2.00278659  | -4.176475854 | 3.21E-05    | 0.000122289 | 1.744837906  | -2.876852262 |
| RP11-463O12.3 | -1.524492432 | -1.631829895 | -6.283258814 | 4.86E-10    | 7.90E-09    | 12.34900071  | -2.876854849 |
| KHDRBS3       | -1.524621881 | 0.068349456  | -5.151512283 | 3.09E-07    | 2.13E-06    | 6.148325215  | -2.877112993 |
| LRRC73        | -1.524924783 | -1.452699096 | -6.627341178 | 5.47E-11    | 1.19E-09    | 14.46018735  | -2.877717123 |
| CYGB          | -1.525011895 | -0.975414519 | -5.323502328 | 1.25E-07    | 9.63E-07    | 7.016082766  | -2.877890888 |
| SSTR3         | -1.526315945 | -0.362703561 | -5.881878153 | 5.46E-09    | 6.36E-08    | 10.01829853  | -2.880493385 |
| DMWD          | -1.526571238 | 2.550104511  | -7.921239477 | 6.00E-15    | 4.77E-13    | 23.31041666  | -2.881003151 |
| PTPRG         | -1.526666884 | -1.162168881 | -3.694497794 | 0.000231771 | 0.000692819 | -0.103202415 | -2.881194159 |
| APC2          | -1.526974807 | 0.577074653  | -5.098491874 | 4.06E-07    | 2.72E-06    | 5.886271915  | -2.881809174 |
| RP11-222A11.1 | -1.527149455 | -2.136588273 | -4.375856822 | 1.33E-05    | 5.66E-05    | 2.573318892  | -2.882158058 |
| REEP5         | -1.527152627 | 4.486263763  | -8.585667995 | 3.24E-17    | 4.51E-15    | 28.39670623  | -2.882164395 |
| SLFN13        | -1.527232545 | 4.430136565  | -7.821711513 | 1.27E-14    | 9.26E-13    | 22.57960726  | -2.882324057 |
| TRPM6         | -1.527587854 | 0.102477134  | -4.128868157 | 3.94E-05    | 0.000146419 | 1.552535587  | -2.883034006 |
| ABCG2         | -1.527992442 | 0.318818155  | -4.660806046 | 3.56E-06    | 1.79E-05    | 3.821862657  | -2.883842636 |
| IL13          | -1.528038298 | -1.164375111 | -7.231059969 | 9.26E-13    | 3.60E-11    | 18.41273157  | -2.883934299 |

| gene          | logFC        | AveExpr      | t            | P.Value     | adj.P.Val   | B            | FoldChange   |
|---------------|--------------|--------------|--------------|-------------|-------------|--------------|--------------|
| NFATC4        | -1.528316017 | -2.166692994 | -4.209205119 | 2.78E-05    | 0.000108136 | 1.878277702  | -2.88448951  |
| HIST1H2AJ     | -1.528842394 | 4.952010185  | -7.314497619 | 5.14E-13    | 2.22E-11    | 18.98354158  | -2.885542129 |
| FFAR1         | -1.529009659 | -0.759878145 | -5.14853892  | 3.14E-07    | 2.16E-06    | 6.133561205  | -2.885876696 |
| KIF21A        | -1.529436681 | -0.535735077 | -5.072825186 | 4.64E-07    | 3.05E-06    | 5.760340214  | -2.88673101  |
| LMAN1L        | -1.530123937 | -0.921674073 | -5.868141152 | 5.92E-09    | 6.81E-08    | 9.941071064  | -2.888106488 |
| IL21R-AS1     | -1.530263914 | -2.639861221 | -5.502379179 | 4.72E-08    | 4.17E-07    | 7.947169998  | -2.88838672  |
| CTLA4         | -1.531901214 | -0.766125595 | -5.541828617 | 3.79E-08    | 3.45E-07    | 8.156418261  | -2.89166658  |
| STRA6         | -1.531984863 | -4.104470404 | -4.878650046 | 1.23E-06    | 7.14E-06    | 4.827255909  | -2.891834247 |
| RP11-344A16.2 | -1.532450171 | -1.190751789 | -7.245839888 | 8.35E-13    | 3.32E-11    | 18.51341256  | -2.892767093 |
| RP11-87G24.3  | -1.534238473 | -3.491506862 | -4.865955386 | 1.31E-06    | 7.55E-06    | 4.767463128  | -2.896355063 |
| APLN          | -1.5349546   | -2.214730389 | -4.651295725 | 3.72E-06    | 1.86E-05    | 3.778972573  | -2.897793118 |
| C17orf107     | -1.535347266 | 3.447804118  | -6.340916216 | 3.40E-10    | 5.82E-09    | 12.69552149  | -2.898581932 |
| ELAVL4        | -1.536852772 | -4.124780254 | -4.332652203 | 1.62E-05    | 6.71E-05    | 2.390629716  | -2.90160829  |
| HSPB7         | -1.536901968 | -4.112178582 | -4.739375561 | 2.44E-06    | 1.29E-05    | 4.179409955  | -2.901707236 |
| MMEL1         | -1.536972102 | -1.162168136 | -5.147431985 | 3.16E-07    | 2.17E-06    | 6.128066871  | -2.901848302 |
| AC009237.1    | -1.537050937 | -3.050787606 | -4.655068022 | 3.66E-06    | 1.83E-05    | 3.795975     | -2.902006875 |
| PAQR9         | -1.537944471 | -0.804509948 | -3.687665639 | 0.000237998 | 0.000709285 | -0.127817198 | -2.90380479  |
| RP4-800J21.3  | -1.53801127  | -0.49636065  | -6.356823614 | 3.07E-10    | 5.34E-09    | 12.79164019  | -2.903939244 |
| AC006946.15   | -1.539598996 | -3.434535519 | -5.177493174 | 2.70E-07    | 1.89E-06    | 6.277675708  | -2.907136871 |
| HORMAD2       | -1.539701393 | -3.09829135  | -5.250349499 | 1.84E-07    | 1.36E-06    | 6.643696637  | -2.907343214 |
| FRK           | -1.53972122  | -3.726577342 | -4.147896852 | 3.63E-05    | 0.00013652  | 1.629142628  | -2.90738317  |
| BCL11B        | -1.539823168 | 4.039101808  | -5.934943183 | 4.00E-09    | 4.87E-08    | 10.31820745  | -2.907588628 |
| RGS1          | -1.539933572 | 4.030846584  | -6.557114127 | 8.62E-11    | 1.76E-09    | 14.02087726  | -2.907811144 |
| RP11-374A22.1 | -1.541270131 | -4.249890541 | -4.052899412 | 5.43E-05    | 0.000193862 | 1.250093071  | -2.91050628  |
| RP11-455F5.3  | -1.54145445  | -1.276617356 | -7.328278662 | 4.67E-13    | 2.03E-11    | 19.0783879   | -2.910878152 |
| CAMK4         | -1.542492119 | 3.330485665  | -5.400715798 | 8.22E-08    | 6.73E-07    | 7.41442744   | -2.912972576 |
| SPIN3         | -1.543251441 | -1.086635239 | -4.937488821 | 9.21E-07    | 5.53E-06    | 5.106332349  | -2.91450614  |
| RP11-519G16.3 | -1.543448971 | -0.478002542 | -4.466369261 | 8.82E-06    | 3.95E-05    | 2.961706275  | -2.914905213 |
| CTA-85E5.10   | -1.543889936 | -4.145762252 | -4.449306567 | 9.54E-06    | 4.22E-05    | 2.887905162  | -2.915796302 |
| UCA1          | -1.544984112 | -3.344279359 | -5.09550022  | 4.13E-07    | 2.75E-06    | 5.871562472  | -2.918008553 |
| COL6A6        | -1.544986185 | -1.735085143 | -3.291987791 | 0.001028213 | 0.00257654  | -1.477452002 | -2.918012747 |
| MBL1P         | -1.545098613 | -3.820663621 | -4.603522596 | 4.67E-06    | 2.27E-05    | 3.56479438   | -2.918240152 |
| PRELID1P3     | -1.545100692 | -4.050611851 | -4.834794908 | 1.53E-06    | 8.64E-06    | 4.621325955  | -2.918244359 |
| PPIAP16       | -1.545120449 | -1.946486188 | -5.451925439 | 6.22E-08    | 5.30E-07    | 7.681607195  | -2.918284322 |
| MYO6          | -1.545588059 | 0.176693815  | -3.866694684 | 0.000117152 | 0.00038084  | 0.531819782  | -2.919230358 |
| C3orf70       | -1.546554459 | -2.678867012 | -4.178915612 | 3.17E-05    | 0.00012117  | 1.754750264  | -2.921186481 |
| DKK3          | -1.546879497 | -3.179417855 | -5.666469097 | 1.89E-08    | 1.88E-07    | 8.826781067  | -2.921844697 |
| IGF2          | -1.548277846 | -0.047209554 | -4.210300428 | 2.77E-05    | 0.000107685 | 1.882760768  | -2.924678101 |
| SFRP2         | -1.548736342 | -3.285301309 | -4.612053205 | 4.48E-06    | 2.19E-05    | 3.602883528  | -2.925607727 |
| ELL2          | -1.551496551 | 5.467515458  | -6.563099127 | 8.29E-11    | 1.70E-09    | 14.05814913  | -2.931210449 |
| NAP1L3        | -1.552386337 | -2.563571175 | -4.551475825 | 5.95E-06    | 2.80E-05    | 3.33387222   | -2.933018838 |
| STK24         | -1.553084477 | 6.539363672  | -12.3296958  | 1.05E-32    | 1.60E-29    | 63.30418657  | -2.934438508 |
| HIF3A         | -1.55402111  | -3.953207579 | -3.498016091 | 0.000488511 | 0.001335603 | -0.793348969 | -2.936344238 |
| C12orf42      | -1.554949682 | -0.585920538 | -5.80433631  | 8.57E-09    | 9.49E-08    | 9.584584647  | -2.938234785 |
| RP11-46D6.1   | -1.55561066  | 0.601751419  | -8.998617174 | 1.06E-18    | 2.03E-16    | 31.73643257  | -2.939581261 |
| HR            | -1.555754424 | -1.484690037 | -5.136468679 | 3.34E-07    | 2.29E-06    | 6.073710483  | -2.939874204 |
| ZNF135        | -1.556084088 | 0.124034982  | -4.570835038 | 5.44E-06    | 2.59E-05    | 3.419471105  | -2.940546058 |
| TREM2         | -1.556238568 | -2.729850101 | -4.886771314 | 1.19E-06    | 6.91E-06    | 4.865585697  | -2.940860941 |
| MEIS3         | -1.557220259 | -3.313324697 | -5.435699052 | 6.80E-08    | 5.72E-07    | 7.596690408  | -2.94286275  |
| ART4          | -1.557954156 | -0.616148931 | -3.826189706 | 0.00013788  | 0.000439034 | 0.379917296  | -2.94436016  |
| SLC22A23      | -1.558260154 | 2.72206468   | -4.763878973 | 2.17E-06    | 1.16E-05    | 4.292088574  | -2.944984731 |
| PARK2         | -1.559102351 | -1.712171278 | -4.648225161 | 3.78E-06    | 1.89E-05    | 3.765142739  | -2.946704416 |
| DUOXA1        | -1.559980013 | -2.127444838 | -5.83487083  | 7.18E-09    | 8.11E-08    | 9.754730091  | -2.948497587 |
| TRBC2         | -1.560425287 | 3.587762229  | -6.896748277 | 9.21E-12    | 2.66E-10    | 16.18522136  | -2.949407752 |
| SLC4A4        | -1.561236594 | -0.611595186 | -4.526751723 | 6.68E-06    | 3.09E-05    | 3.225059403  | -2.951066834 |
| PCED1B-AS1    | -1.564400285 | 2.241906354  | -7.302236136 | 5.61E-13    | 2.37E-11    | 18.89928869  | -2.957545339 |
| SIX5          | -1.564632028 | -0.39833904  | -6.053941861 | 1.97E-09    | 2.61E-08    | 10.99989027  | -2.958020454 |
| S1PR5         | -1.564717538 | 0.00250762   | -5.606860952 | 2.64E-08    | 2.51E-07    | 8.504436393  | -2.958195784 |
| SGCB          | -1.565184325 | -1.117917526 | -5.052056376 | 5.16E-07    | 3.35E-06    | 5.658882136  | -2.959153069 |
| RP3-412A9.11  | -1.566079502 | -0.932856194 | -6.809723394 | 1.65E-11    | 4.30E-10    | 15.62112359  | -2.960989762 |
| RP3-403L10.2  | -1.566383968 | -0.584114131 | -6.14887096  | 1.11E-09    | 1.60E-08    | 11.55272324  | -2.961614715 |

| gene           | logFC        | AveExpr      | t            | P.Value     | adj.P.Val   | B            | FoldChange   |
|----------------|--------------|--------------|--------------|-------------|-------------|--------------|--------------|
| FOXO6          | -1.566655275 | -1.320792594 | -6.515270516 | 1.13E-10    | 2.22E-09    | 13.76116833  | -2.962171715 |
| LEF1           | -1.567295026 | 3.96919435   | -5.867548178 | 5.94E-09    | 6.83E-08    | 9.93774125   | -2.963485556 |
| CCL28          | -1.568094665 | 2.465821806  | -6.070275866 | 1.79E-09    | 2.40E-08    | 11.09444356  | -2.965128576 |
| RP11-616M22.3  | -1.569410269 | -4.06132796  | -5.097916591 | 4.08E-07    | 2.72E-06    | 5.883442713  | -2.96783373  |
| CDR2L          | -1.569915858 | -1.614410905 | -5.476806497 | 5.43E-08    | 4.72E-07    | 7.812280007  | -2.968873983 |
| TMEM56         | -1.571079023 | 2.436941308  | -4.056616779 | 5.35E-05    | 0.000191232 | 1.264765903  | -2.971268587 |
| AC034228.7     | -1.574898817 | -3.286836135 | -5.594276498 | 2.83E-08    | 2.67E-07    | 8.436792971  | -2.979145978 |
| C3orf14        | -1.574973187 | -3.639550671 | -4.452351241 | 9.41E-06    | 4.18E-05    | 2.901054341  | -2.979299554 |
| FAM115D        | -1.575122767 | -2.748264562 | -6.171393684 | 9.68E-10    | 1.42E-08    | 11.68506083  | -2.979608467 |
| FBLN7          | -1.575200251 | -0.883411117 | -5.862829653 | 6.10E-09    | 7.01E-08    | 9.911255847  | -2.9797685   |
| ACTN2          | -1.575478551 | -3.527547387 | -4.725887315 | 2.61E-06    | 1.36E-05    | 4.117621804  | -2.980343361 |
| RP5-1187M17.10 | -1.575662489 | 2.888070384  | -6.280258116 | 4.95E-10    | 8.01E-09    | 12.33104675  | -2.980723367 |
| GPR3           | -1.576908594 | -0.012312873 | -6.152211923 | 1.09E-09    | 1.57E-08    | 11.57232547  | -2.983299033 |
| AL137003.1     | -1.577028637 | 4.200830086  | -6.304392051 | 4.27E-10    | 7.12E-09    | 12.47567129  | -2.983547275 |
| CXCR5          | -1.579395072 | 1.90838314   | -6.270514604 | 5.26E-10    | 8.42E-09    | 12.27280354  | -2.988445168 |
| AC116366.6     | -1.580359392 | 5.787099195  | -6.283514252 | 4.86E-10    | 7.90E-09    | 12.35052943  | -2.990443359 |
| RPS26P21       | -1.581965077 | -0.754362427 | -6.565011503 | 8.19E-11    | 1.69E-09    | 14.07006513  | -2.993773504 |
| DUSP5          | -1.582407339 | 4.738189779  | -7.202201945 | 1.13E-12    | 4.24E-11    | 18.21668574  | -2.994691393 |
| RAB36          | -1.583119375 | -1.531701986 | -5.818684588 | 7.89E-09    | 8.83E-08    | 9.664432484  | -2.996169775 |
| SEC14L4        | -1.583135496 | -0.221303775 | -3.880404217 | 0.00011083  | 0.0003631   | 0.583585492  | -2.996203255 |
| CCDC141        | -1.583220202 | 2.35190977   | -6.323044111 | 3.80E-10    | 6.43E-09    | 12.58779697  | -2.996379178 |
| PARD6G         | -1.583326295 | -2.114782112 | -5.303684154 | 1.39E-07    | 1.06E-06    | 6.914716025  | -2.996599534 |
| MYL4           | -1.58346258  | 1.32837531   | -3.750087019 | 0.000186501 | 0.000572416 | 0.098722153  | -2.996882623 |
| RP11-403I13.9  | -1.583478012 | -3.503435246 | -4.664839402 | 3.49E-06    | 1.76E-05    | 3.840077835  | -2.99691468  |
| SRL            | -1.587039894 | -2.868913794 | -5.662358137 | 1.93E-08    | 1.92E-07    | 8.804447254  | -3.004322929 |
| FAT4           | -1.587346688 | -1.239755197 | -4.230447292 | 2.54E-05    | 9.97E-05    | 1.965422243  | -3.004961877 |
| TMEM246        | -1.587614596 | -2.724803017 | -4.256640123 | 2.26E-05    | 9.02E-05    | 2.073459747  | -3.00551995  |
| AXIN2          | -1.587896978 | 0.39707185   | -5.682384043 | 1.72E-08    | 1.75E-07    | 8.913386538  | -3.006108284 |
| TGFB2          | -1.590654476 | -2.159907547 | -6.512230013 | 1.15E-10    | 2.26E-09    | 13.74235662  | -3.01185951  |
| AHNAK2         | -1.592484907 | -1.123722664 | -5.207204695 | 2.31E-07    | 1.65E-06    | 6.426356778  | -3.015683256 |
| ETV1           | -1.592599736 | -3.382724162 | -4.560068249 | 5.72E-06    | 2.71E-05    | 3.371821501  | -3.015923294 |
| CTC-277H1.7    | -1.59266384  | -1.022074176 | -6.095205682 | 1.54E-09    | 2.11E-08    | 11.23921285  | -3.016057305 |
| CHAC1          | -1.593817078 | -0.123477972 | -5.145147824 | 3.19E-07    | 2.20E-06    | 6.116732858  | -3.018469195 |
| PRKCDBP        | -1.594528943 | -2.796216537 | -4.059221537 | 5.29E-05    | 0.000189457 | 1.275054915  | -3.019958958 |
| VGF            | -1.594665797 | -3.402274276 | -4.821791354 | 1.63E-06    | 9.13E-06    | 4.56060687   | -3.020245444 |
| SLC9C1         | -1.595319124 | -2.522726961 | -4.959461792 | 8.25E-07    | 5.02E-06    | 5.211370043  | -3.021613477 |
| BEND7          | -1.595991406 | -3.067304619 | -4.628924045 | 4.14E-06    | 2.04E-05    | 3.678411001  | -3.023021849 |
| CXCL9          | -1.596763301 | -3.262178433 | -4.773062879 | 2.07E-06    | 1.12E-05    | 4.334463894  | -3.024639709 |
| CD320          | -1.597930226 | 2.406426913  | -11.76017585 | 4.53E-30    | 5.25E-27    | 57.35910796  | -3.027087181 |
| GLI3           | -1.599139773 | -2.684126871 | -5.053652465 | 5.12E-07    | 3.33E-06    | 5.66666517   | -3.029626137 |
| TMEM158        | -1.599452892 | -0.579122965 | -5.468535498 | 5.68E-08    | 4.91E-07    | 7.768779261  | -3.030283753 |
| HIST2H3PS2     | -1.599610291 | -1.617953203 | -4.389397601 | 1.25E-05    | 5.36E-05    | 2.630935078  | -3.030614377 |
| EPB41L4A       | -1.600446525 | -0.57769947  | -5.56529532  | 3.33E-08    | 3.09E-07    | 8.281558651  | -3.03237153  |
| RP5-983L19.2   | -1.601103638 | -2.302690666 | -5.442094991 | 6.56E-08    | 5.54E-07    | 7.630133441  | -3.033753016 |
| RP11-242O24.3  | -1.601620875 | -1.759121595 | -8.959709812 | 1.47E-18    | 2.66E-16    | 31.41602827  | -3.034840877 |
| MAPK10         | -1.602176851 | -2.465562545 | -5.662779709 | 1.93E-08    | 1.91E-07    | 8.806736848  | -3.036010648 |
| C3orf20        | -1.603881695 | 0.532112161  | -7.186435821 | 1.27E-12    | 4.64E-11    | 18.10987856  | -3.039600447 |
| PHLDB1         | -1.604770392 | 2.064644843  | -5.960039588 | 3.45E-09    | 4.28E-08    | 10.46092152  | -3.041473411 |
| SYNM           | -1.605354843 | -0.008693714 | -5.847051958 | 6.69E-09    | 7.61E-08    | 9.822839325  | -3.042705794 |
| AC004696.2     | -1.606041412 | -0.343221751 | -4.599729386 | 4.75E-06    | 2.30E-05    | 3.547879437  | -3.044154143 |
| RP11-96K19.2   | -1.607010948 | 1.642211637  | -6.068403026 | 1.81E-09    | 2.42E-08    | 11.08359014  | -3.046200596 |
| ST7-AS1        | -1.607404347 | -0.350469344 | -4.851792934 | 1.41E-06    | 8.01E-06    | 4.700932534  | -3.047031357 |
| RP11-390E23.3  | -1.607555338 | -3.022418017 | -5.066206093 | 4.80E-07    | 3.14E-06    | 5.727962176  | -3.047350272 |
| GALNTL6        | -1.608424225 | -3.096679578 | -4.263811353 | 2.19E-05    | 8.77E-05    | 2.103151165  | -3.049186143 |
| DNAH2          | -1.608527931 | -1.964652483 | -3.66960484  | 0.000255227 | 0.000754762 | -0.192672656 | -3.049405337 |
| AC007362.1     | -1.608722326 | -3.323338337 | -5.443852649 | 6.50E-08    | 5.50E-07    | 7.639330372  | -3.049816254 |
| HFM1           | -1.609026133 | -3.436483171 | -4.351595304 | 1.48E-05    | 6.22E-05    | 2.470514846  | -3.050458562 |
| STAC           | -1.613300729 | -2.914506089 | -3.781142959 | 0.000164978 | 0.000514291 | 0.21280855   | -3.059510243 |
| RP11-158I9.5   | -1.613320275 | -2.617334335 | -5.933712691 | 4.03E-09    | 4.90E-08    | 10.31122456  | -3.059551695 |
| RP11-732M18.3  | -1.613697469 | 1.248567296  | -8.811948427 | 5.06E-18    | 7.98E-16    | 30.21004447  | -3.060351721 |
| RP11-258A12.3  | -1.613921176 | 2.181744981  | -7.75158373  | 2.15E-14    | 1.45E-12    | 22.06960359  | -3.060826302 |

| gene          | logFC        | AveExpr      | t            | P.Value     | adj.P.Val   | B            | FoldChange   |
|---------------|--------------|--------------|--------------|-------------|-------------|--------------|--------------|
| PBX4          | -1.615012767 | 2.292083899  | -6.177153576 | 9.34E-10    | 1.38E-08    | 11.71897658  | -3.063143101 |
| GYPB          | -1.616183313 | 0.88536042   | -3.893356974 | 0.000105154 | 0.000346866 | 0.632657161  | -3.065629423 |
| HSPA2         | -1.617013297 | 1.801335435  | -4.930997604 | 9.51E-07    | 5.69E-06    | 5.075387407  | -3.067393591 |
| PCDHB9        | -1.618534189 | -3.690541536 | -4.803310506 | 1.79E-06    | 9.85E-06    | 4.474580945  | -3.070628949 |
| DAAM2         | -1.619151494 | -1.376940964 | -4.111348404 | 4.24E-05    | 0.00015635  | 1.482304673  | -3.071943101 |
| AC007041.2    | -1.620863288 | 0.269251849  | -6.432094576 | 1.91E-10    | 3.54E-09    | 13.24947327  | -3.0755902   |
| KLRB1         | -1.620985142 | 0.49898897   | -6.25156733  | 5.92E-10    | 9.30E-09    | 12.15978345  | -3.075849985 |
| CRISP2        | -1.622008878 | -3.48820394  | -4.609655734 | 4.53E-06    | 2.21E-05    | 3.592171991  | -3.078033382 |
| PTPRM         | -1.622684762 | 1.407255688  | -4.436119097 | 1.01E-05    | 4.46E-05    | 2.831051755  | -3.079475739 |
| EPB41L1       | -1.627219391 | -1.514025502 | -6.603024387 | 6.41E-11    | 1.36E-09    | 14.30758532  | -3.089170269 |
| RP11-90D4.2   | -1.627277704 | -0.731566393 | -5.477852192 | 5.40E-08    | 4.69E-07    | 7.817784183  | -3.089295133 |
| LRP2BP        | -1.627886281 | 0.596866206  | -7.832000598 | 1.18E-14    | 8.63E-13    | 22.65477767  | -3.090598576 |
| SLC24A3       | -1.628900918 | 2.078550776  | -3.741761317 | 0.000192705 | 0.000588893 | 0.068292657  | -3.092772936 |
| CLDN10        | -1.630407888 | -3.096448035 | -4.000960028 | 6.75E-05    | 0.000235117 | 1.046446334  | -3.096005186 |
| ANKH          | -1.631161175 | 3.372595986  | -6.648941747 | 4.75E-11    | 1.04E-09    | 14.59617539  | -3.097622152 |
| RP11-179H18.4 | -1.631416266 | -0.995077003 | -5.775574978 | 1.01E-08    | 1.10E-07    | 9.425084636  | -3.098169908 |
| MGP           | -1.632172895 | -1.162618771 | -6.18678814  | 8.81E-10    | 1.31E-08    | 11.77577309  | -3.099795186 |
| ZNF300        | -1.632659979 | -1.019268599 | -5.019206523 | 6.10E-07    | 3.87E-06    | 5.499215631  | -3.100841919 |
| GNG4          | -1.633001371 | -2.222125662 | -5.602492637 | 2.70E-08    | 2.57E-07    | 8.480939806  | -3.101575773 |
| SEZ6L         | -1.636859252 | -0.661934429 | -3.712328501 | 0.000216232 | 0.000652252 | -0.038753231 | -3.109880731 |
| CYYR1         | -1.63809912  | -2.857398596 | -3.887571387 | 0.000107654 | 0.000353577 | 0.610718774  | -3.112554546 |
| RP11-461F16.4 | -1.63813415  | -1.435245294 | -6.115672349 | 1.36E-09    | 1.89E-08    | 11.35847687  | -3.112630123 |
| PTCH1         | -1.638749159 | 0.698473022  | -5.265470368 | 1.70E-07    | 1.27E-06    | 6.720269565  | -3.113957295 |
| PRDX3P1       | -1.639736395 | -1.901317048 | -6.141534696 | 1.16E-09    | 1.66E-08    | 11.50971435  | -3.116088904 |
| RP13-25N22.1  | -1.639807327 | -1.339674083 | -6.733421778 | 2.73E-11    | 6.59E-10    | 15.13192171  | -3.116242114 |
| CSF3          | -1.639879288 | -3.089852946 | -4.93516269  | 9.32E-07    | 5.59E-06    | 5.09523875   | -3.116397556 |
| FEZ1          | -1.641208033 | -1.034614001 | -4.550768479 | 5.97E-06    | 2.81E-05    | 3.330751218  | -3.119269128 |
| NRCAM         | -1.641370991 | -0.316753455 | -5.465986926 | 5.76E-08    | 4.98E-07    | 7.755387722  | -3.119621483 |
| CASK          | -1.644619937 | 3.154104709  | -9.013782047 | 9.31E-19    | 1.84E-16    | 31.86163728  | -3.126654778 |
| RP11-688G15.3 | -1.644672913 | 1.051990505  | -7.900521965 | 7.02E-15    | 5.41E-13    | 23.15761836  | -3.126769593 |
| VWDE          | -1.648412509 | -1.91397916  | -3.974177423 | 7.55E-05    | 0.000259326 | 0.942430646  | -3.134884976 |
| FOXO1         | -1.648535368 | 5.481340095  | -8.143988563 | 1.09E-15    | 1.02E-13    | 24.97556327  | -3.135151953 |
| EDNRB         | -1.649136473 | -2.699967773 | -4.930982258 | 9.52E-07    | 5.69E-06    | 5.075314294  | -3.136458499 |
| RELN          | -1.650373059 | -2.380906758 | -4.057093426 | 5.34E-05    | 0.000190952 | 1.266648221  | -3.139148022 |
| JAM3          | -1.650944871 | 0.748485932  | -5.933348427 | 4.04E-09    | 4.90E-08    | 10.30915766  | -3.14039247  |
| AC073109.2    | -1.651063035 | -3.846218088 | -4.256186697 | 2.27E-05    | 9.04E-05    | 2.071584026  | -3.140649694 |
| ELL2P1        | -1.651385305 | -0.890652675 | -6.899082646 | 9.07E-12    | 2.63E-10    | 16.2004428   | -3.141351332 |
| WIPF3         | -1.652500192 | -2.928726065 | -3.85812227  | 0.000121277 | 0.000392696 | 0.499541711  | -3.143779846 |
| NCS1          | -1.65261359  | 1.14283342   | -5.033447999 | 5.67E-07    | 3.64E-06    | 5.568314487  | -3.144026962 |
| MAB21L3       | -1.653102035 | -2.091768947 | -4.221504133 | 2.64E-05    | 0.000103199 | 1.928681905  | -3.145091598 |
| HDX           | -1.653831906 | -0.817456583 | -4.175809725 | 3.22E-05    | 0.000122571 | 1.742132497  | -3.146683128 |
| FUT1          | -1.654608582 | 0.119089022  | -4.780873702 | 2.00E-06    | 1.08E-05    | 4.370565136  | -3.148377602 |
| KIF26A        | -1.654984269 | 1.686477563  | -4.784994104 | 1.96E-06    | 1.06E-05    | 4.389632181  | -3.149197567 |
| DMGDH         | -1.655554837 | -1.666522626 | -6.656351195 | 4.53E-11    | 1.00E-09    | 14.64291567  | -3.150443283 |
| AC118278.1    | -1.656591787 | -0.612513163 | -6.202588658 | 8.00E-10    | 1.21E-08    | 11.86909622  | -3.152708505 |
| GRAMD2        | -1.657031218 | -3.533542934 | -5.72307005  | 1.37E-08    | 1.43E-07    | 9.135827088  | -3.153668937 |
| RP5-982E9.1   | -1.657597271 | -2.153683111 | -6.721054781 | 2.96E-11    | 7.03E-10    | 15.0531068   | -3.154906546 |
| TTN           | -1.658278066 | 6.15153821   | -6.571075167 | 7.88E-11    | 1.63E-09    | 14.1078689   | -3.156395671 |
| ULBP2         | -1.659404931 | -2.644214889 | -5.829534939 | 7.41E-09    | 8.35E-08    | 9.724937002  | -3.158862042 |
| MIR22HG       | -1.659458514 | 5.411108012  | -7.22142057  | 9.91E-13    | 3.82E-11    | 18.34716791  | -3.158979366 |
| C3            | -1.659797196 | 0.795182717  | -5.737028372 | 1.26E-08    | 1.33E-07    | 9.212483811  | -3.159721044 |
| CD247         | -1.661957716 | 3.305458463  | -6.859909223 | 1.18E-11    | 3.26E-10    | 15.94563166  | -3.164456457 |
| RP11-700H6.1  | -1.662329276 | -1.792823463 | -6.117043216 | 1.35E-09    | 1.88E-08    | 11.36647851  | -3.165271554 |
| FRAS1         | -1.662557672 | -2.537187755 | -3.723792918 | 0.000206764 | 0.000627094 | 0.002844527  | -3.165772693 |
| RP11-594N15.3 | -1.662877824 | -2.630286735 | -5.599905477 | 2.74E-08    | 2.60E-07    | 8.467031941  | -3.166475296 |
| RP11-473M14.2 | -1.664735047 | -2.208153168 | -6.590467359 | 6.95E-11    | 1.45E-09    | 14.22898443  | -3.170554216 |
| RP11-439L18.1 | -1.665919856 | -1.654980114 | -6.793819284 | 1.83E-11    | 4.68E-10    | 15.51873982  | -3.173159093 |
| PPP1R16B      | -1.666674849 | 5.87938276   | -5.890815427 | 5.18E-09    | 6.07E-08    | 10.06863326  | -3.174820109 |
| TSPO2         | -1.667815773 | -0.385771694 | -3.982330154 | 7.30E-05    | 0.00025168  | 0.974021719  | -3.17733184  |
| RP11-426L16.9 | -1.670068133 | -3.268572592 | -5.626448274 | 2.36E-08    | 2.30E-07    | 8.610005766  | -3.18229622  |
| BAG3          | -1.670376133 | 2.489507918  | -5.624434212 | 2.39E-08    | 2.32E-07    | 8.599134646  | -3.182975677 |

| gene           | logFC        | AveExpr      | t            | P.Value     | adj.P.Val   | B            | FoldChange   |
|----------------|--------------|--------------|--------------|-------------|-------------|--------------|--------------|
| CES4A          | -1.670984779 | 0.650566112  | -5.290637897 | 1.49E-07    | 1.13E-06    | 6.848181929  | -3.184318799 |
| RP11-13L2.4    | -1.671375936 | -1.080331465 | -2.80783803  | 0.00508061  | 0.010539501 | -2.924658869 | -3.185182279 |
| CTHRC1         | -1.671392425 | -3.449188773 | -4.763320971 | 2.17E-06    | 1.16E-05    | 4.289516421  | -3.185218683 |
| SLC30A4        | -1.67148361  | 0.116607736  | -6.486324643 | 1.36E-10    | 2.61E-09    | 13.5824071   | -3.185420011 |
| RP5-826L7.1    | -1.67338376  | -1.668469489 | -6.207783266 | 7.75E-10    | 1.17E-08    | 11.89982555  | -3.189618239 |
| AGT            | -1.673690169 | -2.877755321 | -3.773973422 | 0.000169728 | 0.000527003 | 0.18638944   | -3.190295742 |
| FAM71A         | -1.674159589 | 0.111440074  | -6.100242952 | 1.49E-09    | 2.05E-08    | 11.2685317   | -3.19133396  |
| SKIL           | -1.675380246 | 6.037399591  | -8.381900128 | 1.67E-16    | 1.96E-14    | 26.79878876  | -3.194035276 |
| PDLIM4         | -1.676078322 | -3.45673958  | -5.23422119  | 2.00E-07    | 1.46E-06    | 6.562252041  | -3.195581144 |
| APBA2          | -1.676963838 | 3.296564994  | -6.215602287 | 7.38E-10    | 1.13E-08    | 11.94612492  | -3.197543173 |
| SHISA2         | -1.677223083 | -2.70209268  | -5.185598497 | 2.59E-07    | 1.83E-06    | 6.318155917  | -3.198117807 |
| PTPRU          | -1.677497534 | -0.529663253 | -6.016652533 | 2.46E-09    | 3.17E-08    | 10.78492144  | -3.198726258 |
| ROR1           | -1.677525819 | -2.923962145 | -4.910573526 | 1.05E-06    | 6.24E-06    | 4.978275044  | -3.198788972 |
| EMILIN1        | -1.678806373 | 2.049413212  | -4.354835838 | 1.46E-05    | 6.14E-05    | 2.484214184  | -3.201629516 |
| RP11-422P24.9  | -1.678910694 | -0.669790015 | -7.109242977 | 2.16E-12    | 7.36E-11    | 17.58999614  | -3.201861034 |
| AASS           | -1.679216084 | -1.165190028 | -4.956689865 | 8.36E-07    | 5.08E-06    | 5.19809485   | -3.202538877 |
| ARHGAP44       | -1.680061799 | -2.391503618 | -3.932885301 | 8.95E-05    | 0.00030127  | 0.783392088  | -3.204416772 |
| FAM221A        | -1.680532989 | 1.885160725  | -6.902570766 | 8.86E-12    | 2.58E-10    | 16.22319609  | -3.205463517 |
| GSTM3          | -1.681652957 | 1.097668156  | -5.536921512 | 3.90E-08    | 3.54E-07    | 8.130313218  | -3.207952893 |
| OSBP2          | -1.681665203 | 3.634118726  | -4.70730347  | 2.85E-06    | 1.47E-05    | 4.032767525  | -3.207980123 |
| MAGI3          | -1.682494909 | 0.962947022  | -5.713088972 | 1.45E-08    | 1.50E-07    | 9.081120152  | -3.20982559  |
| RP11-65J3.14   | -1.686233522 | -1.650275081 | -6.752757806 | 2.41E-11    | 5.88E-10    | 15.25541608  | -3.21815435  |
| TGM5           | -1.686233702 | -0.309644153 | -4.461067907 | 9.04E-06    | 4.03E-05    | 2.938747277  | -3.218154749 |
| RNF150         | -1.686712767 | -2.404092448 | -4.213001632 | 2.74E-05    | 0.000106573 | 1.893821531  | -3.219223555 |
| GJB6           | -1.690852434 | -1.69070519  | -4.253749757 | 2.29E-05    | 9.12E-05    | 2.061506256  | -3.228474056 |
| TUFT1          | -1.691684876 | 1.549063378  | -6.068470868 | 1.81E-09    | 2.42E-08    | 11.08398325  | -3.23033744  |
| ATP1B2         | -1.691971492 | -0.108902023 | -4.682825477 | 3.20E-06    | 1.63E-05    | 3.921489192  | -3.230979264 |
| SSTR2          | -1.692537085 | -3.094273501 | -4.692621221 | 3.06E-06    | 1.57E-05    | 3.965954481  | -3.232246183 |
| HS3ST4         | -1.69275919  | -3.20259309  | -3.447779804 | 0.000587794 | 0.001568775 | -0.963896396 | -3.232743831 |
| MB21D2         | -1.693661916 | -1.703020612 | -5.475301478 | 5.47E-08    | 4.75E-07    | 7.804359848  | -3.234767263 |
| CTD-2105E13.13 | -1.694160567 | 0.856423429  | -7.58939062  | 7.11E-14    | 4.02E-12    | 20.90573859  | -3.235885516 |
| C9orf173       | -1.695123362 | -2.211700766 | -4.536192009 | 6.39E-06    | 2.98E-05    | 3.266539676  | -3.238045734 |
| SYT5           | -1.695162502 | -2.675446683 | -5.516721214 | 4.36E-08    | 3.90E-07    | 8.023080223  | -3.238133582 |
| EPHX2          | -1.695340661 | 0.241970802  | -6.059855024 | 1.90E-09    | 2.53E-08    | 11.03409264  | -3.238533485 |
| GYPE           | -1.695599458 | 0.566541066  | -4.604011884 | 4.66E-06    | 2.26E-05    | 3.56697722   | -3.239114479 |
| UCN2           | -1.695773274 | -1.86849283  | -5.784746415 | 9.60E-09    | 1.05E-07    | 9.475865508  | -3.239504751 |
| AD000864.1     | -1.697795859 | -1.622552756 | -4.852312424 | 1.41E-06    | 8.00E-06    | 4.703369656  | -3.244049557 |
| SLC2A12        | -1.698060884 | -3.910774475 | -5.405736779 | 8.00E-08    | 6.57E-07    | 7.440518457  | -3.244645549 |
| CA1            | -1.698093743 | 4.776928287  | -3.878661353 | 0.000111615 | 0.000364886 | 0.576994756  | -3.24471945  |
| RP1-153P14.8   | -1.698426188 | -0.784085606 | -5.354734111 | 1.05E-07    | 8.33E-07    | 7.176554343  | -3.245467228 |
| SEC14L2        | -1.698543454 | 1.127181444  | -6.710956736 | 3.17E-11    | 7.42E-10    | 14.98885036  | -3.245731038 |
| RPL3L          | -1.699506482 | -3.109384364 | -6.011410721 | 2.54E-09    | 3.26E-08    | 10.7548022   | -3.247898352 |
| KCNJ12         | -1.701619442 | -1.654037278 | -4.877025364 | 1.24E-06    | 7.19E-06    | 4.819595237  | -3.252658684 |
| PURG           | -1.702206982 | -3.461572661 | -4.991399842 | 7.02E-07    | 4.35E-06    | 5.364836614  | -3.253983605 |
| ZNF503-AS1     | -1.702324533 | -3.103444698 | -6.031991635 | 2.25E-09    | 2.93E-08    | 10.87319984  | -3.254248751 |
| FGF13          | -1.703100868 | -2.889780878 | -4.547687038 | 6.06E-06    | 2.84E-05    | 3.317160514  | -3.25600038  |
| PKIA           | -1.703382485 | -0.316468271 | -5.669984497 | 1.85E-08    | 1.85E-07    | 8.84589143   | -3.256636019 |
| SYN1           | -1.704689831 | -1.453284479 | -6.100509159 | 1.49E-09    | 2.05E-08    | 11.27008175  | -3.259588467 |
| SLC2A4         | -1.705475726 | 0.521292081  | -4.758825761 | 2.22E-06    | 1.18E-05    | 4.26880593   | -3.26136458  |
| MAGEE1         | -1.705902711 | -0.387162828 | -6.828515237 | 1.45E-11    | 3.89E-10    | 15.74237923  | -3.262329969 |
| KCTD15         | -1.706602409 | 3.641744785  | -6.662459318 | 4.35E-11    | 9.71E-10    | 14.68148285  | -3.263912563 |
| PTGDR2         | -1.706708599 | 0.751627092  | -5.615766513 | 2.51E-08    | 2.41E-07    | 8.552391577  | -3.264152811 |
| EPHA2          | -1.707922916 | -1.79512951  | -5.113790601 | 3.76E-07    | 2.53E-06    | 5.961621401  | -3.266901408 |
| STK31          | -1.708938825 | -1.677956566 | -6.539930861 | 9.62E-11    | 1.94E-09    | 13.91404148  | -3.269202685 |
| TRIM36         | -1.710016981 | -0.732155408 | -6.397284993 | 2.38E-10    | 4.28E-09    | 13.03712652  | -3.271646742 |
| FAM186B        | -1.711232385 | -0.281860519 | -6.174730701 | 9.48E-10    | 1.39E-08    | 11.70470648  | -3.274404114 |
| PAWR           | -1.71243092  | 0.459534486  | -5.554515174 | 3.53E-08    | 3.25E-07    | 8.224009756  | -3.277125493 |
| AC010170.1     | -1.713304274 | -1.725405453 | -5.950039653 | 3.66E-09    | 4.50E-08    | 10.40398818  | -3.279109943 |
| PERP           | -1.71345951  | -2.508690259 | -6.789001492 | 1.89E-11    | 4.81E-10    | 15.48776814  | -3.279462801 |
| ADAM32         | -1.714210171 | 0.199378834  | -6.002508694 | 2.68E-09    | 3.42E-08    | 10.70370758  | -3.281169608 |
| SLAMF1         | -1.714218221 | 1.810563679  | -7.012832652 | 4.19E-12    | 1.34E-10    | 16.94783887  | -3.281187917 |

| gene             | logFC        | AveExpr      | t            | P.Value     | adj.P.Val   | B           | FoldChange   |
|------------------|--------------|--------------|--------------|-------------|-------------|-------------|--------------|
| RAB30            | -1.71490758  | 3.323056112  | -7.479046468 | 1.59E-13    | 8.04E-12    | 20.12651081 | -3.282756133 |
| LAMB4            | -1.717161822 | -3.484911866 | -5.45936697  | 5.97E-08    | 5.12E-07    | 7.720630514 | -3.287889518 |
| CCDC64           | -1.718015517 | 1.788700013  | -6.712885264 | 3.13E-11    | 7.35E-10    | 15.00111524 | -3.289835659 |
| C19orf69         | -1.720040047 | -1.625120214 | -7.108275683 | 2.18E-12    | 7.39E-11    | 17.58351383 | -3.294455517 |
| ZC3H12B          | -1.720055049 | -1.335294593 | -5.421194042 | 7.36E-08    | 6.12E-07    | 7.520984332 | -3.294489774 |
| NELL2            | -1.722428164 | 2.509592069  | -6.224233378 | 7.00E-10    | 1.08E-08    | 11.99729564 | -3.2999134   |
| CTC-455F18.3     | -1.723334892 | -2.481796063 | -5.268649503 | 1.67E-07    | 1.25E-06    | 6.736395431 | -3.301988033 |
| C1orf115         | -1.723837106 | -1.826403839 | -5.446680994 | 6.40E-08    | 5.42E-07    | 7.654135552 | -3.303137683 |
| RBM11            | -1.724366506 | -2.218533024 | -6.591206052 | 6.92E-11    | 1.45E-09    | 14.23360448 | -3.304349999 |
| IRF4             | -1.724617134 | 3.162427186  | -6.292653479 | 4.59E-10    | 7.55E-09    | 12.4052628  | -3.304924086 |
| BACE2            | -1.72504873  | 1.456731276  | -5.928402455 | 4.15E-09    | 5.02E-08    | 10.2811051  | -3.305912935 |
| DNAH8            | -1.725924914 | -1.265671269 | -4.163498955 | 3.39E-05    | 0.000128588 | 1.692208821 | -3.307921306 |
| GNG2             | -1.726054308 | 5.502377402  | -8.58191127  | 3.35E-17    | 4.61E-15    | 28.3669452  | -3.308218005 |
| TNN              | -1.726241714 | -1.685999181 | -4.674577485 | 3.33E-06    | 1.69E-05    | 3.884118579 | -3.308647769 |
| FZD4             | -1.727304476 | -1.004276695 | -5.388328577 | 8.79E-08    | 7.12E-07    | 7.350156502 | -3.311085984 |
| LEFTY2           | -1.728994535 | -3.548181492 | -5.782799543 | 9.70E-09    | 1.06E-07    | 9.465079661 | -3.31496706  |
| RP1-151F17.1     | -1.729822091 | 0.465861305  | -7.161909048 | 1.50E-12    | 5.38E-11    | 17.94414351 | -3.316869132 |
| NGFRAP1          | -1.731161962 | 0.746092751  | -4.306518594 | 1.81E-05    | 7.44E-05    | 2.280973058 | -3.319951031 |
| C1orf21          | -1.731923973 | 2.208733999  | -5.254169911 | 1.80E-07    | 1.34E-06    | 6.663023712 | -3.321705044 |
| KCNN1            | -1.732292656 | -1.542224523 | -5.128713419 | 3.48E-07    | 2.37E-06    | 6.03532617  | -3.32255402  |
| MYH11            | -1.733889613 | -1.507879028 | -4.134165263 | 3.85E-05    | 0.000143488 | 1.573826818 | -3.326233879 |
| MEIOB            | -1.735200628 | -3.694125539 | -4.223946818 | 2.61E-05    | 0.000102274 | 1.938709501 | -3.329257889 |
| RP11-368D24__A.1 | -1.735352358 | 0.039478284  | -7.300652153 | 5.67E-13    | 2.39E-11    | 18.88841389 | -3.329608049 |
| ID3              | -1.738094027 | 1.099935362  | -6.495233806 | 1.28E-10    | 2.48E-09    | 13.63734938 | -3.335941587 |
| TBC1D4           | -1.739939952 | 2.692690563  | -7.26450797  | 7.32E-13    | 2.98E-11    | 18.640845   | -3.340212648 |
| EPCAM            | -1.74006235  | -1.108248116 | -4.265890979 | 2.17E-05    | 8.70E-05    | 2.111770577 | -3.340496043 |
| RGMB             | -1.741176809 | -0.287078453 | -6.588227066 | 7.05E-11    | 1.47E-09    | 14.21497573 | -3.34307752  |
| GEM              | -1.742619254 | -0.866285719 | -5.475828836 | 5.46E-08    | 4.74E-07    | 7.807134835 | -3.346421691 |
| LMCD1            | -1.743041511 | -2.20816423  | -5.607833615 | 2.62E-08    | 2.50E-07    | 8.509670564 | -3.347401284 |
| GSTM5            | -1.743361775 | -1.106597702 | -4.711232442 | 2.80E-06    | 1.45E-05    | 4.050680609 | -3.348144458 |
| NACAD            | -1.743602273 | -1.02761359  | -6.886184164 | 9.89E-12    | 2.82E-10    | 16.116396   | -3.34870264  |
| CRIP2            | -1.745403862 | 0.834747104  | -6.19888634  | 8.18E-10    | 1.23E-08    | 11.84720928 | -3.352887    |
| C11orf96         | -1.74878359  | 1.086045364  | -6.4472126   | 1.74E-10    | 3.24E-09    | 13.34202799 | -3.360750845 |
| FZD3             | -1.748876522 | 0.285032321  | -5.486489656 | 5.15E-08    | 4.50E-07    | 7.863286719 | -3.360967337 |
| RP11-87G24.6     | -1.751036026 | -3.281694902 | -5.162901422 | 2.91E-07    | 2.03E-06    | 6.204952017 | -3.366001981 |
| PRCD             | -1.75110336  | -1.541060643 | -5.934386839 | 4.01E-09    | 4.88E-08    | 10.3150501  | -3.366159084 |
| HAS1             | -1.751391962 | -2.721527442 | -4.023991817 | 6.14E-05    | 0.000216013 | 1.136436533 | -3.366832531 |
| SOWAHC           | -1.753058527 | -2.753853035 | -5.199941981 | 2.40E-07    | 1.71E-06    | 6.389938479 | -3.370724058 |
| CDC42BPA         | -1.753833849 | 1.462703846  | -4.20203971  | 2.87E-05    | 0.000110968 | 1.848977699 | -3.372536015 |
| DYNC1I1          | -1.755064903 | -3.10359009  | -4.125304591 | 4.00E-05    | 0.000148416 | 1.538227015 | -3.375415033 |
| ARG2             | -1.7551979   | 0.952771668  | -6.863523997 | 1.15E-11    | 3.21E-10    | 15.96908922 | -3.375726213 |
| RP11-275I4.1     | -1.756639148 | -2.390407263 | -6.562140161 | 8.34E-11    | 1.71E-09    | 14.05217502 | -3.379100239 |
| ALPK3            | -1.757100782 | 2.65331513   | -6.143689247 | 1.15E-09    | 1.64E-08    | 11.52234047 | -3.380181657 |
| STK24-AS1        | -1.757841993 | -0.018368307 | -11.01552581 | 9.03E-27    | 7.12E-24    | 49.91239746 | -3.381918735 |
| COL1A1           | -1.758802694 | 0.828663536  | -5.221082121 | 2.15E-07    | 1.55E-06    | 6.496078104 | -3.384171528 |
| SLC6A13          | -1.761236163 | -0.92258015  | -5.162635298 | 2.92E-07    | 2.03E-06    | 6.20362749  | -3.389884604 |
| PRRT4            | -1.761485783 | 1.976383002  | -5.05284851  | 5.14E-07    | 3.34E-06    | 5.66274454  | -3.390471183 |
| TSPAN15          | -1.763806439 | -0.912958273 | -5.473464325 | 5.53E-08    | 4.80E-07    | 7.794694617 | -3.395929336 |
| GYPA             | -1.763976876 | 2.341158179  | -3.891142893 | 0.000106104 | 0.000349417 | 0.624257837 | -3.396330548 |
| TCF7             | -1.764472928 | 4.683912837  | -6.999831645 | 4.58E-12    | 1.45E-10    | 16.86185283 | -3.397498532 |
| DSEL             | -1.765710642 | -0.270720532 | -5.464380022 | 5.81E-08    | 5.02E-07    | 7.74694723  | -3.400414559 |
| SCGB3A1          | -1.766771892 | -2.858961844 | -6.161227067 | 1.03E-09    | 1.50E-08    | 11.62526882 | -3.402916833 |
| RP11-465B22.3    | -1.767214591 | -0.176360643 | -5.402416937 | 8.15E-08    | 6.68E-07    | 7.423264673 | -3.403961196 |
| CD5              | -1.767703244 | 3.35054643   | -6.77556375  | 2.07E-11    | 5.17E-10    | 15.40148838 | -3.405114341 |
| RP5-1186N24.3    | -1.768200013 | -2.850169356 | -5.032482078 | 5.70E-07    | 3.66E-06    | 5.563621998 | -3.40628704  |
| CTD-2616J11.4    | -1.76962206  | -2.738758363 | -6.411533343 | 2.18E-10    | 3.97E-09    | 13.12391626 | -3.409646232 |
| HHIP-AS1         | -1.770541433 | -2.123890393 | -5.131457077 | 3.43E-07    | 2.34E-06    | 6.048899485 | -3.411819759 |
| MARCKSL1         | -1.771358468 | 5.464812278  | -10.8936099  | 3.02E-26    | 2.21E-23    | 48.7295742  | -3.413752506 |
| LINC00654        | -1.77169293  | 2.441331957  | -7.464357848 | 1.76E-13    | 8.83E-12    | 20.02355424 | -3.414544013 |
| PDZD2            | -1.771745641 | 0.140791259  | -5.187782822 | 2.56E-07    | 1.81E-06    | 6.329075317 | -3.414668771 |
| RP11-104L21.2    | -1.772053201 | -1.109912007 | -6.359082232 | 3.03E-10    | 5.27E-09    | 12.80530569 | -3.415396803 |

| gene          | logFC        | AveExpr      | t            | P.Value     | adj.P.Val   | B            | FoldChange   |
|---------------|--------------|--------------|--------------|-------------|-------------|--------------|--------------|
| RP11-734I18.1 | -1.772122142 | -3.129486213 | -3.554262316 | 0.000396033 | 0.001113001 | -0.599540367 | -3.415560015 |
| AP001046.6    | -1.772503718 | -3.123360461 | -6.289285185 | 4.68E-10    | 7.66E-09    | 12.38508206  | -3.41646351  |
| NKX3-1        | -1.773232592 | -0.042480582 | -5.906090769 | 4.74E-09    | 5.64E-08    | 10.15482936  | -3.418190001 |
| PRKG2         | -1.773721301 | -1.668412045 | -5.84215962  | 6.88E-09    | 7.81E-08    | 9.795468462  | -3.419348099 |
| IGSF3         | -1.774409972 | -0.816741138 | -5.251861568 | 1.82E-07    | 1.35E-06    | 6.651344446  | -3.420980718 |
| MTUS1         | -1.775514043 | -0.557005899 | -6.229751529 | 6.77E-10    | 1.05E-08    | 12.03004533  | -3.423599739 |
| RP11-139K1.2  | -1.776422542 | 0.394647922  | -8.325923779 | 2.61E-16    | 2.95E-14    | 26.36568591  | -3.425756339 |
| FNDC7         | -1.777186676 | 0.285376501  | -5.621040207 | 2.44E-08    | 2.36E-07    | 8.580823422  | -3.427571297 |
| RP11-567J24.4 | -1.777509322 | 0.033819031  | -7.301048769 | 5.66E-13    | 2.38E-11    | 18.89113665  | -3.428337928 |
| TMEM133       | -1.777627824 | -2.377366475 | -5.530948838 | 4.03E-08    | 3.64E-07    | 8.098568905  | -3.428619542 |
| MAPK15        | -1.777921193 | -1.736974057 | -5.531653516 | 4.01E-08    | 3.63E-07    | 8.102312535  | -3.429316815 |
| BMP2          | -1.778660966 | -1.265691431 | -4.303062553 | 1.84E-05    | 7.54E-05    | 2.266519412  | -3.431075721 |
| EXPH5         | -1.77872704  | -0.407787884 | -5.76897897  | 1.05E-08    | 1.13E-07    | 9.388610213  | -3.431232867 |
| SYNE2         | -1.778987023 | 5.620354456  | -7.059289651 | 3.05E-12    | 1.00E-10    | 17.25628019  | -3.431851251 |
| RPS20P22      | -1.781829773 | 0.570159147  | -5.628708805 | 2.33E-08    | 2.27E-07    | 8.622211586  | -3.43862019  |
| LOXL4         | -1.781839381 | -1.894082504 | -5.301063895 | 1.41E-07    | 1.07E-06    | 6.901340621  | -3.438643091 |
| CDC42EP4      | -1.782353349 | 3.902007228  | -8.894528804 | 2.54E-18    | 4.25E-16    | 30.88192151  | -3.439868344 |
| TRPC1         | -1.782604119 | -0.297331246 | -6.601872398 | 6.45E-11    | 1.36E-09    | 14.3003687   | -3.440466316 |
| EIF5A2        | -1.78274977  | 1.074541511  | -7.127567414 | 1.91E-12    | 6.56E-11    | 17.71294829  | -3.440813675 |
| AE000658.22   | -1.783859901 | -2.099223109 | -6.078593409 | 1.70E-09    | 2.30E-08    | 11.14268277  | -3.443462345 |
| RAPGEF5       | -1.785228754 | -0.49783671  | -5.281433208 | 1.56E-07    | 1.18E-06    | 6.80133267   | -3.44673111  |
| APBA1         | -1.786390341 | -2.093200932 | -4.385960733 | 1.27E-05    | 5.44E-05    | 2.616294923  | -3.449507365 |
| TRIB2         | -1.786938046 | 3.291877779  | -7.673388563 | 3.84E-14    | 2.40E-12    | 21.50575115  | -3.450817185 |
| SGIP1         | -1.787029206 | -1.181770026 | -6.457660383 | 1.63E-10    | 3.05E-09    | 13.40610791  | -3.451035241 |
| B4GALNT4      | -1.787056554 | -2.469442594 | -5.097275485 | 4.09E-07    | 2.73E-06    | 5.880290152  | -3.451100659 |
| HAP1          | -1.78714299  | -2.102367424 | -4.795815431 | 1.86E-06    | 1.02E-05    | 4.439782378  | -3.451307432 |
| HOOK1         | -1.787858127 | 0.468401578  | -6.490105518 | 1.32E-10    | 2.56E-09    | 13.60571505  | -3.453018652 |
| DHH           | -1.788754982 | -0.344432019 | -7.298042574 | 5.78E-13    | 2.42E-11    | 18.87050252  | -3.455165898 |
| NSUN7         | -1.788959563 | -0.42979128  | -5.551435834 | 3.59E-08    | 3.30E-07    | 8.207590257  | -3.45565589  |
| MORC4         | -1.789823102 | 0.168501795  | -6.839622391 | 1.35E-11    | 3.64E-10    | 15.8141924   | -3.457724925 |
| N4BP3         | -1.790361966 | 2.505164093  | -5.286461018 | 1.52E-07    | 1.15E-06    | 6.826913222  | -3.459016669 |
| ARHGAP42      | -1.791145721 | -0.112384451 | -5.490709807 | 5.03E-08    | 4.42E-07    | 7.885543242  | -3.460896315 |
| GALM          | -1.791147431 | 1.160047512  | -5.873478784 | 5.73E-09    | 6.62E-08    | 9.971058413  | -3.460900418 |
| C10orf35      | -1.791757223 | -2.896467788 | -5.892565778 | 5.13E-09    | 6.03E-08    | 10.0784996   | -3.462363565 |
| NTRK1         | -1.791832284 | 1.322993872  | -4.744489133 | 2.38E-06    | 1.26E-05    | 4.202878726  | -3.46254371  |
| RP5-884M6.1   | -1.792161785 | -3.691959517 | -4.962370768 | 8.13E-07    | 4.95E-06    | 5.225309194  | -3.46333462  |
| EPB42         | -1.793183805 | 3.754155056  | -4.43908967  | 1.00E-05    | 4.41E-05    | 2.843844221  | -3.465788952 |
| SNORD116-6    | -1.793499916 | -2.239705176 | -7.425506486 | 2.33E-13    | 1.11E-11    | 19.75211015  | -3.46654843  |
| RP11-677C1.2  | -1.793614729 | -3.030937128 | -4.571379621 | 5.43E-06    | 2.59E-05    | 3.421884082  | -3.466824317 |
| AC004540.4    | -1.795863596 | -3.056327968 | -4.8628036   | 1.34E-06    | 7.65E-06    | 4.752641041  | -3.472232602 |
| NDN           | -1.797469963 | -1.73447828  | -3.730826288 | 0.00020115  | 0.000612327 | 0.028426365  | -3.476100909 |
| EPB41L5       | -1.799172483 | 1.681514441  | -7.372483823 | 3.41E-13    | 1.55E-11    | 19.38370913  | -3.480205466 |
| GSTT1         | -1.801047309 | -1.5654784   | -4.327445313 | 1.65E-05    | 6.84E-05    | 2.368730563  | -3.484731038 |
| CD28          | -1.801877312 | 2.623823478  | -6.964823607 | 5.81E-12    | 1.77E-10    | 16.63103818  | -3.486736431 |
| CNN3          | -1.802951498 | -0.568319375 | -6.016463965 | 2.47E-09    | 3.18E-08    | 10.78383751  | -3.489333512 |
| GLRB          | -1.803268657 | -3.784436798 | -5.186494147 | 2.57E-07    | 1.82E-06    | 6.322632727  | -3.490100685 |
| LY6G6C        | -1.803554724 | -0.273238307 | -5.886693956 | 5.31E-09    | 6.21E-08    | 10.04541225  | -3.490792793 |
| XPNPEP2       | -1.804422304 | -2.172930768 | -6.627774365 | 5.46E-11    | 1.18E-09    | 14.46291052  | -3.492892649 |
| NPHS1         | -1.804626022 | -1.727704866 | -4.405305172 | 1.17E-05    | 5.05E-05    | 2.698841029  | -3.493385904 |
| UBXN10        | -1.805434923 | 0.299172305  | -5.287700584 | 1.51E-07    | 1.14E-06    | 6.833223444  | -3.495345151 |
| BVES          | -1.808269502 | -2.858398552 | -3.703564397 | 0.000223743 | 0.000671671 | -0.070468886 | -3.502219487 |
| SNORD116-4    | -1.808818354 | -1.842466986 | -7.483824766 | 1.53E-13    | 7.79E-12    | 20.16004235  | -3.503552109 |
| RP4-665J23.1  | -1.808946831 | -2.326969592 | -5.667799531 | 1.87E-08    | 1.87E-07    | 8.83401224   | -3.503864126 |
| LEF1-AS1      | -1.812786842 | -0.234876532 | -6.098235101 | 1.51E-09    | 2.08E-08    | 11.25684253  | -3.513202759 |
| PINLYP        | -1.813346075 | -0.289125841 | -5.807314533 | 8.42E-09    | 9.34E-08    | 9.601143208  | -3.514564849 |
| SYNGR3        | -1.814474338 | -0.905788557 | -7.657983432 | 4.30E-14    | 2.60E-12    | 21.39526814  | -3.517314498 |
| LINC00649     | -1.814651639 | 3.475753092  | -5.814215215 | 8.09E-09    | 9.02E-08    | 9.63954073   | -3.517746787 |
| RP11-20D14.6  | -1.81552924  | 1.591295741  | -4.189506995 | 3.03E-05    | 0.000116439 | 1.797846282  | -3.519887305 |
| PLSCR4        | -1.816256597 | -1.461740067 | -4.815526718 | 1.69E-06    | 9.36E-06    | 4.531410429  | -3.521662359 |
| PLK2          | -1.816867352 | 3.762196139  | -7.125615533 | 1.93E-12    | 6.63E-11    | 17.69983804  | -3.523153546 |
| LAMB3         | -1.817292405 | 1.354772666  | -5.802070847 | 8.68E-09    | 9.59E-08    | 9.571994275  | -3.524191707 |

| gene          | logFC        | AveExpr      | t            | P.Value     | adj.P.Val   | B            | FoldChange   |
|---------------|--------------|--------------|--------------|-------------|-------------|--------------|--------------|
| KRT18P15      | -1.818084621 | -1.117892932 | -6.527055953 | 1.05E-10    | 2.08E-09    | 13.83416169  | -3.52612745  |
| RP11-659G9.3  | -1.8192403   | -2.384869649 | -7.601782508 | 6.50E-14    | 3.76E-12    | 20.99388517  | -3.528953205 |
| FAM50B        | -1.819747552 | -0.689738337 | -6.342510541 | 3.36E-10    | 5.78E-09    | 12.70514499  | -3.530194206 |
| MACROD2       | -1.820729329 | -0.193697316 | -5.31831507  | 1.28E-07    | 9.89E-07    | 6.989516207  | -3.532597377 |
| DLL4          | -1.821293984 | -0.985509628 | -6.355763196 | 3.10E-10    | 5.37E-09    | 12.78522581  | -3.533980268 |
| DPY19L2       | -1.821359417 | 2.104694512  | -4.654091648 | 3.67E-06    | 1.84E-05    | 3.791573039  | -3.534140553 |
| CAMK2D        | -1.822574472 | 3.195816638  | -7.453120738 | 1.91E-13    | 9.40E-12    | 19.94491286  | -3.537118301 |
| HOMER1        | -1.826092608 | 1.324583636  | -7.382819895 | 3.16E-13    | 1.45E-11    | 19.45533781  | -3.545754396 |
| PLOD2         | -1.826789426 | -1.959253218 | -4.358138228 | 1.44E-05    | 6.07E-05    | 2.498185129  | -3.547467399 |
| FAM160A1      | -1.827176516 | -1.772072051 | -5.494492839 | 4.92E-08    | 4.33E-07    | 7.90550818   | -3.548419348 |
| IKZF2         | -1.827511174 | 4.248671026  | -6.382311212 | 2.62E-10    | 4.65E-09    | 12.94611022  | -3.54924256  |
| ENO1P1        | -1.828269514 | -2.926314055 | -6.553244361 | 8.83E-11    | 1.80E-09    | 13.99679476  | -3.551108681 |
| RP11-510H23.1 | -1.828682449 | -2.317632302 | -5.294713615 | 1.45E-07    | 1.11E-06    | 6.868950861  | -3.552125241 |
| DTX1          | -1.829121842 | 0.923250485  | -5.681598006 | 1.73E-08    | 1.75E-07    | 8.909103746  | -3.553207255 |
| CHRNA6        | -1.829807833 | -2.48042862  | -5.252126173 | 1.82E-07    | 1.35E-06    | 6.652682992  | -3.554897181 |
| CDH1          | -1.831009163 | 0.722347522  | -4.883452779 | 1.21E-06    | 7.00E-06    | 4.849915918  | -3.557858572 |
| ETV2          | -1.831026528 | -1.446689314 | -8.737840099 | 9.34E-18    | 1.39E-15    | 29.61168489  | -3.557901396 |
| RP11-382A20.3 | -1.831185105 | 0.876369036  | -5.264781134 | 1.70E-07    | 1.27E-06    | 6.716774704  | -3.558292491 |
| EPHA4         | -1.831380074 | 1.247900861  | -7.059227908 | 3.05E-12    | 1.00E-10    | 17.25586903  | -3.558773399 |
| KREMEN2       | -1.832235112 | -2.521153899 | -6.50974485  | 1.17E-10    | 2.28E-09    | 13.72698683  | -3.560883193 |
| RP3-511B24.5  | -1.832969394 | -2.463874515 | -6.953110502 | 6.30E-12    | 1.91E-10    | 16.55404653  | -3.562696021 |
| ARHGAP39      | -1.834640519 | -2.072146057 | -5.711682455 | 1.46E-08    | 1.51E-07    | 9.073418146  | -3.566825209 |
| ROBO2         | -1.835058732 | -3.6092132   | -3.765468115 | 0.00017553  | 0.000542654 | 0.155111391  | -3.567859323 |
| CTC-260E6.2   | -1.836492835 | -2.116807171 | -6.079887547 | 1.69E-09    | 2.28E-08    | 11.1501939   | -3.571407696 |
| LTA           | -1.837301146 | -0.445498222 | -7.222769016 | 9.82E-13    | 3.79E-11    | 18.35633479  | -3.573409239 |
| DPF3          | -1.837742595 | 0.055178878  | -6.659724637 | 4.43E-11    | 9.86E-10    | 14.66421184  | -3.574502832 |
| DCLK2         | -1.837761601 | -1.220768635 | -4.845380687 | 1.46E-06    | 8.26E-06    | 4.670870804  | -3.574549922 |
| MAOA          | -1.838438908 | -0.899095566 | -5.538604583 | 3.86E-08    | 3.51E-07    | 8.139264439  | -3.576228473 |
| FAM115C       | -1.840599349 | 2.069046615  | -7.585034431 | 7.34E-14    | 4.13E-12    | 20.87478248  | -3.581587898 |
| PKP2          | -1.840758397 | -0.795436619 | -4.050547383 | 5.49E-05    | 0.000195512 | 1.240816102  | -3.581982768 |
| PRR15         | -1.840924708 | -3.230423387 | -5.163238574 | 2.91E-07    | 2.02E-06    | 6.206630145  | -3.582395715 |
| KIAA1257      | -1.841491805 | -0.517562889 | -6.302256012 | 4.32E-10    | 7.20E-09    | 12.46285019  | -3.583804167 |
| ACHE          | -1.845454808 | 0.70708514   | -4.999498333 | 6.74E-07    | 4.21E-06    | 5.40390012   | -3.593662212 |
| CYP46A1       | -1.846901516 | -1.35928721  | -5.132233412 | 3.41E-07    | 2.33E-06    | 6.052741389  | -3.597267677 |
| RANBP17       | -1.847068813 | 1.222589395  | -4.410283469 | 1.14E-05    | 4.95E-05    | 2.720140895  | -3.597684845 |
| GPC3          | -1.847220806 | -3.34287958  | -5.091080939 | 4.22E-07    | 2.81E-06    | 5.849848652  | -3.598063893 |
| RNF144A-AS1   | -1.848082847 | -1.136405349 | -5.773149853 | 1.03E-08    | 1.11E-07    | 9.411669707  | -3.600214455 |
| GLIS2         | -1.850152462 | -1.997399994 | -5.67808369  | 1.77E-08    | 1.79E-07    | 8.889962511  | -3.605382841 |
| DLK1          | -1.851065375 | -3.120862724 | -3.961659242 | 7.95E-05    | 0.000271205 | 0.894046087  | -3.607664989 |
| SLC25A21      | -1.852650245 | -2.506034438 | -4.988478585 | 7.13E-07    | 4.41E-06    | 5.350760584  | -3.61163036  |
| PRPH2         | -1.852784179 | -3.105657674 | -5.721192798 | 1.38E-08    | 1.44E-07    | 9.125530902  | -3.611965666 |
| CES1          | -1.854142326 | -0.045769043 | -3.040843934 | 0.002418114 | 0.005474547 | -2.256329308 | -3.615367555 |
| SNORD107      | -1.858605396 | -1.403248486 | -8.175350068 | 8.50E-16    | 8.35E-14    | 25.21326742  | -3.626569245 |
| PCDH10        | -1.858618064 | -3.680569952 | -4.218775705 | 2.67E-05    | 0.000104225 | 1.917487913  | -3.62660109  |
| PPP1R14A      | -1.858901503 | -2.248448123 | -5.154265841 | 3.05E-07    | 2.11E-06    | 6.162005022  | -3.62731366  |
| RPL5P7        | -1.860389623 | -2.06414108  | -6.609279391 | 6.15E-11    | 1.31E-09    | 14.34678989  | -3.631057113 |
| PTPN14        | -1.863641106 | 1.825597563  | -4.249499497 | 2.33E-05    | 9.27E-05    | 2.043942984  | -3.639249862 |
| GAS1          | -1.863763155 | -2.67222795  | -4.86861451  | 1.30E-06    | 7.46E-06    | 4.779975482  | -3.639557747 |
| TSKU          | -1.864878507 | -2.459914955 | -6.015567889 | 2.48E-09    | 3.19E-08    | 10.77868711  | -3.642372588 |
| CTD-2033A16.1 | -1.865410194 | -1.884130266 | -8.074634097 | 1.86E-15    | 1.68E-13    | 24.45274537  | -3.643715185 |
| PABPC4L       | -1.867580706 | -3.675007198 | -4.341848137 | 1.55E-05    | 6.46E-05    | 2.429368013  | -3.649201223 |
| NUDT16P       | -1.867595114 | -0.761836454 | -4.49448997  | 7.75E-06    | 3.52E-05    | 3.083929391  | -3.649237668 |
| RP3-511B24.4  | -1.868875074 | -2.547758952 | -6.814519457 | 1.60E-11    | 4.21E-10    | 15.6520415   | -3.65247671  |
| DARC          | -1.869987583 | -0.855505163 | -4.584760334 | 5.10E-06    | 2.45E-05    | 3.481259041  | -3.65529434  |
| FAM134B       | -1.870116693 | 1.387004426  | -6.532142694 | 1.01E-10    | 2.03E-09    | 13.86570405  | -3.655621475 |
| GRTP1         | -1.870133191 | -2.508331982 | -5.040133015 | 5.48E-07    | 3.53E-06    | 5.600814094  | -3.655663279 |
| LGR4          | -1.872358538 | 1.460254284  | -5.386765088 | 8.87E-08    | 7.17E-07    | 7.342054274  | -3.661306465 |
| OPTN          | -1.87542817  | 3.672255489  | -7.728106884 | 2.56E-14    | 1.69E-12    | 21.89978119  | -3.669104947 |
| HPCAL4        | -1.875863934 | -0.071828919 | -6.933487369 | 7.19E-12    | 2.13E-10    | 16.42532571  | -3.670213361 |
| AC092198.1    | -1.877635185 | -3.048219536 | -6.74126369  | 2.60E-11    | 6.28E-10    | 15.18196697  | -3.674722187 |
| RP11-13K12.1  | -1.877729698 | -0.330497148 | -3.891010479 | 0.000106161 | 0.000349547 | 0.623755658  | -3.674962931 |

| gene          | logFC        | AveExpr      | t            | P.Value     | adj.P.Val   | B           | FoldChange   |
|---------------|--------------|--------------|--------------|-------------|-------------|-------------|--------------|
| ITGB4         | -1.879417345 | 1.45608264   | -5.968439706 | 3.28E-09    | 4.10E-08    | 10.50881546 | -3.679264374 |
| ROR2          | -1.880140207 | -2.070825961 | -5.234280448 | 2.00E-07    | 1.46E-06    | 6.562550846 | -3.681108329 |
| MYO1D         | -1.880755598 | 1.896085874  | -6.306043805 | 4.22E-10    | 7.05E-09    | 12.48558833 | -3.682678866 |
| CSPG5         | -1.885441042 | -0.621540123 | -7.060436979 | 3.03E-12    | 9.97E-11    | 17.26392102 | -3.694658552 |
| AHSP          | -1.886834229 | 2.364597757  | -4.382884502 | 1.29E-05    | 5.51E-05    | 2.603200354 | -3.698228147 |
| GBP1          | -1.887109299 | 2.289972939  | -6.681310941 | 3.85E-11    | 8.75E-10    | 14.80071807 | -3.698933335 |
| RBFOX3        | -1.891140214 | -3.366292639 | -4.499876742 | 7.56E-06    | 3.45E-05    | 3.107426501 | -3.709282669 |
| MAP3K13       | -1.891827529 | 0.931635524  | -6.614377073 | 5.95E-11    | 1.27E-09    | 14.37876592 | -3.711050232 |
| RP11-153M7.3  | -1.892253514 | -1.343782694 | -3.90560409  | 0.000100041 | 0.000331552 | 0.679201533 | -3.712146157 |
| IGFBP4        | -1.892330627 | 1.082824422  | -6.759475498 | 2.30E-11    | 5.65E-10    | 15.29839615 | -3.712344578 |
| DNAH17        | -1.892432981 | -0.454910546 | -6.276207443 | 5.08E-10    | 8.17E-09    | 12.30682311 | -3.712607965 |
| RP1-34L19.1   | -1.893542875 | -0.58328554  | -6.862205719 | 1.16E-11    | 3.22E-10    | 15.96053313 | -3.715465248 |
| SLCO5A1       | -1.893711745 | 1.461875053  | -4.105607667 | 4.35E-05    | 0.000159475 | 1.459354813 | -3.715900173 |
| VLDLR         | -1.894342583 | 2.782865232  | -4.342967625 | 1.54E-05    | 6.43E-05    | 2.434089314 | -3.717525358 |
| ANKRD31       | -1.895189699 | -1.598677611 | -7.915644957 | 6.26E-15    | 4.94E-13    | 23.26912037 | -3.719708839 |
| SPOCK2        | -1.899081726 | 5.73003934   | -7.574799901 | 7.91E-14    | 4.40E-12    | 20.80211601 | -3.729757223 |
| FAM127C       | -1.900075558 | -3.002681217 | -5.001669864 | 6.67E-07    | 4.17E-06    | 5.414384875 | -3.732327435 |
| RORA          | -1.901362178 | 3.94109997   | -7.489297207 | 1.47E-13    | 7.55E-12    | 20.1984686  | -3.735657471 |
| KCP           | -1.901483154 | -0.645638884 | -7.195554532 | 1.19E-12    | 4.40E-11    | 18.17162722 | -3.735970735 |
| GABRE         | -1.90443946  | -2.589502165 | -3.769508307 | 0.000172751 | 0.000535379 | 0.169960535 | -3.743634168 |
| GCM1          | -1.90480296  | -1.997048104 | -5.925883304 | 4.22E-09    | 5.09E-08    | 10.26682538 | -3.74457753  |
| CHSY3         | -1.90671921  | -2.785313345 | -5.389699213 | 8.73E-08    | 7.08E-07    | 7.357261168 | -3.749554543 |
| FCHO2         | -1.907147529 | 4.04164909   | -8.515523959 | 5.73E-17    | 7.58E-15    | 27.84288394 | -3.750667908 |
| ADAMTS15      | -1.907602949 | -2.968889126 | -5.996102792 | 2.78E-09    | 3.53E-08    | 10.66698356 | -3.751852078 |
| CTD-2653D5.1  | -1.909299921 | -1.76687511  | -5.870346792 | 5.84E-09    | 6.73E-08    | 9.95345948  | -3.756267796 |
| PRRG1         | -1.916497954 | -3.078954178 | -4.430952923 | 1.04E-05    | 4.55E-05    | 2.808823786 | -3.775055759 |
| PVRL3         | -1.9170659   | -1.893246729 | -6.620292833 | 5.73E-11    | 1.23E-09    | 14.41590186 | -3.776542179 |
| CYB5R2        | -1.917492647 | -2.571077035 | -4.988008109 | 7.14E-07    | 4.41E-06    | 5.348494336 | -3.777659441 |
| NT5E          | -1.919018946 | 0.766240284  | -5.666648375 | 1.88E-08    | 1.88E-07    | 8.827755381 | -3.781658128 |
| DNALI1        | -1.919136878 | -2.472224485 | -6.770743124 | 2.14E-11    | 5.30E-10    | 15.37057468 | -3.781967271 |
| PMEPA1        | -1.919507155 | 1.247929846  | -6.624976852 | 5.56E-11    | 1.20E-09    | 14.44532722 | -3.782938062 |
| B3GNT7        | -1.922893529 | 2.799932117  | -5.746932248 | 1.19E-08    | 1.27E-07    | 9.266980436 | -3.791828014 |
| MAFA          | -1.924351424 | -0.430447445 | -5.433221565 | 6.89E-08    | 5.79E-07    | 7.583746118 | -3.795661727 |
| RP11-384P7.7  | -1.925774223 | -3.183304512 | -4.648657337 | 3.77E-06    | 1.88E-05    | 3.767088733 | -3.79940689  |
| CCDC85C       | -1.925934604 | 0.42651823   | -6.517572805 | 1.11E-10    | 2.19E-09    | 13.77541806 | -3.799829285 |
| ZFP112        | -1.929283694 | -2.285130051 | -5.178587978 | 2.68E-07    | 1.89E-06    | 6.283139951 | -3.808660503 |
| MTX3          | -1.929848152 | 2.511419694  | -7.385665113 | 3.10E-13    | 1.44E-11    | 19.47507093 | -3.810150942 |
| CACNB2        | -1.931359098 | -3.286941271 | -4.545280179 | 6.13E-06    | 2.87E-05    | 3.306551206 | -3.814143434 |
| ELN           | -1.932345504 | -1.610288315 | -4.834041499 | 1.54E-06    | 8.66E-06    | 4.617803703 | -3.816752148 |
| RUNDC3A       | -1.932900988 | 0.520263543  | -5.628195362 | 2.34E-08    | 2.28E-07    | 8.619438828 | -3.818222003 |
| NR4A3         | -1.933500874 | 3.527097127  | -6.783049396 | 1.97E-11    | 4.97E-10    | 15.44953221 | -3.819809986 |
| CMTM8         | -1.934139549 | -1.186378847 | -7.250934479 | 8.06E-13    | 3.22E-11    | 18.54815999 | -3.821501375 |
| RP11-113K21.1 | -1.939073498 | -1.830419672 | -8.391264035 | 1.55E-16    | 1.87E-14    | 26.8714868  | -3.834593102 |
| FREM1         | -1.939095013 | -2.615280255 | -4.132322486 | 3.88E-05    | 0.000144489 | 1.566416952 | -3.834650287 |
| OLFML3        | -1.941834008 | -1.018222306 | -7.15212368  | 1.61E-12    | 5.71E-11    | 17.87816383 | -3.84193739  |
| SOX8          | -1.942473841 | -2.550023353 | -6.273347582 | 5.17E-10    | 8.29E-09    | 12.28972943 | -3.843641661 |
| OTUD7B        | -1.943094837 | 2.137482696  | -7.768166326 | 1.90E-14    | 1.31E-12    | 22.1898318  | -3.845296479 |
| SLC4A1        | -1.943132412 | 7.150774049  | -4.352683323 | 1.48E-05    | 6.19E-05    | 2.475113344 | -3.845396632 |
| RAB34         | -1.944754253 | 4.023590201  | -5.611634461 | 2.57E-08    | 2.46E-07    | 8.530132161 | -3.849721958 |
| GRHL1         | -1.94681486  | 0.533001338  | -7.433959501 | 2.19E-13    | 1.06E-11    | 19.81106085 | -3.855224462 |
| LAMC1         | -1.948862251 | 1.822003532  | -5.114554669 | 3.74E-07    | 2.53E-06    | 5.965390227 | -3.860699461 |
| ONECUT2       | -1.950686536 | -3.249581162 | -4.563835461 | 5.62E-06    | 2.67E-05    | 3.388481437 | -3.865584395 |
| SH3BGR12      | -1.953848961 | 0.841208349  | -6.212004368 | 7.55E-10    | 1.15E-08    | 11.92481357 | -3.874067152 |
| AFAP111       | -1.955116385 | -1.198259069 | -5.526371758 | 4.13E-08    | 3.71E-07    | 8.074263923 | -3.877472057 |
| SELENBP1      | -1.956812456 | 3.524171884  | -4.649691874 | 3.75E-06    | 1.87E-05    | 3.771747732 | -3.882033199 |
| PHKA1         | -1.957509316 | -0.619843285 | -5.305588142 | 1.37E-07    | 1.05E-06    | 6.924439075 | -3.883908776 |
| ADRA2B        | -1.959520458 | -0.83611329  | -5.967857818 | 3.29E-09    | 4.11E-08    | 10.50549575 | -3.88932679  |
| FAM159A       | -1.960665382 | 1.602082046  | -8.612602259 | 2.61E-17    | 3.65E-15    | 28.61041157 | -3.892414588 |
| CD3D          | -1.960762319 | 1.838794643  | -7.915640324 | 6.26E-15    | 4.94E-13    | 23.26908618 | -3.892676134 |
| EFNB2         | -1.961438613 | -0.559095897 | -7.177500292 | 1.35E-12    | 4.88E-11    | 18.04943905 | -3.894501337 |
| NUDT11        | -1.965602381 | -3.395387395 | -6.287678007 | 4.73E-10    | 7.73E-09    | 12.37545636 | -3.905757508 |

| gene         | logFC        | AveExpr      | t            | P.Value     | adj.P.Val   | B            | FoldChange   |
|--------------|--------------|--------------|--------------|-------------|-------------|--------------|--------------|
| SOBP         | -1.966877622 | -1.902731671 | -5.374917718 | 9.45E-08    | 7.58E-07    | 7.280731689  | -3.909211448 |
| SNORD64      | -1.967735612 | -1.127199921 | -8.734264824 | 9.62E-18    | 1.42E-15    | 29.58292773  | -3.911537    |
| SMAGP        | -1.968641423 | 0.356107055  | -8.384931308 | 1.63E-16    | 1.94E-14    | 26.82231402  | -3.913993671 |
| GPRC5A       | -1.970925973 | -1.792551492 | -5.426806975 | 7.13E-08    | 5.97E-07    | 7.550257281  | -3.920196504 |
| PLS3         | -1.973582837 | -2.186941928 | -4.841924337 | 1.48E-06    | 8.36E-06    | 4.654682589  | -3.927422582 |
| AC003102.1   | -1.975312148 | 4.800225305  | -4.40525856  | 1.17E-05    | 5.05E-05    | 2.698641707  | -3.932133077 |
| GLIS3        | -1.985808549 | -0.788833293 | -4.967414687 | 7.93E-07    | 4.84E-06    | 5.249496966  | -3.960845833 |
| IGF2BP1      | -1.994671037 | -3.289210845 | -3.578863068 | 0.000360974 | 0.001023954 | -0.513824889 | -3.985252232 |
| ZNF718       | -1.994946152 | 3.681404546  | -7.074525067 | 2.75E-12    | 9.14E-11    | 17.357835    | -3.986012271 |
| SLC6A8       | -1.99579135  | 3.461702377  | -6.146134135 | 1.13E-09    | 1.62E-08    | 11.53667301  | -3.988348148 |
| ARHGAP32     | -1.995823363 | 3.029885372  | -6.215458006 | 7.39E-10    | 1.13E-08    | 11.94527009  | -3.988436649 |
| KLC3         | -1.996267466 | -1.858222482 | -5.779529258 | 9.89E-09    | 1.08E-07    | 9.446969632  | -3.989664594 |
| PPL          | -1.997468537 | -2.668876451 | -4.468677573 | 8.73E-06    | 3.91E-05    | 2.971711268  | -3.992987449 |
| WFS1         | -2.002439135 | -0.863600008 | -6.379010574 | 2.68E-10    | 4.73E-09    | 12.92607419  | -4.006768438 |
| EVC          | -2.002940043 | -1.045934335 | -4.566405393 | 5.55E-06    | 2.64E-05    | 3.399854159  | -4.008159842 |
| C1orf116     | -2.003791351 | 1.432716084  | -6.607773976 | 6.21E-11    | 1.32E-09    | 14.33735127  | -4.01052568  |
| STXBP5L      | -2.004405607 | -3.335231112 | -4.272313408 | 2.11E-05    | 8.48E-05    | 2.138415172  | -4.012233606 |
| HLF          | -2.005172045 | -1.733669891 | -5.964692158 | 3.35E-09    | 4.17E-08    | 10.48744074  | -4.014365689 |
| ARSI         | -2.007015796 | 0.62141553   | -3.907080172 | 9.94E-05    | 0.00032984  | 0.684820872  | -4.01949929  |
| CCBP2        | -2.00731124  | 0.486631345  | -8.627613783 | 2.31E-17    | 3.25E-15    | 28.72976935  | -4.020322513 |
| AC005189.6   | -2.008278853 | -1.838724319 | -7.461880834 | 1.79E-13    | 8.96E-12    | 20.00621006  | -4.02301984  |
| EVC2         | -2.009717459 | -1.235243147 | -4.875681754 | 1.25E-06    | 7.23E-06    | 4.813261714  | -4.027033459 |
| ELOVL6       | -2.009820909 | 2.982886233  | -9.051907627 | 6.74E-19    | 1.41E-16    | 32.17720535  | -4.027322233 |
| ZDHC8P1      | -2.009862079 | -3.274389901 | -5.197921989 | 2.42E-07    | 1.72E-06    | 6.379817965  | -4.027437161 |
| DUOX2        | -2.01180963  | -1.557914152 | -6.6121498   | 6.04E-11    | 1.29E-09    | 14.36479221  | -4.032877628 |
| ANXA5        | -2.012836407 | 4.535696005  | -5.594821166 | 2.82E-08    | 2.67E-07    | 8.439717685  | -4.035748879 |
| ZDBF2        | -2.014052628 | 1.738090072  | -6.782163909 | 1.98E-11    | 4.98E-10    | 15.44384651  | -4.039152533 |
| LY9          | -2.015971271 | 3.649734929  | -10.07030021 | 7.95E-23    | 3.73E-20    | 41.01934524  | -4.044527783 |
| TRAT1        | -2.016494088 | 1.916507063  | -7.601374828 | 6.52E-14    | 3.76E-12    | 20.99098319  | -4.045993741 |
| RP4-811H24.9 | -2.016996323 | -1.908625808 | -6.507552088 | 1.18E-10    | 2.31E-09    | 13.71342991  | -4.047402487 |
| DENND2C      | -2.019208145 | -0.060472582 | -5.903861816 | 4.80E-09    | 5.70E-08    | 10.14223876  | -4.053612393 |
| MIR22        | -2.023154308 | 0.582705514  | -8.154624106 | 9.99E-16    | 9.57E-14    | 25.0560853   | -4.064715304 |
| FBLN2        | -2.023922959 | 1.348459089  | -5.725764947 | 1.35E-08    | 1.41E-07    | 9.150613351  | -4.066881514 |
| NDRG4        | -2.024688394 | -2.365492536 | -7.029277592 | 3.75E-12    | 1.20E-10    | 17.05681004  | -4.069039807 |
| PRDX2        | -2.028374528 | 4.685353728  | -7.658820393 | 4.27E-14    | 2.59E-12    | 21.40126559  | -4.079449632 |
| RP4-575N6.5  | -2.028667363 | -2.27489868  | -7.218672655 | 1.01E-12    | 3.87E-11    | 18.32849207  | -4.080277755 |
| SLC14A1      | -2.029829348 | 2.603212347  | -6.815322378 | 1.59E-11    | 4.20E-10    | 15.65721949  | -4.083565441 |
| ACSL6        | -2.031769572 | 2.390862401  | -6.059243316 | 1.91E-09    | 2.54E-08    | 11.03055301  | -4.089060962 |
| ZNF486       | -2.031879346 | 0.714788222  | -6.857687686 | 1.20E-11    | 3.30E-10    | 15.93122209  | -4.089372111 |
| FOXJ1        | -2.032278798 | -2.287719336 | -7.08661924  | 2.53E-12    | 8.47E-11    | 17.43859262  | -4.090504529 |
| SMAD7        | -2.034586168 | 3.727644623  | -8.23677277  | 5.26E-16    | 5.46E-14    | 25.68114224  | -4.0970519   |
| RBFOX2       | -2.036473564 | 0.843424742  | -5.454523288 | 6.13E-08    | 5.24E-07    | 7.695224586  | -4.102415346 |
| ABCB1        | -2.03652752  | 2.816121216  | -6.368783601 | 2.85E-10    | 5.01E-09    | 12.8640537   | -4.102568778 |
| IFI27        | -2.037532452 | 1.098320139  | -5.220585822 | 2.15E-07    | 1.55E-06    | 6.49358162   | -4.105427481 |
| LRIG1        | -2.039016119 | 2.425943206  | -7.647464445 | 4.65E-14    | 2.77E-12    | 21.31994153  | -4.109651673 |
| FAM84B       | -2.039090786 | 2.821016737  | -8.219874582 | 6.01E-16    | 6.17E-14    | 25.55211755  | -4.109864375 |
| AGAP1        | -2.045767539 | 0.599713406  | -7.276038273 | 6.75E-13    | 2.79E-11    | 18.71970121  | -4.128928797 |
| RGS16        | -2.052408701 | -0.108715738 | -5.740884556 | 1.23E-08    | 1.30E-07    | 9.233692192  | -4.147979319 |
| NUAK1        | -2.053993861 | -1.886265475 | -5.526908562 | 4.12E-08    | 3.71E-07    | 8.077113453  | -4.152539413 |
| DFNA5        | -2.054591371 | -0.4907086   | -5.920429782 | 4.35E-09    | 5.24E-08    | 10.2359317   | -4.154259595 |
| TMIGD2       | -2.054606132 | 1.073036629  | -6.192692084 | 8.50E-10    | 1.27E-08    | 11.8106179   | -4.154302097 |
| GYG2         | -2.05502548  | -0.710300135 | -5.794388587 | 9.08E-09    | 9.97E-08    | 9.529334179  | -4.155509805 |
| SLC38A3      | -2.055728968 | -3.083398407 | -5.835436942 | 7.16E-09    | 8.09E-08    | 9.757892485  | -4.157536611 |
| DAB2IP       | -2.056175553 | -0.578183321 | -6.807419077 | 1.67E-11    | 4.35E-10    | 15.60627584  | -4.158823772 |
| MAP1B        | -2.056239294 | -2.558072969 | -5.511629556 | 4.48E-08    | 3.99E-07    | 7.99610952   | -4.159007522 |
| CD6          | -2.057199529 | 4.320100114  | -7.667590383 | 4.00E-14    | 2.48E-12    | 21.46414434  | -4.161776613 |
| ZNF721       | -2.057991823 | 3.764600102  | -10.87784156 | 3.53E-26    | 2.48E-23    | 48.57735185  | -4.164062788 |
| FERMT2       | -2.058253959 | -1.031655046 | -6.621082381 | 5.70E-11    | 1.23E-09    | 14.42086052  | -4.164819465 |
| GAD1         | -2.060053496 | -0.335411445 | -4.609363897 | 4.54E-06    | 2.21E-05    | 3.59086847   | -4.170017666 |
| GPR34        | -2.060869761 | -1.329018356 | -6.155275364 | 1.07E-09    | 1.55E-08    | 11.5903081   | -4.172377696 |
| MYO16        | -2.062736726 | -2.779996226 | -4.959878849 | 8.23E-07    | 5.01E-06    | 5.213368006  | -4.17778059  |

| gene           | logFC        | AveExpr      | t            | P.Value     | adj.P.Val   | B            | FoldChange   |
|----------------|--------------|--------------|--------------|-------------|-------------|--------------|--------------|
| CNTN4          | -2.06561407  | -3.475229308 | -4.145193465 | 3.67E-05    | 0.000137851 | 1.618238382  | -4.186121165 |
| COL20A1        | -2.065939001 | -0.258741621 | -6.120907916 | 1.32E-09    | 1.85E-08    | 11.38904545  | -4.187064091 |
| TBC1D12        | -2.070573208 | 0.641348412  | -5.230642421 | 2.04E-07    | 1.48E-06    | 6.544212209  | -4.200535349 |
| ZNF544         | -2.071076485 | 3.84392922   | -8.833443647 | 4.23E-18    | 6.73E-16    | 30.38441236  | -4.20200094  |
| JMY            | -2.073557128 | 5.426285607  | -9.257942805 | 1.15E-19    | 2.99E-17    | 33.90215469  | -4.209232288 |
| SNORD116-14    | -2.079348489 | -1.208670178 | -8.321683523 | 2.69E-16    | 3.04E-14    | 26.33298127  | -4.226163225 |
| NRP2           | -2.081205778 | -0.054729611 | -6.253114359 | 5.86E-10    | 9.24E-09    | 12.16899956  | -4.231607385 |
| CDK20          | -2.082857341 | 0.415048869  | -7.517428149 | 1.20E-13    | 6.37E-12    | 20.39639507  | -4.236454403 |
| ZNF229         | -2.082934676 | -1.435988957 | -5.636313355 | 2.24E-08    | 2.19E-07    | 8.663306466  | -4.236681502 |
| RRAS2          | -2.08331168  | 1.895133266  | -8.412356154 | 1.31E-16    | 1.61E-14    | 27.03549765  | -4.237788774 |
| RP11-566K19.6  | -2.085424738 | -1.015662239 | -4.574460362 | 5.35E-06    | 2.55E-05    | 3.435539654  | -4.244000239 |
| ZNF667         | -2.087314017 | 1.236593642  | -5.777959755 | 9.98E-09    | 1.09E-07    | 9.438281523  | -4.249561606 |
| SNORD108       | -2.088671977 | -0.751448726 | -8.901979712 | 2.39E-18    | 4.06E-16    | 30.94280673  | -4.253563457 |
| PPP2R3A        | -2.089408657 | -1.848142265 | -5.963200631 | 3.38E-09    | 4.21E-08    | 10.47893707  | -4.255735997 |
| ABCC13         | -2.089681466 | -0.9241421   | -5.422334596 | 7.31E-08    | 6.09E-07    | 7.526930311  | -4.25654082  |
| PLCG1          | -2.090582246 | 5.331267696  | -9.937549787 | 2.70E-22    | 1.16E-19    | 39.82238657  | -4.25919932  |
| CKB            | -2.090924331 | 3.00750592   | -8.243192093 | 5.00E-16    | 5.25E-14    | 25.73021728  | -4.260209362 |
| ACVR2B-AS1     | -2.093976009 | -2.684395053 | -7.797919136 | 1.52E-14    | 1.08E-12    | 22.40611999  | -4.269230357 |
| NKAIN2         | -2.096388892 | -3.407356913 | -4.551832931 | 5.94E-06    | 2.80E-05    | 3.335448045  | -4.276376548 |
| ST8SIA1        | -2.098229527 | -1.276135742 | -6.809470376 | 1.65E-11    | 4.30E-10    | 15.61949306  | -4.281835963 |
| LAYN           | -2.098731638 | -1.332140232 | -7.675297436 | 3.78E-14    | 2.38E-12    | 21.51945506  | -4.283326458 |
| RTN1           | -2.098742787 | -1.027864305 | -5.143004153 | 3.23E-07    | 2.22E-06    | 6.106100302  | -4.283359561 |
| RND1           | -2.09953192  | 0.358298448  | -6.993282302 | 4.79E-12    | 1.51E-10    | 16.81859175  | -4.285703135 |
| ZNF483         | -2.101571041 | 0.190536536  | -7.978977297 | 3.87E-15    | 3.22E-13    | 23.73811902  | -4.291764877 |
| EPN2           | -2.101924113 | 2.639956601  | -8.281094177 | 3.71E-16    | 3.98E-14    | 26.02065704  | -4.292815335 |
| ADD2           | -2.102299079 | 3.834097991  | -6.429010142 | 1.95E-10    | 3.61E-09    | 13.23061454  | -4.29393121  |
| RP11-353N4.5   | -2.102976708 | -2.893858412 | -5.734347095 | 1.28E-08    | 1.35E-07    | 9.197745102  | -4.29594853  |
| CCDC8          | -2.104824158 | -3.360265797 | -5.324907483 | 1.24E-07    | 9.58E-07    | 7.023283489  | -4.301453249 |
| NUP62CL        | -2.105736259 | -1.8108107   | -5.668719959 | 1.86E-08    | 1.86E-07    | 8.839015881  | -4.304173576 |
| APBB1          | -2.109583265 | 2.701800623  | -8.184366593 | 7.93E-16    | 7.86E-14    | 25.28175653  | -4.31566615  |
| GNG11          | -2.114566838 | -1.503652145 | -5.721727211 | 1.38E-08    | 1.44E-07    | 9.128461679  | -4.330599747 |
| AMIGO2         | -2.115710915 | 1.140378691  | -9.183511074 | 2.19E-19    | 5.27E-17    | 33.27520228  | -4.334035332 |
| MPPED2         | -2.118050506 | -2.486707711 | -4.891731779 | 1.16E-06    | 6.78E-06    | 4.889027446  | -4.341069458 |
| SPRY4          | -2.118483196 | -1.746044998 | -5.708452258 | 1.49E-08    | 1.53E-07    | 9.055736509  | -4.342371617 |
| DCHS1          | -2.118617741 | 4.242005577  | -7.516812378 | 1.21E-13    | 6.37E-12    | 20.39205545  | -4.342776603 |
| S1PR1          | -2.118844005 | 3.337671721  | -8.172519021 | 8.69E-16    | 8.48E-14    | 25.19177659  | -4.343457754 |
| FAT1           | -2.128220379 | -0.230966222 | -4.450886478 | 9.47E-06    | 4.20E-05    | 2.894727319  | -4.371778717 |
| RP11-588H23.3  | -2.128391489 | -2.003074493 | -4.625024371 | 4.22E-06    | 2.08E-05    | 3.660929407  | -4.372297261 |
| FLT4           | -2.128573727 | 0.742543349  | -4.954643546 | 8.45E-07    | 5.12E-06    | 5.188299251  | -4.372849594 |
| DNAJB5         | -2.128666447 | 0.37590087   | -7.474802085 | 1.64E-13    | 8.25E-12    | 20.09674212  | -4.37313064  |
| IRX5           | -2.130155918 | -0.98985975  | -4.844049357 | 1.46E-06    | 8.29E-06    | 4.664634059  | -4.377647889 |
| SNORD116-13    | -2.130714517 | -1.779282921 | -9.071134292 | 5.73E-19    | 1.24E-16    | 32.33677641  | -4.379343207 |
| SLITRK5        | -2.136735069 | -2.876655169 | -4.698103277 | 2.98E-06    | 1.53E-05    | 3.990877734  | -4.397656954 |
| ABP1           | -2.137228475 | -1.174825968 | -5.620579415 | 2.44E-08    | 2.36E-07    | 8.578338169  | -4.399161222 |
| GRASP          | -2.141293337 | 4.901082573  | -8.382786251 | 1.66E-16    | 1.96E-14    | 26.80566527  | -4.411573548 |
| PDE4A          | -2.144398526 | 2.863835567  | -7.988965705 | 3.58E-15    | 3.03E-13    | 23.81238829  | -4.421079036 |
| FAM83F         | -2.14466135  | -0.307287312 | -6.989194681 | 4.93E-12    | 1.54E-10    | 16.79161     | -4.421884524 |
| RP11-616M22.5  | -2.148258874 | -2.641798575 | -4.611165291 | 4.50E-06    | 2.20E-05    | 3.598915842  | -4.432924753 |
| MCOLN2         | -2.15168228  | 0.922677683  | -5.944259394 | 3.78E-09    | 4.64E-08    | 10.37111972  | -4.443456239 |
| PRDM5          | -2.151904726 | -1.852825572 | -5.290906157 | 1.48E-07    | 1.13E-06    | 6.849548457  | -4.444141417 |
| GPR68          | -2.154121003 | -0.094745048 | -8.167758706 | 9.02E-16    | 8.72E-14    | 25.15565518  | -4.450973783 |
| ICOS           | -2.154712528 | 1.185664182  | -7.258460521 | 7.64E-13    | 3.08E-11    | 18.59953138  | -4.452799117 |
| RP11-578F21.10 | -2.155705001 | -2.259651878 | -3.567568026 | 0.000376694 | 0.001063042 | -0.553251397 | -4.455863384 |
| POU4F1         | -2.158831535 | -0.191634771 | -3.450736794 | 0.000581464 | 0.001554827 | -0.953924456 | -4.465530374 |
| RAB33A         | -2.159773818 | 1.398162046  | -9.776441569 | 1.17E-21    | 4.62E-19    | 38.38736065  | -4.468447946 |
| SEMA3F         | -2.161201664 | 1.679771391  | -6.862736135 | 1.16E-11    | 3.22E-10    | 15.96397554  | -4.472872592 |
| GRIK5          | -2.166675929 | 3.573856721  | -6.763005057 | 2.25E-11    | 5.54E-10    | 15.32099409  | -4.48987702  |
| ETNK2          | -2.168073801 | -0.767756307 | -7.98965589  | 3.57E-15    | 3.03E-13    | 23.81752322  | -4.494229509 |
| EDARADD        | -2.171208208 | -2.031748619 | -7.621709944 | 5.61E-14    | 3.29E-12    | 21.13590339  | -4.50400431  |
| FARP1          | -2.172655134 | -1.30814013  | -7.009193955 | 4.30E-12    | 1.37E-10    | 16.92375864  | -4.508523789 |
| TMEM151A       | -2.175629502 | -1.817558801 | -6.151735717 | 1.09E-09    | 1.57E-08    | 11.56953085  | -4.517828487 |

| gene          | logFC        | AveExpr      | t            | P.Value     | adj.P.Val   | B           | FoldChange   |
|---------------|--------------|--------------|--------------|-------------|-------------|-------------|--------------|
| CERS4         | -2.178022045 | 2.614014705  | -8.479168305 | 7.67E-17    | 9.89E-15    | 27.55738992 | -4.525327001 |
| KIF1A         | -2.179501708 | -2.89186986  | -6.224090503 | 7.01E-10    | 1.08E-08    | 11.99644805 | -4.529970665 |
| HMX3          | -2.180006613 | -2.973284695 | -3.749925575 | 0.000186619 | 0.000572602 | 0.098131466 | -4.531556312 |
| DOK7          | -2.182173525 | -2.331472535 | -7.941736846 | 5.14E-15    | 4.17E-13    | 23.4619398  | -4.538367773 |
| CTC-260F20.7  | -2.183367727 | -0.808213878 | -7.503475107 | 1.33E-13    | 6.90E-12    | 20.29813975 | -4.542125999 |
| GALNT5        | -2.18663758  | -2.477189769 | -5.857104213 | 6.31E-09    | 7.21E-08    | 9.879145325 | -4.552432355 |
| HIST1H2BM     | -2.186650679 | 2.570208481  | -9.188232224 | 2.10E-19    | 5.12E-17    | 33.31484198 | -4.552473689 |
| AP000688.8    | -2.189169998 | -2.810713399 | -4.844715051 | 1.46E-06    | 8.28E-06    | 4.667752362 | -4.56043043  |
| NIPAL4        | -2.191239769 | -0.435088634 | -7.117211324 | 2.05E-12    | 7.00E-11    | 17.64342641 | -4.566977774 |
| SYDE2         | -2.20293039  | -0.658620332 | -6.078428959 | 1.70E-09    | 2.30E-08    | 11.14172842 | -4.604135812 |
| RP11-23P13.6  | -2.20369917  | -0.249193329 | -8.122751584 | 1.28E-15    | 1.19E-13    | 24.81505382 | -4.606589907 |
| HMGA2         | -2.204542591 | -2.005268384 | -4.798124923 | 1.83E-06    | 1.01E-05    | 4.45049948  | -4.609283775 |
| KCNIP3        | -2.211606841 | -1.955407525 | -6.471701838 | 1.49E-10    | 2.81E-09    | 13.49237979 | -4.631908779 |
| GATA3         | -2.212496159 | 1.506473647  | -8.197858422 | 7.13E-16    | 7.14E-14    | 25.38436358 | -4.634764898 |
| NMT2          | -2.213861073 | 2.681208809  | -10.08372717 | 7.02E-23    | 3.38E-20    | 41.14113723 | -4.639151861 |
| SDK1          | -2.215899663 | -0.482915005 | -6.69888059  | 3.43E-11    | 7.90E-10    | 14.91212297 | -4.645711814 |
| SH2D5         | -2.216748521 | -0.786925259 | -7.51269896  | 1.24E-13    | 6.54E-12    | 20.36307448 | -4.648446079 |
| CA8           | -2.221393639 | 0.16292943   | -6.220464394 | 7.17E-10    | 1.10E-08    | 11.97494255 | -4.663437035 |
| SPTBN2        | -2.223990804 | 0.49110791   | -6.782638168 | 1.97E-11    | 4.97E-10    | 15.44689163 | -4.671839799 |
| HBM           | -2.225194163 | 3.235989305  | -5.121308373 | 3.61E-07    | 2.45E-06    | 5.998726654 | -4.67573823  |
| ACVR2B        | -2.226413582 | 0.946406475  | -8.979163086 | 1.25E-18    | 2.30E-16    | 31.57607877 | -4.679692006 |
| TINAGL1       | -2.229068127 | -1.441183818 | -5.790658393 | 9.27E-09    | 1.02E-07    | 9.508639265 | -4.68831052  |
| PDE2A         | -2.229266335 | 1.900959141  | -9.236689455 | 1.39E-19    | 3.46E-17    | 33.72269651 | -4.688954681 |
| SNRPN         | -2.231557817 | 4.905754296  | -9.268632752 | 1.05E-19    | 2.76E-17    | 33.99254994 | -4.696408223 |
| AC138649.1    | -2.231579097 | -3.24294562  | -4.558809524 | 5.75E-06    | 2.72E-05    | 3.36625792  | -4.6964775   |
| SPRED1        | -2.233392696 | 0.032754402  | -5.80707163  | 8.44E-09    | 9.35E-08    | 9.599792398 | -4.702385109 |
| PNMT          | -2.237165147 | -0.968767821 | -7.401405578 | 2.77E-13    | 1.30E-11    | 19.58436305 | -4.714697299 |
| AP001046.5    | -2.240062196 | -0.710823511 | -9.406256727 | 3.17E-20    | 9.61E-18    | 35.16417259 | -4.724174305 |
| AC002398.5    | -2.240388442 | -3.057144448 | -6.25935012  | 5.64E-10    | 8.96E-09    | 12.20616927 | -4.725242734 |
| HHIPL1        | -2.240655348 | -2.456357183 | -6.185365465 | 8.89E-10    | 1.32E-08    | 11.76738114 | -4.726117008 |
| ZFYVE9        | -2.243935741 | 1.53877683   | -6.815938917 | 1.58E-11    | 4.19E-10    | 15.66119589 | -4.736875459 |
| SNORD116-20   | -2.245743231 | -0.353953694 | -7.511272159 | 1.26E-13    | 6.59E-12    | 20.35302531 | -4.742813802 |
| TUBB3         | -2.247027765 | 0.320787712  | -7.398221853 | 2.83E-13    | 1.33E-11    | 19.56224035 | -4.747038546 |
| HBA1          | -2.247135866 | 5.335611287  | -4.992074436 | 7.00E-07    | 4.34E-06    | 5.36808825  | -4.747394255 |
| LPIN3         | -2.252024098 | -2.187886039 | -5.794249248 | 9.08E-09    | 9.97E-08    | 9.528560911 | -4.763506964 |
| HIST1H2BB     | -2.252547946 | 4.105907237  | -10.53652841 | 9.76E-25    | 5.83E-22    | 45.32559623 | -4.765236924 |
| SNURF         | -2.254515133 | 5.514508373  | -9.399536271 | 3.36E-20    | 1.00E-17    | 35.10662195 | -4.771738995 |
| SNORD116-18   | -2.257639919 | -0.642287045 | -8.28999764  | 3.46E-16    | 3.76E-14    | 26.08905248 | -4.782085482 |
| GRAMD3        | -2.258894816 | 1.890767727  | -12.36020976 | 7.57E-33    | 1.25E-29    | 63.6286401  | -4.786246886 |
| PTGER3        | -2.261404653 | -0.778024233 | -6.273173733 | 5.18E-10    | 8.29E-09    | 12.28869054 | -4.794580701 |
| FUT3          | -2.261872495 | -1.072084168 | -5.698067054 | 1.58E-08    | 1.61E-07    | 8.998953011 | -4.796135755 |
| CRISP3        | -2.265667602 | 0.958387635  | -4.548803344 | 6.03E-06    | 2.83E-05    | 3.322082964 | -4.808768925 |
| MATN2         | -2.266159153 | -0.269549504 | -6.777813927 | 2.04E-11    | 5.11E-10    | 15.4159252  | -4.810407632 |
| BEX2          | -2.26659825  | 0.42711421   | -7.164165397 | 1.48E-12    | 5.31E-11    | 17.95936895 | -4.811871948 |
| TNFSF9        | -2.272172231 | 2.8612829    | -8.151885966 | 1.02E-15    | 9.73E-14    | 25.03534593 | -4.830499004 |
| ALOX12        | -2.272450775 | -1.325215155 | -5.571616475 | 3.21E-08    | 2.99E-07    | 8.315352462 | -4.831431727 |
| SIAH3         | -2.278008262 | -2.732877406 | -5.880540222 | 5.50E-09    | 6.39E-08    | 10.01076945 | -4.850079051 |
| GNAT1         | -2.282690729 | -2.757026407 | -6.010269414 | 2.56E-09    | 3.28E-08    | 10.74824754 | -4.86584623  |
| TSPYL5        | -2.284110943 | 0.558746772  | -5.978984697 | 3.08E-09    | 3.88E-08    | 10.56902766 | -4.870638611 |
| LRRC2         | -2.288393072 | -1.236484627 | -7.212305242 | 1.06E-12    | 4.01E-11    | 18.28524148 | -4.885116852 |
| STAP2         | -2.290942303 | -1.481802607 | -8.945700384 | 1.65E-18    | 2.97E-16    | 31.30095052 | -4.893756446 |
| PPP1R3G       | -2.295588756 | -0.746260959 | -5.897682248 | 4.98E-09    | 5.88E-08    | 10.10735572 | -4.909543057 |
| IFIT1B        | -2.297290903 | 1.801683936  | -4.817393328 | 1.67E-06    | 9.29E-06    | 4.540106002 | -4.915338945 |
| PPP1R9A       | -2.301142897 | -1.074665726 | -5.452515054 | 6.20E-08    | 5.29E-07    | 7.684697298 | -4.928480429 |
| NRP1          | -2.30510816  | 0.593672891  | -5.677942389 | 1.77E-08    | 1.79E-07    | 8.889193127 | -4.942045043 |
| ZNF626        | -2.310259142 | 0.13801678   | -7.65971064  | 4.24E-14    | 2.58E-12    | 21.40764553 | -4.959721604 |
| SNHG14        | -2.319626907 | 4.904501344  | -9.048224655 | 6.96E-19    | 1.44E-16    | 32.14667157 | -4.992031047 |
| XIRP1         | -2.324723497 | -1.721750479 | -5.486120627 | 5.16E-08    | 4.51E-07    | 7.861341276 | -5.009697516 |
| ZNF595        | -2.327011108 | 1.359595595  | -6.385400198 | 2.57E-10    | 4.58E-09    | 12.96487011 | -5.017647452 |
| EDIL3         | -2.333560809 | -1.754003826 | -4.697332953 | 2.99E-06    | 1.53E-05    | 3.987373902 | -5.040478889 |
| RP11-701H24.2 | -2.336132878 | 2.152621846  | -8.020207558 | 2.82E-15    | 2.45E-13    | 24.04521803 | -5.049473183 |

| gene           | logFC        | AveExpr      | t            | P.Value  | adj.P.Val   | B           | FoldChange   |
|----------------|--------------|--------------|--------------|----------|-------------|-------------|--------------|
| PLEKHA8        | -2.336908611 | 2.166705106  | -8.078386262 | 1.80E-15 | 1.65E-13    | 24.48092978 | -5.052189001 |
| VASN           | -2.341573878 | -0.644825441 | -8.006676026 | 3.13E-15 | 2.70E-13    | 23.94427589 | -5.068552794 |
| CAV2           | -2.346620576 | -1.225271408 | -5.744481413 | 1.21E-08 | 1.28E-07    | 9.253486368 | -5.086314169 |
| CACNA2D2       | -2.3505406   | 0.637017533  | -6.78578327  | 1.93E-11 | 4.90E-10    | 15.46709065 | -5.100153259 |
| RP11-578F21.12 | -2.357254495 | 0.853336953  | -4.036445207 | 5.82E-05 | 0.000206211 | 1.185303123 | -5.12394324  |
| NID1           | -2.36344929  | 3.578573931  | -5.488471439 | 5.09E-08 | 4.46E-07    | 7.87373637  | -5.145992272 |
| LA16c-349E10.1 | -2.365931139 | -0.995428291 | -7.09583812  | 2.37E-12 | 7.99E-11    | 17.50023478 | -5.154852472 |
| CLGN           | -2.367885349 | -2.00635217  | -6.334544926 | 3.53E-10 | 6.03E-09    | 12.65708614 | -5.161839736 |
| RPL39L         | -2.3699089   | -1.48404062  | -7.642027548 | 4.83E-14 | 2.86E-12    | 21.28104406 | -5.169084907 |
| NPTX1          | -2.371514244 | -2.038187131 | -6.373838797 | 2.76E-10 | 4.88E-09    | 12.89469896 | -5.174839952 |
| TUSC1          | -2.372081644 | -2.182425363 | -5.70675234  | 1.50E-08 | 1.54E-07    | 9.046435169 | -5.176875575 |
| SHD            | -2.375605761 | -1.104711829 | -5.492509732 | 4.98E-08 | 4.37E-07    | 7.895040725 | -5.189536751 |
| MLF1           | -2.379450383 | -0.606269022 | -8.045438129 | 2.32E-15 | 2.06E-13    | 24.23383383 | -5.203384736 |
| AC005082.12    | -2.382102241 | -1.944654347 | -6.385906898 | 2.56E-10 | 4.56E-09    | 12.96794818 | -5.212958018 |
| FRMD4A         | -2.38446923  | 2.084946716  | -7.147869983 | 1.66E-12 | 5.85E-11    | 17.84950795 | -5.221517789 |
| TUBB2A         | -2.385171519 | 2.000190321  | -8.797859979 | 5.69E-18 | 8.90E-16    | 30.09595795 | -5.224060189 |
| SHISA7         | -2.386123942 | -1.016558975 | -6.858608464 | 1.19E-11 | 3.29E-10    | 15.93719332 | -5.227510093 |
| RP11-455B2.8   | -2.39173489  | -1.59568872  | -9.241573982 | 1.33E-19 | 3.40E-17    | 33.76390939 | -5.247880578 |
| DLG3           | -2.399515618 | 0.431951063  | -8.9408508   | 1.72E-18 | 3.03E-16    | 31.26115044 | -5.276259851 |
| ALAS2          | -2.400496468 | 5.92293683   | -5.283111782 | 1.55E-07 | 1.17E-06    | 6.809870379 | -5.279848259 |
| RYR3           | -2.403022798 | 0.560432026  | -5.086153425 | 4.33E-07 | 2.87E-06    | 5.825658794 | -5.289102    |
| HIST1H3E       | -2.406080547 | -0.317018762 | -8.397229595 | 1.48E-16 | 1.80E-14    | 26.91783818 | -5.300323982 |
| VANGL2         | -2.40692094  | 0.428782759  | -6.690154918 | 3.63E-11 | 8.33E-10    | 14.85676207 | -5.303412404 |
| RAB11FIP5      | -2.411029657 | 1.312678638  | -7.492325186 | 1.44E-13 | 7.40E-12    | 20.21974122 | -5.318537764 |
| TFCP2L1        | -2.411226964 | -0.301523349 | -7.03777308  | 3.54E-12 | 1.14E-10    | 17.11319558 | -5.319265192 |
| OTOF           | -2.412729207 | -1.099249498 | -5.38935114  | 8.74E-08 | 7.09E-07    | 7.355456779 | -5.324806896 |
| HBA2           | -2.41459892  | 5.370517884  | -5.355189531 | 1.05E-07 | 8.31E-07    | 7.178900897 | -5.331712245 |
| CACNA1H        | -2.415400006 | -0.259629178 | -7.200126771 | 1.15E-12 | 4.29E-11    | 18.20261544 | -5.33467361  |
| RP11-1134I14.2 | -2.418009411 | -1.583987816 | -4.303844422 | 1.84E-05 | 7.51E-05    | 2.269788321 | -5.344331174 |
| THNSL2         | -2.418880242 | -0.899951234 | -5.858096725 | 6.27E-09 | 7.17E-08    | 9.884709621 | -5.347558061 |
| SCML1          | -2.421307046 | 1.98973646   | -8.27831395  | 3.80E-16 | 4.05E-14    | 25.99931282 | -5.356560934 |
| CALN1          | -2.422722069 | 0.775312246  | -6.133340505 | 1.22E-09 | 1.73E-08    | 11.46173227 | -5.361817329 |
| PCLO           | -2.427330605 | -2.969409959 | -5.02612826  | 5.89E-07 | 3.76E-06    | 5.532776235 | -5.378972471 |
| ABCA11P        | -2.430958179 | 1.340400173  | -12.06633698 | 1.79E-31 | 2.20E-28    | 60.52877588 | -5.392514604 |
| GPR173         | -2.431194663 | -2.415833705 | -5.952984696 | 3.59E-09 | 4.43E-08    | 10.42074613 | -5.393398609 |
| Z95704.2       | -2.43215989  | -0.471823562 | -6.566623241 | 8.11E-11 | 1.68E-09    | 14.08011035 | -5.397008241 |
| MEIS2          | -2.433537392 | -2.049238871 | -5.580804056 | 3.05E-08 | 2.86E-07    | 8.364535001 | -5.402163829 |
| ZNF205         | -2.434157317 | -2.69408454  | -6.233052134 | 6.63E-10 | 1.03E-08    | 12.04964696 | -5.404485631 |
| NEDD4L         | -2.43476773  | 2.465725212  | -9.064157855 | 6.08E-19 | 1.29E-16    | 32.27884235 | -5.406772785 |
| RASD2          | -2.442391609 | -2.231535359 | -7.346966668 | 4.09E-13 | 1.80E-11    | 19.20726266 | -5.435420344 |
| TOX2           | -2.442809703 | -0.634486807 | -7.691474578 | 3.36E-14 | 2.14E-12    | 21.63571364 | -5.436995759 |
| ZNF827         | -2.444232695 | 4.406455647  | -8.982361783 | 1.21E-18 | 2.28E-16    | 31.60242423 | -5.442361146 |
| INPP5J         | -2.444624881 | -2.136111485 | -6.387217739 | 2.54E-10 | 4.53E-09    | 12.97591224 | -5.443840815 |
| ZNF462         | -2.446396851 | -0.562377981 | -7.05486555  | 3.15E-12 | 1.03E-10    | 17.22682766 | -5.450531242 |
| AC011385.1     | -2.452369131 | -1.818653023 | -7.834183936 | 1.16E-14 | 8.53E-13    | 22.67074007 | -5.473141407 |
| PARD3          | -2.453897931 | -0.014329855 | -7.837307645 | 1.13E-14 | 8.36E-13    | 22.69358439 | -5.478944278 |
| SCRN1          | -2.456061833 | 3.435883111  | -6.863136202 | 1.15E-11 | 3.22E-10    | 15.96657214 | -5.487168325 |
| TMEM117        | -2.462131067 | -0.584488628 | -8.524763358 | 5.31E-17 | 7.08E-15    | 27.91560822 | -5.510300768 |
| PPAPDC3        | -2.467867096 | -1.237436249 | -6.76522348  | 2.22E-11 | 5.47E-10    | 15.33520302 | -5.532252851 |
| SLC41A1        | -2.471395011 | 3.296909052  | -11.16695385 | 1.99E-27 | 1.70E-24    | 51.39597612 | -5.545797778 |
| DACT3          | -2.475018457 | -0.238248877 | -7.358003002 | 3.78E-13 | 1.69E-11    | 19.28350933 | -5.559744008 |
| FBN2           | -2.486121341 | 2.712622163  | -5.615097463 | 2.52E-08 | 2.42E-07    | 8.548786351 | -5.60269649  |
| GOLM1          | -2.488189806 | 1.256409639  | -8.536854498 | 4.82E-17 | 6.51E-15    | 28.01088224 | -5.610735121 |
| PKLR           | -2.507763019 | 0.331355426  | -6.793894561 | 1.83E-11 | 4.68E-10    | 15.5192239  | -5.687375341 |
| SNORD116-19    | -2.508138468 | -0.368801414 | -9.237577494 | 1.37E-19 | 3.46E-17    | 33.73018791 | -5.688855626 |
| ZNF703         | -2.512865188 | 1.225291453  | -7.654339663 | 4.42E-14 | 2.65E-12    | 21.3691646  | -5.707524661 |
| FKBP14         | -2.513767933 | 3.039375272  | -7.936874833 | 5.33E-15 | 4.31E-13    | 23.42596689 | -5.711097176 |
| FAM64A         | -2.514733671 | -0.926412102 | -7.219922034 | 1.00E-12 | 3.84E-11    | 18.33698252 | -5.714921458 |
| PARD3B         | -2.520925152 | -1.60507035  | -5.623227513 | 2.41E-08 | 2.33E-07    | 8.592623112 | -5.739500361 |
| PTPN13         | -2.527680699 | 0.497412828  | -8.102600263 | 1.50E-15 | 1.39E-13    | 24.66309061 | -5.766439101 |
| ZNF90          | -2.528576468 | 0.072515885  | -7.330433545 | 4.60E-13 | 2.00E-11    | 19.09323316 | -5.770020595 |

| gene          | logFC        | AveExpr      | t            | P.Value  | adj.P.Val   | B           | FoldChange   |
|---------------|--------------|--------------|--------------|----------|-------------|-------------|--------------|
| PXDC1         | -2.530526428 | -0.670245716 | -8.854595528 | 3.55E-18 | 5.73E-16    | 30.55635123 | -5.777824679 |
| NBL1          | -2.544177595 | 1.764687782  | -8.296881615 | 3.28E-16 | 3.59E-14    | 26.14197849 | -5.832755481 |
| DCBLD2        | -2.546494115 | 0.914999677  | -7.725753139 | 2.60E-14 | 1.72E-12    | 21.8827804  | -5.842128596 |
| RCOR2         | -2.5507238   | -1.132046407 | -7.518488232 | 1.19E-13 | 6.36E-12    | 20.40386671 | -5.859281649 |
| ADAM23        | -2.556158471 | -1.269384953 | -5.089824837 | 4.25E-07 | 2.82E-06    | 5.843680159 | -5.881395342 |
| UNC5C         | -2.559688198 | -2.142764627 | -4.325921974 | 1.66E-05 | 6.89E-05    | 2.3623285   | -5.895802505 |
| RP11-255H23.2 | -2.571966473 | -0.482745742 | -7.137543235 | 1.78E-12 | 6.18E-11    | 17.78000395 | -5.946193753 |
| CTC-250P20.2  | -2.572121911 | -0.24446769  | -9.687950644 | 2.60E-21 | 9.68E-19    | 37.6074342  | -5.946834438 |
| SMPDL3A       | -2.572905462 | -0.938052668 | -6.668268895 | 4.19E-11 | 9.44E-10    | 14.71819509 | -5.950065138 |
| GIPR          | -2.575587841 | 0.52072476   | -7.799459622 | 1.50E-14 | 1.07E-12    | 22.41733856 | -5.961138286 |
| FLNC          | -2.576906485 | -1.012862131 | -6.978547267 | 5.30E-12 | 1.63E-10    | 16.72139545 | -5.966589341 |
| TPTEP1        | -2.583642347 | 0.036676673  | -6.963432788 | 5.87E-12 | 1.78E-10    | 16.62188999 | -5.994512148 |
| AR            | -2.58523919  | -0.295294476 | -5.291083238 | 1.48E-07 | 1.13E-06    | 6.85045055  | -6.001150828 |
| HIST1H1A      | -2.585415465 | -0.385740776 | -9.704982874 | 2.23E-21 | 8.60E-19    | 37.75709168 | -6.00188412  |
| TMEM176A      | -2.596129998 | -0.054816111 | -6.507253567 | 1.19E-10 | 2.31E-09    | 13.7115846  | -6.046624536 |
| RNF217        | -2.598985538 | 2.803948334  | -5.992608873 | 2.84E-09 | 3.60E-08    | 10.64696888 | -6.05860453  |
| NFIA          | -2.606970509 | 1.887566313  | -7.785648358 | 1.67E-14 | 1.16E-12    | 22.31682847 | -6.092230422 |
| NRSN2         | -2.60774878  | 0.95705397   | -11.2838862  | 6.10E-28 | 5.47E-25    | 52.55244149 | -6.0955178   |
| GPR12         | -2.620262807 | -2.440777722 | -5.728120392 | 1.33E-08 | 1.39E-07    | 9.163542476 | -6.148620682 |
| MECOM         | -2.621362648 | -2.226408974 | -4.394578348 | 1.22E-05 | 5.26E-05    | 2.653024577 | -6.153309878 |
| AC092574.2    | -2.623135181 | -0.991370211 | -12.75363473 | 1.01E-34 | 2.49E-31    | 67.86465046 | -6.160874645 |
| RASAL1        | -2.623178583 | -0.431124378 | -5.823851953 | 7.65E-09 | 8.59E-08    | 9.693233961 | -6.161059988 |
| HHIP          | -2.65399007  | -2.194123283 | -6.258073514 | 5.68E-10 | 9.01E-09    | 12.19855697 | -6.294056239 |
| SLAIN1        | -2.655284065 | 2.12638374   | -9.813073239 | 8.41E-22 | 3.46E-19    | 38.71194123 | -6.299704094 |
| SLC35G1       | -2.663730333 | -0.884289863 | -7.75439998  | 2.10E-14 | 1.43E-12    | 22.09000604 | -6.336693929 |
| GPC4          | -2.667470687 | -1.69170892  | -5.551105831 | 3.60E-08 | 3.30E-07    | 8.205831141 | -6.353143858 |
| SNORD116-21   | -2.66956936  | 0.06523754   | -7.815305293 | 1.33E-14 | 9.61E-13    | 22.53284875 | -6.362392433 |
| COL2A1        | -2.673278426 | -1.324493449 | -7.537635775 | 1.04E-13 | 5.65E-12    | 20.53898413 | -6.378770733 |
| DUSP8         | -2.674686692 | 3.439986463  | -7.662097569 | 4.17E-14 | 2.56E-12    | 21.42475466 | -6.38500032  |
| CTC-774J1.2   | -2.678195088 | -2.534408486 | -6.09239305  | 1.56E-09 | 2.14E-08    | 11.22285207 | -6.400546478 |
| ROBO1         | -2.687737328 | 0.182437617  | -5.388037207 | 8.81E-08 | 7.12E-07    | 7.348646412 | -6.443021138 |
| IGSF1         | -2.695542405 | -3.083057189 | -4.748865897 | 2.33E-06 | 1.24E-05    | 4.222985155 | -6.477972775 |
| UGGT2         | -2.703855069 | 0.419372454  | -5.41668169  | 7.54E-08 | 6.24E-07    | 7.497471947 | -6.515405945 |
| BCL6B         | -2.706505896 | -0.198055746 | -7.929471245 | 5.64E-15 | 4.53E-13    | 23.3712269  | -6.527388441 |
| HIST3H2BB     | -2.708308882 | 0.295809073  | -7.754148457 | 2.11E-14 | 1.43E-12    | 22.0881836  | -6.535551045 |
| DUSP4         | -2.714685197 | 1.698065239  | -8.490266425 | 7.02E-17 | 9.23E-15    | 27.6444288  | -6.564500309 |
| SLC18A2       | -2.722803316 | 0.243964785  | -6.266880728 | 5.38E-10 | 8.59E-09    | 12.25110298 | -6.601543214 |
| RP11-701H24.4 | -2.734905267 | 4.144494275  | -7.661850786 | 4.18E-14 | 2.56E-12    | 21.42298553 | -6.657152728 |
| ARC           | -2.744142292 | 0.826684641  | -7.30565331  | 5.48E-13 | 2.33E-11    | 18.92275647 | -6.699912676 |
| HBB           | -2.74827662  | 10.51531715  | -6.135148276 | 1.21E-09 | 1.72E-08    | 11.47231277 | -6.719140136 |
| CTC-497E21.4  | -2.764881406 | -1.322318895 | -4.9322881   | 9.45E-07 | 5.66E-06    | 5.081536369 | -6.796921243 |
| DSG2          | -2.778767523 | -1.793593766 | -6.003955749 | 2.66E-09 | 3.39E-08    | 10.71200839 | -6.862658298 |
| PBX1          | -2.784920546 | 1.005354967  | -6.10129266  | 1.48E-09 | 2.05E-08    | 11.27464424 | -6.891989702 |
| PMP22         | -2.786442218 | -0.438080769 | -7.858035549 | 9.68E-15 | 7.26E-13    | 22.84537643 | -6.899262811 |
| DES           | -2.790717374 | -2.656103914 | -6.840052524 | 1.35E-11 | 3.63E-10    | 15.81697556 | -6.919737806 |
| RUNX1T1       | -2.806228397 | -1.757683761 | -4.200972862 | 2.89E-05 | 0.000111418 | 1.84461939  | -6.994536199 |
| CAV1          | -2.811267779 | -0.464539047 | -6.290346085 | 4.65E-10 | 7.63E-09    | 12.39143724 | -7.019011071 |
| HIST1H4F      | -2.834372109 | 4.320508902  | -10.76308119 | 1.09E-25 | 7.15E-23    | 47.4747742  | -7.132323346 |
| USP2          | -2.834967606 | -0.082434941 | -8.474065551 | 7.99E-17 | 1.02E-14    | 27.51740392 | -7.13526794  |
| WDFY3         | -2.843721762 | 5.468556112  | -9.307839004 | 7.48E-20 | 1.99E-17    | 34.32483655 | -7.178695791 |
| RAB3IL1       | -2.853412932 | 0.58406009   | -9.033059677 | 7.91E-19 | 1.61E-16    | 32.02105758 | -7.227080337 |
| MEG3          | -2.853937405 | -0.388741281 | -5.669499994 | 1.85E-08 | 1.85E-07    | 8.843256918 | -7.229708126 |
| DPPA4         | -2.895972824 | -0.966682993 | -6.368977649 | 2.85E-10 | 5.00E-09    | 12.86522963 | -7.443457049 |
| ZNF711        | -2.920713422 | 1.379839445  | -6.217890535 | 7.28E-10 | 1.12E-08    | 11.95968473 | -7.57220475  |
| KRT1          | -2.921325146 | -0.048165786 | -6.81972957  | 1.54E-11 | 4.10E-10    | 15.68565113 | -7.575416162 |
| MMP14         | -2.93136182  | 3.237175183  | -9.013416738 | 9.34E-19 | 1.84E-16    | 31.85861909 | -7.628301259 |
| CADM1         | -2.942117466 | -0.932994914 | -5.816889853 | 7.97E-09 | 8.90E-08    | 9.654434725 | -7.685384642 |
| MCAM          | -2.959961158 | 0.820273656  | -9.068630315 | 5.85E-19 | 1.25E-16    | 32.3159784  | -7.781030088 |
| HMGB1P41      | -2.966386005 | -2.561561852 | -8.907381944 | 2.28E-18 | 3.91E-16    | 30.98697847 | -7.815759124 |
| TSPAN7        | -2.977655242 | 0.843827607  | -7.069210425 | 2.85E-12 | 9.45E-11    | 17.32238659 | -7.877048954 |
| SGPP1         | -2.979763585 | 2.811609662  | -10.73150155 | 1.48E-25 | 9.41E-23    | 47.17300274 | -7.888568824 |

| gene          | logFC        | AveExpr      | t            | P.Value  | adj.P.Val | B           | FoldChange   |
|---------------|--------------|--------------|--------------|----------|-----------|-------------|--------------|
| RP5-972B16.2  | -2.990517565 | -0.137832544 | -7.697252678 | 3.22E-14 | 2.07E-12  | 21.67729138 | -7.947590639 |
| DDIT4L        | -2.99067685  | -1.483983762 | -5.569146818 | 3.26E-08 | 3.02E-07  | 8.302145019 | -7.948468166 |
| IRX1          | -2.994045852 | -2.448166576 | -5.137422185 | 3.32E-07 | 2.28E-06  | 6.078433623 | -7.967051233 |
| TMEM176B      | -3.00413763  | 0.760339378  | -7.234253543 | 9.06E-13 | 3.54E-11  | 18.43447051 | -8.022976828 |
| PXDN          | -3.007802935 | 0.563667774  | -5.419278679 | 7.43E-08 | 6.17E-07  | 7.511001744 | -8.043385879 |
| LRP6          | -3.010744805 | 1.925142179  | -7.950305802 | 4.81E-15 | 3.92E-13  | 23.52538693 | -8.059804275 |
| HIST3H2A      | -3.035632497 | 0.097274306  | -7.906979675 | 6.69E-15 | 5.19E-13  | 23.20520804 | -8.200048806 |
| RP11-401F24.4 | -3.038516296 | -0.396815162 | -5.776124343 | 1.01E-08 | 1.09E-07  | 9.428124263 | -8.216456254 |
| RP11-26F2.1   | -3.040924345 | -2.250105506 | -4.497306346 | 7.65E-06 | 3.49E-05  | 3.096211056 | -8.23018206  |
| PRSS21        | -3.045702653 | 0.962383356  | -5.079792555 | 4.47E-07 | 2.96E-06  | 5.794465325 | -8.257486195 |
| ADAMTS7       | -3.075867525 | 0.273602004  | -8.75592949  | 8.04E-18 | 1.22E-15  | 29.75733945 | -8.431957087 |
| PON2          | -3.103766044 | 2.204913981  | -9.21834713  | 1.62E-19 | 4.00E-17  | 33.56809913 | -8.596599196 |
| CD70          | -3.121455365 | -0.199616865 | -8.315010914 | 2.84E-16 | 3.18E-14  | 26.28154562 | -8.702653555 |
| FGD5          | -3.218871963 | -0.508251945 | -6.993964368 | 4.77E-12 | 1.50E-10  | 16.82309536 | -9.310585941 |
| FAM213A       | -3.235387684 | 0.009717698  | -9.150000573 | 2.92E-19 | 6.78E-17  | 32.99433851 | -9.417784325 |
| THSD7A        | -3.241125816 | -0.654089714 | -5.719348148 | 1.40E-08 | 1.45E-07  | 9.115416623 | -9.455316927 |
| AXL           | -3.261153432 | -0.118544227 | -8.099895252 | 1.53E-15 | 1.41E-13  | 24.64271713 | -9.587491757 |
| KIRREL        | -3.362850493 | -0.229263368 | -7.207332216 | 1.09E-12 | 4.11E-11  | 18.25148625 | -10.28771369 |
| NCAM1         | -3.37256385  | 1.472017236  | -6.784933576 | 1.94E-11 | 4.92E-10  | 15.46163276 | -10.35721236 |
| FAM171A1      | -3.386984348 | 0.028062343  | -7.66786285  | 4.00E-14 | 2.48E-12  | 21.46609889 | -10.46125729 |
| HPGD          | -3.401715191 | 0.971765091  | -9.433975492 | 2.48E-20 | 7.78E-18  | 35.40190792 | -10.56862064 |
| C15orf38      | -3.416650982 | -0.038800875 | -8.915082657 | 2.14E-18 | 3.70E-16  | 31.04998359 | -10.67860274 |
| MYEF2         | -3.435249903 | 2.673783384  | -9.656208267 | 3.46E-21 | 1.22E-18  | 37.32910705 | -10.81716024 |
| AADAT         | -3.451273227 | -1.64920883  | -7.92935523  | 5.64E-15 | 4.53E-13  | 23.37036949 | -10.93797092 |
| MYO18B        | -3.463015211 | 1.249816478  | -5.630952678 | 2.30E-08 | 2.25E-07  | 8.634332016 | -11.02735749 |
| MSLN          | -3.534447005 | 0.984361897  | -5.774123993 | 1.02E-08 | 1.10E-07  | 9.41705767  | -11.58709497 |
| LAMB2         | -3.554942884 | 2.513475758  | -7.437062309 | 2.15E-13 | 1.04E-11  | 19.83271472 | -11.75288377 |
| BMP3          | -3.558896928 | -1.930150812 | -6.940668284 | 6.85E-12 | 2.05E-10  | 16.47239155 | -11.78513948 |
| DSC2          | -3.579471507 | 0.925824947  | -7.448531175 | 1.98E-13 | 9.67E-12  | 19.91282401 | -11.95441401 |
| TRO           | -3.667417653 | -0.187051558 | -7.755959994 | 2.08E-14 | 1.42E-12  | 22.10131046 | -12.70582063 |
| APP           | -3.762203229 | 4.444063181  | -9.939953999 | 2.64E-22 | 1.16E-19  | 39.84394812 | -13.56863068 |
| ARPP21        | -3.928395836 | -1.078006318 | -7.234597766 | 9.04E-13 | 3.54E-11  | 18.43681418 | -15.22526924 |
| ST18          | -4.321279497 | 0.239574718  | -8.527532188 | 5.20E-17 | 6.97E-15  | 27.93741531 | -19.99101054 |
| ADAMTS3       | -4.665435485 | 0.500375837  | -10.3664354  | 4.95E-24 | 2.57E-21  | 43.73623037 | -25.37675131 |
| RPS6KL1       | -4.689494947 | 2.323430486  | -14.95184861 | 6.12E-46 | 4.02E-42  | 93.22202557 | -25.80350153 |
| PRAME         | -4.739643291 | 1.481751987  | -7.495817305 | 1.40E-13 | 7.24E-12  | 20.24428414 | -26.71620697 |
| ZNF704        | -4.810447069 | 2.327483353  | -12.23736135 | 2.86E-32 | 4.03E-29  | 62.32602933 | -28.06007713 |
| ZNF521        | -5.760202033 | 3.977043408  | -9.948621027 | 2.44E-22 | 1.09E-19  | 39.92171176 | -54.19928944 |

**Supplemental table 5. Overlapping differentially expressed genes between NUP98-KDM5A and NUP98-NSD1**

| Upregulated in both | Downregulated in both | Up in NUP98-KDM5A, down in NUP98-NSD1 | Down in NUP98-KDM5A, up in NUP98-NSD1 |
|---------------------|-----------------------|---------------------------------------|---------------------------------------|
| ABO                 | AC011484.1            | ABCB6                                 | AC025627.9                            |
| AC010745.4          | AC114730.3            | ABCG2                                 | AC068057.2                            |
| AC103702.1          | AC141928.1            | AC003102.1                            | AC093627.10                           |
| AL008733.1          | ADAMTS7               | AC003102.3                            | AC132807.1                            |
| ANKRD18DP           | AFAP1L1               | AC005082.12                           | ACY3                                  |
| ARHGAP22            | AGAP3                 | AC009237.1                            | AE000661.37                           |
| C10orf114           | ARC                   | AC009469.1                            | AGR2                                  |
| C20orf197           | C9orf118              | AC055876.1                            | AIF1L                                 |
| C3orf80             | COL6A1                | AC104820.2                            | AL163953.3                            |
| CACNG4              | CRIP2                 | AC138649.1                            | AMN                                   |
| CCDC113             | DFNB31                | ACTN2                                 | ANKRD63                               |
| CCDC162P            | DLGAP3                | ACTN3                                 | ANXA1                                 |
| CD36                | EPHB3                 | ACVR2B                                | AP003774.4                            |
| CDKN2C              | FHAD1                 | ACVR2B-AS1                            | AREG                                  |
| CEL                 | FLT4                  | ADAM32                                | ATP8B4                                |
| CNNM1               | GLIS2                 | AF131215.4                            | AZU1                                  |
| CTA-109P11.4        | HSPD1P11              | AGAP1                                 | B3GNTL1                               |
| CTD-2335A18.1       | KIF26B                | AKAP5                                 | BAALC                                 |
| FAM81B              | KIRREL                | AKR1C2                                | BIK                                   |
| FAM91A2             | MARC2                 | AKR1E2                                | C10orf11                              |
| FNBP1L              | MLNR                  | AL132709.8                            | C16orf74                              |
| H2AFY2              | NDRG2                 | ALDH1A1                               | C1orf126                              |
| HOXA10              | PAM                   | ALOX12                                | C1orf186                              |
| HOXA11-AS           | PLIN2                 | AMOTL1                                | C20orf166-AS1                         |
| HOXA3               | PTPN14                | ANK1                                  | C21orf128                             |
| HOXA6               | RARRES2               | ANKFN1                                | C8orf73                               |
| HOXA9               | RD3                   | ANKRD31                               | C9orf139                              |
| HOXA-AS3            | RGMA                  | ANKRD53                               | CACNB4                                |
| HOXA-AS4            | RP11-1134I14.2        | AP000688.8                            | CCDC73                                |
| HOXB2               | RP11-139K1.2          | AP001347.6                            | CCNA1                                 |
| HOXB3               | RP11-176D17.3         | APBA2                                 | CD244                                 |
| HOXB4               | RP11-258A12.3         | APBB1                                 | CD300A                                |
| HOXB5               | RP11-309I15.1         | APOC1                                 | CD300LF                               |
| HOXB6               | RP11-353N4.5          | AQP1                                  | CD33                                  |
| HOXB7               | RP11-54O7.3           | AR                                    | CD34                                  |
| HOXB-AS3            | RP11-57H14.2          | ARHGAP21                              | CD38                                  |
| hsa-mir-10a         | RP11-616M22.3         | ARHGAP39                              | CEACAM4                               |
| ITGB3               | RP11-616M22.5         | ARHGAP42                              | CHD5                                  |
| KCNK5               | RP11-618I10.1         | ARHGEF12                              | CLC                                   |
| LANCL3              | RSPO1                 | ARHGEF25                              | CLEC12A                               |
| MED12L              | SCGB3A1               | ARHGEF26                              | CLEC12B                               |
| MEIS1               | SHANK1                | ARHGEF37                              | CMTM4                                 |
| NKX2-3              | SLCO5A1               | ART4                                  | CP                                    |
| PDE3A               | ST18                  | ASAP3                                 | CPNE2                                 |
| PDE4DIP             | TCF7L2                | ASPG                                  | CPT1B                                 |
| PDGFD               | TPPP3                 | ATP8A2                                | CPXM1                                 |
| PIEZO2              | TRH                   | B3GNT4                                | CRLF2                                 |
| PLXDC2              | ZFYVE9                | BACH2                                 | CSF1R                                 |
| PLXNC1              |                       | BAI3                                  | CTB-133G6.1                           |
| PRDM16              |                       | BCAR1                                 | CTD-2349B8.1                          |
| RBPMS2              |                       | BCL11B                                | CTD-2562J15.1                         |
| RP11-1055B8.3       |                       | BCL2L11                               | CXorf21                               |
| RP11-1055B8.4       |                       | BEST3                                 | DEPDC7                                |
| RP11-112J1.2        |                       | BEX2                                  | DGKG                                  |
| RP11-129J12.2       |                       | C15orf48                              | DIAPH2                                |
| RP11-353N4.4        |                       | C17orf96                              | DOC2A                                 |
| RP11-354E11.2       |                       | C1orf116                              | FAAH                                  |
| RP11-357H14.19      |                       | C3                                    | FLT3                                  |
| RP1-163G9.1         |                       | C3orf14                               | FSTL3                                 |
| RP1-170O19.20       |                       | C3orf20                               | GAL3ST2                               |
| SCHIP1              |                       | C3orf67                               | GCNT1                                 |
| SDPR                |                       | C5orf4                                | GGT5                                  |
| SELP                |                       | CACHD1                                | GLIPR1                                |
| SEPP1               |                       | CAMK4                                 | GPR114                                |
| SLC40A1             |                       | CAND2                                 | GPR124                                |
| SNED1               |                       | CATSPERB                              | GPR162                                |
| VWF                 |                       | CCDC152                               | GPSM1                                 |

| Upregulated in both | Downregulated in both | Up in NUP98-KDM5A, down in NUP98-NSD1 | Down in NUP98-KDM5A, up in NUP98-NSD1 |
|---------------------|-----------------------|---------------------------------------|---------------------------------------|
| XIRP2               |                       | CCDC64                                | GPT2                                  |
|                     |                       | CCDC68                                | GUCY1A3                               |
|                     |                       | CCNJL                                 | HDAC9                                 |
|                     |                       | CCR7                                  | HOMER3                                |
|                     |                       | CD247                                 | HPGDS                                 |
|                     |                       | CD28                                  | HRH4                                  |
|                     |                       | CD46P1                                | hsa-mir-4763                          |
|                     |                       | CD5                                   | HSH2D                                 |
|                     |                       | CD6                                   | IGKV1-22                              |
|                     |                       | CDC42BPA                              | IGKV2-23                              |
|                     |                       | CDH1                                  | IL3RA                                 |
|                     |                       | CDHR3                                 | ITPRIPL2                              |
|                     |                       | CDKL4                                 | KANK1                                 |
|                     |                       | CECR7                                 | KIAA1383                              |
|                     |                       | CHAC1                                 | KIT                                   |
|                     |                       | CMTM8                                 | LAIR1                                 |
|                     |                       | CNN3                                  | LAMA3                                 |
|                     |                       | CNRIP1                                | LDLRAD2                               |
|                     |                       | CNTN4                                 | LRRC1                                 |
|                     |                       | COL15A1                               | LY86                                  |
|                     |                       | COL25A1                               | MAMDC2                                |
|                     |                       | COL6A6                                | MANEAL                                |
|                     |                       | CPEB2                                 | MDFI                                  |
|                     |                       | CR1L                                  | MGST1                                 |
|                     |                       | CRABP2                                | MLKL                                  |
|                     |                       | CRISP2                                | MTND2P28                              |
|                     |                       | CSDC2                                 | MUC19                                 |
|                     |                       | CSPG4P5                               | NAIP                                  |
|                     |                       | CTH                                   | NETO2                                 |
|                     |                       | CTNNA3                                | NPM2                                  |
|                     |                       | CTSL1                                 | NRXN2                                 |
|                     |                       | CTTN                                  | OLFML2A                               |
|                     |                       | CTXN1                                 | OLIG1                                 |
|                     |                       | CXADR                                 | OSBPL1A                               |
|                     |                       | CXCL5                                 | PDZD7                                 |
|                     |                       | CXCR3                                 | PGAM1P10                              |
|                     |                       | DAB2IP                                | PIWIL4                                |
|                     |                       | DCBLD2                                | PLCB1                                 |
|                     |                       | DCST1                                 | PLCB1-IT1                             |
|                     |                       | DGKI                                  | PLCB2                                 |
|                     |                       | DHDH                                  | PRAM1                                 |
|                     |                       | DLG3                                  | PRDM8                                 |
|                     |                       | DLK1                                  | PRHOXNB                               |
|                     |                       | DMD                                   | PRODH                                 |
|                     |                       | DMGDH                                 | PROM1                                 |
|                     |                       | DMPK                                  | PRRG4                                 |
|                     |                       | DMRTA2                                | PRTN3                                 |
|                     |                       | DMWD                                  | RAB44                                 |
|                     |                       | DNAH8                                 | RFX8                                  |
|                     |                       | DNALI1                                | RHPN1                                 |
|                     |                       | DPPA4                                 | RNASE2                                |
|                     |                       | DPY19L2P1                             | RNASE3                                |
|                     |                       | DSEL                                  | RP11-12A2.1                           |
|                     |                       | DTX1                                  | RP11-269C23.3                         |
|                     |                       | DTX3                                  | RP11-271K11.5                         |
|                     |                       | DUSP4                                 | RP11-274M4.1                          |
|                     |                       | EBF1                                  | RP11-312P12.2                         |
|                     |                       | EDIL3                                 | RP11-325F22.2                         |
|                     |                       | EGLN3                                 | RP11-341G23.4                         |
|                     |                       | ENPP4                                 | RP11-380M3.1                          |
|                     |                       | EOMES                                 | RP11-38J22.6                          |
|                     |                       | EPB41L4A                              | RP11-398F12.1                         |
|                     |                       | EPB41L5                               | RP11-443B7.1                          |
|                     |                       | EPB42                                 | RP11-443B7.3                          |
|                     |                       | EPB49                                 | RP11-511P7.2                          |
|                     |                       | EPCAM                                 | RP11-588K22.2                         |
|                     |                       | EPHA4                                 | RP11-84C10.2                          |
|                     |                       | EPHX2                                 | RP11-946L16.1                         |
|                     |                       | EXPH5                                 | RP4-728D4.2                           |

| Upregulated in both | Downregulated in both | Up in NUP98-KDM5A, down in NUP98-NSD1 | Down in NUP98-KDM5A, up in NUP98-NSD1 |
|---------------------|-----------------------|---------------------------------------|---------------------------------------|
|                     |                       | FAM115D                               | RPA4                                  |
|                     |                       | FAM127A                               | RTN4R                                 |
|                     |                       | FAM127C                               | S100Z                                 |
|                     |                       | FAM178B                               | SCD5                                  |
|                     |                       | FAM186B                               | SKAP2                                 |
|                     |                       | FAM211A                               | SLC17A9                               |
|                     |                       | FAM83F                                | SLC1A3                                |
|                     |                       | FASLG                                 | SLC2A5                                |
|                     |                       | FAT4                                  | SPINK2                                |
|                     |                       | FBLN1                                 | SPNS2                                 |
|                     |                       | FBLN7                                 | SPNS3                                 |
|                     |                       | FHDC1                                 | ST3GAL4                               |
|                     |                       | FKBP10                                | SUCNR1                                |
|                     |                       | FKBP14                                | SV2B                                  |
|                     |                       | FOXJ1                                 | TFEC                                  |
|                     |                       | FRAS1                                 | TMEM221                               |
|                     |                       | FREM1                                 | TMEM51                                |
|                     |                       | GABRE                                 | TMTC2                                 |
|                     |                       | GAD1                                  | TNFSF13B                              |
|                     |                       | GAL                                   | TOP1MT                                |
|                     |                       | GCNT2                                 | TRBV27                                |
|                     |                       | GCNT4                                 | TRBVB                                 |
|                     |                       | GCSAML-AS1                            | TRIM71                                |
|                     |                       | GLB1L2                                | TTLL6                                 |
|                     |                       | GLB1L3                                | U1                                    |
|                     |                       | GLRB                                  | U47924.11                             |
|                     |                       | GLYCTK-AS1                            | U66061.31                             |
|                     |                       | GMMPR                                 | UMODL1                                |
|                     |                       | GNG11                                 | UTF1                                  |
|                     |                       | GPC5                                  | VWA1                                  |
|                     |                       | GPC6                                  | WDR49                                 |
|                     |                       | GPR15                                 |                                       |
|                     |                       | GPR173                                |                                       |
|                     |                       | GPR68                                 |                                       |
|                     |                       | GRHL1                                 |                                       |
|                     |                       | G RTP1                                |                                       |
|                     |                       | GSTM3                                 |                                       |
|                     |                       | GSTM5                                 |                                       |
|                     |                       | GULP1                                 |                                       |
|                     |                       | GYPA                                  |                                       |
|                     |                       | GYPB                                  |                                       |
|                     |                       | GYPE                                  |                                       |
|                     |                       | GZMM                                  |                                       |
|                     |                       | HAPLN3                                |                                       |
|                     |                       | HBG1                                  |                                       |
|                     |                       | HBQ1                                  |                                       |
|                     |                       | HCN2                                  |                                       |
|                     |                       | HEMGN                                 |                                       |
|                     |                       | HEY2                                  |                                       |
|                     |                       | HFM1                                  |                                       |
|                     |                       | HIF3A                                 |                                       |
|                     |                       | HIST1H2AJ                             |                                       |
|                     |                       | HIST1H2BM                             |                                       |
|                     |                       | HIST1H3E                              |                                       |
|                     |                       | HIST1H4F                              |                                       |
|                     |                       | HIST2H3DP1                            |                                       |
|                     |                       | HLF                                   |                                       |
|                     |                       | HMGA2                                 |                                       |
|                     |                       | HMGB1P20                              |                                       |
|                     |                       | HOMER1                                |                                       |
|                     |                       | HOOK1                                 |                                       |
|                     |                       | HRC                                   |                                       |
|                     |                       | HRK                                   |                                       |
|                     |                       | HS3ST4                                |                                       |
|                     |                       | ICOS                                  |                                       |
|                     |                       | IFI27                                 |                                       |
|                     |                       | IFIT1B                                |                                       |
|                     |                       | IGF1R                                 |                                       |
|                     |                       | IGF2BP1                               |                                       |

| Upregulated in both | Downregulated in both | Up in NUP98-KDM5A, down in NUP98-NSD1 | Down in NUP98-KDM5A, up in NUP98-NSD1 |
|---------------------|-----------------------|---------------------------------------|---------------------------------------|
|                     |                       | IGLV6-57                              |                                       |
|                     |                       | IGSF11                                |                                       |
|                     |                       | IGSF3                                 |                                       |
|                     |                       | IGSF9                                 |                                       |
|                     |                       | IKZF3                                 |                                       |
|                     |                       | IL21R                                 |                                       |
|                     |                       | IL2RB                                 |                                       |
|                     |                       | INPP5J                                |                                       |
|                     |                       | IRF4                                  |                                       |
|                     |                       | IRF6                                  |                                       |
|                     |                       | IRX1                                  |                                       |
|                     |                       | IRX5                                  |                                       |
|                     |                       | ITK                                   |                                       |
|                     |                       | ITPKA                                 |                                       |
|                     |                       | JMY                                   |                                       |
|                     |                       | KBTD12                                |                                       |
|                     |                       | KCNJ12                                |                                       |
|                     |                       | KCNQ4                                 |                                       |
|                     |                       | KCP                                   |                                       |
|                     |                       | KIAA1377                              |                                       |
|                     |                       | KIF5A                                 |                                       |
|                     |                       | KLF1                                  |                                       |
|                     |                       | KLRC3                                 |                                       |
|                     |                       | KREMEN1                               |                                       |
|                     |                       | KRT8P31                               |                                       |
|                     |                       | KRT8P34                               |                                       |
|                     |                       | LA16c-349E10.1                        |                                       |
|                     |                       | LCA5                                  |                                       |
|                     |                       | LCK                                   |                                       |
|                     |                       | LDOC1                                 |                                       |
|                     |                       | LEF1                                  |                                       |
|                     |                       | LEF1-AS1                              |                                       |
|                     |                       | LEFTY2                                |                                       |
|                     |                       | LGR4                                  |                                       |
|                     |                       | LGR6                                  |                                       |
|                     |                       | LIN28B                                |                                       |
|                     |                       | LINC00570                             |                                       |
|                     |                       | LINC00654                             |                                       |
|                     |                       | LMCD1                                 |                                       |
|                     |                       | LPIN3                                 |                                       |
|                     |                       | LRRC2                                 |                                       |
|                     |                       | LRRC49                                |                                       |
|                     |                       | LRRC7                                 |                                       |
|                     |                       | LRRC73                                |                                       |
|                     |                       | LRRC8E                                |                                       |
|                     |                       | LRRN3                                 |                                       |
|                     |                       | LRRN4CL                               |                                       |
|                     |                       | LTA                                   |                                       |
|                     |                       | MAGEE1                                |                                       |
|                     |                       | MAGI1                                 |                                       |
|                     |                       | MAGI2-AS3                             |                                       |
|                     |                       | MAMLD1                                |                                       |
|                     |                       | MAOA                                  |                                       |
|                     |                       | MAP3K13                               |                                       |
|                     |                       | MAP9                                  |                                       |
|                     |                       | MAPK10                                |                                       |
|                     |                       | MATN2                                 |                                       |
|                     |                       | MB21D2                                |                                       |
|                     |                       | MECOM                                 |                                       |
|                     |                       | MEG3                                  |                                       |
|                     |                       | MEIOB                                 |                                       |
|                     |                       | MEIS2                                 |                                       |
|                     |                       | MET                                   |                                       |
|                     |                       | MEX3A                                 |                                       |
|                     |                       | MIR4732                               |                                       |
|                     |                       | MLLT3                                 |                                       |
|                     |                       | MOBP                                  |                                       |
|                     |                       | MSX2                                  |                                       |
|                     |                       | MTUS2-AS1                             |                                       |

| Upregulated in both | Downregulated in both | Up in NUP98-KDM5A, down in NUP98-NSD1 | Down in NUP98-KDM5A, up in NUP98-NSD1 |
|---------------------|-----------------------|---------------------------------------|---------------------------------------|
|                     |                       | MTX3                                  |                                       |
|                     |                       | MYEF2                                 |                                       |
|                     |                       | MYL4                                  |                                       |
|                     |                       | MYL9                                  |                                       |
|                     |                       | MYO16                                 |                                       |
|                     |                       | MYO18B                                |                                       |
|                     |                       | MYO3B                                 |                                       |
|                     |                       | NAP1L3                                |                                       |
|                     |                       | NBEA                                  |                                       |
|                     |                       | NCKAP1                                |                                       |
|                     |                       | NCR2                                  |                                       |
|                     |                       | NDRG4                                 |                                       |
|                     |                       | NEIL1                                 |                                       |
|                     |                       | NELL2                                 |                                       |
|                     |                       | NEO1                                  |                                       |
|                     |                       | NFATC4                                |                                       |
|                     |                       | NFIA                                  |                                       |
|                     |                       | NGFRAP1                               |                                       |
|                     |                       | NKAIN2                                |                                       |
|                     |                       | NLGN1                                 |                                       |
|                     |                       | NUDT10                                |                                       |
|                     |                       | NUDT11                                |                                       |
|                     |                       | NUP62CL                               |                                       |
|                     |                       | ONECUT2                               |                                       |
|                     |                       | OPTN                                  |                                       |
|                     |                       | OSBP2                                 |                                       |
|                     |                       | OTUD7B                                |                                       |
|                     |                       | P2RY10                                |                                       |
|                     |                       | PAIP2B                                |                                       |
|                     |                       | PAQR9                                 |                                       |
|                     |                       | PARD3B                                |                                       |
|                     |                       | PARK2                                 |                                       |
|                     |                       | PBK                                   |                                       |
|                     |                       | PBX1                                  |                                       |
|                     |                       | PCDH9                                 |                                       |
|                     |                       | PCDHB13                               |                                       |
|                     |                       | PCDHB14                               |                                       |
|                     |                       | PCDHB9                                |                                       |
|                     |                       | PCGF2                                 |                                       |
|                     |                       | PCYT1B                                |                                       |
|                     |                       | PDZK1IP1                              |                                       |
|                     |                       | PGF                                   |                                       |
|                     |                       | PHLDB1                                |                                       |
|                     |                       | PHLDB2                                |                                       |
|                     |                       | PHOSPHO1                              |                                       |
|                     |                       | PI4K2A                                |                                       |
|                     |                       | PIR                                   |                                       |
|                     |                       | PKIA                                  |                                       |
|                     |                       | PKP2                                  |                                       |
|                     |                       | PLAG1                                 |                                       |
|                     |                       | PLCL1                                 |                                       |
|                     |                       | PLEK2                                 |                                       |
|                     |                       | PLEKHA8                               |                                       |
|                     |                       | PLEKHG1                               |                                       |
|                     |                       | PLEKHG4B                              |                                       |
|                     |                       | PLOD2                                 |                                       |
|                     |                       | PLSCR4                                |                                       |
|                     |                       | PON2                                  |                                       |
|                     |                       | PPAPDC3                               |                                       |
|                     |                       | PPP2R3A                               |                                       |
|                     |                       | PRAME                                 |                                       |
|                     |                       | PRDX2                                 |                                       |
|                     |                       | PRKG2                                 |                                       |
|                     |                       | PRL                                   |                                       |
|                     |                       | PROX1                                 |                                       |
|                     |                       | PRPH2                                 |                                       |
|                     |                       | PRR15                                 |                                       |
|                     |                       | PRRG1                                 |                                       |
|                     |                       | PRRT2                                 |                                       |

| Upregulated in both | Downregulated in both | Up in NUP98-KDM5A, down in NUP98-NSD1 | Down in NUP98-KDM5A, up in NUP98-NSD1 |
|---------------------|-----------------------|---------------------------------------|---------------------------------------|
|                     |                       | PRTFDC1                               |                                       |
|                     |                       | PSD3                                  |                                       |
|                     |                       | PTCH1                                 |                                       |
|                     |                       | PTGER3                                |                                       |
|                     |                       | PTPRU                                 |                                       |
|                     |                       | PTRF                                  |                                       |
|                     |                       | PURG                                  |                                       |
|                     |                       | RAB30                                 |                                       |
|                     |                       | RAB36                                 |                                       |
|                     |                       | RAPGEF5                               |                                       |
|                     |                       | RASSF6                                |                                       |
|                     |                       | RBFOX2                                |                                       |
|                     |                       | RBM11                                 |                                       |
|                     |                       | RGMB                                  |                                       |
|                     |                       | RGS16                                 |                                       |
|                     |                       | RGS22                                 |                                       |
|                     |                       | RGS6                                  |                                       |
|                     |                       | RHAG                                  |                                       |
|                     |                       | RHCE                                  |                                       |
|                     |                       | RHD                                   |                                       |
|                     |                       | RIC3                                  |                                       |
|                     |                       | RIMS3                                 |                                       |
|                     |                       | RNF144A-AS1                           |                                       |
|                     |                       | RNF150                                |                                       |
|                     |                       | RNF182                                |                                       |
|                     |                       | ROBO1                                 |                                       |
|                     |                       | ROBO2                                 |                                       |
|                     |                       | ROR1                                  |                                       |
|                     |                       | RORA                                  |                                       |
|                     |                       | RP11-104L21.2                         |                                       |
|                     |                       | RP11-11N9.4                           |                                       |
|                     |                       | RP11-1299A16.3                        |                                       |
|                     |                       | RP11-136K14.1                         |                                       |
|                     |                       | RP11-136K14.2                         |                                       |
|                     |                       | RP11-13K12.1                          |                                       |
|                     |                       | RP11-214C8.2                          |                                       |
|                     |                       | RP11-229C3.2                          |                                       |
|                     |                       | RP11-26F2.1                           |                                       |
|                     |                       | RP11-277P12.20                        |                                       |
|                     |                       | RP11-277P12.6                         |                                       |
|                     |                       | RP11-281P23.1                         |                                       |
|                     |                       | RP11-296E7.1                          |                                       |
|                     |                       | RP11-313J2.1                          |                                       |
|                     |                       | RP11-348F1.3                          |                                       |
|                     |                       | RP11-382A20.2                         |                                       |
|                     |                       | RP11-382A20.3                         |                                       |
|                     |                       | RP11-382A20.4                         |                                       |
|                     |                       | RP11-384P7.7                          |                                       |
|                     |                       | RP11-463O12.3                         |                                       |
|                     |                       | RP11-501J20.5                         |                                       |
|                     |                       | RP11-548K23.11                        |                                       |
|                     |                       | RP11-553L6.2                          |                                       |
|                     |                       | RP11-56N19.5                          |                                       |
|                     |                       | RP11-571M6.6                          |                                       |
|                     |                       | RP11-578F21.10                        |                                       |
|                     |                       | RP11-578F21.12                        |                                       |
|                     |                       | RP11-57H12.2                          |                                       |
|                     |                       | RP11-594N15.3                         |                                       |
|                     |                       | RP11-659G9.3                          |                                       |
|                     |                       | RP11-66D17.5                          |                                       |
|                     |                       | RP11-673E1.3                          |                                       |
|                     |                       | RP11-734I18.1                         |                                       |
|                     |                       | RP11-844P9.2                          |                                       |
|                     |                       | RP11-87G24.6                          |                                       |
|                     |                       | RP1-18D14.7                           |                                       |
|                     |                       | RP11-90D4.2                           |                                       |
|                     |                       | RP11-94L15.2                          |                                       |
|                     |                       | RP1-34L19.1                           |                                       |
|                     |                       | RP3-453I5.2                           |                                       |

| Upregulated in both | Downregulated in both | Up in NUP98-KDM5A, down in NUP98-NSD1 | Down in NUP98-KDM5A, up in NUP98-NSD1 |
|---------------------|-----------------------|---------------------------------------|---------------------------------------|
|                     |                       | RP4-811H24.9                          |                                       |
|                     |                       | RP5-1071N3.1                          |                                       |
|                     |                       | RP5-877J2.1                           |                                       |
|                     |                       | RP5-884M6.1                           |                                       |
|                     |                       | RPL36AP15                             |                                       |
|                     |                       | RPS6KL1                               |                                       |
|                     |                       | RRAS2                                 |                                       |
|                     |                       | RYR3                                  |                                       |
|                     |                       | SALL2                                 |                                       |
|                     |                       | SCML1                                 |                                       |
|                     |                       | SCN9A                                 |                                       |
|                     |                       | SCRN1                                 |                                       |
|                     |                       | SDR42E1                               |                                       |
|                     |                       | SELENBP1                              |                                       |
|                     |                       | SEMA3C                                |                                       |
|                     |                       | SERPINE2                              |                                       |
|                     |                       | SFRP1                                 |                                       |
|                     |                       | SGIP1                                 |                                       |
|                     |                       | SH2D1B                                |                                       |
|                     |                       | SH2D2A                                |                                       |
|                     |                       | SH3BGRL2                              |                                       |
|                     |                       | SIT1                                  |                                       |
|                     |                       | SKAP1                                 |                                       |
|                     |                       | SLAMF7                                |                                       |
|                     |                       | SLC16A1                               |                                       |
|                     |                       | SLC16A10                              |                                       |
|                     |                       | SLC22A1                               |                                       |
|                     |                       | SLC22A23                              |                                       |
|                     |                       | SLC25A27                              |                                       |
|                     |                       | SLC2A4                                |                                       |
|                     |                       | SLC30A10                              |                                       |
|                     |                       | SLC30A4                               |                                       |
|                     |                       | SLC35G1                               |                                       |
|                     |                       | SLC41A1                               |                                       |
|                     |                       | SLC4A1                                |                                       |
|                     |                       | SLC7A11                               |                                       |
|                     |                       | SLC7A3                                |                                       |
|                     |                       | SLC9C1                                |                                       |
|                     |                       | SLFN13                                |                                       |
|                     |                       | SMPDL3A                               |                                       |
|                     |                       | SNX22                                 |                                       |
|                     |                       | SNX25                                 |                                       |
|                     |                       | SOBP                                  |                                       |
|                     |                       | SOWAHC                                |                                       |
|                     |                       | SOX5                                  |                                       |
|                     |                       | SOX6                                  |                                       |
|                     |                       | SPAG16                                |                                       |
|                     |                       | SPTB                                  |                                       |
|                     |                       | SPTBN4                                |                                       |
|                     |                       | SSTR3                                 |                                       |
|                     |                       | STAC                                  |                                       |
|                     |                       | STK31                                 |                                       |
|                     |                       | STK33                                 |                                       |
|                     |                       | SULT4A1                               |                                       |
|                     |                       | SYDE1                                 |                                       |
|                     |                       | SYDE2                                 |                                       |
|                     |                       | SYNGR3                                |                                       |
|                     |                       | TAL1                                  |                                       |
|                     |                       | TBC1D8B                               |                                       |
|                     |                       | TBX2                                  |                                       |
|                     |                       | TBX21                                 |                                       |
|                     |                       | TEAD1                                 |                                       |
|                     |                       | TEAD2                                 |                                       |
|                     |                       | TEX15                                 |                                       |
|                     |                       | TGM2                                  |                                       |
|                     |                       | THEM5                                 |                                       |
|                     |                       | THRB                                  |                                       |
|                     |                       | TIAM1                                 |                                       |
|                     |                       | TIMP3                                 |                                       |

| Upregulated in both | Downregulated in both | Up in NUP98-KDM5A, down in NUP98-NSD1 | Down in NUP98-KDM5A, up in NUP98-NSD1 |
|---------------------|-----------------------|---------------------------------------|---------------------------------------|
|                     |                       | TMEM133                               |                                       |
|                     |                       | TMEM136                               |                                       |
|                     |                       | TMEM163                               |                                       |
|                     |                       | TMEM246                               |                                       |
|                     |                       | TMEM45A                               |                                       |
|                     |                       | TMEM56                                |                                       |
|                     |                       | TMEM98                                |                                       |
|                     |                       | TMOD1                                 |                                       |
|                     |                       | TMPRSS4                               |                                       |
|                     |                       | TNS1                                  |                                       |
|                     |                       | TRAV13-1                              |                                       |
|                     |                       | TRBV2                                 |                                       |
|                     |                       | TRBV26OR9-2                           |                                       |
|                     |                       | TRIM32                                |                                       |
|                     |                       | TRO                                   |                                       |
|                     |                       | TRPC1                                 |                                       |
|                     |                       | TRPV3                                 |                                       |
|                     |                       | TRPV6                                 |                                       |
|                     |                       | TSPAN6                                |                                       |
|                     |                       | TSPYL5                                |                                       |
|                     |                       | TUBB2A                                |                                       |
|                     |                       | TUBB4A                                |                                       |
|                     |                       | UBASH3A                               |                                       |
|                     |                       | ULBP1                                 |                                       |
|                     |                       | VPREB3                                |                                       |
|                     |                       | VWDE                                  |                                       |
|                     |                       | WBP5                                  |                                       |
|                     |                       | WWC1                                  |                                       |
|                     |                       | XKR6                                  |                                       |
|                     |                       | XXbac-BPG154L12.4                     |                                       |
|                     |                       | YPEL4                                 |                                       |
|                     |                       | Z83844.1                              |                                       |
|                     |                       | Z95704.2                              |                                       |
|                     |                       | ZC3H12B                               |                                       |
|                     |                       | ZDBF2                                 |                                       |
|                     |                       | ZDHHC15                               |                                       |
|                     |                       | ZFP112                                |                                       |
|                     |                       | ZNF205                                |                                       |
|                     |                       | ZNF229                                |                                       |
|                     |                       | ZNF233                                |                                       |
|                     |                       | ZNF300                                |                                       |
|                     |                       | ZNF354C                               |                                       |
|                     |                       | ZNF483                                |                                       |
|                     |                       | ZNF711                                |                                       |
|                     |                       | ZNF876P                               |                                       |
|                     |                       | ZNF883                                |                                       |





| NUP98-KDMSA upregulated                              | p.geomean | stat.mean | p.val    | q.val    | set.size |
|------------------------------------------------------|-----------|-----------|----------|----------|----------|
| NIKOLSKY_BREAST_CANCER_17Q21_Q25_AMPLICON            | 0.150558  | 0.657903  | 0.004329 | 0.070937 | 280      |
| TAVOR_CEBPA_TARGETS_DN                               | 0.150503  | 0.669747  | 0.004361 | 0.071102 | 30       |
| LOPES_METHYLATED_IN_COLON_CANCER_UP                  | 0.194188  | 0.671626  | 0.004393 | 0.071257 | 20       |
| REACTOME_PLATELET_AGGREGATION_PLUG_FORMATION         | 0.136952  | 0.666726  | 0.004485 | 0.072038 | 31       |
| GREENBAUM_E2A_TARGETS_UP                             | 0.050655  | 0.693069  | 0.004486 | 0.072038 | 33       |
| NUMATA_CSF3_SIGNALING_VIA_STAT3                      | 0.219319  | 0.665706  | 0.00457  | 0.073027 | 19       |
| NIKOLSKY_BREAST_CANCER_17Q11_Q21_AMPLICON            | 0.200528  | 0.65388   | 0.004603 | 0.073194 | 95       |
| YEGNASUBRAMANIAN_PROSTATE_CANCER                     | 0.174365  | 0.654913  | 0.004626 | 0.073204 | 81       |
| SABATES_COLORECTAL_ADENOMA_UP                        | 0.113258  | 0.658881  | 0.004737 | 0.074588 | 72       |
| MCCLUNG_DELTA_FOSB_TARGETS_2WK                       | 0.205209  | 0.65206   | 0.004985 | 0.078047 | 35       |
| VILIMAS_NOTCH1_TARGETS_UP                            | 0.056403  | 0.651321  | 0.005005 | 0.078047 | 48       |
| KUNINGER_IGF1_VS_PDGFβ_TARGETS_DN                    | 0.186594  | 0.648284  | 0.005212 | 0.080589 | 38       |
| SHETH_LIVER_CANCER_VS_TXNIP_LOSS_PAM5                | 0.199648  | 0.644684  | 0.005218 | 0.080589 | 67       |
| SHEN_SMARCA2_TARGETS_DN                              | 0.115117  | 0.641516  | 0.005308 | 0.081593 | 198      |
| BILD_E2F3_ONCOGENIC_SIGNATURE                        | 0.133422  | 0.638549  | 0.005477 | 0.083595 | 214      |
| DARWICHE_PAPILLOMA_RISK_HIGH_VS_LOW_DN               | 0.227505  | 0.643651  | 0.00549  | 0.083595 | 28       |
| OHGUCHI_LIVER_HNF4A_TARGETS_UP                       | 0.180409  | 0.64522   | 0.005565 | 0.084344 | 34       |
| DAWSON_METHYLATED_IN_LYMPHOMA_TCL1                   | 0.19762   | 0.637527  | 0.00602  | 0.090806 | 36       |
| AFFAR_Y1_TARGETS_UP                                  | 0.151458  | 0.626024  | 0.006337 | 0.095143 | 154      |
| REICHERT_MITOSIS_LIN9_TARGETS                        | 0.040209  | 0.6739    | 0.006427 | 0.096045 | 28       |
| REACTOME_FGFR_LIGAND_BINDING_AND_ACTIVATION          | 0.183639  | 0.663426  | 0.006472 | 0.096094 | 10       |
| AKL_HTLV1_INFECTION_DN                               | 0.186043  | 0.626386  | 0.00649  | 0.096094 | 64       |
| SMID_BREAST_CANCER_RELAPSE_IN_BONE_UP                | 0.206513  | 0.624367  | 0.006592 | 0.097169 | 61       |
| KRASNOSELSKAYA_ILF3_TARGETS_UP                       | 0.146479  | 0.631489  | 0.006722 | 0.098435 | 33       |
| ASGHARZADEH_NEUROBLASTOMA_POOR_SURVIVAL_DN           | 0.223464  | 0.623971  | 0.006739 | 0.098435 | 37       |
| TONKS_TARGETS_OF_RUNX1_RUNX1T1_FUSION GRANULOCYTE_UP | 0.084835  | 0.627408  | 0.006899 | 0.099839 | 55       |
| ODONNELL_TARGETS_OF_MYC_AND_TFRC_DN                  | 0.047311  | 0.644783  | 0.006912 | 0.099839 | 43       |
| FINAK_BREAST_CANCER_SDPP_SIGNATURE                   | 0.188026  | 0.636233  | 0.006981 | 0.099839 | 16       |
| ACEVEDO_LIVER_CANCER_WITH_H3K27ME3_DN                | 0.130456  | 0.617754  | 0.007013 | 0.099839 | 144      |
| LINDVALL_IMMORTALIZED_BY_TERT_UP                     | 0.164406  | 0.619791  | 0.007017 | 0.099839 | 64       |
| MAHADEVAN_IMATINIB_RESISTANCE_UP                     | 0.171963  | 0.64568   | 0.007021 | 0.099839 | 14       |







































Supplemental table 10. List of compounds of every screened drug library

| Spectrum library                                                                | Prestwick library                       | Sequoia library           | ENZO library                        | DNA damage library                     | Cayman library                     |
|---------------------------------------------------------------------------------|-----------------------------------------|---------------------------|-------------------------------------|----------------------------------------|------------------------------------|
| 1-(2-METHOXYPHENYL)PIRAZINE HYDROCHLORIDE                                       | (-) -Levobunolol hydrochloride          | 10-Hydroxycamptothecin    | 2,4-Pyridinedicarboxylic Acid       | (+)-JQ-1                               | (-)-Neplanocin A                   |
| 1,2alpha-EPOXYDEACETOXYDIHYDROGED UNIN                                          | (-)-Emtricitabine                       | 2'-DEOXY-5-FLUOROURIDINE  | 5-Aza-2'-deoxycytidine (Decitabine) | 17-AAG                                 | (S)-HDAC-42                        |
| 1,2-DIMETHYLHYDRAZINE HYDROCHLORIDE                                             | (-)-Eseroline fumarate salt             | 2'-Deoxy-5-methylcytidine | AGK2                                | 4'-Demethylepipodophyllotoxin          | 1-Naphthoid Acid                   |
| 1,3-DIDEACETYL-7-DEACETOXY-7-OXOKHIVORIN                                        | (-)-Isoproterenol hydrochloride         | 5'-DEOXY-5-FLUOROCYTISINE | Aminoresveratrol sulfate            | 4SC-202 (free base)                    | 2',3',5'-triacetyl-5-Azacytidine   |
| 1,4,5,8-TETRAHYDROXY-2,6-DIMETHYLANTHROQUINONE                                  | (-)-MK 801 hydrogen maleate             | 7-EPI-TAXOL               | Anacardic acid                      | 5-Azacytidine                          | 2,4-DPD                            |
| 1,7-DIDEACETOXY-1,7-DIOXO-3-DEACETYLKHIVORIN                                    | (+) -Levobunolol hydrochloride          | HYDROXYCAMPTOTHECIN       | Apicidin                            | 5-BrdU                                 | 2-PCPA (hydrochloride)             |
| 1,7-DIDEACETOXY-1,7-DIOXOKHIVORIN                                               | (+) -Isoproterenol (+)-bitartrate salt  | A-769662                  | B2                                  | 5-Fluorouracil                         | 3-amino benzamide                  |
| 10-HYDROXYCAMPTOTHECIN                                                          | (+,-)-Octopamine hydrochloride          | ABIRATERONE               | BIX-01294-3HCl                      | 6-Mercaptopurine                       | 3-Deazaneplanocin A                |
| 11a-ACETOXYPROGESTERONE                                                         | (+,-)-Synephrine                        | ABIRATERONE ACETATE       | BML-210                             | 6-Thioguanine                          | 4-iodo SAHA                        |
| 11-OXOURSOLIC ACID ACETATE                                                      | (R) -Naproxen sodium salt               | ABT-263                   | BML-266                             | A-366                                  | AGK2                               |
| 12a-HYDROXY-9-DEMETHYLMUNDUSERONE-8-CARBOXYLIC ACID                             | (R)-(+)-Atenolol                        | ABT-888                   | BML-278                             | A-966492                               | Anacardic Acid                     |
| 12-HYDROXY-4,4-BISNOR-4,8,11,13-PODOCARPATETRAEN-3-ONE                          | (R)-Propranolol hydrochloride           | ACLARUBICIN HCL           | BML-281                             | ABT-751                                | Apicidin                           |
| 12-METHOXY-4,4-BISNOR-5beta-8,11,13-PODOCARPATRIEN-3-OL                         | (S)-(-)-Atenolol                        | ADRIAMYCIN                | Butyrolactone 3                     | ACY-1215                               | Benzenebutanoic Acid (sodium salt) |
| 13-METHYL-4,4-BISNOR-8,11,13-PODOCARPATRIEN-3-ONE                               | (S)-(-)-Cycloserine                     | AFATINIB                  | CI-994                              | Adenine                                | BIX01294 (hydrochloride hydrate)   |
| 15-NORCARYOPHYLLEN-3-ONE                                                        | (S)-propranolol hydrochloride           | ALARELIN ACETATE          | CTPB                                | Adenosine                              | CAY10398                           |
| 18alpha-GLYCYRRHETINIC ACID                                                     | 2-Aminobenzenesulfonamide               | AMG-458                   | EX-527                              | Alisertib                              | CAY10433                           |
| 18-AMINOABIETA-8,11,13-TRIENE SULFATE                                           | 2-Chloropyrazine                        | ANASTROZOLE               | Fluoro-SAHA                         | Altretamine                            | CAY10603                           |
| 1-HYDROXY-3,6,7-TRIMETHOXY-2,8-DIPRENYLXANTHONE                                 | 3-alpha-Hydroxy-5-beta-androstan-17-one | APREPITANT                | Garcinol                            | Alvespimycin (hydrochloride)           | CBHA                               |
| 1-MONOPALMITIN                                                                  | 4-aminosalicylic acid                   | AS703026                  | Isonicotinamide                     | AMG 900                                | CCG-100602                         |
| 1R,2S-PHENYLPROPYLAMINE                                                         | 5-fluorouracil                          | AXITINIB                  | ITSA-1                              | AMG 925                                | Chidamide                          |
| 2,2'-AZO-bis-2-AMINOPROPANE                                                     | 6-Furfurylaminopurine                   | AZD-4547                  | M-344                               | AMI-1                                  | CI-Amidine                         |
| 2',2'-BISEPIGALLOCATECHIN DIGALLATE                                             | Abacavir Sulfate                        | AZD-6244                  | MC-1293                             | Amodiaquin (dihydrochloride dihydrate) | DMOG                               |
| 2,3,4-TRIHYDROXY-4'-ETHOXYBENZOPHENONE                                          | Acamprosate calcium                     | AZD-8055                  | NCH-51                              | Amonafide                              | Ellagic Acid                       |
| 2,3,4'-TRIHYDROXY-4-METHOXYBENZOPHENONE                                         | Acarbose                                | BAY 60-7550               | Nicotinamide                        | Amsacrine                              | Ex-527                             |
| 2',3-DIHYDROXY-4,4',6'-TRIMETHOXYCHALCONE                                       | Acebutolol hydrochloride                | BLEOMYCIN SULPHATE        | NSC-3852                            | APTO-253                               | F-Amidine (trifluoroacetate salt)  |
| 2,3-DIHYDROXY-4-METHOXYBENZOPHENONE                                             | Aceclidine Hydrochloride                | BMS-777607                | Nullscript                          | ARRY-520                               | Garcinol                           |
| 2,3-DIHYDROXY-6,7-DICHLOROQUINOXALINE                                           | Aceclofenac                             | BMS-794833                | Oxamflatin                          | ARRY-520 (R enantiomer)                | HC Toxin                           |
| 2',4-DIHYDROXY-3,4',6'-TRIMETHOXYCHALCONE                                       | Acefylline                              | BORTEZOMIB                | Phenylbutyrate-Na                   | AT7519 (Hydrochloride)                 | HNHA                               |
| 2',4'-DIHYDROXY-4-METHOXYCHALCONE                                               | Acemetacin                              | BOSUTINIB Isomer 1        | Piceatannol                         | AT7519 (trifluoroacetate)              | I-BET                              |
| 2',4'-DIHYDROXYCHALCONE                                                         | Acenocoumarol                           | BRIVANIB ALANINATE        | Resveratrol                         | AT9283                                 | Isoliquiritigenin                  |
| 2',4'-DIHYDROXYCHALCONE                                                         | Acetaminophen                           | BUSERELIN ACETATE         | Salmeteride                         | Aurora A inhibitor I                   | JGB1741                            |
| 2',4'-DIHYDROXYCHALCONE 4'-GLUCOSIDE                                            | Acetazolamide                           | CANERTINIB DIHCL          | Scriptaid                           | AZ20                                   | M 344                              |
| 2',5'-DIHYDROXY-4-METHOXYCHALCONE                                               | Acetohexamide                           | CARMUSTINE                | Sirtinol                            | AZ3146                                 | Mirin                              |
| 2,6-DIHYDROXY-4-METHOXYTOLUENE                                                  | Acetopromazine maleate salt             | CCG-63802                 | Splitomicin                         | AZD1152                                | MS-275                             |
| 2,6-DIMETHOXYQUINONE                                                            | Acetylcysteine                          | CCG-63808                 | Suberoyl bis-hydroxamic acid        | AZD1152-HQPA                           | Nicotinamide                       |
| 21-ACETOXPREGNENOLONE                                                           | Acetylsalicylic acid                    | CDDO Methyl ester         | Suramin-6Na                         | AZD-2461                               | Oxamflatin                         |
| 2-BENZOYL-5-METHOXYBENZOQUINONE                                                 | Acetylsalicylsalicylic acid             | CEDIRANIB                 | Tranlycypromine hemisulfate         | AZD-5438                               | Phthalazinone pyrazole             |
| 2-HYDROXY-3,4-DIMETHOXYBENZOIC ACID                                             | Acipimox                                | CISPLATIN                 | Triacetyresveratrol                 | AZD6738                                | Piceatannol                        |
| 2-HYDROXY-5 (6)EPOXY-TETRAHYDROCARYOPHYLLENE                                    | Acitretin                               | CLADRIBINE                | Trichostatin A                      | AZD-7762                               | Pimelic Diphenylamide 106          |
| 2-ISOPROPYL-3-METHOXYCINNAMIC ACID                                              | Acyclovir                               | CLOFARABINE               | Valproic acid                       | Balaglitazone                          | RG-108                             |
| 2-MERCAPTOBENZOTHAZOLE                                                          | Adamantamine fumarate                   | CP-690550                 | Valproic acid hydroxamate           | b-AP15                                 | S-Adenosylhomocysteine             |
| 2-METHOXY-5 (6)EPOXY-TETRAHYDROCARYOPHYLLENE                                    | Adenosine 5'-monophosphate monohydrate  | CRIZOTINIB                | Vorinostat (SAHA)                   | Belinostat                             | SAHA                               |
| 2'-METHOXYFORMONETIN                                                            | Adiphenine hydrochloride                | CYC-116                   | Zebularine                          | Betulinic acid                         | Salmeteride                        |
| 2-METHOXYRESORCINOL                                                             | Adrenosterone                           | CYT387                    |                                     | Bezafibrate                            | Scriptaid                          |
| 2-METHYL GRAMINE                                                                | Albendazole                             | CYTARABINE                |                                     | BG45                                   | Sinefungin                         |
| 2-METHYL-4-(PIPERIDIN-1-YLCARBOXY)-5-ISOPROPYLPHENYLTRIMETHYLA MMONIUM CHLORIDE | Alclometasone dipropionate              | DASATINIB                 |                                     | BI 2536                                | Sodium Butyrate                    |
| 2-METHYL-5,7,8-TRIMETHOXYISOFLAVONE                                             | Alcuronium chloride                     | Daun02                    |                                     | BIBR 1532                              | Splitomycin                        |

| Spectrum library                                                                           | Prestwick library                    | Sequoia library               | ENZO library | DNA damage library           | Cayman library              |
|--------------------------------------------------------------------------------------------|--------------------------------------|-------------------------------|--------------|------------------------------|-----------------------------|
| 2-METHYLENE-5-(2,5-DIOXOTETRAHYDROFURAN-3-YL)-6-OXO-10,10-DIMETHYLBICYCLO[7: 2: 0]UNDECANE | Alendronate sodium                   | DAUNORUBICINHCl               |              | BIIB021                      | Suberohydroxamic Acid       |
| 2-THIURACIL                                                                                | Alexidine dihydrochloride            | Dideoxycytidine               |              | BIO                          | Suramin (sodium salt)       |
| 3,16-DIDEOXYMEXICANOLIDE-3beta-DIOL                                                        | Alfacalcidol                         | DOCETAXEL                     |              | BIX-01294                    | Tenovin-1                   |
| 3,3'-DIINDOLYLMETHANE                                                                      | Alfadolone acetate                   | DOVITINIB LACTATE             |              | BMH-21                       | Tenovin-6                   |
| 3,4',5,6,7-PENTAMETHOXYFLAVONE                                                             | Alfaxalone                           | DOXIFLURIDINE                 |              | BML-210                      | trans-resveratrol           |
| 3,4-DIDESMETHYL-5-DESHYDROXY-3'-ETHOXYSCLERIOLIN                                           | Alfuzosin hydrochloride              | DOXORUBICIN HYDROCHLORIDE     |              | BML-277                      | Trichostatin A              |
| 3,4-DIMETHOXYDALBERGIONE                                                                   | Alizapride HCl                       | ELACRIDAR                     |              | BMS-265246                   | Tubastatin A                |
| 3,4'-DIMETHOXYFLAVONE                                                                      | Allantoin                            | ELACRIDAR HCl                 |              | BRD4770                      | UNC0224                     |
| 3,6-DIMETHOXYFLAVONE                                                                       | Allopurinol                          | ENOCITABINE                   |              | BRD7116                      | UNC0321                     |
| 3,7-DIHYDROXYFLAVONE                                                                       | Alprenolol hydrochloride             | EPIRUBICIN HYDROCHLORIDE      |              | BRD73954                     | UNC0638                     |
| 3,7-DIMETHOXYFLAVONE                                                                       | Alprostadiol                         | EPTAPLATIN                    |              | Bromosporine                 | Valproic Acid (sodium salt) |
| 3,7-EPOXYCARYOPHYLLAN-6-OL                                                                 | Althiazide                           | ERLOTINIB                     |              | BSI-201                      | Zebularine                  |
| 3,7-EPOXYCARYOPHYLLAN-6-ONE                                                                | Altretamine                          | ERLOTINIB HCl                 |              | Busulfan                     |                             |
| 3-ACETAMIDOCOUMARIN                                                                        | Alverine citrate salt                | ERLOTINIB MESYLATE            |              | Cabazitaxel                  |                             |
|                                                                                            |                                      | ESTRAMUSTINE SODIUM PHOSPHATE |              |                              |                             |
| 3-ACETYLGEDUNOL                                                                            | Ambrisentan                          |                               |              | Campathecin                  |                             |
| 3alpha-ACETOXYDIHYDRODEOXYGEDUNIN                                                          | Ambroxol hydrochloride               | ETOPOSIDE                     |              | Capecitabine                 |                             |
| 3alpha-HYDROXY-4,4-BISNOR-8,11,13-PODOCARPATRIENE                                          | Amcinonide                           | EXEMESTANE                    |              | Carboplatin                  |                             |
| 3-AMINO-1,2,4-TRIAZOLE                                                                     | Amethopterin (R,S)                   | FASUDIL HCl                   |              | Carmofur                     |                             |
| 3-AMINO-beta-PINENE                                                                        | Amfepramone hydrochloride            | FLAVOPIRIDOL                  |              | Carmustine                   |                             |
| 3beta-ACETOXY-23-BROMO-ISOALLOSPIROST-9 (11)-ENE-12-ONE                                    | Amidopyrine                          | FLUDARABINE                   |              | CB-5083                      |                             |
| 3beta-HYDROXY-23,24-BISNORCHOL-5-ENIC ACID                                                 | Amifostine                           | FLUDARABINE PHOSPHATE         |              | CCT 137690                   |                             |
| 3beta-HYDROXYDEOXYDIHYDRODEOXYGEDUNIN                                                      | Amikacin hydrate                     | FORETINIB                     |              | CCT129202                    |                             |
| 3beta-HYDROXYISOALLOSPIROST-9(11)-ENE                                                      | Amiloride hydrochloride dihydrate    | FORMESTANE                    |              | CCT241533 (hydrochloride)    |                             |
| 3-DEOXO-3beta-HYDROXYMEXICANOLIDE 16-ENOL ETHER                                            | Aminocaproic acid                    | GDC-0941                      |              | CDK9-IN-1                    |                             |
| 3-DESHYDROXYSAAPPANOL TRIMETHYL ETHER                                                      | Aminohippuric acid                   | GEFITINIB                     |              | CDK-IN-2                     |                             |
| 3H-1,2-DITHIOLE-3-THIONE                                                                   | Aminophylline                        | GEMCITABINE HYDROCHLORIDE     |              | Cevipabulin                  |                             |
| 3-HYDROXY-4-(SUCCIN-2-YL)-CARYOLANE delta-LACTONE                                          | Aminopurine, 6-benzyl                | GOSERELIN ACETATE             |              | CGK733                       |                             |
| 3-HYDROXYCOUMARIN                                                                          | Amiodarone hydrochloride             | GSK 2118436                   |              | CHIR-124                     |                             |
| 3-HYDROXYFLAVONE                                                                           | Amiprilose hydrochloride             | GSK-1120212                   |              | CHR-6494                     |                             |
| 3-HYDROXYTYRAMINE                                                                          | Amisulpride                          | GSK-1120212 DMSO              |              | CI-994                       |                             |
| 3-ISOBUTYL-1-METHYLANTHINE (IBMX)                                                          | Amitriptyline hydrochloride          | GSK-1904529A                  |              | Ciprofibrate                 |                             |
| 3-METHOXYCATECHOL                                                                          | Amlodipine                           | GSK-2126458                   |              | Cisplatin                    |                             |
|                                                                                            | Amodiaquin dihydrochloride dihydrate | IDARUBICIN HCl                |              | Clofarabine                  |                             |
| 3-METHYLORSELLINIC ACID                                                                    |                                      |                               |              |                              |                             |
| 3-NOR-3-OPANASINSAN-6-OL                                                                   | Amoxapine                            | IDOXURIDINE                   |              | Clofibrate                   |                             |
| 3-OXOURSAN (28-13)OLIDE                                                                    | Amoxicillin                          | IMATINIB BASE                 |              | Colchicine                   |                             |
| 3-PINANONE OXIME                                                                           | Amphotericin B                       | IMATINIB MESYLATE             |              | CP-466722                    |                             |
| 4,4'-DIISOTHIOCYANOSTILBENE-2,2'-SUFONIC ACID SODIUM SALT                                  | Ampicillin trihydrate                | IRINOTECAN HCl (trihydrate)   |              | CVT-313                      |                             |
| 4,4'-DIMETHOXYDALBERGIONE                                                                  | Amprolium hydrochloride              | LAPATINIB                     |              | CW-069                       |                             |
| 4-ACETOXYPHENOL                                                                            | Amprone                              | LAPATINIB TOSYLATE            |              | CX-4945                      |                             |
| 4-HYDROXY-6-METHYLPYRAN-2-ONE                                                              | Amrinone                             | LBH-589                       |              | CX-4945 (sodium salt)        |                             |
| 4-HYDROXYANTIPYRINE                                                                        | Amyleine hydrochloride               | LENALIDOMIDE                  |              | CX-5461                      |                             |
| 4'-HYDROXYCHALCONE                                                                         | Anastrozole                          | LEUPROLIDE ACETATE            |              | Cyclophosphamide             |                             |
| 4'-HYDROXYFLAVANONE                                                                        | Androsterone                         | LOMEGUATRIB                   |              | Cytarabine                   |                             |
| 4'-METHOXYCHALCONE                                                                         | Anethole-trithione                   | LOMUSTINE                     |              | Cytidine                     |                             |
| 4-METHOXYDALBERGIONE                                                                       | Aniracetam                           | LONIDAMINE                    |              | D-64131                      |                             |
| 4'-METHOXYFLAVONE                                                                          | Antazoline hydrochloride             | LY-294002                     |              | Dacarbazine                  |                             |
| 4-METHYLDAPHNETIN                                                                          | Anthrallin                           | LY-404039                     |              | Dacinostat                   |                             |
| 4-METHYLESCULETIN                                                                          | Antimycin A                          | LY-450139                     |              | Danuserib                    |                             |
| 4-NAPHTHALIMIDOBUTYRIC ACID                                                                | Antipyrine                           | MASITINIB                     |              | Daun02                       |                             |
| 4-NONYLPHENOL                                                                              | Antipyrine, 4-hydroxy                | MDV-3100                      |              | Daunorubicin (Hydrochloride) |                             |
|                                                                                            |                                      |                               |              |                              |                             |
| 4-O-METHYLPHLORACETOPHENONE                                                                | Apramycin                            | MELPHALAN                     |              | DBeQ                         |                             |
| 5,7-DIHYDROXY-4-METHYLCOUMARIN                                                             | Aprepitant                           | MGCD-265                      |              | Decitabine                   |                             |
| 5alpha-ANDROSTAN-3,17-DIONE                                                                | Arbutin                              | MITOMYCIN C                   |              | Dinaciclib                   |                             |

| Spectrum library                                    | Prestwick library            | Sequoia library         | ENZO library | DNA damage library                       | Cayman library |
|-----------------------------------------------------|------------------------------|-------------------------|--------------|------------------------------------------|----------------|
| Salpha-CHOLESTAN-3beta-OL-6-ONE                     | Argatroban                   | MITOXANTHRONE HCl       |              | DMAT                                     |                |
| Salpha-CHOLESTANOL                                  | Aripiprazole                 | MK-0822                 |              | Doxifluridine                            |                |
| 5-CHLOROINDOLE-2-CARBOXYLIC ACID                    | Artemisinin                  | MONENSIN SODIUM         |              | Doxorubicin (hydrochloride)              |                |
| 5-FLUOROINDOLE-2-CARBOXYLIC ACID                    | Articaine hydrochloride      | MOTESANIB               |              | Droxinostat                              |                |
| 5-HYDROXY-2',4',7,8-TETRAMETHOXYFLAVONE             | Ascorbic acid                | NAFARELIN ACETATE       |              | EI1                                      |                |
| 5-HYDROXY-7-METHOXYISOFLAVONE                       | Asenapine maleate            | NEDAPLATIN              |              | Ellagic acid                             |                |
| 5-HYDROXYIMINOISOCARYOPHYLLENE                      | Astemizole                   | NELARABINE              |              | ELR510444                                |                |
| 6,2'-DIMETHOXYFLAVONE                               | Atorvastatin                 | NERATINIB               |              | ENMD-2076                                |                |
| 6,3'-DIMETHOXYFLAVONE                               | Atovaquone                   | NILOTINIB               |              | ENMD-2076 (Tartrate)                     |                |
| 6,4'-DIHYDROXYFLAVONE                               | Atractyloside potassium salt | NILOTINIB HCl           |              | Entinostat                               |                |
| 6,7,2',3',4'-PENTAMETHOXYISOFLAVONE                 | Atracurium besylate          | NIMUSTINE HCl           |              | Epirubicin (hydrochloride)               |                |
| 6,7-DICHLORO-3-HYDROXY-2-QUINOXALINECARBOXYLIC ACID | Atropine sulfate monohydrate | NOLATREXED 2HCl         |              | Epothilone B                             |                |
| 6alpha-METHYLPREDNISOLONE ACETATE                   | Auranofin                    | NVP-BE2235              |              | Epothilone D                             |                |
| 6-AMINONICOTINAMIDE                                 | Avermectin B1a               | NVP-BGJ398              |              | EPZ004777                                |                |
| 6-HYDROXYFLAVONE                                    | Azacyclonol                  | NVP-TAE684              |              | EPZ011989                                |                |
| 7,2'-DIHYDROXYFLAVONE                               | Azacytidine-5                | OG-BENZYLGUANINE        |              | EPZ-5676                                 |                |
| 7,3'-DIMETHOXYFLAVONE                               | Azaguanine-8                 | OLAPARIB                |              | EPZ-6438                                 |                |
| 7,4'-DIHYDROXYFLAVONE                               | Azaperone                    | OXALIPLATIN             |              | Estramustine (phosphate sodium)          |                |
| 7,4'-DIMETHOXYISOFLAVONE                            | Azapropazone                 | PACLITAXEL              |              | Etoposide                                |                |
| 7,8-DIHYDROXYFLAVONE                                | Azathioprine                 | PAZOPANIB               |              | ETP-46464                                |                |
| 7-AMINOCEPHALOSPORANIC ACID                         | Azelastine HCl               | PELITINIB               |              | EX-527                                   |                |
| 7-DEACETOXY-7-OXOKHIVORIN                           | Azithromycin                 | PEMETREXED Na           |              | Fasudil (Hydrochloride)                  |                |
| 7-DEACETYLKHIVORIN                                  | Azlocillin sodium salt       | PF-2341066 (Crizotinib) |              | Fenofibrate                              |                |
| 7-DESACETOXY-6,7-DEHYDROGEDUNIN                     | Aztreonam                    | PIRARUBICIN             |              | FH535                                    |                |
| 7-DESHYDROXYPYROGALLIN-4-CARBOXYLIC ACID            | Bacampicillin hydrochloride  | PLX-4032                |              | Flavopiridol                             |                |
| 7-HYDROXY-2'-METHOXYISOFLAVONE                      | Bacitracin                   | PONATINIB               |              | Flavopiridol (Hydrochloride)             |                |
| 7-HYDROXYFLAVONE                                    | Baclofen (R,S)               | PROCARBAZINE HCl        |              | Floxuridine                              |                |
| 7-METHOXYCHROMONE                                   | Balsalazide Sodium           | RALTITREXED             |              | Fludarabine (phosphate)                  |                |
| 7-NITROINDAZOLE                                     | Bambuterol hydrochloride     | Regorafenib             |              | Flumequine                               |                |
| 7-OXOCHOLESTERYL ACETATE                            | Beclomethasone dipropionate  | RUBITECAN               |              | Folinic acid (calcium salt pentahydrate) |                |
| 8beta-HYDROXYCARAPIN, 3,8-HEMIACETAL                | Bemegride                    | SARACATINIB             |              | Folinic acid (Calcium)                   |                |
| 8-HYDROXY-15,16-BISNOR-11-LABDEN-13-ONE             | Benazepril HCl               | SATRAPLATIN             |              | Forodesine (hydrochloride)               |                |
| 8-HYDROXYCARAPINIC ACID                             | Bendroflumethiazide          | SB-408124               |              | Fosbretabulin (disodium)                 |                |
| ABACAVIR SULFATE                                    | Benfluorex hydrochloride     | SORAFENIB TOLSYLATE     |              | Fotemustine                              |                |
| ABAMECTIN (avermectin B1a shown)                    | Benfotiamine                 | ST-836 HCl              |              | FRAX486                                  |                |
| ABIETIC ACID                                        | Benoxinate hydrochloride     | SU-11274                |              | G007-LK                                  |                |
| ABSCISIC ACID (cis,trans; +/-)                      | Benperidol                   | SUNITINIB               |              | Ganetespiib                              |                |
| ACACETIN                                            | Benserazide hydrochloride    | SUNITINIB MALATE        |              | Geldanamycin                             |                |
| ACAMPROSATE CALCIUM                                 | Benzamil hydrochloride       | TANDUTINIB              |              | Gemcitabine                              |                |
| ACARBOSE                                            | Benzathine benzylpenicillin  | TARIQUIDAR              |              | Gemcitabine (elaidate)                   |                |
| ACEBUTOLOL HYDROCHLORIDE                            | Benzbromarone                | TEGAFUR                 |              | Gemcitabine (Hydrochloride)              |                |
| ACECAINIDE HYDROCHLORIDE                            | Benzethonium chloride        | TENIPOSIDE              |              | Gemfibrozil                              |                |
| ACECLIDINE                                          | Benzocaine                   | TOK-001                 |              | Genz-644282                              |                |
| ACECLOFENAC                                         | Benzonatate                  | TOPOTECAN HCL           |              | GSK 525762A                              |                |
| ACEDAPSONE                                          | Benzthiazide                 | TOREMIFENE CITRATE      |              | GSK0660                                  |                |
| ACEDOBEN                                            | Benztropine mesylate         | TRAMETINIB              |              | GSK-1070916                              |                |
| ACEGLUTAMIDE                                        | Benzydamine hydrochloride    | TRIPTORELIN ACETATE     |              | GSK126                                   |                |
| ACEMETACIN                                          | Benzylpenicillin sodium      | VADIMEZAN               |              | GSK1324726A                              |                |
| ACENEURAMIC ACID                                    | Bephenium hydroxynaphthoate  | VALRUBICIN              |              | GSK2606414                               |                |
| ACENOCOUMAROL                                       | Bepridil hydrochloride       | VANDETANIB              |              | GSK2656157                               |                |
| ACEPROMAZINE MALEATE                                | Beta-Escin                   | VATALANIB HCl           |              | GSK269962A                               |                |
| ACESULFAME POTASSIUM                                | Betahistine mesylate         | VINBLASTINE SULFATE     |              | GSK2801                                  |                |
| ACETAMINOPHEN                                       | Betamethasone                | VINCRISTINE SULPHATE    |              | GSK343                                   |                |
| ACETAMINOSALOL                                      | Betaxolol hydrochloride      | VINDESINE SULFATE       |              | GSK3787                                  |                |
| ACETANILIDE                                         | Betazole hydrochloride       | VINORELBINE BITATRATE   |              | GSK429286A                               |                |
| ACETARSOL                                           | Bethanechol chloride         | VX-680                  |              | GSK461364                                |                |
| ACETAZOLAMIDE                                       | Bezafibrate                  | ZOSUQUIDAR              |              | GSK503                                   |                |
| ACETOHEXAMIDE                                       | Bicalutamide                 |                         |              | GSK-5959                                 |                |
| ACETOHYDROXAMIC ACID                                | Bifonazole                   |                         |              | GSK-923295                               |                |
| ACETOPHENAZINE MALEATE                              | Biotin                       |                         |              | GSK-J1                                   |                |
| ACETOSYRINGONE                                      | Biperiden hydrochloride      |                         |              | GSK-J2                                   |                |
| ACETRIAZOIC ACID                                    | Bisacodyl                    |                         |              | GSK-J4                                   |                |
| ACETYL HYMETOCHROME                                 | Bisoprolol fumarate          |                         |              | GW 501516                                |                |
| ACETYL ISOGAMBOGIC ACID                             | Bosentan                     |                         |              | GW843682X                                |                |
| ACETYLCHOLINE CHLORIDE                              | Bretylum tosylate            |                         |              | GW9662                                   |                |
| ACETYLCYSTEINE                                      | Brinzolamide                 |                         |              | Hesperadin                               |                |
| ACETYLGLUCOSAMINE                                   | Bromhexine hydrochloride     |                         |              | HMN-214                                  |                |
| ACETYL-L-LEUCINE                                    | Bromocryptine mesylate       |                         |              | Hydroxyfasudil (hydrochloride)           |                |
| ACETYLPHENYLALANINE                                 | Bromopride                   |                         |              | Hydroxyurea                              |                |
| ACEXAMIC ACID                                       | Bromperidol                  |                         |              | I-BET151                                 |                |

| Spectrum library                                 | Prestwick library             | Sequoia library | ENZO library | DNA damage library                    | Cayman library |
|--------------------------------------------------|-------------------------------|-----------------|--------------|---------------------------------------|----------------|
| ACIPIMOX                                         | Brompheniramine maleate       |                 |              | Idarubicin (hydrochloride)            |                |
| ACONITIC ACID                                    | Bucladesine sodium salt       |                 |              | Ifosfamide                            |                |
| ACONITINE                                        | Budesonide                    |                 |              | Inauhzin                              |                |
| ACRIFLAVINIUM HYDROCHLORIDE                      | Bufexamac                     |                 |              | INO-1001                              |                |
| ACRISORCIN                                       | Buflomedil hydrochloride      |                 |              | IPA-3                                 |                |
| ACTARIT                                          | Bumetanide                    |                 |              | Irinotecan (hydrochloride trihydrate) |                |
| ACTEIN                                           | Bupivacaine hydrochloride     |                 |              | Irinotecan (hydrochloride)            |                |
| ACTINONIN                                        | Bupropion hydrochloride       |                 |              | Ispinesib                             |                |
| ACTINOQUINOL SODIUM                              | Buspirone hydrochloride       |                 |              | ISRIB (trans-isomer)                  |                |
| ACYCLOVIR                                        | Busulfan                      |                 |              | JIB-04                                |                |
| ADAPALENE                                        | Butacaine                     |                 |              | JQ-1 (carboxylic acid)                |                |
| ADENINE                                          | Butalbital                    |                 |              | JW 55                                 |                |
| ADENOSINE                                        | Butamben                      |                 |              | Kenpaullone                           |                |
| ADENOSINE PHOSPHATE                              | Butenafine Hydrochloride      |                 |              | KU-55933                              |                |
| ADIPHENINE HYDROCHLORIDE                         | Butoconazole nitrate          |                 |              | KU-57788                              |                |
| ADONITOL                                         | Butylparaben                  |                 |              | KU-60019                              |                |
|                                                  | Butylscopolammonium (n-)      |                 |              |                                       |                |
| ADRENOLONE HYDROCHLORIDE                         | bromide                       |                 |              | L-165041                              |                |
| AFALANINE                                        | Caffeine                      |                 |              | L189                                  |                |
| AGARIC ACID                                      | Calcipotriene                 |                 |              | LDC000067                             |                |
| AGELASINE (stereochemistry of diterpene unknown) | Camptothecin (S,+)            |                 |              | LDN-57444                             |                |
| AGMATINE SULFATE                                 | Camylofine chlorhydrate       |                 |              | LEE011                                |                |
| AJMALINE                                         | Candesartan                   |                 |              | LEE011 (succinate)                    |                |
| AKLOMIDE                                         | Canrenoic acid potassium salt |                 |              | Levoleucovorin (Calcium)              |                |
| ALANYL-DL-LEUCINE                                | Canrenone                     |                 |              | Levomefolate (calcium)                |                |
| ALAPROCLATE                                      | Captopril                     |                 |              | Levomefolic acid                      |                |
| ALBENDAZOLE                                      | Carbachol                     |                 |              | Lexibulin                             |                |
| ALBUTEROL                                        | Carbadox                      |                 |              | LFM-A13                               |                |
| ALCLOMETAZONE                                    |                               |                 |              |                                       |                |
| DIPROPIONATE                                     | Carbamazepine                 |                 |              | LMK-235                               |                |
| ALENDRONATE SODIUM                               | Carbarsone                    |                 |              | Lomeguatrib                           |                |
| ALEURETIC ACID                                   | Carbenoxolone disodium salt   |                 |              | Lomustine                             |                |
| ALEXIDINE HYDROCHLORIDE                          | Carbetapentane citrate        |                 |              | LY2603618                             |                |
| ALFUZOSIN HYDROCHLORIDE                          | Carbidopa                     |                 |              | LY2835219                             |                |
| ALGESTONE ACETOPHENIDE                           | Carbimazole                   |                 |              | M344                                  |                |
| ALISKIREN HEMIFUMARATE                           | Carbinoxamine maleate salt    |                 |              | MC1568                                |                |
| ALIZARIN                                         | Carisoprodol                  |                 |              | Melphalan                             |                |
| ALLANTOIN                                        | Carprofen                     |                 |              | Methotrexate                          |                |
| ALLOPREGNANOLONE                                 | Carteolol hydrochloride       |                 |              | Miriplatin                            |                |
| ALLOPURINOL                                      | Carvedilol                    |                 |              | Mitomycin C                           |                |
| ALLOXAN                                          | Catharanthine                 |                 |              | Mitoxantrone (dihydrochloride)        |                |
| ALLYLSOTHIOCYANATE                               | Cefaclor hydrate              |                 |              | MK-1775                               |                |
| ALLYLTHIOUREA                                    | Cefadroxil                    |                 |              | MK-4827                               |                |
| ALMOTRIPTAN                                      | Cefazolin sodium salt         |                 |              | MK-4827 (tosylate)                    |                |
| ALOIN                                            | Cefdinir                      |                 |              | MK-5108                               |                |
| alpha-CYANO-3-HYDROXYCINNAMIC ACID               | Cefepime hydrochloride        |                 |              | ML-323                                |                |
| alpha-CYANO-4-HYDROXYCINNAMIC ACID               | Cefixime                      |                 |              | ML324                                 |                |
| alpha-HYDROXYDEOXYCHOLIC ACID                    | Cefmetazole sodium salt       |                 |              | MLN0905                               |                |
| alpha-MANGOSTIN                                  | Cefoperazone dihydrate        |                 |              | MLN8054                               |                |
| alpha-METHYL-L-TYROSINE                          | Ceforanide                    |                 |              | MM-102 (trifluoroacetate)             |                |
| alpha-TOCHOPHEROL                                | Cefotaxime sodium salt        |                 |              | MN-64                                 |                |
| alpha-TOCHOPHERYL ACETATE                        | Cefotetan                     |                 |              | Mocetinostat                          |                |
| alpha-TOXICAROL (dl)                             | Cefotiam hydrochloride        |                 |              | Mps1-IN-1                             |                |
| ALPRENOLOL                                       | Cefoxitin sodium salt         |                 |              | MS436                                 |                |
| ALRESTATIN                                       | Cefsulodin sodium salt        |                 |              | Nelarabine                            |                |
| ALTHIAZIDE                                       | Ceftazidime pentahydrate      |                 |              | NG 52                                 |                |
| ALTRENOGEST                                      | Cefuroxime sodium salt        |                 |              | NMS-1286937                           |                |
| ALTRETAMINE                                      | Celecoxib                     |                 |              | NMS-873                               |                |
| ALVERINE CITRATE                                 | Celiprolol HCl                |                 |              | Nocodazole                            |                |
| AMANTADINE HYDROCHLORIDE                         | Cephalosporanic acid, 7-amino |                 |              | NU 7026                               |                |
| AMBROXOL HYDROCHLORIDE                           | Cephalothin sodium salt       |                 |              | NU2058                                |                |
| AMCINONIDE                                       | Cetirizine dihydrochloride    |                 |              | NVP-AUY922                            |                |
| AMIFOSTINE                                       | Chenodiol                     |                 |              | NVP-HSP990                            |                |
| AMIKACIN SULFATE                                 | Chicago sky blue 6B           |                 |              | NVP-LCQ195                            |                |
| AMILORIDE HYDROCHLORIDE                          | Chlorambucil                  |                 |              | OF-1                                  |                |
| AMINACRINE                                       | Chloramphenicol               |                 |              | Olaparib                              |                |
| AMINOCAPROIC ACID                                | Chlorcyclizine hydrochloride  |                 |              | Orotic acid                           |                |
| AMINOCYCLOPROPANECARBOXYLIC ACID                 | Chlorhexidine                 |                 |              | OTX-015                               |                |
| AMINOETHOXYDIPHENYLBORANE                        | Chlormadinone acetate         |                 |              | Oxaliplatin                           |                |
| AMINOETHYLISOTHIOUREA                            | Chlormezanone                 |                 |              | Oxolinic acid                         |                |
| DIHYDROBROMIDE                                   | Chlorpyramine hydrochloride   |                 |              | P 22077                               |                |
| AMINOGLUTETHIMIDE                                | Chloroquine diphosphate       |                 |              | P005091                               |                |
| AMINOHIPPURIC ACID                               | Chlorothiazide                |                 |              | Paclitaxel                            |                |
| AMINOHYDROXYBUTYRIC ACID                         |                               |                 |              |                                       |                |
| AMINOLEVULINIC ACID                              | Chlorotrianisene              |                 |              | Palbociclib                           |                |
| HYDROCHLORIDE                                    | Chloroxine                    |                 |              | Palbociclib (hydrochloride)           |                |
| AMINOPENTAMIDE SULFATE                           | Chlorpheniramine maleate      |                 |              | Palbociclib (isethionate)             |                |
| AMINOPTERIN                                      | Chlorphensin carbamate        |                 |              | Palifosfamide                         |                |
| AMINOPYRINE                                      | Chlorpromazine hydrochloride  |                 |              | Panobinostat                          |                |
| AMINOSALICYLATE SODIUM                           | Chlorpropamide                |                 |              | Parthenolide                          |                |
| AMINOTHIAZOLE                                    |                               |                 |              |                                       |                |

| Spectrum library             | Prestwick library                       | Sequoia library | ENZO library | DNA damage library                                | Cayman library |
|------------------------------|-----------------------------------------|-----------------|--------------|---------------------------------------------------|----------------|
| AMIODARONE HYDROCHLORIDE     | Chlorprothixene hydrochloride           |                 |              | PCI-24781                                         |                |
| AMISULPRIDE                  | Chlortetracycline hydrochloride         |                 |              | Pemetrexed (disodium hemipenta hydrate) (1:2:2.5) |                |
| AMITRAZ                      | Chlorthalidone                          |                 |              | Pemetrexed (disodium)                             |                |
| AMITRIPTYLINE                |                                         |                 |              |                                                   |                |
| HYDROCHLORIDE                | Chlorzoxazone                           |                 |              | PF-03814735                                       |                |
| AMLEXANOX                    | Ciclopirox ethanalamine                 |                 |              | PF-3758309                                        |                |
| AMLODIPINE BESYLATE          | Cilnidipine                             |                 |              | PFI-1                                             |                |
| AMMONIUM LACTATE             | Cilostazol                              |                 |              | PFI-2 (hydrochloride)                             |                |
| AMODIAQUINE                  |                                         |                 |              |                                                   |                |
| DIHYDROCHLORIDE              | Cimetidine                              |                 |              | PFI-4                                             |                |
| AMOROLFINE HYDROCHLORIDE     | Cinnarizine                             |                 |              | PHA-767491 (hydrochloride)                        |                |
| AMOXAPINE                    | Cinoxacin                               |                 |              | PHA-793887                                        |                |
| AMOXICILLIN                  | Ciprofibrate                            |                 |              | PHA-848125                                        |                |
|                              | Ciprofloxacin hydrochloride monohydrate |                 |              |                                                   |                |
| AMPHOTERICIN B               | Cisapride                               |                 |              | PIK-75                                            |                |
| AMPICILLIN SODIUM            |                                         |                 |              | Pimelic Diphenylamide 106                         |                |
|                              |                                         |                 |              | Pimelic Diphenylamide 106 (analog)                |                |
| AMPIROXICAM                  | Citalopram Hydrobromide                 |                 |              | Pioglitazone (hydrochloride)                      |                |
| AMPROLIUM                    | Cladribine                              |                 |              | Pirarubicin (Hydrochloride)                       |                |
| AMPYZINE SULFATE             | Clarithromycin                          |                 |              | PJ34 (hydrochloride)                              |                |
| AMSACRINE                    | Clavulanate potassium salt              |                 |              | Podophyllotoxin                                   |                |
| AMYGDALIN                    | Clebopride maleate                      |                 |              | Poloxin                                           |                |
| AMYLENE HYDRATE              | Clemastine fumarate                     |                 |              |                                                   |                |
| ANABASAMINE                  |                                         |                 |              |                                                   |                |
| HYDROCHLORIDE                | Clemizole hydrochloride                 |                 |              | PR-619                                            |                |
| ANABASINE HYDROCHLORIDE      | Clenbuterol hydrochloride               |                 |              | Pracinostat                                       |                |
| ANAGRELIDE HYDROCHLORIDE     | Clidinium bromide                       |                 |              | Pralatrexate                                      |                |
| ANASTROZOLE                  | Clinafloxacin                           |                 |              | PRT4165                                           |                |
| ANCITABINE HYDROCHLORIDE     | Clindamycin hydrochloride               |                 |              | Purvalanol A                                      |                |
| ANDROGRAPHOLIDE              | Clioquinol                              |                 |              | Purvalanol B                                      |                |
| ANDROSTA-1,4-DIEN-3,17-DIONE |                                         |                 |              |                                                   |                |
| ANDROSTERONE                 | Clobetasol propionate                   |                 |              | PU-WS13                                           |                |
| ANDROSTERONE ACETATE         | Clobutinol hydrochloride                |                 |              | PYR-41                                            |                |
| ANETHOLE                     | Clocortolone pivalate                   |                 |              | Pyridostatin (hydrochloride)                      |                |
| ANGOLENSIN (R)               | Clodronate                              |                 |              | Pyrimethamine                                     |                |
| ANHIDROBRAZILIC ACID         | Clofazimine                             |                 |              | PYZD-4409                                         |                |
| ANIRACETAM                   | Clofibrate                              |                 |              | Remodelin (hydrobromide)                          |                |
| ANISINDIONE                  | Clofibric acid                          |                 |              | Resminostat (hydrochloride)                       |                |
|                              | Clofilium tosylate                      |                 |              | Reversine                                         |                |
| ANISODAMINE HYDROBROMIDE     | Clomiphene citrate (Z,E)                |                 |              | RG108                                             |                |
| ANTAZOLINE PHOSPHATE         | Clomipramine hydrochloride              |                 |              | RG2833                                            |                |
| ANTHOTHECOL                  | Clonidine hydrochloride                 |                 |              | RGFP966                                           |                |
| ANTHRALIN                    | Clonixin Lysinate                       |                 |              | Rigosertib (sodium)                               |                |
| ANTHRAQUINONE                | Clopamide                               |                 |              | RITA                                              |                |
| ANTIAROL                     | Cloperastine hydrochloride              |                 |              | RKI-1447                                          |                |
| ANTIMONY POTASSIUM           |                                         |                 |              |                                                   |                |
| TARTRATE TRIHYDRATE          | Clorgyline hydrochloride                |                 |              | Ro3280                                            |                |
| ANTIMYCIN A (A1 shown)       | Clorsulon                               |                 |              | Ro-3306                                           |                |
| ANTIPYRINE                   | Closantel                               |                 |              | Roscovitine                                       |                |
| APHYLIC ACID                 | Clotrimazole                            |                 |              | Rosiglitazone                                     |                |
| APIGENIN                     | Cloxacillin sodium salt                 |                 |              | Rosiglitazone (maleate)                           |                |
| APIGENIN DIMETHYL ETHER      | Clozapine                               |                 |              | Rucaparib (phosphate)                             |                |
| APIOLE                       | Colchicine                              |                 |              | RVX-208                                           |                |
| APOMORPHINE                  |                                         |                 |              |                                                   |                |
| HYDROCHLORIDE                | Colistin sulfate                        |                 |              | SB1317                                            |                |
| APOTOXICAROL                 | Corticosterone                          |                 |              | SB-743921                                         |                |
| APRAMYCIN SULFATE            | Cortisol acetate                        |                 |              | SBE13 (Hydrochloride)                             |                |
| ARABITOL                     | Cortisone                               |                 |              | SCR7                                              |                |
| ARBUTIN                      | Cromolyn disodium salt                  |                 |              | Scriptaid                                         |                |
| ARECOLINE HYDROBROMIDE       | Crotamiton                              |                 |              | SGC0946                                           |                |
| ARGININE HYDROCHLORIDE       | Cyanocobalamin                          |                 |              | SGC707                                            |                |
| ARIPRAZOLE                   | Cyclizine hydrochloride                 |                 |              | SGI-1027                                          |                |
| ARISTOLOCHIC ACID            | Cyclobenzaprine hydrochloride           |                 |              | Sirtinol                                          |                |
| ARMODAFINIL                  | Cycloheximide                           |                 |              | SJB2-043                                          |                |
| ARSANILIC ACID               | Cyclopenthiiazide                       |                 |              | SLx-2119                                          |                |
| ARSENIC TRIOXIDE             | Cyclopentolate hydrochloride            |                 |              | SN-38                                             |                |
| ARTEMISININ                  | Cyclophosphamide                        |                 |              | SNS-032                                           |                |
| ARTENIMOL                    | Cyclosporin A                           |                 |              | SNS-314                                           |                |
| ARTESUNATE                   | Cyproheptadine hydrochloride            |                 |              | Sodium Butyrate                                   |                |
| ARTHONIOIC ACID              | Cyproterone acetate                     |                 |              | Sodium phenylbutyrate                             |                |
| ASARYLALDEHYDE               | Cytarabine                              |                 |              | SP2509                                            |                |
| ASCORBIC ACID                | Dacarbazine                             |                 |              | SR-3677                                           |                |
| ASCORBYL PALMITATE           | Danazol                                 |                 |              | SRT 1720 (Hydrochloride)                          |                |
| ASIATIC ACID                 | Dantrolene sodium salt                  |                 |              | SRT 2104                                          |                |
| ASPARTAME                    | Dapsone                                 |                 |              | Streptozocin                                      |                |
| ASPIRIN                      | Darifenacin hydrobromide                |                 |              | SU9516                                            |                |
| ASTAXANTHIN                  | Daunorubicin hydrochloride              |                 |              | T0070907                                          |                |
| ASTEMIZOLE                   | D-cycloserine                           |                 |              | TAK-901                                           |                |
| ASTRAGALOSIDE IV             | Debrisoquin sulfate                     |                 |              | TAK-960                                           |                |
| ATENOLOL                     | Decamethonium bromide                   |                 |              | TAME                                              |                |
| ATOMOXETINE                  |                                         |                 |              |                                                   |                |
| HYDROCHLORIDE                | Deferoxamine mesylate                   |                 |              | TAS-103 (dihydrochloride)                         |                |
| ATORVASTATIN CALCIUM         | Deflazacort                             |                 |              | TBB                                               |                |
| ATOVAQUONE                   | Dehydrocholic acid                      |                 |              | Tegafur                                           |                |
|                              | Dehydroisoandrosterone 3-acetate        |                 |              |                                                   |                |
| ATRACURIUM BESYLATE          | Demecarium bromide                      |                 |              | Temozolomide                                      |                |
| ATRANORIN                    |                                         |                 |              | Teniposide                                        |                |

| Spectrum library                 | Prestwick library                 | Sequoia library | ENZO library | DNA damage library           | Cayman library |
|----------------------------------|-----------------------------------|-----------------|--------------|------------------------------|----------------|
| ATROPINE OXIDE                   | Demeclocycline hydrochloride      |                 |              | Tenovin-1                    |                |
| ATROPINE SULFATE                 | Denatonium benzoate               |                 |              | Teprenone                    |                |
| AURAPTENE                        | Deoxycorticosterone               |                 |              | TG003                        |                |
| AURIN TRICARBOXYLIC ACID         | Deptropine citrate                |                 |              | TG101209                     |                |
| AVERMECTIN A1a                   | Dequalinium dichloride            |                 |              | TG-101348                    |                |
| AVOBENZONE                       | Desipramine hydrochloride         |                 |              | TH287                        |                |
| AVOCADENE                        | Desloratadine                     |                 |              | TH588                        |                |
| AVOCADENE ACETATE                | Dexamethasone acetate             |                 |              | Thiazovivin                  |                |
| AVOCADENOFURAN                   | Dexfenfluramine hydrochloride     |                 |              | Thio-TEPA                    |                |
|                                  | Dextromethorphan                  |                 |              |                              |                |
| AVOCADYNE ACETATE                | hydrobromide monohydrate          |                 |              | THZ1                         |                |
| AVOCADYNOFURAN                   | Diacerein                         |                 |              | THZ1 (Hydrochloride)         |                |
| AVOCATIN A                       | Diazoxide                         |                 |              | Tipiracil (hydrochloride)    |                |
| AVOCATIN B                       | Dibenzepine hydrochloride         |                 |              | Topotecan (Hydrochloride)    |                |
| AZACITIDINE                      | Dibucaine                         |                 |              | Tozasertib                   |                |
| AZADIRACTIN                      | Dichlorphenamide                  |                 |              | Treosulfan                   |                |
| AZAPERONE                        | Diclazuril                        |                 |              | Triapine                     |                |
| AZASERINE                        | Diclofenac sodium                 |                 |              | Trichostatin A               |                |
| AZATADINE MALEATE                | Dicloxacillin sodium salt hydrate |                 |              | Triciribine                  |                |
| AZATHIOPRINE                     | Dicumarol                         |                 |              | Triclabendazole              |                |
| AZELAIC ACID                     | Dicyclomine hydrochloride         |                 |              | Trifluorothymidine           |                |
| AZELASTINE HYDROCHLORIDE         | Didanosine                        |                 |              | Trimethoprim                 |                |
| AZILSARTAN KAMEDOXOMIL           | Dienestrol                        |                 |              | Troglitazone                 |                |
| AZITHROMYCIN                     | Diethylcarbamazine citrate        |                 |              | TTP 22                       |                |
| AZLOCILLIN SODIUM                | Diethylstilbestrol                |                 |              | Tubastatin A (Hydrochloride) |                |
| AZOBENZENE                       | Diflorasone Diacetate             |                 |              | Tubastatin-A                 |                |
| BACAMPICILLIN                    |                                   |                 |              |                              |                |
| HYDROCHLORIDE                    | Diflunisal                        |                 |              | TZ9                          |                |
| BACCATIN III                     | Digitoxigenin                     |                 |              | UF010                        |                |
| BACITRACIN                       | Digoxigenin                       |                 |              | UNC 0631                     |                |
| BACLOFEN                         | Digoxin                           |                 |              | UNC 669                      |                |
| BAICALEIN                        | Dihydroergotamine tartrate        |                 |              | UNC0379                      |                |
| BAICALIN                         | Dihydrostreptomycin sulfate       |                 |              | UNC0642                      |                |
| BALSALAZIDE DISODIUM             | Dilazep dihydrochloride           |                 |              | UNC1215                      |                |
|                                  |                                   |                 |              |                              |                |
| BAMBUTEROL HYDROCHLORIDE         | Diloxanide furoate                |                 |              | UNC1999                      |                |
| BARBITAL                         | Diltiazem hydrochloride           |                 |              | UPF 1069                     |                |
| BATYL ALCOHOL                    | Dimaprit dihydrochloride          |                 |              | Uramustine                   |                |
| BECLAMIDE                        | Dimenhydrinate                    |                 |              | Valproic acid (sodium salt)  |                |
| BECLOMETHASONE                   |                                   |                 |              |                              |                |
| DIPROPIONATE                     | Dimethadione                      |                 |              | VE-821                       |                |
| BEKANAMYCIN SULFATE              | Dimethisoquin hydrochloride       |                 |              | VE-822                       |                |
| BEMOTRIZINOL                     | Dinoprost trometamol              |                 |              | Veliparib (dihydrochloride)  |                |
| BENZAEPRIIL HYDROCHLORIDE        | Diosmin                           |                 |              | VER-155008                   |                |
| BENDROFLUMETHIAZIDE              | Dioxybenzone                      |                 |              | Vidarabine                   |                |
| BENFLUOREX HYDROCHLORIDE         | Diperodon hydrochloride           |                 |              | Vinblastine                  |                |
| BENFOTIAMINE                     | Diphepanil methylsulfate          |                 |              | Vinblastine (sulfate)        |                |
|                                  |                                   |                 |              |                              |                |
| BENOXINATE HYDROCHLORIDE         | Diphenhydramine hydrochloride     |                 |              | Vincristine (sulfate)        |                |
| BENSERAZIDE HYDROCHLORIDE        | Diphenidol hydrochloride          |                 |              | Vinflunine (Tartrate)        |                |
| BENURESTAT                       | Diphenylpyraline hydrochloride    |                 |              | Volasertib                   |                |
| BENZALKONIUM CHLORIDE            | Dipivefrin hydrochloride          |                 |              | Vorinostat                   |                |
| BENZBROMARONE                    | Diprophylline                     |                 |              | WAY-262611                   |                |
| BENZETHONIUM CHLORIDE            | Dipyridamole                      |                 |              | WDR5-0103                    |                |
| BENZOCAINE                       | Dipyrrone                         |                 |              | WIKI4                        |                |
| BENZOCOLIDINE                    | Dirithromycin                     |                 |              | Wortmannin                   |                |
| BENZOIC ACID                     | Disopyramide                      |                 |              | WP1130                       |                |
| BENZONATATE                      | Disulfiram                        |                 |              | Wy-14643                     |                |
| BENZOXIQUINE                     | Dizocilpine maleate               |                 |              | XAV-939                      |                |
| BENZOYL PEROXIDE                 | DO 897/99                         |                 |              | XL228                        |                |
| BENZOYLPAS                       | Dobutamine hydrochloride          |                 |              | XL413 (hydrochloride)        |                |
| BENZTHIAZIDE                     | Docetaxel                         |                 |              | Y-27632 (dihydrochloride)    |                |
| BENZYDAMINE                      |                                   |                 |              |                              |                |
| HYDROCHLORIDE                    | Dolasetron mesilate               |                 |              | Zebularine                   |                |
| BENZYL ALCOHOL                   | Domperidone                       |                 |              | ZLN005                       |                |
| BENZYL BENZOATE                  | Dopamine hydrochloride            |                 |              | ZM-447439                    |                |
| BENZYL ISOTHIOCYANATE            | Dorzolamide hydrochloride         |                 |              | β-Lapachone                  |                |
| BENZYLHYDRAZINE                  |                                   |                 |              |                              |                |
| HYDROCHLORIDE                    | Dosulepin hydrochloride           |                 |              |                              |                |
| BEPHENIUM                        |                                   |                 |              |                              |                |
| HYDROXYNAPHTHOATE                | Doxazosin mesylate                |                 |              |                              |                |
| BEPRIDIL HYDROCHLORIDE           | Doxepin hydrochloride             |                 |              |                              |                |
| BERBAMINE HYDROCHLORIDE          | Doxofylline                       |                 |              |                              |                |
| BERBERINE CHLORIDE               | Doxorubicin hydrochloride         |                 |              |                              |                |
| BERGAPTEN                        | Doxycycline hydrochloride         |                 |              |                              |                |
| BERGEMIN                         | Doxylamine succinate              |                 |              |                              |                |
| beta-AMYRIN                      | Drofenine hydrochloride           |                 |              |                              |                |
| beta-AMYRIN ACETATE              | Droperidol                        |                 |              |                              |                |
| beta-CAROTENE                    | Dropropizine (R,S)                |                 |              |                              |                |
|                                  |                                   |                 |              |                              |                |
| beta-CARYOPHYLLENE ALCOHOL       | Dyclonine hydrochloride           |                 |              |                              |                |
| beta-ESCIN                       | Dydrogesterone                    |                 |              |                              |                |
| BETAHISTINE HYDROCHLORIDE        | Ebselen                           |                 |              |                              |                |
| BETAINE HYDROCHLORIDE            | Eburnamonine (-)                  |                 |              |                              |                |
| BETAMETHASONE                    | Econazole nitrate                 |                 |              |                              |                |
| BETAMETHASONE 17,21-DIPROPIONATE | Edrophonium chloride              |                 |              |                              |                |
| BETAMETHASONE ACETATE            | Efavirenz                         |                 |              |                              |                |
| BETAMETHASONE SODIUM PHOSPHATE   | Emedastine                        |                 |              |                              |                |

| Spectrum library               | Prestwick library                 | Sequoia library | ENZO library | DNA damage library | Cayman library |
|--------------------------------|-----------------------------------|-----------------|--------------|--------------------|----------------|
| BETAMETHASONE VALERATE         | Enalapril maleate                 |                 |              |                    |                |
| BETAMIPRON                     | Enilconazole                      |                 |              |                    |                |
| beta-NAPHTHOL                  | Enoxacin                          |                 |              |                    |                |
| beta-SITOSTEROL                | Entacapone                        |                 |              |                    |                |
| BETAXALOL HYDROCHLORIDE        | Epiandrosterone                   |                 |              |                    |                |
| BETAZOLE HYDROCHLORIDE         | Epirizole                         |                 |              |                    |                |
| BETHANECHOL CHLORIDE           | Epitostanol                       |                 |              |                    |                |
| BETULIN                        | Equilin                           |                 |              |                    |                |
| BETULINIC ACID                 | Erlotinib                         |                 |              |                    |                |
| BEZAFIBRATE                    | Erythromycin                      |                 |              |                    |                |
| BICALUTAMIDE                   | Escitalopram                      |                 |              |                    |                |
| BICUCULLINE (+)                | Eserine hemisulfate salt          |                 |              |                    |                |
| BICUCULLINE(-) METHIODIDE      | Esmolol hydrochloride             |                 |              |                    |                |
| BIFONAZOLE                     | Estradiol Valerate                |                 |              |                    |                |
| BILIRUBIN                      | Estradiol-17 beta                 |                 |              |                    |                |
| BIOCHANIN A                    | Estriol                           |                 |              |                    |                |
| BIOTIN                         | Estrone                           |                 |              |                    |                |
| BIPERIDEN                      | Estropipate                       |                 |              |                    |                |
| BISABOLOL ACETATE              | Etanidazole                       |                 |              |                    |                |
| BISACODYL                      | Ethacrynic acid                   |                 |              |                    |                |
| BISANHYDRORUTILANTINONE        | Ethambutol dihydrochloride        |                 |              |                    |                |
| BISMUTH SUBSALICYLATE          | Ethamivan                         |                 |              |                    |                |
| BISOCTRIZOLE                   | Ethamsylate                       |                 |              |                    |                |
| BISOPROLOL FUMARATE            | Ethaverine hydrochloride          |                 |              |                    |                |
| BISPHENOL A                    | Ethinylestradiol                  |                 |              |                    |                |
| BISSALICYL FUMARATE            | Ethionamide                       |                 |              |                    |                |
| BITHIONATE SODIUM              | Ethisterone                       |                 |              |                    |                |
| BITOSCANATE                    | Ethopropazine hydrochloride       |                 |              |                    |                |
| BIXIN                          | Ethosuximide                      |                 |              |                    |                |
| BLEOMYCIN (bleomycin B2 shown) | Ethotoin                          |                 |              |                    |                |
| BOLDINE                        | Ethoxyquin                        |                 |              |                    |                |
| BORNYL ACETATE                 | Ethynodiol diacetate              |                 |              |                    |                |
| BOVINOCIDIN                    | Ethinylestradiol 3-methyl ether   |                 |              |                    |                |
| BRAZILEIN                      | Etidronic acid, disodium salt     |                 |              |                    |                |
| BRAZILIN                       | Etifenin                          |                 |              |                    |                |
| BRINZOLAMIDE                   | Etilefrine hydrochloride          |                 |              |                    |                |
| BROMHEXINE HYDROCHLORIDE       | Etodolac                          |                 |              |                    |                |
| BROMINDIONE                    | Etofenamate                       |                 |              |                    |                |
| BROMOCRIPTINE MESYLATE         | Etofylline                        |                 |              |                    |                |
| BROMOPRIDE                     | Etomidate                         |                 |              |                    |                |
| BROMPERIDOL                    | Etoposide                         |                 |              |                    |                |
| BROMPHENIRAMINE MALEATE        | Etoricoxib                        |                 |              |                    |                |
| BRONOPOL                       | Etretinate                        |                 |              |                    |                |
| BROXALDINE                     | Eucatropine hydrochloride         |                 |              |                    |                |
| BROXYQUINOLINE                 | Exemestane                        |                 |              |                    |                |
| BRUCINE                        | Fadrozole hydrochloride           |                 |              |                    |                |
| BUCETIN                        | Famciclovir                       |                 |              |                    |                |
| BUCLADESINE                    | Famotidine                        |                 |              |                    |                |
| BUDESONIDE                     | Famprofazone                      |                 |              |                    |                |
| BUFEXAMAC                      | Felbinac                          |                 |              |                    |                |
| BUFLOMEDIL HYDROCHLORIDE       | Felodipine                        |                 |              |                    |                |
| BUMETANIDE                     | Fenbendazole                      |                 |              |                    |                |
| BUPIVACAINE HYDROCHLORIDE      | Fenbufen                          |                 |              |                    |                |
| BUPROPION                      | Fendiline hydrochloride           |                 |              |                    |                |
| BURAMATE                       | Fenipentol                        |                 |              |                    |                |
| BUSPIRONE HYDROCHLORIDE        | Fenofibrate                       |                 |              |                    |                |
| BUSSEIN                        | Fenoprofen calcium salt dihydrate |                 |              |                    |                |
| BUSULFAN                       | Fenoterol hydrobromide            |                 |              |                    |                |
| BUTACAINE                      | Fenspiride hydrochloride          |                 |              |                    |                |
| BUTAMBEN                       | Fentiazac                         |                 |              |                    |                |
| BUTOCONAZOLE                   | Fexofenadine HCl                  |                 |              |                    |                |
| BUTYL PARABEN                  | Finasteride                       |                 |              |                    |                |
| BUTYLATED HYDROXYANISOLE       | Fipexide hydrochloride            |                 |              |                    |                |
| BUTYLATED HYDROXYTOLUENE       | Flavoxate hydrochloride           |                 |              |                    |                |
| CADAVERINE TARTRATE            | Flecainide acetate                |                 |              |                    |                |
| CADIN-4-EN-10-OL               | Fleroxacin                        |                 |              |                    |                |
| CAFFEIC ACID                   | Florfenicol                       |                 |              |                    |                |
| CAFFEINE                       | Floxuridine                       |                 |              |                    |                |
| CALCIUM GLUCEPTATE             | Flubendazol                       |                 |              |                    |                |
| CAMPHOR (1R)                   | Flucloxacillin sodium             |                 |              |                    |                |
| CAMPTOTHECIN                   | Fluconazole                       |                 |              |                    |                |
| CAMYLOFINE                     |                                   |                 |              |                    |                |
| DIHYDROCHLORIDE                | Flucytosine                       |                 |              |                    |                |
| CANAVANINE                     | Fludarabine                       |                 |              |                    |                |
| CANDESARTAN                    | Fludrocortisone acetate           |                 |              |                    |                |
| CANDESARTAN CILEXTIL           | Flufenamic acid                   |                 |              |                    |                |
| CANDICIDIN                     | Flumequine                        |                 |              |                    |                |
| CANRENOIC ACID, POTASSIUM SALT | Flumethasone                      |                 |              |                    |                |
| CANRENONE                      | Flunarizine dihydrochloride       |                 |              |                    |                |
| CANTHARIDIN                    | Flunisolide                       |                 |              |                    |                |
| CANTHAXANTHIN (euglenanone)    | Flunixin meglumine                |                 |              |                    |                |
| CAPECITABINE                   | Fluocinolone acetonide            |                 |              |                    |                |
| CAPOBENIC ACID                 | Fluocinonide                      |                 |              |                    |                |
| CAPREOMYCIN SULFATE            | Fluorometholone                   |                 |              |                    |                |
| CAPSAICIN                      | Fluoxetine hydrochloride          |                 |              |                    |                |
| CAPSANTHIN                     | Fluphenazine dihydrochloride      |                 |              |                    |                |

| Spectrum library                   | Prestwick library            | Sequoia library | ENZO library | DNA damage library | Cayman library |
|------------------------------------|------------------------------|-----------------|--------------|--------------------|----------------|
| CAPTAMINE                          | Flurandrenolide              |                 |              |                    |                |
| CAPTOPRIL                          | Flurbiprofen                 |                 |              |                    |                |
| CARAPIN                            | Fluspirilen                  |                 |              |                    |                |
| CARAPIN-8(9)-ENE                   | Flutamide                    |                 |              |                    |                |
| CARBACHOL                          | Fluticasone propionate       |                 |              |                    |                |
| CARBADOX                           | Fluvastatin sodium salt      |                 |              |                    |                |
| CARBAMAZEPINE                      | Fluvoxamine maleate          |                 |              |                    |                |
| CARBARSONE                         | Folic acid                   |                 |              |                    |                |
| CARBENICILLIN DISODIUM             | Folinic acid calcium salt    |                 |              |                    |                |
| CARBENOXOLONE SODIUM               | Fomepizole                   |                 |              |                    |                |
| CARBETAPENTANE CITRATE             | Formestane                   |                 |              |                    |                |
| CARBIDOPA                          | Formoterol fumarate          |                 |              |                    |                |
| CARBIMAZOLE                        | Fosfosal                     |                 |              |                    |                |
| CARBINOXAMINE MALEATE              | Fosinopril                   |                 |              |                    |                |
| CARBOPLATIN                        | Fulvestrant                  |                 |              |                    |                |
| CARGLUMIC ACID                     | Furaltadone hydrochloride    |                 |              |                    |                |
| CARISOPRODOL                       | Furazolidone                 |                 |              |                    |                |
| CARMINIC ACID                      | Furosemide                   |                 |              |                    |                |
| CARMOFUR                           | Fursultiamine Hydrochloride  |                 |              |                    |                |
| CARMUSTINE                         | Fusidic acid sodium salt     |                 |              |                    |                |
| CARNITINE (dl)                     |                              |                 |              |                    |                |
| HYDROCHLORIDE                      | Gabapentin                   |                 |              |                    |                |
| CARNOSINE                          | Gabazine bromide             |                 |              |                    |                |
| CARPROFEN                          | Gabexate mesilate            |                 |              |                    |                |
| CARSALAM                           | Galanthamine hydrobromide    |                 |              |                    |                |
| CARTEOLOL HYDROCHLORIDE            | Gallamine triethiodide       |                 |              |                    |                |
| CARVEDILOL                         | Ganciclovir                  |                 |              |                    |                |
| CARVEDILOL PHOSPHATE               | Gatifloxacin                 |                 |              |                    |                |
| CARYOPHYLLENE OXIDE                | GBR 12909 dihydrochloride    |                 |              |                    |                |
| CARYOPHYLLENE [t(-)]               | Gefitinib                    |                 |              |                    |                |
| CARZENIDE                          | Gemcitabine                  |                 |              |                    |                |
| CASANTHRANOL [cascaroside A shown] | Gemfibrozil                  |                 |              |                    |                |
| CATECHIN PENTAACETATE              | Gentamicine sulfate          |                 |              |                    |                |
| CATECHIN TETRAMETHYLEETHER         | Gestrinone                   |                 |              |                    |                |
| CEAROIN                            | Glafenine hydrochloride      |                 |              |                    |                |
| CEDRELONE                          | Glibenclamide                |                 |              |                    |                |
| CEDROL                             | Gliclazide                   |                 |              |                    |                |
| CEDRYL ACETATE                     | Glimepiride                  |                 |              |                    |                |
| CEFACTOR                           | Glipizide                    |                 |              |                    |                |
| CEFADROXIL                         | Gliquidone                   |                 |              |                    |                |
| CEFALONIUM                         | Glutethimide, para-amino     |                 |              |                    |                |
| CEFAMANDOLE NAFATE                 | Glycopyrrolate               |                 |              |                    |                |
| CEFAMANDOLE SODIUM                 | Granisetron                  |                 |              |                    |                |
| CEFAZOLIN SODIUM                   | Griseofulvin                 |                 |              |                    |                |
| CEFDINIR                           | Guaiaacol                    |                 |              |                    |                |
| CEFDITORIN PIVOXIL                 | Guaifenesin                  |                 |              |                    |                |
| CEFEPIME HYDROCHLORIDE             | Guanabenz acetate            |                 |              |                    |                |
| CEFMENOXIME                        |                              |                 |              |                    |                |
| HYDROCHLORIDE                      | Guanadrel sulfate            |                 |              |                    |                |
| CEFMETAZOLE SODIUM                 | Guanethidine sulfate         |                 |              |                    |                |
| CEFONICID SODIUM                   | Guanfacine hydrochloride     |                 |              |                    |                |
| CEFOPERAZONE                       | Halcinonide                  |                 |              |                    |                |
| CEFORANIDE                         | Halofantrine hydrochloride   |                 |              |                    |                |
| CEFOTAXIME SODIUM                  | Haloperidol                  |                 |              |                    |                |
| CEFOTETAN                          | Haloproglin                  |                 |              |                    |                |
| CEFOXITIN SODIUM                   | Hemicholinium bromide        |                 |              |                    |                |
| CEPIRAMIDE                         | Heptaminol hydrochloride     |                 |              |                    |                |
| CEFPODOXIME PROXETIL               | Hesperidin                   |                 |              |                    |                |
| CEFPROZIL                          | Hexachlorophene              |                 |              |                    |                |
|                                    | Hexamethonium dibromide      |                 |              |                    |                |
| CEFSULODIN SODIUM                  | dihydrate                    |                 |              |                    |                |
| CEFTAZIDIME                        | Hexestrol                    |                 |              |                    |                |
| CEFTIBUTEN                         | Hexetidine                   |                 |              |                    |                |
| CEFTIOFUR HYDROCHLORIDE            | Hexylcaine hydrochloride     |                 |              |                    |                |
| CEFTRIAXONE SODIUM                 | Homatropine hydrobromide     |                 |              |                    |                |
| TRIHYDRATE                         | (R,S)                        |                 |              |                    |                |
|                                    | Homochlorcyclizine           |                 |              |                    |                |
| CEFUROXIME AXETIL                  | dihydrochloride              |                 |              |                    |                |
| CEFUROXIME SODIUM                  | Homosalate                   |                 |              |                    |                |
| CELASTROL                          | Hycanthone                   |                 |              |                    |                |
| CELECOXIB                          | Hydralazine hydrochloride    |                 |              |                    |                |
| CELLOBIOSE (D[+])                  | Hydrochlorothiazide          |                 |              |                    |                |
| CEPHALEXIN                         | Hydrocortisone base          |                 |              |                    |                |
| CEPHALOSPORIN C SODIUM             | Hydroflumethiazide           |                 |              |                    |                |
| CEPHALOTAXINE                      | Hydroxychloroquine sulfate   |                 |              |                    |                |
| CEPHALOTHIN SODIUM                 | Hydroxytacrine maleate (R,S) |                 |              |                    |                |
| CEPHAPIRIN SODIUM                  | Hydroxyzine dihydrochloride  |                 |              |                    |                |
| CEPHARANTHINE                      | Hymecromone                  |                 |              |                    |                |
| CEPHRADINE                         | Hyoscyamine (L)              |                 |              |                    |                |
| CETIRIZINE HYDROCHLORIDE           | Ibandronate sodium           |                 |              |                    |                |
| CETRIMONIUM BROMIDE                | Ibutilast                    |                 |              |                    |                |
| CETYLPYRIDINIUM CHLORIDE           | Ibutilide fumarate           |                 |              |                    |                |
| CHAULMOOGRIC ACID                  | Idazoxan hydrochloride       |                 |              |                    |                |
| CHAULMOOGRIC ACID, ETHYL ESTER     | Idebenone                    |                 |              |                    |                |
| CHENODIOL                          | Idoxuridine                  |                 |              |                    |                |
| CHINIOFON                          | Ifenprodil tartrate          |                 |              |                    |                |
| CHLORALOSE                         | Ifosfamide                   |                 |              |                    |                |
| CHLORAMBUCIL                       | Imatinib                     |                 |              |                    |                |

| Spectrum library                | Prestwick library                                        | Sequoia library | ENZO library | DNA damage library | Cayman library |
|---------------------------------|----------------------------------------------------------|-----------------|--------------|--------------------|----------------|
| CHLORAMINE-T                    | Imidurea                                                 |                 |              |                    |                |
| CHLORAMPHENICOL                 | Imipenem                                                 |                 |              |                    |                |
| CHLORAMPHENICOL                 |                                                          |                 |              |                    |                |
| PALMITATE                       | Imipramine hydrochloride                                 |                 |              |                    |                |
| CHLORAMPHENICOL SODIUM          |                                                          |                 |              |                    |                |
| SUCCINATE                       | Imiquimod                                                |                 |              |                    |                |
| CHLORANIL                       | Indapamide                                               |                 |              |                    |                |
|                                 |                                                          |                 |              |                    |                |
| CHLORAZANIL HYDROCHLORIDE       | Indatraline hydrochloride                                |                 |              |                    |                |
| CHLORCYCLIZINE                  |                                                          |                 |              |                    |                |
| HYDROCHLORIDE                   | Indomethacin                                             |                 |              |                    |                |
| CHLORHEXIDINE                   |                                                          |                 |              |                    |                |
| DIHYDROCHLORIDE                 | Indoprofen                                               |                 |              |                    |                |
| CHLORINDANOL                    | Iobenguane sulfate                                       |                 |              |                    |                |
| CHLORINDIONE                    | Iocetamic acid                                           |                 |              |                    |                |
| CHLORMADINONE ACETATE           | Iodipamide                                               |                 |              |                    |                |
| CHLORMEZANONE                   | Iodixanol                                                |                 |              |                    |                |
| CHLORMIDAZOLE                   | Iohexol                                                  |                 |              |                    |                |
| CHLOROBUTANOL                   | Iopamidol                                                |                 |              |                    |                |
| CHLOROCRESOL                    | Iopanoic acid                                            |                 |              |                    |                |
| CHLOROGENIC ACID                | Iopromide                                                |                 |              |                    |                |
| CHLOROGUANIDE                   |                                                          |                 |              |                    |                |
| HYDROCHLORIDE                   | Ioversol                                                 |                 |              |                    |                |
| CHLOROPHYLLIDE Cu COMPLEX       |                                                          |                 |              |                    |                |
| Na SALT                         | Ioxaglic acid                                            |                 |              |                    |                |
| CHLOROPYRAMINE                  |                                                          |                 |              |                    |                |
| HYDROCHLORIDE                   | Iproniazide phosphate                                    |                 |              |                    |                |
| CHLOROQUINE DIPHOSPHATE         | Ipsapirone                                               |                 |              |                    |                |
|                                 | Irinotecan hydrochloride                                 |                 |              |                    |                |
| CHLOROTHIAZIDE                  | trihydrate                                               |                 |              |                    |                |
| CHLOROXINE                      | Irsogladine maleate                                      |                 |              |                    |                |
| CHLOROXYLENOL                   | Isocarboxazid                                            |                 |              |                    |                |
| CHLORPHENIRAMINE MALEATE        | Isoconazole                                              |                 |              |                    |                |
| CHLORPROMAZINE                  | Isoetharine mesylate salt                                |                 |              |                    |                |
| CHLORPROPAMIDE                  | Isoflupredone acetate                                    |                 |              |                    |                |
| CHLORPROTHIXENE                 |                                                          |                 |              |                    |                |
| HYDROCHLORIDE                   | Isometheptene mucate                                     |                 |              |                    |                |
| CHLORPYRIFOS                    | Isoniazid                                                |                 |              |                    |                |
| CHLORQUINALDOL                  | Isopropamide iodide                                      |                 |              |                    |                |
| CHLORTETRACYCLINE               |                                                          |                 |              |                    |                |
| HYDROCHLORIDE                   | Isopyrin hydrochloride                                   |                 |              |                    |                |
|                                 | Isoquinoline, 6,7-dimethoxy-1-methyl-1,2,3,4-tetrahydro, |                 |              |                    |                |
| CHLORTHALIDONE                  | hydrochloride                                            |                 |              |                    |                |
| CHLOROXAZONE                    | Isosorbide dinitrate                                     |                 |              |                    |                |
| CHOLECALCIFEROL                 | Isosorbide mononitrate                                   |                 |              |                    |                |
| CHOLEST-5-EN-3-ONE              | Isotretinoin                                             |                 |              |                    |                |
| CHOLESTAN-3-ONE                 | Isoxicam                                                 |                 |              |                    |                |
| CHOLESTANE                      | Isosuprine hydrochloride                                 |                 |              |                    |                |
| CHOLESTEROL                     | Isradipine                                               |                 |              |                    |                |
| CHOLESTERYL ACETATE             | Itopride                                                 |                 |              |                    |                |
| CHOLIC ACID                     | Itraconazole                                             |                 |              |                    |                |
| CHOLIC ACID, METHYL ESTER       | Ivermectin                                               |                 |              |                    |                |
| CHOLINE CHLORIDE                | Josamycin                                                |                 |              |                    |                |
| CHROMOCARB                      | Kanamycin A sulfate                                      |                 |              |                    |                |
| CHRYSANTHEMIC ACID              | Ketanserine tartrate hydrate                             |                 |              |                    |                |
| CHRYSANTHEMIC ACID, ETHYL ESTER | Ketoconazole                                             |                 |              |                    |                |
| CHRYSANTHEMYL ALCOHOL           | Ketoprofen                                               |                 |              |                    |                |
| CHRYSAROBIN                     | Ketorolac tromethamine                                   |                 |              |                    |                |
| CHRY SIN                        | Ketotifen fumarate                                       |                 |              |                    |                |
| CHRY SIN DIMETHYL ETHER         | Khellin                                                  |                 |              |                    |                |
| CHRY SOPHANOL                   | L(-)-vesamicol hydrochloride                             |                 |              |                    |                |
| CIANIDANOL                      | Labetalol hydrochloride                                  |                 |              |                    |                |
| CICLOPIROX OLAMINE              | Lacidipine                                               |                 |              |                    |                |
| CILOSTAZOL                      | Lamivudine                                               |                 |              |                    |                |
| CIMETIDINE                      | Lamotrigine                                              |                 |              |                    |                |
| CIMICIFUGOSIDE H1               | Lanatoside C                                             |                 |              |                    |                |
| CINCHONIDINE                    | Lansoprazole                                             |                 |              |                    |                |
| CINCHONINE                      | Leflunomide                                              |                 |              |                    |                |
| CINCHOPHEN                      | Letrozole                                                |                 |              |                    |                |
| CINNAMIC ACID                   | Levalbuterol hydrochloride                               |                 |              |                    |                |
| CINNARAZINE                     | Levamisole hydrochloride                                 |                 |              |                    |                |
| CINOTRAMIDE                     | Levetiracetam                                            |                 |              |                    |                |
| CINOXACIN                       | Levocabastine hydrochloride                              |                 |              |                    |                |
| CINROMIDE                       | Levodopa                                                 |                 |              |                    |                |
| CINTRIAMIDE                     | Levonordefrin                                            |                 |              |                    |                |
| CIPROFIBRATE                    | Levopropoxyphene napsylate                               |                 |              |                    |                |
| CIPROFLOXACIN                   | Lidocaine hydrochloride                                  |                 |              |                    |                |
| CISPLATIN                       | Lidoflazine                                              |                 |              |                    |                |
| CITALOPRAM HYDROBROMIDE         | Lincomycin hydrochloride                                 |                 |              |                    |                |
| CITICOLINE                      | Linezolid                                                |                 |              |                    |                |
| CITIOLONE                       | Liothyronine                                             |                 |              |                    |                |
| CITRININ                        | Liranaftate                                              |                 |              |                    |                |
| CITROPTEN                       | Lisinopril                                               |                 |              |                    |                |
| CITRULLINE                      | Lithocholic acid                                         |                 |              |                    |                |
| CLARITHROMYCIN                  | Lofexidine                                               |                 |              |                    |                |
| CLEMASTINE FUMARATE             | Lomefloxacin hydrochloride                               |                 |              |                    |                |
| CLEMIZOLE HYDROCHLORIDE         | Loperamide hydrochloride                                 |                 |              |                    |                |

| Spectrum library           | Prestwick library                  | Sequoia library | ENZO library | DNA damage library | Cayman library |
|----------------------------|------------------------------------|-----------------|--------------|--------------------|----------------|
| CLENBUTEROL HYDROCHLORIDE  | Loracarbef                         |                 |              |                    |                |
| CLIDINIUM BROMIDE          | Loratadine                         |                 |              |                    |                |
| CLIMBAZOLE                 | Lorglumide sodium salt             |                 |              |                    |                |
| CLINAFOXACIN               |                                    |                 |              |                    |                |
| HYDROCHLORIDE              | Losartan                           |                 |              |                    |                |
| CLINDAMYCIN HYDROCHLORIDE  | Lovastatin                         |                 |              |                    |                |
| CLINDAMYCIN PALMITATE      |                                    |                 |              |                    |                |
| HYDROCHLORIDE              | Loxapine succinate                 |                 |              |                    |                |
| CLIOQUINOL                 | Luteolin                           |                 |              |                    |                |
| CLOBETASOL PROPIONATE      | Lymecycline                        |                 |              |                    |                |
| CLOFARABINE                | Lynestrenol                        |                 |              |                    |                |
| CLOFAZIMINE                | Mafenide hydrochloride             |                 |              |                    |                |
| CLOFIBRATE                 | Maprotiline hydrochloride          |                 |              |                    |                |
| CLOFIBRIC ACID             | Mebendazole                        |                 |              |                    |                |
| CLOFOCTOL                  | Mebeverine hydrochloride           |                 |              |                    |                |
|                            | Mebhydroline 1,5-                  |                 |              |                    |                |
| CLOMIPHENE CITRATE         | naphtalenedisulfonate              |                 |              |                    |                |
| CLOMIPRAMINE               |                                    |                 |              |                    |                |
| HYDROCHLORIDE              | Mecamylamine hydrochloride         |                 |              |                    |                |
| CLONIDINE HYDROCHLORIDE    | Meclocycline sulfosalicylate       |                 |              |                    |                |
| CLOPERASTINE               | Meclofenamic acid sodium salt      |                 |              |                    |                |
| HYDROCHLORIDE              | monohydrate                        |                 |              |                    |                |
| CLOPIDOGREL SULFATE        | Meclofenoxate hydrochloride        |                 |              |                    |                |
| CLOPIDOL                   | Meclozine dihydrochloride          |                 |              |                    |                |
| CLOGILINE HYDROCHLORIDE    | Medrysone                          |                 |              |                    |                |
| CLORSULON                  | Mefenamic acid                     |                 |              |                    |                |
| CLOSANTEL                  | Mefexamide hydrochloride           |                 |              |                    |                |
| CLOTRIMAZOLE               | Mefloquine hydrochloride           |                 |              |                    |                |
| CLOVANEDIOL DIACETATE      | Megestrol acetate                  |                 |              |                    |                |
| CLOXACILLIN SODIUM         | Meglumine                          |                 |              |                    |                |
| CLOXYQUIN                  | Melatonin                          |                 |              |                    |                |
| CLOZAPINE                  | Melengestrol acetate               |                 |              |                    |                |
| COLCHICEINE                | Meloxicam                          |                 |              |                    |                |
| COLCHICINE                 | Memantine Hydrochloride            |                 |              |                    |                |
| COLESEVALAM                |                                    |                 |              |                    |                |
| HYDROCHLORIDE (high mol wt |                                    |                 |              |                    |                |
| copolymer @10mg/ml)        | Mepenzolate bromide                |                 |              |                    |                |
| COLFORSIN                  | Mephenesin                         |                 |              |                    |                |
| COLISTIMETHATE SODIUM      | Mephentermine hemisulfate          |                 |              |                    |                |
| COLISTIN SULFATE           | Mephenytoin                        |                 |              |                    |                |
| CONESSINE                  | Mepivacaine hydrochloride          |                 |              |                    |                |
| CONVALLATOXIN              | Meprylcaine hydrochloride          |                 |              |                    |                |
| CORALYNE CHLORIDE          | Meptazinol hydrochloride           |                 |              |                    |                |
| CORTISONE                  | Merbromin                          |                 |              |                    |                |
| CORTISONE ACETATE          | Mercaptopurine                     |                 |              |                    |                |
| CORYNANTHINE               | Meropenem                          |                 |              |                    |                |
| COTARNINE CHLORIDE         | Mesalamine                         |                 |              |                    |                |
| COTININE                   | Mesna                              |                 |              |                    |                |
| COUMARIN                   | Mesoridazine besylate              |                 |              |                    |                |
|                            | Metaproterenol sulfate,            |                 |              |                    |                |
| COUMOPHOS                  | orciprenaline sulfate              |                 |              |                    |                |
| CREATININE                 | Metaraminol bitartrate             |                 |              |                    |                |
| CRESOL                     | Metergoline                        |                 |              |                    |                |
| CRESOPIRINE                | Metformin hydrochloride            |                 |              |                    |                |
| CROMOLYN SODIUM            | Methacholine chloride              |                 |              |                    |                |
| CROTAMITON                 | Methacycline hydrochloride         |                 |              |                    |                |
| CRUSTECDYSONE              | Methantheline bromide              |                 |              |                    |                |
| CRYOFLURANE                | Methapyrilene hydrochloride        |                 |              |                    |                |
| CRYPTOTANSHINONE           | Methazolamide                      |                 |              |                    |                |
| CULMORIN                   | Methenamine                        |                 |              |                    |                |
| CURCUMIN                   | Methiazole                         |                 |              |                    |                |
| CYACETACIDE                | Methimazole                        |                 |              |                    |                |
| CYANOCOBALAMIN             | Methiothepin maleate               |                 |              |                    |                |
| CYCLAMIC ACID              | Methocarbamol                      |                 |              |                    |                |
| CYCLANDELATE               | Methotrexate                       |                 |              |                    |                |
| CYCLIZINE                  | Methotrimeprazine maleat salt      |                 |              |                    |                |
| CYCLOBENZAPRINE            |                                    |                 |              |                    |                |
| HYDROCHLORIDE              | Methoxamine hydrochloride          |                 |              |                    |                |
| CYCLOHEXIMIDE              | Methyl benzethonium chloride       |                 |              |                    |                |
| CYCLOEUCINE                | Methylatropine nitrate             |                 |              |                    |                |
| CYCLOPENTOLATE             |                                    |                 |              |                    |                |
| HYDROCHLORIDE              | Methyldopa (L,-)                   |                 |              |                    |                |
| CYCLOPHOSPHAMIDE           | Methyldopate hydrochloride         |                 |              |                    |                |
| CYCLOSERINE (D)            | Methylergometrine maleate          |                 |              |                    |                |
| CYCLOSPORINE               | Methylhydantoin-5-(D)              |                 |              |                    |                |
| CYCLOTHIAZIDE              | Methylhydantoin-5-(L)              |                 |              |                    |                |
| CYCLOVERATRYLENE           | Methylprednisolone, 6-alpha        |                 |              |                    |                |
| CYPERMETHRIN               | Metricrane                         |                 |              |                    |                |
| CYPROHEPTADINE             |                                    |                 |              |                    |                |
| HYDROCHLORIDE              | Metixene hydrochloride             |                 |              |                    |                |
|                            | Metoclopramide                     |                 |              |                    |                |
| CYPROTERONE                | monohydrochloride                  |                 |              |                    |                |
| CYPROTERONE ACETATE        | Metolazone                         |                 |              |                    |                |
| CYROMAZINE                 | Metoprolol-(+,-) (+)-tartrate salt |                 |              |                    |                |
| CYSTAMINE DIHYDROCHLORIDE  | Metrizamide                        |                 |              |                    |                |
| CYSTEAMINE HYDROCHLORIDE   | Metronidazole                      |                 |              |                    |                |
| CYTARABINE                 | Metyrapone                         |                 |              |                    |                |
| CYTIDINE                   | Mevalonic-D, L acid lactone        |                 |              |                    |                |

| Spectrum library                            | Prestwick library                                                         | Sequoia library | ENZO library | DNA damage library | Cayman library |
|---------------------------------------------|---------------------------------------------------------------------------|-----------------|--------------|--------------------|----------------|
| CYTISINE                                    | Mevastatin                                                                |                 |              |                    |                |
| D-(+)-MALTOSE                               | Mexiletine hydrochloride                                                  |                 |              |                    |                |
| d,l-threo-3-HYDROXYASPARTIC ACID            | Mianserine hydrochloride                                                  |                 |              |                    |                |
| DABIGATRAN ETEXILATE                        |                                                                           |                 |              |                    |                |
| MESYLATE                                    | Miconazole                                                                |                 |              |                    |                |
| DACARBAZINE                                 | Midodrine hydrochloride                                                   |                 |              |                    |                |
| DACTINOMYCIN                                | Mifepristone                                                              |                 |              |                    |                |
| DAIDZEIN                                    | Miglitol                                                                  |                 |              |                    |                |
| DALBERGIONE                                 | Milrinone                                                                 |                 |              |                    |                |
| DALBERGIONE, 4-METHOXY-4'-HYDROXY-          |                                                                           |                 |              |                    |                |
| DANAZOL                                     | Minaprine dihydrochloride                                                 |                 |              |                    |                |
| DANTHRON                                    | Minocycline hydrochloride                                                 |                 |              |                    |                |
| DANTROLENE SODIUM                           | Minoxidil                                                                 |                 |              |                    |                |
| DAPSONE                                     | Mirtazapine                                                               |                 |              |                    |                |
| DAPTOMYCIN (5 millimolar/DMSO)              | Misoprostol                                                               |                 |              |                    |                |
| DARIFENACIN HYDROBROMIDE                    | Mitotane                                                                  |                 |              |                    |                |
| DASATINIB                                   | Mitoxantrone dihydrochloride                                              |                 |              |                    |                |
| DAUNORUBICIN                                | Mizolastine                                                               |                 |              |                    |                |
| DEACETOXY(7)-7-OXOKHIVORINIC ACID           | Moclobemide                                                               |                 |              |                    |                |
| DEACETOXY-7-OXOGEDUNIN                      | Modafinil                                                                 |                 |              |                    |                |
| DEACETYLGEDUNIN                             | Molindone hydrochloride                                                   |                 |              |                    |                |
| DEBRISOQUIN SULFATE                         | Molsidomine                                                               |                 |              |                    |                |
| DECAMETHONIUM BROMIDE                       | Mometasone furoate                                                        |                 |              |                    |                |
| DECOQUINATE                                 | Monensin sodium salt                                                      |                 |              |                    |                |
| DEFERIPRONE                                 | Monobenzene                                                               |                 |              |                    |                |
| DEFEROXAMINE MESYLATE                       | Montelukast                                                               |                 |              |                    |                |
| DEFLAZACORT                                 | Morantel tartrate                                                         |                 |              |                    |                |
| DEGUELIN(-)                                 | Moricizine hydrochloride                                                  |                 |              |                    |                |
|                                             | Moroxidine hydrochloride                                                  |                 |              |                    |                |
| DEHYDROABIETAMIDE                           | Morpholinoethylamino-3-benzocyclohepta-(5,6-c)-pyridazine dihydrochloride |                 |              |                    |                |
| DEHYDROACETIC ACID                          | Moxalactam disodium salt                                                  |                 |              |                    |                |
| DEHYDROCHOLATE SODIUM                       | Moxifloxacin                                                              |                 |              |                    |                |
| DEHYDROCHOLIC ACID                          | Moxislyle hydrochloride                                                   |                 |              |                    |                |
| DEHYDRODIHYDROROTENONE                      | Moxonidine                                                                |                 |              |                    |                |
| DEHYDROEPIANDROSTERONE                      | N6-methyladenosine                                                        |                 |              |                    |                |
| DEHYDROROTENONE                             | Nabumetone                                                                |                 |              |                    |                |
|                                             | N-Acetyl-DL-homocysteine                                                  |                 |              |                    |                |
| DEHYDROVARIABILIN                           | Thiolactone                                                               |                 |              |                    |                |
| DEMECLOCYCLINE                              |                                                                           |                 |              |                    |                |
| HYDROCHLORIDE                               | N-Acetyl-L-leucine                                                        |                 |              |                    |                |
| DEMETHYLNIBILETIN                           | Nadide                                                                    |                 |              |                    |                |
| DENATONIUM BENZOATE                         | Nadifloxacin                                                              |                 |              |                    |                |
| DEOXYADENOSINE                              | Nadolol                                                                   |                 |              |                    |                |
|                                             | Nafcillin sodium salt monohydrate                                         |                 |              |                    |                |
| DEOXYCHOLIC ACID                            | Naftronyl oxalate                                                         |                 |              |                    |                |
| DEOXYGEDUNIN                                | Naftifine hydrochloride                                                   |                 |              |                    |                |
| DEOXYKHIVORIN                               |                                                                           |                 |              |                    |                |
| DEOXYPEGANINE                               |                                                                           |                 |              |                    |                |
| HYDROCHLORIDE                               | Naftopidil dihydrochloride                                                |                 |              |                    |                |
| DEOXSAPPANONE B 7,3'-DIMETHYL ETHER         | Nalbuphine hydrochloride                                                  |                 |              |                    |                |
| DEOXSAPPANONE B 7,3'-DIMETHYL ETHER ACETATE | Nalidixic acid sodium salt                                                |                 |              |                    |                |
| DEOXSAPPANONE B 7,4'-DIMETHYL ETHER         | Nalmefene hydrochloride                                                   |                 |              |                    |                |
| DEOXSAPPANONE B TRIMETHYL ETHER             | Naloxone hydrochloride                                                    |                 |              |                    |                |
|                                             | Naltrexone hydrochloride dihydrate                                        |                 |              |                    |                |
| DEQUALINIUM CHLORIDE                        | Nandrolone                                                                |                 |              |                    |                |
| DERACOXIB                                   | Naphazoline hydrochloride                                                 |                 |              |                    |                |
| DERRUSIN                                    | Naproxen                                                                  |                 |              |                    |                |
| DERRUSTONE                                  |                                                                           |                 |              |                    |                |
| DESACETYL (7)KHIVORINIC ACID, METHYL ESTER  | Nefazodone HCl                                                            |                 |              |                    |                |
| DESACETYLCOLFORSIN                          | Nefopam hydrochloride                                                     |                 |              |                    |                |
| DESIPRAMINE HYDROCHLORIDE                   | Neomycin sulfate                                                          |                 |              |                    |                |
| DESLORATIDINE                               | Neostigmine bromide                                                       |                 |              |                    |                |
| DESONIDE                                    | Niacin                                                                    |                 |              |                    |                |
| DESOXYCORTICOSTERONE ACETATE                | Nialamide                                                                 |                 |              |                    |                |
| DESOXYMETASONE                              | Nicardipine hydrochloride                                                 |                 |              |                    |                |
| DESVENLAFAXINE SUCCINATE                    | Nicergoline                                                               |                 |              |                    |                |
| DEXAMETHASONE                               | Niclosamide                                                               |                 |              |                    |                |
| DEXAMETHASONE ACETATE                       | Nicorandil                                                                |                 |              |                    |                |
| DEXAMETHASONE SODIUM PHOSPHATE              | Nicotinamide                                                              |                 |              |                    |                |
| DEXCHLORPHENIRAMINE MALEATE                 | Nifedipine                                                                |                 |              |                    |                |
| DEXFOSFOSERINE                              | Nifenazone                                                                |                 |              |                    |                |
| DEXIBUPROFEN                                | Niflumic acid                                                             |                 |              |                    |                |
| DEXLANSOPRAZOLE                             | Nifuroxazide                                                              |                 |              |                    |                |
| DEXPANTHENOL                                | Nifurtimox                                                                |                 |              |                    |                |
| DEXPROPRANOLOL HYDROCHLORIDE                | Nilutamide                                                                |                 |              |                    |                |

| Spectrum library            | Prestwick library             | Sequoia library | ENZO library | DNA damage library | Cayman library |
|-----------------------------|-------------------------------|-----------------|--------------|--------------------|----------------|
| DEXTROMETHORPHAN            |                               |                 |              |                    |                |
| HYDROBROMIDE                | Nilvadipine                   |                 |              |                    |                |
| DIACERIN                    | Nimesulide                    |                 |              |                    |                |
| DIACETAMATE                 | Nimodipine                    |                 |              |                    |                |
| DIALLYL SULFIDE             | Niridazole                    |                 |              |                    |                |
| DIATRIZOIC ACID             | Nisoldipine                   |                 |              |                    |                |
| DIAVERIDINE                 | Nisoxetine hydrochloride      |                 |              |                    |                |
| DIAZOXIDE                   | Nitrendipine                  |                 |              |                    |                |
| DIBEKACIN                   | Nitrocaramiphen hydrochloride |                 |              |                    |                |
| DIBENZOTHIOPHENE            | Nitrofural                    |                 |              |                    |                |
| DIBENZOYLMETHANE            | Nitrofurantoin                |                 |              |                    |                |
| DIBUCAINE HYDROCHLORIDE     | Nizatidine                    |                 |              |                    |                |
| DIBUTYL PHTHALATE           | Nocodazole                    |                 |              |                    |                |
| DICHLORISONE ACETATE        | Nomegestrol acetate           |                 |              |                    |                |
| DICHLOROPHEN                | Nomifensine maleate           |                 |              |                    |                |
| DICHLORVOS                  | Norcyclobenzaprine            |                 |              |                    |                |
| DICLAZURIL                  | Norethindrone                 |                 |              |                    |                |
| DICLOFENAC SODIUM           | Norethynodrel                 |                 |              |                    |                |
| DICLORALUREA                | Norfloxacin                   |                 |              |                    |                |
| DICLOXACILLIN SODIUM        | Norgestimate                  |                 |              |                    |                |
| DICTAMNINE                  | Norgestrel(-)-D               |                 |              |                    |                |
| DICUMAROL                   | Nortriptyline hydrochloride   |                 |              |                    |                |
| DICYCLOMINE HYDROCHLORIDE   | Novobiocin sodium salt        |                 |              |                    |                |
| DIDEACETYL (1,3)-7-         |                               |                 |              |                    |                |
| DESACETOXY-7-OXO-           |                               |                 |              |                    |                |
| DEOXYKHIVORINIC ACID        | Nylidrin                      |                 |              |                    |                |
| DIENESTROL                  | Nystatine                     |                 |              |                    |                |
| DIETHYLCARBAMAZINE CITRATE  | Ofloxacin                     |                 |              |                    |                |
| DIETHYLSTILBESTROL          | Olanzapine                    |                 |              |                    |                |
| DIETHYLTOLUAMIDE            | Olmesartan                    |                 |              |                    |                |
| DIFFRACTAIC ACID            | Olopatadine hydrochloride     |                 |              |                    |                |
| DIFLORASONE DIACETATE       | Omeprazole                    |                 |              |                    |                |
| DIFLOXACIN HYDROCHLORIDE    | Ondansetron Hydrochloride     |                 |              |                    |                |
| DIFLUBENZURON               | Opipramol dihydrochloride     |                 |              |                    |                |
| DIFLUNISAL                  | Ornidazole                    |                 |              |                    |                |
| DIFUCOL HEXAMETHYL ETHER    | Orphenadrine hydrochloride    |                 |              |                    |                |
| DIGITONIN                   | Oxacillin sodium              |                 |              |                    |                |
| DIGITOXIN                   | Oxalamine citrate salt        |                 |              |                    |                |
| DIGOXIGENIN                 | Oxandrolone                   |                 |              |                    |                |
| DIGOXIN                     | Oxantel pamoate               |                 |              |                    |                |
| DIHYDROCELASTROL            | Oxaprozín                     |                 |              |                    |                |
| DIHYDROCELASTRYL DIACETATE  | Oxcarbazepine                 |                 |              |                    |                |
| DIHYDROERGOTAMINE           |                               |                 |              |                    |                |
| MESYLATE                    | Oxethazaine                   |                 |              |                    |                |
| DIHYDROFISSINOLIDE          | Oxfendazol                    |                 |              |                    |                |
| DIHYDROFOLIC ACID           | Oxibendazol                   |                 |              |                    |                |
| DIHYDROGAMBOGIC ACID        | Oxiconazole Nitrate           |                 |              |                    |                |
| DIHYDROGEDUNIC ACID,        |                               |                 |              |                    |                |
| METHYL ESTER                | Oxolinic acid                 |                 |              |                    |                |
| DIHYDROGEDUNIN              | Oxprenolol hydrochloride      |                 |              |                    |                |
| DIHYDROJASMONIC ACID,       |                               |                 |              |                    |                |
| METHYL ESTER                | Oxybenzone                    |                 |              |                    |                |
| DIHYDROMUNDULETONE          | Oxybutynin chloride           |                 |              |                    |                |
| DIHYDROROTENONE             | Oxymetazoline hydrochloride   |                 |              |                    |                |
| DIHYDROSTREPTOMYCIN         |                               |                 |              |                    |                |
| SULFATE                     | Oxyphenbutazone               |                 |              |                    |                |
| DIHYDROTANSHINONE I         | Oxytetracycline dihydrate     |                 |              |                    |                |
| DIHYDROXY                   |                               |                 |              |                    |                |
| (3alpha,12alpha)PREGNAN-20- |                               |                 |              |                    |                |
| ONE                         | Ozagrel hydrochloride         |                 |              |                    |                |
| DILAZEP DIHYDROCHLORIDE     | Paclitaxel                    |                 |              |                    |                |
| DILOXANIDE FUROATE          | Pancuronium bromide           |                 |              |                    |                |
| DILTIAZEM HYDROCHLORIDE     | Panthenol (D)                 |                 |              |                    |                |
| DIMENHYDRINATE              | Papaverine hydrochloride      |                 |              |                    |                |
| DIMERCAPROL                 | Parbendazole                  |                 |              |                    |                |
| DIMETHADIONE                | Pargyline hydrochloride       |                 |              |                    |                |
| DIMETHYL FUMARATE           | Paromomycin sulfate           |                 |              |                    |                |
| DIMETHYLCAFFEIC ACID        | Paroxetine Hydrochloride      |                 |              |                    |                |
| DIMETHYLSULFONE             | Parthenolide                  |                 |              |                    |                |
| DIMETRIDAZOLE               | Pefloxacin                    |                 |              |                    |                |
| DIMINAZENE ACETURATE        | Pemirolast potassium          |                 |              |                    |                |
| DIMPYLATE                   | Pempidine tartrate            |                 |              |                    |                |
| DINITOLMIDE                 | Penbutolol sulfate            |                 |              |                    |                |
| DIOSGENIN                   | Penciclovir                   |                 |              |                    |                |
| DIOSMIN                     | Penicillamine                 |                 |              |                    |                |
| DIOXYBENZONE                | Pentamidine isethionate       |                 |              |                    |                |
| DIPERODON HYDROCHLORIDE     | Pentetic acid                 |                 |              |                    |                |
| DIPHENHYDRAMINE             |                               |                 |              |                    |                |
| HYDROCHLORIDE               | Pentobarbital                 |                 |              |                    |                |
| DIPHENYLPYRALINE            |                               |                 |              |                    |                |
| HYDROCHLORIDE               | Pentolinium bitartrate        |                 |              |                    |                |
| DIPLOSALSALATE              | Pentoxifylline                |                 |              |                    |                |
| DIPTERYXIN                  | Pentylenetetrazole            |                 |              |                    |                |
| DIPYRIDAMOLE                | Pepstatin A                   |                 |              |                    |                |
| DIPYROCETYL                 | Pergolide mesylate            |                 |              |                    |                |
| DIPYRONE                    | Perhexiline maleate           |                 |              |                    |                |
| DIRITHROMYCIN               | Perindopril                   |                 |              |                    |                |
| DISOPYRAMIDE PHOSPHATE      | Perphenazine                  |                 |              |                    |                |
| DISULFIRAM                  | Phenacetin                    |                 |              |                    |                |

| Spectrum library          | Prestwick library              | Sequoia library | ENZO library | DNA damage library | Cayman library |
|---------------------------|--------------------------------|-----------------|--------------|--------------------|----------------|
| DIXANTHOGEN               | Phenazopyridine hydrochloride  |                 |              |                    |                |
| DJENKOLIC ACID            | Phenelzine sulfate             |                 |              |                    |                |
| D-LACTITOL MONOHYDRATE    | Phenethicillin potassium salt  |                 |              |                    |                |
| d-LIMONENE                | Phenformin hydrochloride       |                 |              |                    |                |
| DOBUTAMINE HYDROCHLORIDE  | Phenindione                    |                 |              |                    |                |
| DOCETAXEL                 | Pheniramine maleate            |                 |              |                    |                |
|                           | Phenoxybenzamine               |                 |              |                    |                |
| DOCONEXENT                | hydrochloride                  |                 |              |                    |                |
| DOCOSANOL                 | Phensuximide                   |                 |              |                    |                |
| DOCUSATE SODIUM           | Phentermine hydrochloride      |                 |              |                    |                |
| DOMPERIDONE               | Phentolamine hydrochloride     |                 |              |                    |                |
| DONEPEZIL HYDROCHLORIDE   | Phenylbutazone                 |                 |              |                    |                |
|                           | Phenylpropanolamine            |                 |              |                    |                |
| DOPAMINE HYDROCHLORIDE    | hydrochloride                  |                 |              |                    |                |
| DORAMECTIN                | Phthalylsulfathiazole          |                 |              |                    |                |
| DOXAPRAM HYDROCHLORIDE    | Picotamide monohydrate         |                 |              |                    |                |
| DOXAZOSIN MESYLATE        | Picrotoxinin                   |                 |              |                    |                |
| DOXEPIN HYDROCHLORIDE     | Pilocarpine nitrate            |                 |              |                    |                |
| DOXIFLURIDINE             | Pimethixene maleate            |                 |              |                    |                |
| DOXOFYLLINE               | Pimozide                       |                 |              |                    |                |
| DOXORUBICIN               | Pinacidil                      |                 |              |                    |                |
| DOXYCYCLINE HYDROCHLORIDE | Pinaverium bromide             |                 |              |                    |                |
| DOXYLAMINE SUCCINATE      | Pindolol                       |                 |              |                    |                |
| D-PHENYLALANINE           | Pioglitazone                   |                 |              |                    |                |
| DROFENINE HYDROCHLORIDE   | Pipemidic acid                 |                 |              |                    |                |
| DROPERIDOL                | Pipenzolate bromide            |                 |              |                    |                |
| DROPROPIZINE              | Piperacetazine                 |                 |              |                    |                |
| DROSPIRENONE              | Piperacillin sodium salt       |                 |              |                    |                |
| DUARTIN (-)               | Piperidolate hydrochloride     |                 |              |                    |                |
| DUARTIN, DIMETHYL ETHER   | Piracetam                      |                 |              |                    |                |
| DULOXETINE HYDROCHLORIDE  | Pirenperone                    |                 |              |                    |                |
| DUTASTERIDE               | Pirenzepine dihydrochloride    |                 |              |                    |                |
| DYCLONINE HYDROCHLORIDE   | Piretanide                     |                 |              |                    |                |
| DYCLONINE HYDROCHLORIDE   | Piribedil hydrochloride        |                 |              |                    |                |
| DYDROGESTERONE            | Pirlindole mesylate            |                 |              |                    |                |
| DYPHYLLINE                | Piromidic acid                 |                 |              |                    |                |
| EBSELEN                   | Piroxicam                      |                 |              |                    |                |
| ECAMSULE TRIETHANOLAMINE  | Pivampicillin                  |                 |              |                    |                |
| ECONAZOLE NITRATE         | Pivmecillinam hydrochloride    |                 |              |                    |                |
| EDARAVONE                 | Pizotifen malate               |                 |              |                    |                |
| EDETATE DISODIUM          | Podophyllotoxin                |                 |              |                    |                |
| EDITOL                    | Practolol                      |                 |              |                    |                |
| EDOXUDINE                 | Pralidoxime chloride           |                 |              |                    |                |
| EDROPHONIUM CHLORIDE      | Pramipexole                    |                 |              |                    |                |
| EFAROXAN HYDROCHLORIDE    | Pramoxine hydrochloride        |                 |              |                    |                |
| EFLOXATE                  | Pranlukast                     |                 |              |                    |                |
| ELAIDYLPHOSPHOCHOLINE     | Pranoprofen                    |                 |              |                    |                |
| ELETRIPTAN HYDROBROMIDE   | Pravastatin                    |                 |              |                    |                |
| ELLAGIC ACID              | Praziquantel                   |                 |              |                    |                |
| ELTANOLONE                | Prazosin hydrochloride         |                 |              |                    |                |
| EMBELIN                   | Prednicarbate                  |                 |              |                    |                |
| EMETINE DIHYDROCHLORIDE   | Prednisolone                   |                 |              |                    |                |
| EMODIN                    | Prednisone                     |                 |              |                    |                |
| ENALAPRIL MALEATE         | Pregnenolone                   |                 |              |                    |                |
| ENALAPRILAT               | Prenylamine lactate            |                 |              |                    |                |
| ENILCONAZOLE SULFATE      | Pridinol methanesulfonate salt |                 |              |                    |                |
| ENOXACIN                  | Prilocaine hydrochloride       |                 |              |                    |                |
| ENOXOLONE                 | Primaquine diphosphate         |                 |              |                    |                |
| ENROFLOXACIN              | Primidone                      |                 |              |                    |                |
| ENTACAPONE                | Proadifen hydrochloride        |                 |              |                    |                |
| ENTANDROPHRAGMIN          | Probenecid                     |                 |              |                    |                |
| EPHEDRINE (1R,2S)         |                                |                 |              |                    |                |
| HYDROCHLORIDE             | Probucol                       |                 |              |                    |                |
| EPIAFZELECHIN (2R,3R)(-)  | Procainamide hydrochloride     |                 |              |                    |                |
| EPIAFZELECHIN TRIMETHYL   |                                |                 |              |                    |                |
| ETHER                     | Procaine hydrochloride         |                 |              |                    |                |
| EPIANDROSTERONE           | Procarbazine hydrochloride     |                 |              |                    |                |
| EPICATECHIN               | Prochlorperazine dimaleate     |                 |              |                    |                |
| EPICATECHIN MONOGALLATE   | Procyclidine hydrochloride     |                 |              |                    |                |
| EPICATECHIN PENTAACETATE  | Progesterone                   |                 |              |                    |                |
| EPIESTRIOL                | Progumide                      |                 |              |                    |                |
| EPIGALLOCATECHIN          | Proguanil hydrochloride        |                 |              |                    |                |
| EPIGALLOCATECHIN 3,5-     |                                |                 |              |                    |                |
| DIGALLATE                 | Promazine hydrochloride        |                 |              |                    |                |
| EPIGALLOCATECHIN-3-       |                                |                 |              |                    |                |
| MONOGALLATE               | Promethazine hydrochloride     |                 |              |                    |                |
| EPINEPHRINE BITARTRATE    | Pronethalol hydrochloride      |                 |              |                    |                |
| EPIRUBICIN HYDROCHLORIDE  | Propafenone hydrochloride      |                 |              |                    |                |
| EPOXY (4,5alpha)-4,5-     |                                |                 |              |                    |                |
| DIHYDROSANTONIN           | Propantheline bromide          |                 |              |                    |                |
| EPOXYGEDUNIN              | Proparacaine hydrochloride     |                 |              |                    |                |
| EPRINOMECTIN              | Propidium iodide               |                 |              |                    |                |
| EPROBEMIDE                | Propofol                       |                 |              |                    |                |
| EPRODISATE DISODIUM       | Propoxycaine hydrochloride     |                 |              |                    |                |
| EQUILIN                   | Propylthiouracil               |                 |              |                    |                |
| ERDOSTEINE                | Proscillaridin A               |                 |              |                    |                |
| ERGOCALCIFEROL            | Prothionamide                  |                 |              |                    |                |
| ERGONOVINE MALEATE        | Protriptyline hydrochloride    |                 |              |                    |                |

| Spectrum library            | Prestwick library              | Sequoia library | ENZO library | DNA damage library | Cayman library |
|-----------------------------|--------------------------------|-----------------|--------------|--------------------|----------------|
| ERGOSTEROL                  | Pyrantel tartrate              |                 |              |                    |                |
| ERGOSTEROL ACETATE          | Pyrazinamide                   |                 |              |                    |                |
| ERGOTAMINE TARTRATE         | Pyridostigmine iodide          |                 |              |                    |                |
| ERYTHROMYCIN                | Pyridoxine hydrochloride       |                 |              |                    |                |
| ERYTHROMYCIN ESTOLATE       | Pyrilamine maleate             |                 |              |                    |                |
| ERYTHROMYCIN                |                                |                 |              |                    |                |
| ETHYLSUCCINATE              | Pyrimethamine                  |                 |              |                    |                |
| ERYTHROMYCIN STEARATE       | Pyrithidione                   |                 |              |                    |                |
| ERYTHROSE                   | Pyrvinium pamoate              |                 |              |                    |                |
| ERYTHROSINE SODIUM          | Quetiapine hemifumarate        |                 |              |                    |                |
|                             | Quinacrine dihydrochloride     |                 |              |                    |                |
| ESCITALOPRAM OXALATE        | dihydrate                      |                 |              |                    |                |
| ESCULETIN                   | Quinapril HCl                  |                 |              |                    |                |
| ESCULIN MONOHYDRATE         | Quinethazone                   |                 |              |                    |                |
|                             | Quinidine hydrochloride        |                 |              |                    |                |
| ESOMEPRAZOLE POTASSIUM      | monohydrate                    |                 |              |                    |                |
| ESTRADIOL                   | Quipazine dimaleate salt       |                 |              |                    |                |
|                             | R(-) Apomorphine hydrochloride |                 |              |                    |                |
| ESTRADIOL ACETATE           | hemihydrate                    |                 |              |                    |                |
| ESTRADIOL BENZOATE          | Rabeprazole Sodium salt        |                 |              |                    |                |
| ESTRADIOL CYPIONATE         | Racecadotril                   |                 |              |                    |                |
| ESTRADIOL DIPROPIONATE      | Racinephrine HCl               |                 |              |                    |                |
| ESTRADIOL METHYL ETHER      | Raclopride                     |                 |              |                    |                |
| ESTRADIOL VALERATE          | Raloxifene hydrochloride       |                 |              |                    |                |
| ESTRADIOL-3-SULFATE, SODIUM |                                |                 |              |                    |                |
| SALT                        | Ramipril                       |                 |              |                    |                |
| ESTRAGOLE                   | Ranitidine hydrochloride       |                 |              |                    |                |
| ESTRAMUSTINE                | Ranolazine                     |                 |              |                    |                |
| ESTRIOL                     | Rebamipide                     |                 |              |                    |                |
| ESTRONE                     | Reboxetine mesylate            |                 |              |                    |                |
| ESTRONE BENZOATE            | Remoxipride Hydrochloride      |                 |              |                    |                |
| ESTROPIPATE                 | Repaglinide                    |                 |              |                    |                |
| ESZOPICLONE                 | Reserpine                      |                 |              |                    |                |
| ETHACRIDINE LACTATE         | Retinoic acid                  |                 |              |                    |                |
| ETHACRYNIC ACID             | Ribavirin                      |                 |              |                    |                |
|                             |                                |                 |              |                    |                |
| ETHAMBUTOL HYDROCHLORIDE    | Ribostamycin sulfate salt      |                 |              |                    |                |
| ETHAMIVAN                   | Rifabutin                      |                 |              |                    |                |
| ETHANOLAMINE OLEATE         | Rifampicin                     |                 |              |                    |                |
| ETHAVERINE HYDROCHLORIDE    | Rifapentine                    |                 |              |                    |                |
| ETHENZAMIDE                 | Rifaximin                      |                 |              |                    |                |
| ETHINYL ESTRADIOL           | Riluzole hydrochloride         |                 |              |                    |                |
| ETHIONAMIDE                 | Rimantadine Hydrochloride      |                 |              |                    |                |
| ETHIONINE                   | Rimexolone                     |                 |              |                    |                |
| ETHISTERONE                 | Risperidone                    |                 |              |                    |                |
| ETHOPABATE                  | Ritodrine hydrochloride        |                 |              |                    |                |
| ETHOPROPazine               |                                |                 |              |                    |                |
| HYDROCHLORIDE               | Rivastigmine                   |                 |              |                    |                |
| ETHOSUXIMIDE                | Rofecoxib                      |                 |              |                    |                |
| ETHOTOIN                    | Rolipram                       |                 |              |                    |                |
| ETHOXZOLAMIDE               | Ronidazole                     |                 |              |                    |                |
| ETHYL PARABEN               | Ropinirole HCl                 |                 |              |                    |                |
| ETHYL VANILLIN              | Rosiglitazone Hydrochloride    |                 |              |                    |                |
| ETHYNODIOL DIACETATE        | Roxatidine Acetate HCl         |                 |              |                    |                |
| ETICLOPRIDE HYDROCHLORIDE   | Roxithromycin                  |                 |              |                    |                |
| ETIDRONATE DISODIUM         | Rufloxacin                     |                 |              |                    |                |
| ETODOLAC                    | S(-)-Eticlopride hydrochloride |                 |              |                    |                |
| ETOMIDATE                   | S-(+)-ibuprofen                |                 |              |                    |                |
| ETOPOSIDE                   | Salbutamol                     |                 |              |                    |                |
| EUCALYPTOL                  | Salmeterol                     |                 |              |                    |                |
|                             |                                |                 |              |                    |                |
| EUCATROPINE HYDROCHLORIDE   | Saquinavir mesylate            |                 |              |                    |                |
| EUGENOL                     | Sarafloxacin                   |                 |              |                    |                |
| EUPARIN                     | Scopolamine hydrochloride      |                 |              |                    |                |
|                             | Scopolamin-N-oxide             |                 |              |                    |                |
| EUPHOL                      | hydrobromide                   |                 |              |                    |                |
| EVANS BLUE                  | Secnidazole                    |                 |              |                    |                |
| EVERNINIC ACID              | Selegiline hydrochloride       |                 |              |                    |                |
| EVOXINE                     | Serotonin hydrochloride        |                 |              |                    |                |
| EXALAMIDE                   | Sertaconazole nitrate          |                 |              |                    |                |
| EXEMESTANE                  | Sertindole                     |                 |              |                    |                |
| EZETIMIBE                   | Sertraline                     |                 |              |                    |                |
| FAMCICLOVIR                 | Sibutramine HCl                |                 |              |                    |                |
| FAMOTIDINE                  | Sildenafil                     |                 |              |                    |                |
| FAMPRIDINE                  | Simvastatin                    |                 |              |                    |                |
| FAMPROFAZONE                | Sisomicin sulfate              |                 |              |                    |                |
| FARNESOL                    | Sotalol hydrochloride          |                 |              |                    |                |
| FASUDIL HYDROCHLORIDE       | Spaglumic acid                 |                 |              |                    |                |
| FEBUXOSTAT                  | Sparfloxacin                   |                 |              |                    |                |
| FELBINAC                    | Spectinomycin dihydrochloride  |                 |              |                    |                |
| FELODIPINE                  | Spiperone                      |                 |              |                    |                |
| FENACLON                    | Spiramycin                     |                 |              |                    |                |
| FENBENDAZOLE                | Spironolactone                 |                 |              |                    |                |
| FENBUFEN                    | Stanozolol                     |                 |              |                    |                |
| FENBUTYRAMIDE               | Stavudine                      |                 |              |                    |                |
| FENCLOININE                 | Streptomycin sulfate           |                 |              |                    |                |
| FENDILINE HYDROCHLORIDE     | Streptozotocin                 |                 |              |                    |                |
| FENIPENTOL                  | Succinylsulfathiazole          |                 |              |                    |                |
| FENOFIBRATE                 | Sulbactam                      |                 |              |                    |                |
| FENOFIBRIC ACID             | Sulconazole nitrate            |                 |              |                    |                |

| Spectrum library          | Prestwick library              | Sequoia library | ENZO library | DNA damage library | Cayman library |
|---------------------------|--------------------------------|-----------------|--------------|--------------------|----------------|
| FENOLDIPAM MESYLATE       | Sulfabenzamide                 |                 |              |                    |                |
| FENOPROFEN                | Sulfacetamide sodic hydrate    |                 |              |                    |                |
| FENOTEROL HYDROBROMIDE    | Sulfachloropyridazine          |                 |              |                    |                |
| FENSPIRIDE HYDROCHLORIDE  | Sulfadiazine                   |                 |              |                    |                |
| FENTHION                  | Sulfadimethoxine               |                 |              |                    |                |
| FERROUS FUMARATE          | Sulfadoxine                    |                 |              |                    |                |
| FERULIC ACID              | Sulfaguanidine                 |                 |              |                    |                |
| FEFOXENADINE              |                                |                 |              |                    |                |
| HYDROCHLORIDE             | Sulfamerazine                  |                 |              |                    |                |
| FINASTERIDE               | Sulfameter                     |                 |              |                    |                |
| FIPEXIDE HYDROCHLORIDE    | Sulfamethazine sodium salt     |                 |              |                    |                |
| FIPRONIL                  | Sulfamethizole                 |                 |              |                    |                |
| FIROCOXIB                 | Sulfamethoxazole               |                 |              |                    |                |
| FISSINOLIDE               | Sulfamethoxypyridazine         |                 |              |                    |                |
| FLAVANONE                 | Sulfamonomethoxine             |                 |              |                    |                |
| FLOPROPION                | Sulfanilamide                  |                 |              |                    |                |
| FLORFENICOL               | Sulfaphenazole                 |                 |              |                    |                |
| FLOXURIDINE               | Sulfapyridine                  |                 |              |                    |                |
| FLUCONAZOLE               | Sulfaquinoxaline sodium salt   |                 |              |                    |                |
| FLUCYTOSINE               | Sulfasalazine                  |                 |              |                    |                |
| FLUDARABINE PHOSPHATE     | Sulfathiazole                  |                 |              |                    |                |
| FLUDROCORTISONE ACETATE   | Sulfinpyrazone                 |                 |              |                    |                |
| FLUFENAMIC ACID           | Sulfisoxazole                  |                 |              |                    |                |
| FIUMAZENIL                | Sulindac                       |                 |              |                    |                |
| FLUMEQUINE                | Sulmazole                      |                 |              |                    |                |
| FLUMETHASONE              | Suloctidil                     |                 |              |                    |                |
| FLUMETHAZONE PIVALATE     | Sulpiride                      |                 |              |                    |                |
| FLUNARIZINE HYDROCHLORIDE | Sumatriptan succinate          |                 |              |                    |                |
| FLUNISOLIDE               | Suprofen                       |                 |              |                    |                |
| FLUNIXIN MEGLUMINE        | Suxibuzone                     |                 |              |                    |                |
| FLUOCINOLONE ACETONIDE    | Tacrine hydrochloride          |                 |              |                    |                |
| FLUOCINONIDE              | Talampicillin hydrochloride    |                 |              |                    |                |
| FLUORESCIN                | Tamoxifen citrate              |                 |              |                    |                |
| FLUOROMETHOLONE           | Tazobactam                     |                 |              |                    |                |
| FLUOROURACIL              | Telenzepine dihydrochloride    |                 |              |                    |                |
| FLUOXETINE                | Telmisartan                    |                 |              |                    |                |
| FLUPHENAZINE              |                                |                 |              |                    |                |
| HYDROCHLORIDE             | Temozolomide                   |                 |              |                    |                |
| FLURANDRENOLIDE           | Tenatoprazole                  |                 |              |                    |                |
| FLURBIPROFEN              | Tenoxicam                      |                 |              |                    |                |
| FLUROTHYL                 | Terazosin hydrochloride        |                 |              |                    |                |
| FLUROXENE                 | Terbutaline hemisulfate        |                 |              |                    |                |
| FLUTAMIDE                 | Terconazole                    |                 |              |                    |                |
| FLUTICASONE PROPIONATE    | Terfenadine                    |                 |              |                    |                |
| FLUVASTATIN               | Testosterone propionate        |                 |              |                    |                |
| FLUVOXAMINE MALEATE       | Tetracaine hydrochloride       |                 |              |                    |                |
| FOLIC ACID                | Tetracycline hydrochloride     |                 |              |                    |                |
|                           | Tetraethylenepentamine         |                 |              |                    |                |
| FOMEPIZOLE                | pentahydrochloride             |                 |              |                    |                |
|                           | Tetrahydroxy-1,4-quinone       |                 |              |                    |                |
| FOMEPIZOLE HYDROCHLORIDE  | monohydrate                    |                 |              |                    |                |
| FORMESTANE                | Tetrahydrozoline hydrochloride |                 |              |                    |                |
| FORMONONETIN              | Tetramisole hydrochloride      |                 |              |                    |                |
| FOSCARNET SODIUM          | Thalidomide                    |                 |              |                    |                |
| FOSFOMYCIN CALCIUM        | Theobromine                    |                 |              |                    |                |
| FOSFOSAL                  | Theophylline monohydrate       |                 |              |                    |                |
| FRAXIDIN METHYL ETHER     | Thiamine hydrochloride         |                 |              |                    |                |
| FRIEDELIN                 | Thiamphenicol                  |                 |              |                    |                |
| FTAXILIDE                 | Thiethylperazine dimalate      |                 |              |                    |                |
| FUCOSTANOL                | Thimerosal                     |                 |              |                    |                |
| FULVESTRANT               | Thiocolchicoside               |                 |              |                    |                |
| FUMARPROTOCETRARIC ACID   | Thioguanosine                  |                 |              |                    |                |
| FURALTADONE               | Thioparamide maleate           |                 |              |                    |                |
| FURAZOLIDONE              | Thiopropazine dimesylate       |                 |              |                    |                |
| FUROSEMIDE                | Thioridazine hydrochloride     |                 |              |                    |                |
| FUSIDIC ACID              | Thiorphan                      |                 |              |                    |                |
| GABAPENTIN                | Thiostrepton                   |                 |              |                    |                |
| GABOXADOL HYDROCHLORIDE   | THIP Hydrochloride             |                 |              |                    |                |
| GADOTERIDOL               | Thonzonium bromide             |                 |              |                    |                |
| GALANGIN                  | Thyroxine (L)                  |                 |              |                    |                |
| GALANGIN 3-O-METHYL ETHER | Tiabendazole                   |                 |              |                    |                |
| GALANGIN TRIMETHYL ETHER  | Tiaprude hydrochloride         |                 |              |                    |                |
| GALANTAMINE               | Tiaprofenic acid               |                 |              |                    |                |
| GALLAMINE TRIETHIODIDE    | Tibolone                       |                 |              |                    |                |
| GALLIC ACID               | Ticarcillin sodium             |                 |              |                    |                |
| GAMBOGIC ACID             | Ticlopidine hydrochloride      |                 |              |                    |                |
| gamma-AMINOBUTYRIC ACID   | Tiletamine hydrochloride       |                 |              |                    |                |
| GANCICLOVIR               | Timolol maleate salt           |                 |              |                    |                |
| GANGALEOIDIN              | Tinidazole                     |                 |              |                    |                |
| GARCINOLIC ACID           | Tioconazole                    |                 |              |                    |                |
|                           | Tiratricol, 3,3',5-            |                 |              |                    |                |
| GARDENIN B                | triiodothyroacetic acid        |                 |              |                    |                |
| GARLICIN                  | Tizanidine HCl                 |                 |              |                    |                |
| GATIFLOXACIN              | Tobramycin                     |                 |              |                    |                |
| GEDUNIN                   | Tocainide hydrochloride        |                 |              |                    |                |
| GEFITINIB                 | Todralazine hydrochloride      |                 |              |                    |                |
| GEMFIBROZIL               | Tolazamide                     |                 |              |                    |                |
| GEMIFLOXACIN MESYLATE     | Tolazoline hydrochloride       |                 |              |                    |                |
| GENETICIN                 | Tolbutamide                    |                 |              |                    |                |
| GENISTEIN                 | Tolfenamic acid                |                 |              |                    |                |

| Spectrum library                | Prestwick library               | Sequoia library | ENZO library | DNA damage library | Cayman library |
|---------------------------------|---------------------------------|-----------------|--------------|--------------------|----------------|
| GENKWANIN                       | Tolmetin sodium salt dihydrate  |                 |              |                    |                |
| GENTAMICIN SULFATE              | Tolnaftate                      |                 |              |                    |                |
| GENTIAN VIOLET                  | Toltrazuril                     |                 |              |                    |                |
| GIBBERELLIC ACID                | Tomoxetine hydrochloride        |                 |              |                    |                |
| GINKGOLIDE A                    | Topiramate                      |                 |              |                    |                |
| GITOXIGENIN DIACETATE           | Topotecan                       |                 |              |                    |                |
| GITOXIN                         | Toremifene                      |                 |              |                    |                |
| GLAFENINE                       | Torsemide                       |                 |              |                    |                |
| GLICLAZIDE                      | Tosufloxacin hydrochloride      |                 |              |                    |                |
| GLIMEPIRIDE                     | Tracazolate hydrochloride       |                 |              |                    |                |
| GLIPIZIDE                       | Tramadol hydrochloride          |                 |              |                    |                |
| GLUCITOL-4-GUCOPYANOSIDE        | Tranexamic acid                 |                 |              |                    |                |
| GLUCONOLACTONE                  | Tranilast                       |                 |              |                    |                |
| GLUCOSAMINE                     |                                 |                 |              |                    |                |
| HYDROCHLORIDE                   | Tranylcypromine hydrochloride   |                 |              |                    |                |
| GLUCOSAMINIC ACID               | Trapidil                        |                 |              |                    |                |
| GLUTAMINE (D)                   | Trazodone hydrochloride         |                 |              |                    |                |
| GLUTAMINE (L)                   | Tremorine dihydrochloride       |                 |              |                    |                |
| GLUTATHIONE                     | Triamcinolone                   |                 |              |                    |                |
| GLYBURIDE                       | Triamterene                     |                 |              |                    |                |
| GLYCOCHOLIC ACID                | Tribenoside                     |                 |              |                    |                |
| GLYCOPYRROLATE                  | Trichlorfon                     |                 |              |                    |                |
| GLICYRRHIZIC ACID,              |                                 |                 |              |                    |                |
| AMMONIUM SALT                   | Trichlormethiazide              |                 |              |                    |                |
| GOSSYPETIN                      | Triclosan                       |                 |              |                    |                |
| GOSSYPIN                        | Tridihexethyl chloride          |                 |              |                    |                |
| GOSSYPOL                        | Trifluoperazine dihydrochloride |                 |              |                    |                |
| GRAMICIDIN (gramicidin A shown) | Triflupromazine hydrochloride   |                 |              |                    |                |
| GRAMINE                         | Trifluridine                    |                 |              |                    |                |
| GRANISETRON                     |                                 |                 |              |                    |                |
| HYDROCHLORIDE                   | Triflusal                       |                 |              |                    |                |
|                                 | Trihexyphenidyl-D,L             |                 |              |                    |                |
| GRAYANOTOXIN I                  | Hydrochloride                   |                 |              |                    |                |
| GRISEOFULVIN                    | Trimeprazine tartrate           |                 |              |                    |                |
| GUAIACOL                        | Trimetazidine dihydrochloride   |                 |              |                    |                |
| GUAIAZULENE                     | Trimethadione                   |                 |              |                    |                |
|                                 | Trimethobenzamide               |                 |              |                    |                |
| GUAIFENESIN                     | hydrochloride                   |                 |              |                    |                |
| GUAIOL(-)                       | Trimethoprim                    |                 |              |                    |                |
| GUANABENZ ACETATE               | Trimipramine maleate salt       |                 |              |                    |                |
| GUANADREL SULFATE               | Trioxsalen                      |                 |              |                    |                |
| GUANETHIDINE MONOSULFATE        | Tripelennamine hydrochloride    |                 |              |                    |                |
| GUANFACINE HYDROCHLORIDE        | Tripolidine hydrochloride       |                 |              |                    |                |
| GUANIDINE HYDROCHLORIDE         | Troglitazone                    |                 |              |                    |                |
| HAEMATOMMIC ACID, ETHYL         |                                 |                 |              |                    |                |
| ESTER                           | Troleandomycin                  |                 |              |                    |                |
| HAEMATOPORPHYRIN                | Trolox                          |                 |              |                    |                |
| HAEMATOXYLIN                    | Tropicamide                     |                 |              |                    |                |
|                                 |                                 |                 |              |                    |                |
| HAEMATOXYLIN PENTAACETATE       | Tropisetron HCl                 |                 |              |                    |                |
| HALAZONE                        | Tulobuterol                     |                 |              |                    |                |
| HALOPERIDOL                     | Tylosin                         |                 |              |                    |                |
| HALOTHANE                       | Tyloxapol                       |                 |              |                    |                |
| HARMALINE                       | Urapidil hydrochloride          |                 |              |                    |                |
| HARMALOL HYDROCHLORIDE          | Urosiol                         |                 |              |                    |                |
| HARMANE                         | Valacyclovir hydrochloride      |                 |              |                    |                |
| HARMINE                         | Valproic acid                   |                 |              |                    |                |
| HARMOL HYDROCHLORIDE            | Vancomycin hydrochloride        |                 |              |                    |                |
| HARPAGOSIDE                     | Vardenafil                      |                 |              |                    |                |
| HECOGENIN                       | Vatalanib                       |                 |              |                    |                |
| HECOGENIN ACETATE               | Vecuronium bromide              |                 |              |                    |                |
| HEDERAGENIN                     | Venlafaxine                     |                 |              |                    |                |
| HELENINE                        | Verapamil hydrochloride         |                 |              |                    |                |
| HELICIN                         | Verteporfin                     |                 |              |                    |                |
| HEMATEIN                        | Vidarabine                      |                 |              |                    |                |
| HEPTAMINOL HYDROCHLORIDE        | Vigabatrin                      |                 |              |                    |                |
| HESPERETIN                      | Viloxazine hydrochloride        |                 |              |                    |                |
| HESPERIDIN                      | Vincamine                       |                 |              |                    |                |
| HETACILLIN POTASSIUM            | Vinpocetine                     |                 |              |                    |                |
| HETEROPEUCENIN, METHYL          |                                 |                 |              |                    |                |
| ETHER                           | Viomycin sulfate                |                 |              |                    |                |
| HEXACHLOROPHENE                 | Voriconazole                    |                 |              |                    |                |
| HEXAMETHONIUM BROMIDE           | Vorinostat                      |                 |              |                    |                |
| HEXAMETHYLQUERCETAGETIN         | Warfarin                        |                 |              |                    |                |
| HEXESTROL                       | Xamoterol hemifumarate          |                 |              |                    |                |
| HEXETIDINE                      | Xylazine                        |                 |              |                    |                |
| HEXYLENE GLYCOL                 | Xylometazoline hydrochloride    |                 |              |                    |                |
| HEXYLRESORCINOL                 | Yohimbine hydrochloride         |                 |              |                    |                |
| HIERACIN                        | Zafirlukast                     |                 |              |                    |                |
| HISTAMINE DIHYDROCHLORIDE       | Zalcitabine                     |                 |              |                    |                |
| HOMATROPINE                     |                                 |                 |              |                    |                |
| HYDROBROMIDE                    | Zaleplon                        |                 |              |                    |                |
| HOMATROPINE                     |                                 |                 |              |                    |                |
| METHYLBROMIDE                   | Zaprinast                       |                 |              |                    |                |
| HOMIDIUM BROMIDE                | Zardaverine                     |                 |              |                    |                |
| HOMOPTEROCARPIN                 | Zidovudine, AZT                 |                 |              |                    |                |
| HOMOSALATE                      | Zileuton                        |                 |              |                    |                |
|                                 | Zimelidine dihydrochloride      |                 |              |                    |                |
| HUMULENE (alpha)                | monohydrate                     |                 |              |                    |                |

| Spectrum library          | Prestwick library              | Sequoia library | ENZO library | DNA damage library | Cayman library |
|---------------------------|--------------------------------|-----------------|--------------|--------------------|----------------|
| HUPERZINE A               | Ziprasidone Hydrochloride      |                 |              |                    |                |
| HYCANTHONE                | Zomepirac sodium salt          |                 |              |                    |                |
| HYDRALAZINE HYDROCHLORIDE | Zonisamide                     |                 |              |                    |                |
| HYDRASTINE (1R, 9S)       | Zopiclone                      |                 |              |                    |                |
| HYDRASTININE              |                                |                 |              |                    |                |
| HYDROCHLORIDE             | Zotepine                       |                 |              |                    |                |
| HYDROCHLOROTHIAZIDE       | Zoxazolamine                   |                 |              |                    |                |
| HYDROCORTISONE            | Zuclopenthixol dihydrochloride |                 |              |                    |                |
| HYDROCORTISONE ACETATE    |                                |                 |              |                    |                |
| HYDROCORTISONE BUTYRATE   |                                |                 |              |                    |                |
| HYDROCORTISONE            |                                |                 |              |                    |                |
| HEMISUCCINATE             |                                |                 |              |                    |                |
| HYDROCORTISONE PHOSPHATE  |                                |                 |              |                    |                |
| TRIETHYLAMINE             |                                |                 |              |                    |                |
| HYDROCORTISONE VALERATE   |                                |                 |              |                    |                |
| HYDROFLUMETHIAZIDE        |                                |                 |              |                    |                |
| HYDROLYSIS PRODUCT OF     |                                |                 |              |                    |                |
| BUSSEIN                   |                                |                 |              |                    |                |
| HYDROQUINIDINE            |                                |                 |              |                    |                |
| HYDROQUINONE              |                                |                 |              |                    |                |
| HYDROXYAMPHETAMINE        |                                |                 |              |                    |                |
| HYDROBROMIDE              |                                |                 |              |                    |                |
| HYDROXYCHLOROQUINE        |                                |                 |              |                    |                |
| SULFATE                   |                                |                 |              |                    |                |
| HYDROXYPROGESTERONE       |                                |                 |              |                    |                |
| HYDROXYPROGESTERONE       |                                |                 |              |                    |                |
| CAPROATE                  |                                |                 |              |                    |                |
| HYDROXYTOLUIC ACID        |                                |                 |              |                    |                |
| HYDROXYUREA               |                                |                 |              |                    |                |
| HYDROXYZINE PAMOATE       |                                |                 |              |                    |                |
| HYMECHROME                |                                |                 |              |                    |                |
| HYMECROMONE METHYL        |                                |                 |              |                    |                |
| ETHER                     |                                |                 |              |                    |                |
| HYOSCYAMINE               |                                |                 |              |                    |                |
| HYPOXANTHINE              |                                |                 |              |                    |                |
| IBANDRONATE SODIUM        |                                |                 |              |                    |                |
| IBUPROFEN                 |                                |                 |              |                    |                |
| ICARIIN                   |                                |                 |              |                    |                |
| IDAZOXAN HYDROCHLORIDE    |                                |                 |              |                    |                |
| IDEBENONE                 |                                |                 |              |                    |                |
| IDOXURIDINE               |                                |                 |              |                    |                |
| IDRAMANTONE               |                                |                 |              |                    |                |
| IFOSFAMIDE                |                                |                 |              |                    |                |
| IMATINIB                  |                                |                 |              |                    |                |
| IMEXON                    |                                |                 |              |                    |                |
| IMIPENEM                  |                                |                 |              |                    |                |
| IMIPRAMINE HYDROCHLORIDE  |                                |                 |              |                    |                |
| IMIQUIMOD                 |                                |                 |              |                    |                |
| INAMRINONE                |                                |                 |              |                    |                |
| INDAPAMIDE                |                                |                 |              |                    |                |
| INDOLE-3-CARBINOL         |                                |                 |              |                    |                |
| INDOMETHACIN              |                                |                 |              |                    |                |
| INDOPROFEN                |                                |                 |              |                    |                |
| INOSINE                   |                                |                 |              |                    |                |
| INOSITOL                  |                                |                 |              |                    |                |
| IODIPAMIDE                |                                |                 |              |                    |                |
| IODIXANOL                 |                                |                 |              |                    |                |
| ODOQUINOL                 |                                |                 |              |                    |                |
| IOHEXOL                   |                                |                 |              |                    |                |
| IOPANIC ACID              |                                |                 |              |                    |                |
| IOTHALAMIC ACID           |                                |                 |              |                    |                |
| IOVERSOL                  |                                |                 |              |                    |                |
| IOXILAN                   |                                |                 |              |                    |                |
| IPRATROPIUM BROMIDE       |                                |                 |              |                    |                |
| IPRIFLAVONE               |                                |                 |              |                    |                |
| IPRONIAZID SULFATE        |                                |                 |              |                    |                |
| IRBESARTAN                |                                |                 |              |                    |                |
| IRETOL                    |                                |                 |              |                    |                |
| IRIDIN                    |                                |                 |              |                    |                |
| IRIGENIN                  |                                |                 |              |                    |                |
| IRIGENIN TRIMETHYL ETHER  |                                |                 |              |                    |                |
| IRIGENIN, DIBENZYL ETHER  |                                |                 |              |                    |                |
| IRIGENOL                  |                                |                 |              |                    |                |
| IRIGINOL HEXAACETATE      |                                |                 |              |                    |                |
| IRINOTECAN HYDROCHLORIDE  |                                |                 |              |                    |                |
| IRSOGLADINE MALEATE       |                                |                 |              |                    |                |
| ISAXONINE                 |                                |                 |              |                    |                |
| ISOBERGAPTENE             |                                |                 |              |                    |                |
| ISOBUTAM BEN              |                                |                 |              |                    |                |
| ISOBUTYLMETHYLXANTHINE    |                                |                 |              |                    |                |
| ISOETHARINE MESYLATE      |                                |                 |              |                    |                |
| ISOFLUPREDONE ACETATE     |                                |                 |              |                    |                |
| ISOFORMONONETIN           |                                |                 |              |                    |                |
| ISOKOBUSONE               |                                |                 |              |                    |                |
| ISOLIQURITIGENIN          |                                |                 |              |                    |                |
| ISONIAZID                 |                                |                 |              |                    |                |
| ISOOSAJIN                 |                                |                 |              |                    |                |
| ISOPEONOL                 |                                |                 |              |                    |                |
| ISOPIMPINELLIN            |                                |                 |              |                    |                |

| Spectrum library          | Prestwick library | Sequoia library | ENZO library | DNA damage library | Cayman library |
|---------------------------|-------------------|-----------------|--------------|--------------------|----------------|
| ISOPOMIFERIN              |                   |                 |              |                    |                |
| ISOPROPAMIDE IODIDE       |                   |                 |              |                    |                |
| ISOPROTERENOL             |                   |                 |              |                    |                |
| HYDROCHLORIDE             |                   |                 |              |                    |                |
| ISOROTENONE               |                   |                 |              |                    |                |
| ISOSORBIDE DINITRATE      |                   |                 |              |                    |                |
| ISOSORBIDE MONONITRATE    |                   |                 |              |                    |                |
| ISOTECTORIGENIN, 7-METHYL |                   |                 |              |                    |                |
| ETHER                     |                   |                 |              |                    |                |
| ISOTRETINON               |                   |                 |              |                    |                |
| ISOVALERAMIDE             |                   |                 |              |                    |                |
| ISOXICAM                  |                   |                 |              |                    |                |
| ISOXSUPRINE HYDROCHLORIDE |                   |                 |              |                    |                |
| ISRADIPINE                |                   |                 |              |                    |                |
| ITOPRIDE HYDROCHLORIDE    |                   |                 |              |                    |                |
| ITRACONAZOLE              |                   |                 |              |                    |                |
| IVERMECTIN                |                   |                 |              |                    |                |
| IZALPININ                 |                   |                 |              |                    |                |
| JUAREZIC ACID             |                   |                 |              |                    |                |
| JUGLONE                   |                   |                 |              |                    |                |
| KAEMPFEROL                |                   |                 |              |                    |                |
| KANAMYCIN A SULFATE       |                   |                 |              |                    |                |
| KASUGAMYCIN               |                   |                 |              |                    |                |
| HYDROCHLORIDE             |                   |                 |              |                    |                |
| KAWAIN                    |                   |                 |              |                    |                |
| KETANSERIN TARTRATE       |                   |                 |              |                    |                |
| KETCONAZOLE               |                   |                 |              |                    |                |
| KETOPROFEN                |                   |                 |              |                    |                |
| KETOROLAC TROMETHAMINE    |                   |                 |              |                    |                |
| KETOTIFEN FUMARATE        |                   |                 |              |                    |                |
| KHAYANTHONE               |                   |                 |              |                    |                |
| KHELLIN                   |                   |                 |              |                    |                |
| KHIVORIN                  |                   |                 |              |                    |                |
| KINETIN                   |                   |                 |              |                    |                |
| KOBUSONE                  |                   |                 |              |                    |                |
| KOPARIN                   |                   |                 |              |                    |                |
| KYNURENINE                |                   |                 |              |                    |                |
| L(+/-)-ALLIIN             |                   |                 |              |                    |                |
| LABETALOL HYDROCHLORIDE   |                   |                 |              |                    |                |
| LACCAIC ACID A            |                   |                 |              |                    |                |
| LACITOL                   |                   |                 |              |                    |                |
| LACTOBIONIC ACID          |                   |                 |              |                    |                |
| LACTULOSE                 |                   |                 |              |                    |                |
| LAGOCHILIN                |                   |                 |              |                    |                |
| LAMIVUDINE                |                   |                 |              |                    |                |
| LAMOTRIGINE               |                   |                 |              |                    |                |
| LANATOSIDE C              |                   |                 |              |                    |                |
| LANOSTEROL                |                   |                 |              |                    |                |
| LANOSTEROL ACETATE        |                   |                 |              |                    |                |
| LANSOPRAZOLE              |                   |                 |              |                    |                |
| LARIXINIC ACID            |                   |                 |              |                    |                |
| LARIXOL                   |                   |                 |              |                    |                |
| LATHOSTEROL               |                   |                 |              |                    |                |
| LAWSONE                   |                   |                 |              |                    |                |
| L-BUTHIONINE SULFOXIMINE  |                   |                 |              |                    |                |
| L-DEOXYALLIIN             |                   |                 |              |                    |                |
| LECANORIC ACID            |                   |                 |              |                    |                |
| LEFLUNOMIDE               |                   |                 |              |                    |                |
| LEOIDIN                   |                   |                 |              |                    |                |
| LETROZOLE                 |                   |                 |              |                    |                |
| LEUCOVORIN CALCIUM        |                   |                 |              |                    |                |
| LEVALBUTEROL              |                   |                 |              |                    |                |
| HYDROCHLORIDE             |                   |                 |              |                    |                |
| LEVAMISOLE HYDROCHLORIDE  |                   |                 |              |                    |                |
| LEVCYCLOSERINE            |                   |                 |              |                    |                |
| LEVOBUNOLOL               |                   |                 |              |                    |                |
| HYDROCHLORIDE             |                   |                 |              |                    |                |
| LEVOCARNITINE             |                   |                 |              |                    |                |
| LEVOCARNITINE PROPIONATE  |                   |                 |              |                    |                |
| HYDROCHLORIDE             |                   |                 |              |                    |                |
| LEVOCETIRIZINE            |                   |                 |              |                    |                |
| DIHYDROCHLORIDE           |                   |                 |              |                    |                |
| LEVODOPA                  |                   |                 |              |                    |                |
| LEVOFLOXACIN              |                   |                 |              |                    |                |
| LEVOMENTHOL               |                   |                 |              |                    |                |
| LEVONORGESTREL            |                   |                 |              |                    |                |
| LEVOSIMENDAN              |                   |                 |              |                    |                |
| LEVOTHYROXINE             |                   |                 |              |                    |                |
| LEVULINIC ACID, 3-        |                   |                 |              |                    |                |
| BENZYLIDENYL-             |                   |                 |              |                    |                |
| LIDOCAINE HYDROCHLORIDE   |                   |                 |              |                    |                |
| LIMONIN                   |                   |                 |              |                    |                |
| LINAGLIPTIN               |                   |                 |              |                    |                |
| LINALOOL (+)              |                   |                 |              |                    |                |
| LINAMARIN                 |                   |                 |              |                    |                |
| LINCOMYCIN HYDROCHLORIDE  |                   |                 |              |                    |                |
| LINDANE                   |                   |                 |              |                    |                |
| LINEZOLID                 |                   |                 |              |                    |                |
| LIOTHYRONINE              |                   |                 |              |                    |                |

| Spectrum library            | Prestwick library | Sequoia library | ENZO library | DNA damage library | Cayman library |
|-----------------------------|-------------------|-----------------|--------------|--------------------|----------------|
| LIOTHYRONINE (L- isomer)    |                   |                 |              |                    |                |
| SODIUM                      |                   |                 |              |                    |                |
| LIPOAMIDE                   |                   |                 |              |                    |                |
| LISINOPRIL                  |                   |                 |              |                    |                |
| LITHIUM CITRATE             |                   |                 |              |                    |                |
| LITHOCHOLIC ACID            |                   |                 |              |                    |                |
| L-LEUCYL-L-ALANINE          |                   |                 |              |                    |                |
| LOBARIC ACID                |                   |                 |              |                    |                |
| LOBELINE HYDROCHLORIDE      |                   |                 |              |                    |                |
| LOBENDAZOLE                 |                   |                 |              |                    |                |
| LOFEXIDINE HYDROCHLORIDE    |                   |                 |              |                    |                |
| LOMEFLOXACIN                |                   |                 |              |                    |                |
| HYDROCHLORIDE               |                   |                 |              |                    |                |
| LOMERIZINE HYDROCHLORIDE    |                   |                 |              |                    |                |
| LOMUSTINE                   |                   |                 |              |                    |                |
| LOPERAMIDE HYDROCHLORIDE    |                   |                 |              |                    |                |
| LORATADINE                  |                   |                 |              |                    |                |
| LORGLUMIDE SODIUM           |                   |                 |              |                    |                |
| LORNOXICAM                  |                   |                 |              |                    |                |
| LOSARTAN                    |                   |                 |              |                    |                |
| LOVASTATIN                  |                   |                 |              |                    |                |
| LOXAPINE SUCCINATE          |                   |                 |              |                    |                |
| LOXOPROFEN                  |                   |                 |              |                    |                |
| L-PHENYLALANINOL            |                   |                 |              |                    |                |
| L-SERYL-L-GLUTAMINE         |                   |                 |              |                    |                |
| LUFENURON                   |                   |                 |              |                    |                |
| LUMIRACOXIB                 |                   |                 |              |                    |                |
| LUPANINE PERCHLORATE        |                   |                 |              |                    |                |
| LUPANYL ACID                |                   |                 |              |                    |                |
| HYDROCHLORIDE               |                   |                 |              |                    |                |
| LUPEOL                      |                   |                 |              |                    |                |
| LUPEOL ACETATE              |                   |                 |              |                    |                |
| LUPININE                    |                   |                 |              |                    |                |
| MADECASSIC ACID             |                   |                 |              |                    |                |
| MAFENIDE HYDROCHLORIDE      |                   |                 |              |                    |                |
| MALATHION                   |                   |                 |              |                    |                |
|                             |                   |                 |              |                    |                |
| MANDELIC ACID, METHYL ESTER |                   |                 |              |                    |                |
| MANGAFODIPIR TRISODIUM      |                   |                 |              |                    |                |
| MANGIFERIN                  |                   |                 |              |                    |                |
| MANGOSTIN TRIMETHYL ETHER   |                   |                 |              |                    |                |
| MANIDIPINE HYDROCHLORIDE    |                   |                 |              |                    |                |
| MANNITOL                    |                   |                 |              |                    |                |
|                             |                   |                 |              |                    |                |
| MAPROTILINE HYDROCHLORIDE   |                   |                 |              |                    |                |
| MEBENDAZOLE                 |                   |                 |              |                    |                |
| MEBEVERINE HYDROCHLORIDE    |                   |                 |              |                    |                |
| MEBHYDROLIN                 |                   |                 |              |                    |                |
| NAPHTHALENESULFONATE        |                   |                 |              |                    |                |
| MECAMYLAMINE                |                   |                 |              |                    |                |
| HYDROCHLORIDE               |                   |                 |              |                    |                |
| MECHLORETHAMINE             |                   |                 |              |                    |                |
| MECLIZINE HYDROCHLORIDE     |                   |                 |              |                    |                |
| MECLOCYCLINE                |                   |                 |              |                    |                |
| SULFOSALICYLATE             |                   |                 |              |                    |                |
| MECLOFENAMATE SODIUM        |                   |                 |              |                    |                |
| MECLOFENOXATE               |                   |                 |              |                    |                |
| HYDROCHLORIDE               |                   |                 |              |                    |                |
| MECYSTEINE HYDROCHLORIDE    |                   |                 |              |                    |                |
| MEDROXYPROGESTERONE         |                   |                 |              |                    |                |
| ACETATE                     |                   |                 |              |                    |                |
| MEDRYSONE                   |                   |                 |              |                    |                |
| MEFENAMIC ACID              |                   |                 |              |                    |                |
| MEFEXAMIDE HYDROCHLORIDE    |                   |                 |              |                    |                |
| MEFLOQUINE                  |                   |                 |              |                    |                |
| MEGESTROL ACETATE           |                   |                 |              |                    |                |
| MEGLUMINE                   |                   |                 |              |                    |                |
| MEGLUTOL                    |                   |                 |              |                    |                |
| MELATONIN                   |                   |                 |              |                    |                |
| MELENGESTROL ACETATE        |                   |                 |              |                    |                |
| MELEZITOSE                  |                   |                 |              |                    |                |
| MELIBIOSE                   |                   |                 |              |                    |                |
| MELOXICAM SODIUM            |                   |                 |              |                    |                |
| MELPHALAN                   |                   |                 |              |                    |                |
| MEMANTINE HYDROCHLORIDE     |                   |                 |              |                    |                |
| MENADIONE                   |                   |                 |              |                    |                |
| MENAUQUINONE-4              |                   |                 |              |                    |                |
| MENBUTONE                   |                   |                 |              |                    |                |
| MENTHONE                    |                   |                 |              |                    |                |
| MENTHYL BENZOATE            |                   |                 |              |                    |                |
| MEPARFYLON                  |                   |                 |              |                    |                |
| MEPARTRICIN                 |                   |                 |              |                    |                |
| MEPENZOLATE BROMIDE         |                   |                 |              |                    |                |
| MEPHENESIN                  |                   |                 |              |                    |                |
| MEPHENTERMINE SULFATE       |                   |                 |              |                    |                |
| MEPHENYTOIN                 |                   |                 |              |                    |                |
| MEPIROXOL                   |                   |                 |              |                    |                |
|                             |                   |                 |              |                    |                |
| MEPIVACAINE HYDROCHLORIDE   |                   |                 |              |                    |                |

| Spectrum library           | Prestwick library | Sequoia library | ENZO library | DNA damage library | Cayman library |
|----------------------------|-------------------|-----------------|--------------|--------------------|----------------|
| MEPRYLCAINE HYDROCHLORIDE  |                   |                 |              |                    |                |
| MEQUINOL                   |                   |                 |              |                    |                |
| MERBROMIN                  |                   |                 |              |                    |                |
| MERCAPTOPURINE             |                   |                 |              |                    |                |
| MEROGEDUNIN                |                   |                 |              |                    |                |
| MEROPENEM                  |                   |                 |              |                    |                |
| MESALAMINE                 |                   |                 |              |                    |                |
| MESNA                      |                   |                 |              |                    |                |
| MESORIDAZINE BESYLATE      |                   |                 |              |                    |                |
| MESTRANOL                  |                   |                 |              |                    |                |
| METACETAMOL                |                   |                 |              |                    |                |
| meta-CRESYL ACETATE        |                   |                 |              |                    |                |
| METAMECONINE               |                   |                 |              |                    |                |
| METAPROTERENOL             |                   |                 |              |                    |                |
| METARAMINOL BITARTRATE     |                   |                 |              |                    |                |
| METAXALONE                 |                   |                 |              |                    |                |
| METERGOLINE                |                   |                 |              |                    |                |
| METFORMIN HYDROCHLORIDE    |                   |                 |              |                    |                |
| METHACHOLINE CHLORIDE      |                   |                 |              |                    |                |
| METHACYCLINE               |                   |                 |              |                    |                |
| HYDROCHLORIDE              |                   |                 |              |                    |                |
| METHAPYRILENE              |                   |                 |              |                    |                |
| HYDROCHLORIDE              |                   |                 |              |                    |                |
| METHAZOLAMIDE              |                   |                 |              |                    |                |
| METHENAMINE                |                   |                 |              |                    |                |
| METHICILLIN SODIUM         |                   |                 |              |                    |                |
| METHIMAZOLE                |                   |                 |              |                    |                |
| METHIONINE SULFOXIMINE (L) |                   |                 |              |                    |                |
| METHOCARBAMOL              |                   |                 |              |                    |                |
| METHOPRENE (S)             |                   |                 |              |                    |                |
| METHOTREXATE(+/-)          |                   |                 |              |                    |                |
| METHOXAMINE                |                   |                 |              |                    |                |
| HYDROCHLORIDE              |                   |                 |              |                    |                |
| METHOXSALEN                |                   |                 |              |                    |                |
| METHOXYAMINE               |                   |                 |              |                    |                |
| HYDROCHLORIDE              |                   |                 |              |                    |                |
| METHOXYVONE                |                   |                 |              |                    |                |
| METHSCOPOLAMINE BROMIDE    |                   |                 |              |                    |                |
| METHSUXIMIDE               |                   |                 |              |                    |                |
| METHYLCLOTHIAZIDE          |                   |                 |              |                    |                |
| METHYL 7-                  |                   |                 |              |                    |                |
| DESHYDROXYPYROGALLIN-4-    |                   |                 |              |                    |                |
| CARBOXYLATE                |                   |                 |              |                    |                |
| METHYL DEOXYCHOLATE        |                   |                 |              |                    |                |
| METHYL GAMBOGATE METHYL    |                   |                 |              |                    |                |
| ETHER                      |                   |                 |              |                    |                |
| METHYL ORSELLINATE         |                   |                 |              |                    |                |
| METHYL ROBUSTONE           |                   |                 |              |                    |                |
| METHYL                     |                   |                 |              |                    |                |
| TRIMETHOXYCINNAMATE        |                   |                 |              |                    |                |
| METHYLATROPINE NITRATE     |                   |                 |              |                    |                |
| METHYLBENZETHONIUM         |                   |                 |              |                    |                |
| CHLORIDE                   |                   |                 |              |                    |                |
| METHYLDOPA                 |                   |                 |              |                    |                |
| METHYLENE BLUE             |                   |                 |              |                    |                |
| METHYLERGONOVINE MALEATE   |                   |                 |              |                    |                |
| METHYLPHENIDATE            |                   |                 |              |                    |                |
| HYDROCHLORIDE              |                   |                 |              |                    |                |
| METHYLPREDNISOLONE         |                   |                 |              |                    |                |
| METHYLPREDNISOLONE         |                   |                 |              |                    |                |
| SODIUM SUCCINATE           |                   |                 |              |                    |                |
| METHYLTHIOURACIL           |                   |                 |              |                    |                |
| METHYSERGIDE MALEATE       |                   |                 |              |                    |                |
| METICRANE                  |                   |                 |              |                    |                |
| METITEPINE MALEATE         |                   |                 |              |                    |                |
| METOCLOPRAMIDE             |                   |                 |              |                    |                |
| HYDROCHLORIDE              |                   |                 |              |                    |                |
| METOLAZONE                 |                   |                 |              |                    |                |
| METOPROLOL TARTRATE        |                   |                 |              |                    |                |
| METRONIDAZOLE              |                   |                 |              |                    |                |
| METYRAPONE                 |                   |                 |              |                    |                |
| MEVALONIC ACID LACTONE     |                   |                 |              |                    |                |
| MEXAMINE                   |                   |                 |              |                    |                |
| MEXENEONE                  |                   |                 |              |                    |                |
| MEXICANOLIDE               |                   |                 |              |                    |                |
| MEXILETINE HYDROCHLORIDE   |                   |                 |              |                    |                |
| MIANSERIN HYDROCHLORIDE    |                   |                 |              |                    |                |
| MICONAZOLE NITRATE         |                   |                 |              |                    |                |
| MIDODRINE HYDROCHLORIDE    |                   |                 |              |                    |                |
| MIFEPRISTONE               |                   |                 |              |                    |                |
| MIGLITOL                   |                   |                 |              |                    |                |
| MILNACIPRAN HYDROCHLORIDE  |                   |                 |              |                    |                |
| MILRINONE                  |                   |                 |              |                    |                |
| MILTEFOSINE                |                   |                 |              |                    |                |
| MIMOSINE                   |                   |                 |              |                    |                |
| MINAPRINE HYDROCHLORIDE    |                   |                 |              |                    |                |

| Spectrum library           | Prestwick library | Sequoia library | ENZO library | DNA damage library | Cayman library |
|----------------------------|-------------------|-----------------|--------------|--------------------|----------------|
| MINOCYCLINE HYDROCHLORIDE  |                   |                 |              |                    |                |
| MINOXIDIL                  |                   |                 |              |                    |                |
| MITOMYCIN                  |                   |                 |              |                    |                |
| MITOTANE                   |                   |                 |              |                    |                |
| MITOXANTRONE               |                   |                 |              |                    |                |
| HYDROCHLORIDE              |                   |                 |              |                    |                |
| MITRAPHYLLINE              |                   |                 |              |                    |                |
| MODAFINIL                  |                   |                 |              |                    |                |
| MODALINE SULFATE           |                   |                 |              |                    |                |
| MOGUISTEINE                |                   |                 |              |                    |                |
| MOLSIDOMINE                |                   |                 |              |                    |                |
| MOMETASONE FUROATE         |                   |                 |              |                    |                |
| MONENSIN SODIUM (monensin  |                   |                 |              |                    |                |
| A is shown)                |                   |                 |              |                    |                |
| MONOBENZONE                |                   |                 |              |                    |                |
| MONOCROTALINE              |                   |                 |              |                    |                |
| MONTELUKAST SODIUM         |                   |                 |              |                    |                |
| MORANTEL CITRATE           |                   |                 |              |                    |                |
| MORIN                      |                   |                 |              |                    |                |
| MOROXYDINE HYDROCHLORIDE   |                   |                 |              |                    |                |
| MOXALACTAM DISODIUM        |                   |                 |              |                    |                |
| MOXIDECTIN                 |                   |                 |              |                    |                |
| MOXIFLOXACIN               |                   |                 |              |                    |                |
| HYDROCHLORIDE              |                   |                 |              |                    |                |
| MOXISLYTE HYDROCHORIDE     |                   |                 |              |                    |                |
| MUCIC ACID                 |                   |                 |              |                    |                |
| MUNDOSERONE                |                   |                 |              |                    |                |
| MUNDULONE                  |                   |                 |              |                    |                |
| MUNDULONE ACETATE          |                   |                 |              |                    |                |
| MUPIROCIN                  |                   |                 |              |                    |                |
| MUROLLADIE-3-ONE           |                   |                 |              |                    |                |
| MYCOPHENOLATE MOFETIL      |                   |                 |              |                    |                |
| MYCOPHENOLIC ACID          |                   |                 |              |                    |                |
| MYOSMINE                   |                   |                 |              |                    |                |
| N,N-                       |                   |                 |              |                    |                |
| HEXAMETHYLENEAMILORIDE     |                   |                 |              |                    |                |
| NABUMETONE                 |                   |                 |              |                    |                |
| N-ACETYLMURAMIC ACID       |                   |                 |              |                    |                |
| N-ACETYLPROLINE            |                   |                 |              |                    |                |
| NADIDE                     |                   |                 |              |                    |                |
| NADIFLOXACIN               |                   |                 |              |                    |                |
| NADOLOL                    |                   |                 |              |                    |                |
| NAFCILLIN SODIUM           |                   |                 |              |                    |                |
| NAFRONYL OXALATE           |                   |                 |              |                    |                |
| NAFTIFINE HYDROCHLORIDE    |                   |                 |              |                    |                |
| NAFTOPIDIL                 |                   |                 |              |                    |                |
| NALBUPHINE HYDROCHLORIDE   |                   |                 |              |                    |                |
| NALIDIXIC ACID             |                   |                 |              |                    |                |
| NALOXONE HYDROCHLORIDE     |                   |                 |              |                    |                |
| NALTREXONE HYDROCHLORIDE   |                   |                 |              |                    |                |
| NANOFIN                    |                   |                 |              |                    |                |
| NAPHAZOLINE HYDROCHLORIDE  |                   |                 |              |                    |                |
| NAPROXEN(+)                |                   |                 |              |                    |                |
| NARINGENIN                 |                   |                 |              |                    |                |
| NARINGIN                   |                   |                 |              |                    |                |
| NATAMYCIN                  |                   |                 |              |                    |                |
| NATEGLINIDE                |                   |                 |              |                    |                |
| NEFAZODONE HYDROCHLORIDE   |                   |                 |              |                    |                |
| NEFIRACETAM                |                   |                 |              |                    |                |
| NEFOPAM                    |                   |                 |              |                    |                |
| NELARABIN                  |                   |                 |              |                    |                |
| NEOMYCIN SULFATE           |                   |                 |              |                    |                |
| NEOSTIGMINE BROMIDE        |                   |                 |              |                    |                |
| NEROL                      |                   |                 |              |                    |                |
| NEROLIDOL                  |                   |                 |              |                    |                |
| NETILMICIN SULFATE         |                   |                 |              |                    |                |
| NEVIRAPINE                 |                   |                 |              |                    |                |
| NIACIN                     |                   |                 |              |                    |                |
| NIACINAMIDE                |                   |                 |              |                    |                |
| NIALAMIDE                  |                   |                 |              |                    |                |
| NICARDIPINE HYDROCHLORIDE  |                   |                 |              |                    |                |
| NICERGOLINE                |                   |                 |              |                    |                |
| NICLOSAMIDE                |                   |                 |              |                    |                |
| NICOPHOLINE                |                   |                 |              |                    |                |
| NICOTINE BITARTRATE        |                   |                 |              |                    |                |
| NICOTINYL ALCOHOL TARTRATE |                   |                 |              |                    |                |
| NIFEDIPINE                 |                   |                 |              |                    |                |
| NIFENAZONE                 |                   |                 |              |                    |                |
| NIFLUMIC ACID              |                   |                 |              |                    |                |
| NIFUROXAZIDE               |                   |                 |              |                    |                |
| NIFURSOL                   |                   |                 |              |                    |                |
| NIKETHAMIDE                |                   |                 |              |                    |                |
| NILUTAMIDE                 |                   |                 |              |                    |                |
| NIMESULIDE                 |                   |                 |              |                    |                |
| NIMODIPINE                 |                   |                 |              |                    |                |
| NIMUSTINE                  |                   |                 |              |                    |                |

| Spectrum library                | Prestwick library | Sequoia library | ENZO library | DNA damage library | Cayman library |
|---------------------------------|-------------------|-----------------|--------------|--------------------|----------------|
| NIPECOTIC ACID                  |                   |                 |              |                    |                |
| NISOLDIPINE                     |                   |                 |              |                    |                |
| NITARSONE                       |                   |                 |              |                    |                |
| NITAZOXANIDE                    |                   |                 |              |                    |                |
| NITHIAMIDE                      |                   |                 |              |                    |                |
| NITRENDIPINE                    |                   |                 |              |                    |                |
| NITROFURANTOIN                  |                   |                 |              |                    |                |
| NITROFURAZONE                   |                   |                 |              |                    |                |
| NITROGLYCERIN                   |                   |                 |              |                    |                |
| NITROMIDE                       |                   |                 |              |                    |                |
| NITROXOLINE                     |                   |                 |              |                    |                |
| NIZATIDINE                      |                   |                 |              |                    |                |
|                                 |                   |                 |              |                    |                |
| N-METHYL (-)-EPHEDRINE [1R,2S]  |                   |                 |              |                    |                |
| N-METHYLANTHRANILIC ACID        |                   |                 |              |                    |                |
| N-METHYLBENZYLAMINE             |                   |                 |              |                    |                |
| HYDROCHLORIDE                   |                   |                 |              |                    |                |
| N-METHYL-D-ASPARTIC ACID (NMDA) |                   |                 |              |                    |                |
| N-METHYLSOLEUCINE               |                   |                 |              |                    |                |
| NOBILETIN                       |                   |                 |              |                    |                |
| NOMIFENSINE MALEATE             |                   |                 |              |                    |                |
| NONIC ACID                      |                   |                 |              |                    |                |
| NONIVAMIDE                      |                   |                 |              |                    |                |
| NONOXYNOL-9                     |                   |                 |              |                    |                |
| NORCANTHARIDIN                  |                   |                 |              |                    |                |
| NOREPINEPHRINE                  |                   |                 |              |                    |                |
| NORETHINDRONE                   |                   |                 |              |                    |                |
| NORETHINDRONE ACETATE           |                   |                 |              |                    |                |
| NORETHYNODREL                   |                   |                 |              |                    |                |
| NORFLOXACIN                     |                   |                 |              |                    |                |
| NORGESTIMATE                    |                   |                 |              |                    |                |
| NORGESTREL                      |                   |                 |              |                    |                |
| NORSTICTIC ACID                 |                   |                 |              |                    |                |
| NORSTICTIC ACID                 |                   |                 |              |                    |                |
| PENTAACETATE                    |                   |                 |              |                    |                |
| NORTRIPTYLINE                   |                   |                 |              |                    |                |
| HYDROCHLORIDE                   |                   |                 |              |                    |                |
| NOSCAPINE HYDROCHLORIDE         |                   |                 |              |                    |                |
| NOVOBIOCIN SODIUM               |                   |                 |              |                    |                |
| N-PHENYLANTHRANILIC ACID        |                   |                 |              |                    |                |
| NYLIDRIN HYDROCHLORIDE          |                   |                 |              |                    |                |
| NYSTATIN                        |                   |                 |              |                    |                |
| O-BENZYL-L-SERINE               |                   |                 |              |                    |                |
| OBLIQUIN                        |                   |                 |              |                    |                |
| OBTUSAQUINONE                   |                   |                 |              |                    |                |
| OCTINOXATE                      |                   |                 |              |                    |                |
| OCTISALATE                      |                   |                 |              |                    |                |
| OCTOCRYLENE                     |                   |                 |              |                    |                |
|                                 |                   |                 |              |                    |                |
| OCTOPAMINE HYDROCHLORIDE        |                   |                 |              |                    |                |
| OFLOXACIN                       |                   |                 |              |                    |                |
| OLANZAPINE                      |                   |                 |              |                    |                |
| OLEANDOMYCIN PHOSPHATE          |                   |                 |              |                    |                |
| OLEANOIC ACID                   |                   |                 |              |                    |                |
| OLMESARTAN                      |                   |                 |              |                    |                |
| OLMESARTAN MEDOXOMIL            |                   |                 |              |                    |                |
| OLSALAZINE SODIUM               |                   |                 |              |                    |                |
| OLTIPRAZ                        |                   |                 |              |                    |                |
| OMEGA-3-ACID ESTERS (EPA shown) |                   |                 |              |                    |                |
| OMEPRAZOLE                      |                   |                 |              |                    |                |
| ONDANSETRON                     |                   |                 |              |                    |                |
| ONONETIN                        |                   |                 |              |                    |                |
| ORBIFLOXACIN                    |                   |                 |              |                    |                |
| ORLISTAT                        |                   |                 |              |                    |                |
| ORNIDAZOLE                      |                   |                 |              |                    |                |
| ORNITHINE HYDROCHLORIDE         |                   |                 |              |                    |                |
| OTOTIC ACID                     |                   |                 |              |                    |                |
| ORPHENADRINE CITRATE            |                   |                 |              |                    |                |
| ORSELLINIC ACID                 |                   |                 |              |                    |                |
| ORSELLINIC ACID, ETHYL ESTER    |                   |                 |              |                    |                |
| OSAJIN                          |                   |                 |              |                    |                |
| OSAJIN 4'-METHYL ETHER          |                   |                 |              |                    |                |
| OSELTAMIVIR PHOSPHATE           |                   |                 |              |                    |                |
| OUABAIN                         |                   |                 |              |                    |                |
| OXACILLIN SODIUM                |                   |                 |              |                    |                |
| OXALIPLATIN                     |                   |                 |              |                    |                |
| OXANTEL PAMOATE                 |                   |                 |              |                    |                |
| OXAPROZIN                       |                   |                 |              |                    |                |
| OXCARBAZEPINE                   |                   |                 |              |                    |                |
| OXEDRINE                        |                   |                 |              |                    |                |
| OXELADIN CITRATE                |                   |                 |              |                    |                |
| OXETHAZINE                      |                   |                 |              |                    |                |
| OXFENDAZOLE                     |                   |                 |              |                    |                |
| OXIBENDAZOLE                    |                   |                 |              |                    |                |
| OXICONAZOLE NITRATE             |                   |                 |              |                    |                |
| OXIDOPAMINE                     |                   |                 |              |                    |                |
| HYDROCHLORIDE                   |                   |                 |              |                    |                |
| OXINIACIC ACID                  |                   |                 |              |                    |                |

| Spectrum library            | Prestwick library | Sequoia library | ENZO library | DNA damage library | Cayman library |
|-----------------------------|-------------------|-----------------|--------------|--------------------|----------------|
| OXOLAMINE CITRATE           |                   |                 |              |                    |                |
| OXOLINIC ACID               |                   |                 |              |                    |                |
| OXONITINE                   |                   |                 |              |                    |                |
| OXTRIPHYLLINE               |                   |                 |              |                    |                |
| OXYBENZONE                  |                   |                 |              |                    |                |
| OXYBUTYNIN CHLORIDE         |                   |                 |              |                    |                |
| OXYCLOZANIDE                |                   |                 |              |                    |                |
| OXYMETAZOLINE               |                   |                 |              |                    |                |
| HYDROCHLORIDE               |                   |                 |              |                    |                |
| OXYPHENBUTAZONE             |                   |                 |              |                    |                |
| OXYPHENCYCLIMINE            |                   |                 |              |                    |                |
| HYDROCHLORIDE               |                   |                 |              |                    |                |
| OXYPHENONIUM BROMIDE        |                   |                 |              |                    |                |
| OXYQUINOLINE SULFATE        |                   |                 |              |                    |                |
| OXYTETRACYCLINE             |                   |                 |              |                    |                |
| OXYTHIAMINE CHLORIDE        |                   |                 |              |                    |                |
| HYDROCHLORIDE               |                   |                 |              |                    |                |
| PACHYRRHIZIN                |                   |                 |              |                    |                |
| PACLITAXEL                  |                   |                 |              |                    |                |
| PAEONOL                     |                   |                 |              |                    |                |
| PALIPERIDONE                |                   |                 |              |                    |                |
| PALMATINE CHLORIDE          |                   |                 |              |                    |                |
| PALMIDROL                   |                   |                 |              |                    |                |
| PAMABROM                    |                   |                 |              |                    |                |
| PANCURONIUM BROMIDE         |                   |                 |              |                    |                |
| PANGAMIC ACID SODIUM        |                   |                 |              |                    |                |
| PANTETHINE                  |                   |                 |              |                    |                |
| PANTOPRAZOLE                |                   |                 |              |                    |                |
| PANTOTHENIC ACID(d) Na salt |                   |                 |              |                    |                |
| PAPAVERINE HYDROCHLORIDE    |                   |                 |              |                    |                |
| PARACHLOROPHENOL            |                   |                 |              |                    |                |
| PARAMETHADIONE              |                   |                 |              |                    |                |
| PARAXANTHINE                |                   |                 |              |                    |                |
| PARGYLINE HYDROCHLORIDE     |                   |                 |              |                    |                |
| PAROMOMYCIN SULFATE         |                   |                 |              |                    |                |
| PAROXETINE HYDROCHLORIDE    |                   |                 |              |                    |                |
| PAROXYPROPIONE              |                   |                 |              |                    |                |
| PASINIAZID                  |                   |                 |              |                    |                |
| PATULIN                     |                   |                 |              |                    |                |
| PAZUFLOXACIN MESYLATE       |                   |                 |              |                    |                |
| PECTOLINARIN                |                   |                 |              |                    |                |
| PEFLOXACINE MESYLATE        |                   |                 |              |                    |                |
| PEMETREXED                  |                   |                 |              |                    |                |
| PEMPIDINE TARTRATE          |                   |                 |              |                    |                |
| PENBUTOLOL SULFATE          |                   |                 |              |                    |                |
| PENCICLOVIR                 |                   |                 |              |                    |                |
| PENFLURIDOL                 |                   |                 |              |                    |                |
| PENICILLAMINE               |                   |                 |              |                    |                |
| PENICILLIN G POTASSIUM      |                   |                 |              |                    |                |
| PENICILLIN V POTASSIUM      |                   |                 |              |                    |                |
| PENTAGASTRIN                |                   |                 |              |                    |                |
| PENTAMIDINE ISETHIONATE     |                   |                 |              |                    |                |
| PENTETIC ACID               |                   |                 |              |                    |                |
| PENTOXIFYLLINE              |                   |                 |              |                    |                |
| PENTYLENETETRAZOL           |                   |                 |              |                    |                |
| PEONIFLORIN                 |                   |                 |              |                    |                |
| PEONOL METHYL ETHER         |                   |                 |              |                    |                |
| PERGOLIDE MESYLATE          |                   |                 |              |                    |                |
| PERHEXILINE MALEATE         |                   |                 |              |                    |                |
| PERILLIC ACID (-)           |                   |                 |              |                    |                |
| PERILLYL ALCOHOL            |                   |                 |              |                    |                |
| PERINDOPRIL ERBUMINE        |                   |                 |              |                    |                |
| PERMETHRIN                  |                   |                 |              |                    |                |
| PERPHENAZINE                |                   |                 |              |                    |                |
| PERSEITOL                   |                   |                 |              |                    |                |
| PERUVOSIDE                  |                   |                 |              |                    |                |
| PEUCENIN                    |                   |                 |              |                    |                |
| PHENACEMIDE                 |                   |                 |              |                    |                |
| PHENACETIN                  |                   |                 |              |                    |                |
| PHENACYLAMINE               |                   |                 |              |                    |                |
| HYDROCHLORIDE               |                   |                 |              |                    |                |
| PHENAZOPYRIDINE             |                   |                 |              |                    |                |
| HYDROCHLORIDE               |                   |                 |              |                    |                |
| PHENELZINE SULFATE          |                   |                 |              |                    |                |
| PHENETHYL CAFFEATE (CAPE)   |                   |                 |              |                    |                |
| PHENETHYLAMINE              |                   |                 |              |                    |                |
| HYDROCHLORIDE               |                   |                 |              |                    |                |
| PHENFORMIN HYDROCHLORIDE    |                   |                 |              |                    |                |
| PHENINDIONE                 |                   |                 |              |                    |                |
| PHENIRAMINE MALEATE         |                   |                 |              |                    |                |
| PHENOLPHTHALEIN             |                   |                 |              |                    |                |
| PHENOTHIAZINE               |                   |                 |              |                    |                |
| PHENOTHRIN                  |                   |                 |              |                    |                |
| PHENOXYBENZAMINE            |                   |                 |              |                    |                |
| HYDROCHLORIDE               |                   |                 |              |                    |                |
| PHENSUCCIMIDE               |                   |                 |              |                    |                |
| PHENTOLAMINE                |                   |                 |              |                    |                |
| HYDROCHLORIDE               |                   |                 |              |                    |                |
| PHENYL AMINOSALICYLATE      |                   |                 |              |                    |                |

| Spectrum library           | Prestwick library | Sequoia library | ENZO library | DNA damage library | Cayman library |
|----------------------------|-------------------|-----------------|--------------|--------------------|----------------|
| PHENYLBUTAZONE             |                   |                 |              |                    |                |
| PHENYLBUTYRATE SODIUM      |                   |                 |              |                    |                |
| PHENYLEPHRINE              |                   |                 |              |                    |                |
| HYDROCHLORIDE              |                   |                 |              |                    |                |
| PHENYLETHYL ALCOHOL        |                   |                 |              |                    |                |
| PHENYLMERCURIC ACETATE     |                   |                 |              |                    |                |
| PHENYLPROPANOLAMINE        |                   |                 |              |                    |                |
| HYDROCHLORIDE              |                   |                 |              |                    |                |
| PHENYTOIN SODIUM           |                   |                 |              |                    |                |
| PHLORACETOPHENONE          |                   |                 |              |                    |                |
| PHLORETIN                  |                   |                 |              |                    |                |
| PHLORIDZIN                 |                   |                 |              |                    |                |
| PHTHALYLSULFACETAMIDE      |                   |                 |              |                    |                |
| PHTHALYLSULFATHIAZOLE      |                   |                 |              |                    |                |
| PHYSCION                   |                   |                 |              |                    |                |
| PHYSOSTIGMINE SALICYLATE   |                   |                 |              |                    |                |
| PHYTOL                     |                   |                 |              |                    |                |
| PHYTONADIONE               |                   |                 |              |                    |                |
| PICEID                     |                   |                 |              |                    |                |
| PICOLAMINE                 |                   |                 |              |                    |                |
| PICONOL                    |                   |                 |              |                    |                |
| PICROPODOPHYLLIN           |                   |                 |              |                    |                |
| PICROPODOPHYLLIN ACETATE   |                   |                 |              |                    |                |
| PICROTIN                   |                   |                 |              |                    |                |
| PICROTOXININ               |                   |                 |              |                    |                |
| PIDOLIC ACID               |                   |                 |              |                    |                |
| PIDOTIMOD                  |                   |                 |              |                    |                |
| PILOCARPINE NITRATE        |                   |                 |              |                    |                |
| PIMAGEDINE HYDROCHLORIDE   |                   |                 |              |                    |                |
| PIMETHIXENE MALEATE        |                   |                 |              |                    |                |
| PIMOZIDE                   |                   |                 |              |                    |                |
| PIMPINELLIN                |                   |                 |              |                    |                |
| PINACIDIL                  |                   |                 |              |                    |                |
| PINDOLOL                   |                   |                 |              |                    |                |
| PINOSYLVIN                 |                   |                 |              |                    |                |
| PIOGLITAZONE               |                   |                 |              |                    |                |
| HYDROCHLORIDE              |                   |                 |              |                    |                |
| PIPAMPERONE                |                   |                 |              |                    |                |
| PIPEMIDIC ACID             |                   |                 |              |                    |                |
| PIPERACETAZINE             |                   |                 |              |                    |                |
| PIPERACILLIN SODIUM        |                   |                 |              |                    |                |
| PIPERAZINE                 |                   |                 |              |                    |                |
| PIPERIC ACID               |                   |                 |              |                    |                |
|                            |                   |                 |              |                    |                |
| PIPERIDOLATE HYDROCHLORIDE |                   |                 |              |                    |                |
| PIPERINE                   |                   |                 |              |                    |                |
| PIPERONYL BUTOXIDE         |                   |                 |              |                    |                |
| PIPERONYLIC ACID           |                   |                 |              |                    |                |
| PIPLARTINE                 |                   |                 |              |                    |                |
| PIPOBROMAN                 |                   |                 |              |                    |                |
| PIRACETAM                  |                   |                 |              |                    |                |
| PIRENPERONE                |                   |                 |              |                    |                |
| PIRENZEPINE HYDROCHLORIDE  |                   |                 |              |                    |                |
| PIROCTONE OLAMINE          |                   |                 |              |                    |                |
| PIROMIDIC ACID             |                   |                 |              |                    |                |
| PIROXICAM                  |                   |                 |              |                    |                |
| PISCIDIC ACID              |                   |                 |              |                    |                |
| PITAVASTATIN CALCIUM       |                   |                 |              |                    |                |
| PIZOTYLIN MALATE           |                   |                 |              |                    |                |
| PLUMBAGIN                  |                   |                 |              |                    |                |
| PODOFILOX                  |                   |                 |              |                    |                |
| PODOPHYLLIN ACETATE        |                   |                 |              |                    |                |
| PODOTOTARIN                |                   |                 |              |                    |                |
| POLYMYXIN B SULFATE        |                   |                 |              |                    |                |
| POMIFERIN                  |                   |                 |              |                    |                |
| POMIFERIN DIMETHYL ETHER   |                   |                 |              |                    |                |
| POMIFERIN TRIMETHYL ETHER  |                   |                 |              |                    |                |
| POTASSIUM p-               |                   |                 |              |                    |                |
| AMINOBENZOATE              |                   |                 |              |                    |                |
| PRALIDOXIME CHLORIDE       |                   |                 |              |                    |                |
| PRAMOXINE HYDROCHLORIDE    |                   |                 |              |                    |                |
| PRANOPROFEN                |                   |                 |              |                    |                |
| PRASTERONE                 |                   |                 |              |                    |                |
| PRASTERONE ACETATE         |                   |                 |              |                    |                |
| PRASUGREL                  |                   |                 |              |                    |                |
| PRAVASTATIN SODIUM         |                   |                 |              |                    |                |
| PRAZQUANTEL                |                   |                 |              |                    |                |
| PRAZOSIN HYDROCHLORIDE     |                   |                 |              |                    |                |
| PREDNICARBATE              |                   |                 |              |                    |                |
| PREDNISOLONE               |                   |                 |              |                    |                |
| PREDNISOLONE ACETATE       |                   |                 |              |                    |                |
| PREDNISOLONE               |                   |                 |              |                    |                |
| HEMISUCCINATE              |                   |                 |              |                    |                |
| PREDNISOLONE SODIUM        |                   |                 |              |                    |                |
| PHOSPHATE                  |                   |                 |              |                    |                |
| PREDNISOLONE TEBUTATE      |                   |                 |              |                    |                |
| PREDNISONE                 |                   |                 |              |                    |                |
| PREGABALIN                 |                   |                 |              |                    |                |
| PREGNENOLONE               |                   |                 |              |                    |                |
| PREGNENOLONE SUCCINATE     |                   |                 |              |                    |                |

| Spectrum library           | Prestwick library | Sequoia library | ENZO library | DNA damage library | Cayman library |
|----------------------------|-------------------|-----------------|--------------|--------------------|----------------|
| PRENYLETIN                 |                   |                 |              |                    |                |
| PRIDINOL METHANESULFONATE  |                   |                 |              |                    |                |
| PRILOCAINE HYDROCHLORIDE   |                   |                 |              |                    |                |
| PRIMAQUINE PHOSPHATE       |                   |                 |              |                    |                |
| PRIMIDONE                  |                   |                 |              |                    |                |
| PRIMULETIN                 |                   |                 |              |                    |                |
| PRISTIMERIN                |                   |                 |              |                    |                |
| PROADIFEN HYDROCHLORIDE    |                   |                 |              |                    |                |
| PROBENECID                 |                   |                 |              |                    |                |
| PROBUCOL                   |                   |                 |              |                    |                |
| PROCAINAMIDE               |                   |                 |              |                    |                |
| HYDROCHLORIDE              |                   |                 |              |                    |                |
| PROCAINE HYDROCHLORIDE     |                   |                 |              |                    |                |
| PROCARBAZINE               |                   |                 |              |                    |                |
| HYDROCHLORIDE              |                   |                 |              |                    |                |
| PROCHLORPERAZINE EDISYLATE |                   |                 |              |                    |                |
| PROCODAZOLE                |                   |                 |              |                    |                |
| PROCYCLIDINE               |                   |                 |              |                    |                |
| HYDROCHLORIDE              |                   |                 |              |                    |                |
| PROFLAVINE HEMISULFATE     |                   |                 |              |                    |                |
| PROGESTERONE               |                   |                 |              |                    |                |
| PROGLUMIDE                 |                   |                 |              |                    |                |
| PROMAZINE HYDROCHLORIDE    |                   |                 |              |                    |                |
| PROMETHAZINE               |                   |                 |              |                    |                |
| HYDROCHLORIDE              |                   |                 |              |                    |                |
| PRONETALOL HYDROCHLORIDE   |                   |                 |              |                    |                |
| PROPAFENONE                |                   |                 |              |                    |                |
| HYDROCHLORIDE              |                   |                 |              |                    |                |
| PROPANTHELINE BROMIDE      |                   |                 |              |                    |                |
| PROPARACAINE               |                   |                 |              |                    |                |
| HYDROCHLORIDE              |                   |                 |              |                    |                |
| PROPIOLACTONE              |                   |                 |              |                    |                |
| PROPOFOL                   |                   |                 |              |                    |                |
| PROPOXUR                   |                   |                 |              |                    |                |
| PROPOXYCAINE               |                   |                 |              |                    |                |
| HYDROCHLORIDE              |                   |                 |              |                    |                |
| PROPRANOLOL                |                   |                 |              |                    |                |
| HYDROCHLORIDE (+/-)        |                   |                 |              |                    |                |
| PROPYLTHIOURACIL           |                   |                 |              |                    |                |
| PROSCILLARIDIN             |                   |                 |              |                    |                |
| PROTIONAMIDE               |                   |                 |              |                    |                |
| PROTIRELIN                 |                   |                 |              |                    |                |
| PROTOPORPHYRIN IX          |                   |                 |              |                    |                |
| PROTRYPTYLINE              |                   |                 |              |                    |                |
| HYDROCHLORIDE              |                   |                 |              |                    |                |
| PROXYPHYLLINE              |                   |                 |              |                    |                |
| PRULIFLOXACIN              |                   |                 |              |                    |                |
| PSEUDO-ANISATIN            |                   |                 |              |                    |                |
| PSEUDOEPHEDRINE            |                   |                 |              |                    |                |
| HYDROCHLORIDE              |                   |                 |              |                    |                |
| PTAEROXYLIN                |                   |                 |              |                    |                |
| PUERARIN                   |                   |                 |              |                    |                |
| PUROMYCIN                  |                   |                 |              |                    |                |
| DIHYDROCHLORIDE            |                   |                 |              |                    |                |
| PURPURIN                   |                   |                 |              |                    |                |
| PURPUROGALLIN              |                   |                 |              |                    |                |
| PURPUROGALLIN-4-           |                   |                 |              |                    |                |
| CARBOXYLIC ACID            |                   |                 |              |                    |                |
| PUTRESCINE                 |                   |                 |              |                    |                |
| DIHYDROCHLORIDE            |                   |                 |              |                    |                |
| PYRANTEL PAMOATE           |                   |                 |              |                    |                |
| PYRAZINAMIDE               |                   |                 |              |                    |                |
| PYRETHRINS                 |                   |                 |              |                    |                |
| PYRIDOSTIGMINE BROMIDE     |                   |                 |              |                    |                |
| PYRIDOXINE                 |                   |                 |              |                    |                |
| PYRILAMINE MALEATE         |                   |                 |              |                    |                |
| PYRIMETHAMINE              |                   |                 |              |                    |                |
| PYRITHIONE ZINC            |                   |                 |              |                    |                |
| PYRITHYLDIONE              |                   |                 |              |                    |                |
| PYRITINOL                  |                   |                 |              |                    |                |
| PYROCATECHUIC ACID         |                   |                 |              |                    |                |
| PYRONARIDINE               |                   |                 |              |                    |                |
| TETRAPHOSPHATE             |                   |                 |              |                    |                |
| PYRROMYCIN                 |                   |                 |              |                    |                |
| PYRVINIUM PAMOATE          |                   |                 |              |                    |                |
| QUASSIN                    |                   |                 |              |                    |                |
| QUEBRACHITOL               |                   |                 |              |                    |                |
| QUERCETIN                  |                   |                 |              |                    |                |
| QUERCETIN 5,7,3',4'-       |                   |                 |              |                    |                |
| TETRAMETHYL ETHER          |                   |                 |              |                    |                |
| QUERCITRIN                 |                   |                 |              |                    |                |
| QUETIAPINE                 |                   |                 |              |                    |                |
| QUINACRINE HYDROCHLORIDE   |                   |                 |              |                    |                |
| QUINAPRIL HYDROCHLORIDE    |                   |                 |              |                    |                |
| QUINAPRILAT                |                   |                 |              |                    |                |
| QUINESTROL                 |                   |                 |              |                    |                |
| QUINETHAZONE               |                   |                 |              |                    |                |
| QUINIC ACID                |                   |                 |              |                    |                |
| QUINIDINE GLUCONATE        |                   |                 |              |                    |                |

| Spectrum library             | Prestwick library | Sequoia library | ENZO library | DNA damage library | Cayman library |
|------------------------------|-------------------|-----------------|--------------|--------------------|----------------|
| QUININE ETHYL CARBONATE      |                   |                 |              |                    |                |
| QUININE SULFATE              |                   |                 |              |                    |                |
| QUINOLINIC ACID              |                   |                 |              |                    |                |
| QUIPAZINE MALEATE            |                   |                 |              |                    |                |
| RABEPRAZOLE SODIUM           |                   |                 |              |                    |                |
| RACECADOTRIL                 |                   |                 |              |                    |                |
| RACEPHEDRINE                 |                   |                 |              |                    |                |
| HYDROCHLORIDE                |                   |                 |              |                    |                |
| RACTOPAMINE                  |                   |                 |              |                    |                |
| HYDROCHLORIDE                |                   |                 |              |                    |                |
| RALOXIFENE HYDROCHLORIDE     |                   |                 |              |                    |                |
| RAMELTEON                    |                   |                 |              |                    |                |
| RAMIFENAZONE                 |                   |                 |              |                    |                |
| RAMIPRIL                     |                   |                 |              |                    |                |
| RAMOPLANIN [A2 shown; 2mM]   |                   |                 |              |                    |                |
| RANITIDINE HYDROCHLORIDE     |                   |                 |              |                    |                |
| RANOLAZINE                   |                   |                 |              |                    |                |
| RASAGILINE                   |                   |                 |              |                    |                |
| RAUWOLSCINE                  |                   |                 |              |                    |                |
| HYDROCHLORIDE                |                   |                 |              |                    |                |
| REBAMIPIDE                   |                   |                 |              |                    |                |
| REPAGLINIDE                  |                   |                 |              |                    |                |
| RESERPINE                    |                   |                 |              |                    |                |
| RESORCINOL                   |                   |                 |              |                    |                |
| RESORCINOL MONOACETATE       |                   |                 |              |                    |                |
| RESVERATROL                  |                   |                 |              |                    |                |
| RESVERATROL 4'-METHYL ETHER  |                   |                 |              |                    |                |
| RETINOL                      |                   |                 |              |                    |                |
| RETINYL ACETATE              |                   |                 |              |                    |                |
| RETINYL PALMITATE            |                   |                 |              |                    |                |
| RETUSIN                      |                   |                 |              |                    |                |
| RHETSININE                   |                   |                 |              |                    |                |
| RHODINYL ACETATE             |                   |                 |              |                    |                |
| RHODOCLADONIC ACID           |                   |                 |              |                    |                |
| RHOIFOLIN                    |                   |                 |              |                    |                |
| RIBAVIRIN                    |                   |                 |              |                    |                |
| RIBOFLAVIN                   |                   |                 |              |                    |                |
| RIBOFLAVIN 5-PHOSPHATE       |                   |                 |              |                    |                |
| SODIUM                       |                   |                 |              |                    |                |
| RIBOSTAMYCIN SULFATE         |                   |                 |              |                    |                |
| RIFAMPIN                     |                   |                 |              |                    |                |
| RIFAXIMIN                    |                   |                 |              |                    |                |
| RILUZOLE                     |                   |                 |              |                    |                |
| RIMANTADINE                  |                   |                 |              |                    |                |
| HYDROCHLORIDE                |                   |                 |              |                    |                |
| RISEDRONATE SODIUM           |                   |                 |              |                    |                |
| RISPERIDONE                  |                   |                 |              |                    |                |
| RITANSERIN                   |                   |                 |              |                    |                |
| RITODRINE HYDROCHLORIDE      |                   |                 |              |                    |                |
| RITONAVIR                    |                   |                 |              |                    |                |
| RIVASTIGMINE TARTRATE        |                   |                 |              |                    |                |
| RIZATRIPTAN BENZOATE         |                   |                 |              |                    |                |
| ROBUSTIC ACID                |                   |                 |              |                    |                |
| ROCCELIC ACID                |                   |                 |              |                    |                |
| ROFECOXIB                    |                   |                 |              |                    |                |
| ROLIPRAM                     |                   |                 |              |                    |                |
| ROLITETRACYCLINE             |                   |                 |              |                    |                |
| RONIDAZOLE                   |                   |                 |              |                    |                |
| ROPINIROLE HYDROCHLORIDE     |                   |                 |              |                    |                |
| ROSIGLITAZONE MALEATE        |                   |                 |              |                    |                |
| ROSMARINIC ACID              |                   |                 |              |                    |                |
| ROSOLIC ACID                 |                   |                 |              |                    |                |
| ROSUVASTATIN CALCIUM         |                   |                 |              |                    |                |
| ROTENONE                     |                   |                 |              |                    |                |
| ROTENONIC ACID, METHYL ETHER |                   |                 |              |                    |                |
| ROXARSONE                    |                   |                 |              |                    |                |
| ROXATIDINE ACETATE           |                   |                 |              |                    |                |
| HYDROCHLORIDE                |                   |                 |              |                    |                |
| ROXITHROMYCIN                |                   |                 |              |                    |                |
| RUFLOXACIN HYDROCHLORIDE     |                   |                 |              |                    |                |
| RUTILANTINONE                |                   |                 |              |                    |                |
| RUTIN                        |                   |                 |              |                    |                |
| SACCHARIN                    |                   |                 |              |                    |                |
| SAFROLE                      |                   |                 |              |                    |                |
| SALICIN                      |                   |                 |              |                    |                |
| SALICYL ALCOHOL              |                   |                 |              |                    |                |
| SALICYLAMIDE                 |                   |                 |              |                    |                |
| SALICYLANILIDE               |                   |                 |              |                    |                |
| SALIDROSIDE                  |                   |                 |              |                    |                |
| SALINOMYCIN, SODIUM          |                   |                 |              |                    |                |
| SALSALATE                    |                   |                 |              |                    |                |
| SALSOLIDINE                  |                   |                 |              |                    |                |
| SALSOLINE                    |                   |                 |              |                    |                |
| SALSOLINOL HYDROBROMIDE      |                   |                 |              |                    |                |
| SALVINORIN A                 |                   |                 |              |                    |                |
| SANGUINARINE SULFATE         |                   |                 |              |                    |                |
| SANTONIN                     |                   |                 |              |                    |                |

| Spectrum library                      | Prestwick library | Sequoia library | ENZO library | DNA damage library | Cayman library |
|---------------------------------------|-------------------|-----------------|--------------|--------------------|----------------|
| SAPPANONE A DIMETHYL ETHER            |                   |                 |              |                    |                |
| SAPPANONE A TRIMETHYL ETHER           |                   |                 |              |                    |                |
| SARAFLOXACIN                          |                   |                 |              |                    |                |
| HYDROCHLORIDE                         |                   |                 |              |                    |                |
| SAXAGLIPTIN                           |                   |                 |              |                    |                |
| SCLAREOLIDE                           |                   |                 |              |                    |                |
| SCOPOLAMINE HYDROBROMIDE              |                   |                 |              |                    |                |
| SECNIDAZOLE                           |                   |                 |              |                    |                |
| SECURININE                            |                   |                 |              |                    |                |
| SELAMECTIN                            |                   |                 |              |                    |                |
| SELEGILINE HYDROCHLORIDE              |                   |                 |              |                    |                |
| SELENOMETHIONINE                      |                   |                 |              |                    |                |
| SEMUSTINE                             |                   |                 |              |                    |                |
| SERATRODAST                           |                   |                 |              |                    |                |
| SEROTONIN HYDROCHLORIDE               |                   |                 |              |                    |                |
| SERTRALINE HYDROCHLORIDE              |                   |                 |              |                    |                |
| SEVOFLURANE                           |                   |                 |              |                    |                |
| SHIKIMIC ACID                         |                   |                 |              |                    |                |
| SIBUTRAMINE HYDROCHLORIDE             |                   |                 |              |                    |                |
| SILDENAFIL CITRATE                    |                   |                 |              |                    |                |
| SIMVASTATIN                           |                   |                 |              |                    |                |
| SINAPIC ACID                          |                   |                 |              |                    |                |
| SINAPIC ACID METHYL ETHER             |                   |                 |              |                    |                |
| SINENSETIN                            |                   |                 |              |                    |                |
| SINOMENINE                            |                   |                 |              |                    |                |
| SIROLIMUS                             |                   |                 |              |                    |                |
| S-ISOCORYDINE (+)                     |                   |                 |              |                    |                |
| SISOMICIN SULFATE                     |                   |                 |              |                    |                |
| SITAGLIPTIN MONOPHOSPHATE MONOHYDRATE |                   |                 |              |                    |                |
| SITOSTERYL ACETATE                    |                   |                 |              |                    |                |
| SKATOLE                               |                   |                 |              |                    |                |
| SMILAGENIN                            |                   |                 |              |                    |                |
| SMILAGENIN ACETATE                    |                   |                 |              |                    |                |
| SODIUM CYCLAMATE                      |                   |                 |              |                    |                |
| SODIUM GLUCONATE                      |                   |                 |              |                    |                |
| SODIUM                                |                   |                 |              |                    |                |
| MONOFLUOROPHOSPHATE                   |                   |                 |              |                    |                |
| SODIUM NITROPRUSSIDE                  |                   |                 |              |                    |                |
| SODIUM OXYBATE                        |                   |                 |              |                    |                |
| SODIUM PHENYLACETATE                  |                   |                 |              |                    |                |
| SODIUM PHENYLBUTYRATE                 |                   |                 |              |                    |                |
| SODIUM SALICYLATE                     |                   |                 |              |                    |                |
| SODIUM TETRADECYL SULFATE             |                   |                 |              |                    |                |
| SODIUM THIOGLYCOLATE                  |                   |                 |              |                    |                |
| SOLANESOL                             |                   |                 |              |                    |                |
| SOLANESYL ACETATE                     |                   |                 |              |                    |                |
| SOLASODINE                            |                   |                 |              |                    |                |
| SOLIDAGENONE                          |                   |                 |              |                    |                |
| SOLIFENACIN SUCCINATE                 |                   |                 |              |                    |                |
| SORBITOL                              |                   |                 |              |                    |                |
| SOTALOL HYDROCHLORIDE                 |                   |                 |              |                    |                |
| SPAGLUMIC ACID                        |                   |                 |              |                    |                |
| SPARFLOXACIN                          |                   |                 |              |                    |                |
| SPARTEINE SULFATE                     |                   |                 |              |                    |                |
| SPECTINOMYCIN                         |                   |                 |              |                    |                |
| HYDROCHLORIDE                         |                   |                 |              |                    |                |
| SPERMIDINE                            |                   |                 |              |                    |                |
| TRIHYDROCHLORIDE                      |                   |                 |              |                    |                |
| SPERMINE                              |                   |                 |              |                    |                |
| SPHONDIN                              |                   |                 |              |                    |                |
| SPIPERONE                             |                   |                 |              |                    |                |
| SPIRAMYCIN                            |                   |                 |              |                    |                |
| SPIRONOLACTONE                        |                   |                 |              |                    |                |
| STAVUDINE                             |                   |                 |              |                    |                |
| STICTIC ACID                          |                   |                 |              |                    |                |
| STIGMASTA-4,22-DIEN-3-ONE             |                   |                 |              |                    |                |
| STIGMASTEROL                          |                   |                 |              |                    |                |
| STREPTOMYCIN SULFATE                  |                   |                 |              |                    |                |
| STREPTOZOSIN                          |                   |                 |              |                    |                |
| STROPHANTHIDIN                        |                   |                 |              |                    |                |
| STROPHANTHIDINIC ACID                 |                   |                 |              |                    |                |
| LACTONE ACETATE                       |                   |                 |              |                    |                |
| STRYCHNINE                            |                   |                 |              |                    |                |
| STRYCHNINE METHIODIDE                 |                   |                 |              |                    |                |
| SUCCINYLSULFATHIAZOLE                 |                   |                 |              |                    |                |
| SUCRALFATE                            |                   |                 |              |                    |                |
| SUCRALOSE                             |                   |                 |              |                    |                |
| SULBACTAM                             |                   |                 |              |                    |                |
| SULBENTINE                            |                   |                 |              |                    |                |
| SULCONAZOLE NITRATE                   |                   |                 |              |                    |                |
| SULFABENZAMIDE                        |                   |                 |              |                    |                |
| SULFACARBAMIDE                        |                   |                 |              |                    |                |
| SULFACETAMIDE                         |                   |                 |              |                    |                |
| SULFACHLORPYRIDAZINE                  |                   |                 |              |                    |                |
| SULFADIAZINE                          |                   |                 |              |                    |                |

| Spectrum library           | Prestwick library | Sequoia library | ENZO library | DNA damage library | Cayman library |
|----------------------------|-------------------|-----------------|--------------|--------------------|----------------|
| SULFADIMETHOXINE           |                   |                 |              |                    |                |
| SULFADOXINE                |                   |                 |              |                    |                |
| SULFAGUANIDINE             |                   |                 |              |                    |                |
| SULFAMERAZINE              |                   |                 |              |                    |                |
| SULFAMETER                 |                   |                 |              |                    |                |
| SULFAMETHAZINE             |                   |                 |              |                    |                |
| SULFAMETHIZOLE             |                   |                 |              |                    |                |
| SULFAMETHOXAZOLE           |                   |                 |              |                    |                |
| SULFAMETHOXYPYRIDAZINE     |                   |                 |              |                    |                |
| SULFAMONOMETHOXINE         |                   |                 |              |                    |                |
| SULFANILAMIDE              |                   |                 |              |                    |                |
| SULFANILATE ZINC           |                   |                 |              |                    |                |
| SULFANITRAN                |                   |                 |              |                    |                |
| SULFAPHENAZOLE             |                   |                 |              |                    |                |
| SULFAPYRIDINE              |                   |                 |              |                    |                |
| SULFAQUINOXALINE SODIUM    |                   |                 |              |                    |                |
| SULFASALAZINE              |                   |                 |              |                    |                |
| SULFATHIAZOLE              |                   |                 |              |                    |                |
| SULFINPYRAZONE             |                   |                 |              |                    |                |
| SULFISOXAZOLE              |                   |                 |              |                    |                |
| SULFISOXAZOLE ACETYL       |                   |                 |              |                    |                |
| SULINDAC                   |                   |                 |              |                    |                |
| SULISOBENZONE              |                   |                 |              |                    |                |
| SULMAZOLE                  |                   |                 |              |                    |                |
| SULCTIDIL                  |                   |                 |              |                    |                |
| SULPIRIDE                  |                   |                 |              |                    |                |
| SUMATRIPTAN SUCCINATE      |                   |                 |              |                    |                |
| SURAMIN HEXASODIUM         |                   |                 |              |                    |                |
| SUXIBUZONE                 |                   |                 |              |                    |                |
| SYMCLOSENE                 |                   |                 |              |                    |                |
| SYRINGIC ACID              |                   |                 |              |                    |                |
| TACRINE HYDROCHLORIDE      |                   |                 |              |                    |                |
| TACROLIMUS                 |                   |                 |              |                    |                |
| TADALAFIL                  |                   |                 |              |                    |                |
| TAMOXIFEN CITRATE          |                   |                 |              |                    |                |
| TANDUTINIB                 |                   |                 |              |                    |                |
| TANGERITIN                 |                   |                 |              |                    |                |
| TANNIC ACID                |                   |                 |              |                    |                |
| TANSHINONE IIA             |                   |                 |              |                    |                |
| TANSHINONE IIA SULFONATE   |                   |                 |              |                    |                |
| SODIUM                     |                   |                 |              |                    |                |
| TAPENTADOL HYDROCHLORIDE   |                   |                 |              |                    |                |
| TAURINE                    |                   |                 |              |                    |                |
| TAZOBACTAM                 |                   |                 |              |                    |                |
| TEGASEROD MALEATE          |                   |                 |              |                    |                |
| TEICOPLANIN [A(2-1) shown] |                   |                 |              |                    |                |
| TELENZEPINE HYDROCHLORIDE  |                   |                 |              |                    |                |
| TELITHROMYCIN              |                   |                 |              |                    |                |
| TELMISARTAN                |                   |                 |              |                    |                |
| TEMOZOLAMIDE               |                   |                 |              |                    |                |
| TENATOPRAZOLE              |                   |                 |              |                    |                |
| TENIPOSIDE                 |                   |                 |              |                    |                |
| TENOFOVIR                  |                   |                 |              |                    |                |
| TENOXICAM                  |                   |                 |              |                    |                |
| TENYLIDONE                 |                   |                 |              |                    |                |
| TEPOXALIN                  |                   |                 |              |                    |                |
| TERAZOSIN HYDROCHLORIDE    |                   |                 |              |                    |                |
| TERBINAFINE HYDROCHLORIDE  |                   |                 |              |                    |                |
| TERBUTALINE HEMISULFATE    |                   |                 |              |                    |                |
| TERCONAZOLE                |                   |                 |              |                    |                |
| TERFENADINE                |                   |                 |              |                    |                |
| TERPENE HYDRATE            |                   |                 |              |                    |                |
| TESTOSTERONE               |                   |                 |              |                    |                |
| TESTOSTERONE PROPIONATE    |                   |                 |              |                    |                |
| TETRACAINE HYDROCHLORIDE   |                   |                 |              |                    |                |
| TETRACYCLINE               |                   |                 |              |                    |                |
| HYDROCHLORIDE              |                   |                 |              |                    |                |
| TETRAHYDROGAMBOGIC ACID    |                   |                 |              |                    |                |
| TETRAHYDROSAPPANONE A      |                   |                 |              |                    |                |
| TRIMETHYL ETHER            |                   |                 |              |                    |                |
| TETRAHYDROZOLINE           |                   |                 |              |                    |                |
| HYDROCHLORIDE              |                   |                 |              |                    |                |
| TETRAMIZOLE HYDROCHLORIDE  |                   |                 |              |                    |                |
| TETRANDRINE                |                   |                 |              |                    |                |
| TETROQUINONE               |                   |                 |              |                    |                |
| THALIDOMIDE                |                   |                 |              |                    |                |
| THEAFLAVIN                 |                   |                 |              |                    |                |
| THEAFLAVIN MONOGALLATES    |                   |                 |              |                    |                |
| THEANINE POTASSIUM         |                   |                 |              |                    |                |
| THEOBROMINE                |                   |                 |              |                    |                |
| THEOPHYLLINE               |                   |                 |              |                    |                |
| THIABENDAZOLE              |                   |                 |              |                    |                |
| THIAMINE                   |                   |                 |              |                    |                |
| THIAMPHENICOL              |                   |                 |              |                    |                |
| THIAMYLAL SODIUM           |                   |                 |              |                    |                |
| THIMEROSAL                 |                   |                 |              |                    |                |
| THIOCTIC ACID              |                   |                 |              |                    |                |
| THIODIGLYCOL               |                   |                 |              |                    |                |
| THIOGUANINE                |                   |                 |              |                    |                |

| Spectrum library                            | Prestwick library | Sequoia library | ENZO library | DNA damage library | Cayman library |
|---------------------------------------------|-------------------|-----------------|--------------|--------------------|----------------|
| THIOGUANOSINE                               |                   |                 |              |                    |                |
| THIOPENTAL SODIUM                           |                   |                 |              |                    |                |
|                                             |                   |                 |              |                    |                |
| THIORIDAZINE HYDROCHLORIDE                  |                   |                 |              |                    |                |
| THIOSTREPTON                                |                   |                 |              |                    |                |
| THIOTEPA                                    |                   |                 |              |                    |                |
| THIOTHIXENE                                 |                   |                 |              |                    |                |
| THIRAM                                      |                   |                 |              |                    |                |
| THONZONIUM BROMIDE                          |                   |                 |              |                    |                |
| THONZYLAMINE                                |                   |                 |              |                    |                |
| HYDROCHLORIDE                               |                   |                 |              |                    |                |
| THYMOPENTIN                                 |                   |                 |              |                    |                |
| THYMOQUINONE                                |                   |                 |              |                    |                |
| TIAPRIDE HYDROCHLORIDE                      |                   |                 |              |                    |                |
| TIBOLONE                                    |                   |                 |              |                    |                |
| TICARCILLIN DISODIUM                        |                   |                 |              |                    |                |
| TICLOPIDINE HYDROCHLORIDE                   |                   |                 |              |                    |                |
| TIGECYCLINE                                 |                   |                 |              |                    |                |
| TIGOGENIN                                   |                   |                 |              |                    |                |
| TILETAMINE HYDROCHLORIDE                    |                   |                 |              |                    |                |
| TILMICOSIN                                  |                   |                 |              |                    |                |
| TILORONE                                    |                   |                 |              |                    |                |
| TIMOLOL MALEATE                             |                   |                 |              |                    |                |
| TIMONACIC                                   |                   |                 |              |                    |                |
| TINIDAZOLE                                  |                   |                 |              |                    |                |
| TIOCONAZOLE                                 |                   |                 |              |                    |                |
| TIOPRONIN                                   |                   |                 |              |                    |                |
| TIOXOLONE                                   |                   |                 |              |                    |                |
| TIRATRICOL                                  |                   |                 |              |                    |                |
| TOBRAMYCIN                                  |                   |                 |              |                    |                |
|                                             |                   |                 |              |                    |                |
| TODRALAZINE HYDROCHLORIDE                   |                   |                 |              |                    |                |
| TOLAZAMIDE                                  |                   |                 |              |                    |                |
| TOLAZOLINE HYDROCHLORIDE                    |                   |                 |              |                    |                |
| TOLBUTAMIDE                                 |                   |                 |              |                    |                |
| TOLFENAMIC ACID                             |                   |                 |              |                    |                |
| TOLMETIN SODIUM                             |                   |                 |              |                    |                |
| TOLNAFTATE                                  |                   |                 |              |                    |                |
| TOLONIUM CHLORIDE                           |                   |                 |              |                    |                |
| TOLPERISONE HYDROCHLORIDE                   |                   |                 |              |                    |                |
| TOLTRAZURIL                                 |                   |                 |              |                    |                |
| TOMATIDINE HYDROCHLORIDE                    |                   |                 |              |                    |                |
| TOMATINE                                    |                   |                 |              |                    |                |
| TOPIRAMATE                                  |                   |                 |              |                    |                |
| TOPOTECAN HYDROCHLORIDE                     |                   |                 |              |                    |                |
| TOREMIPHENE CITRATE                         |                   |                 |              |                    |                |
| TORSEMIDE                                   |                   |                 |              |                    |                |
| TOTAROL                                     |                   |                 |              |                    |                |
| TOTAROL-19-CARBOXYLIC ACID,<br>METHYL ESTER |                   |                 |              |                    |                |
| TRAMADOL HYDROCHLORIDE                      |                   |                 |              |                    |                |
| TRANDOLAPRIL                                |                   |                 |              |                    |                |
| TRANEXAMIC ACID                             |                   |                 |              |                    |                |
| TRANILAST                                   |                   |                 |              |                    |                |
| TRANLYCYPROMINE SULFATE                     |                   |                 |              |                    |                |
| TRAZODONE HYDROCHLORIDE                     |                   |                 |              |                    |                |
| TRETINOIN                                   |                   |                 |              |                    |                |
| TRIACETIN                                   |                   |                 |              |                    |                |
| TRIACETYLRESVERATROL                        |                   |                 |              |                    |                |
| TRIAMCINOLONE                               |                   |                 |              |                    |                |
| TRIAMCINOLONE ACETONIDE                     |                   |                 |              |                    |                |
| TRIAMCINOLONE DIACETATE                     |                   |                 |              |                    |                |
| TRIAMTERENE                                 |                   |                 |              |                    |                |
| TRICHLORFON                                 |                   |                 |              |                    |                |
| TRICHLORMETHIAZIDE                          |                   |                 |              |                    |                |
| TRICHLORMETHINE                             |                   |                 |              |                    |                |
| HYDROCHLORIDE                               |                   |                 |              |                    |                |
| TRICLOSAN                                   |                   |                 |              |                    |                |
| TRIENTINE HYDROCHLORIDE                     |                   |                 |              |                    |                |
| TRIFLUOPERAZINE                             |                   |                 |              |                    |                |
| HYDROCHLORIDE                               |                   |                 |              |                    |                |
| TRIFLUPROMAZINE                             |                   |                 |              |                    |                |
| HYDROCHLORIDE                               |                   |                 |              |                    |                |
| TRIFLURIDINE                                |                   |                 |              |                    |                |
| TRIGONELLINE                                |                   |                 |              |                    |                |
| TRIHEXYPHENIDYL                             |                   |                 |              |                    |                |
| HYDROCHLORIDE                               |                   |                 |              |                    |                |
| TRILOSTANE                                  |                   |                 |              |                    |                |
| TRIMEBUTINE MALEATE                         |                   |                 |              |                    |                |
| TRIMEDLURE                                  |                   |                 |              |                    |                |
| TRIMEPRAZINE TARTRATE                       |                   |                 |              |                    |                |
| TRIMETAZIDINE                               |                   |                 |              |                    |                |
| DIHYDROCHLORIDE                             |                   |                 |              |                    |                |
| TRIMETHADIONE                               |                   |                 |              |                    |                |
| TRIMETHOBENZAMIDE                           |                   |                 |              |                    |                |
| HYDROCHLORIDE                               |                   |                 |              |                    |                |
| TRIMETHOPRIM                                |                   |                 |              |                    |                |
| TRIMETOZINE                                 |                   |                 |              |                    |                |
| TRIMIPRAMINE MALEATE                        |                   |                 |              |                    |                |
| TRIOXSALEN                                  |                   |                 |              |                    |                |

| Spectrum library           | Prestwick library | Sequoia library | ENZO library | DNA damage library | Cayman library |
|----------------------------|-------------------|-----------------|--------------|--------------------|----------------|
| TRIPLENNAMINE CITRATE      |                   |                 |              |                    |                |
| TRIPROLIDINE HYDROCHLORIDE |                   |                 |              |                    |                |
| TRIPTOPHENOLIDE            |                   |                 |              |                    |                |
| TRISODIUM ETHYLENEDIAMINE  |                   |                 |              |                    |                |
| TETRACETATE                |                   |                 |              |                    |                |
| TROCLOSENE POTASSIUM       |                   |                 |              |                    |                |
| TROLEANDOMYCIN             |                   |                 |              |                    |                |
| TROLOX                     |                   |                 |              |                    |                |
| TROPICAMIDE                |                   |                 |              |                    |                |
| TROPISETRON HYDROCHLORIDE  |                   |                 |              |                    |                |
| TROSPIMUM CHLORIDE         |                   |                 |              |                    |                |
| TROXERUTIN                 |                   |                 |              |                    |                |
| TRYPTAMINE                 |                   |                 |              |                    |                |
| TRYPTOPHAN                 |                   |                 |              |                    |                |
| TUAMINOHEPTANE SULFATE     |                   |                 |              |                    |                |
| TUBOCURARINE CHLORIDE      |                   |                 |              |                    |                |
| TULOBUTEROL                |                   |                 |              |                    |                |
| HYDROCHLORIDE              |                   |                 |              |                    |                |
| TYLOSIN TARTRATE           |                   |                 |              |                    |                |
| TYLOXAPOL                  |                   |                 |              |                    |                |
| TYRAMINE                   |                   |                 |              |                    |                |
| TYROSINE                   |                   |                 |              |                    |                |
| TYROTHRICIN                |                   |                 |              |                    |                |
| UBIDECARENEONE             |                   |                 |              |                    |                |
| UMBELLIFERONE              |                   |                 |              |                    |                |
| UNDECYLENIC ACID           |                   |                 |              |                    |                |
| URACIL                     |                   |                 |              |                    |                |
| URAPIDIL HYDROCHLORIDE     |                   |                 |              |                    |                |
| UREA                       |                   |                 |              |                    |                |
| URETHANE                   |                   |                 |              |                    |                |
| URIDINE                    |                   |                 |              |                    |                |
| URIDINE TRIPHOSPHATE       |                   |                 |              |                    |                |
| TRISODIUM                  |                   |                 |              |                    |                |
| URSINOIC ACID              |                   |                 |              |                    |                |
| URSOCHOLANIC ACID          |                   |                 |              |                    |                |
| URSODIOL                   |                   |                 |              |                    |                |
| USNIC ACID                 |                   |                 |              |                    |                |
| UTILIN                     |                   |                 |              |                    |                |
| VALACYCLOVIR               |                   |                 |              |                    |                |
| HYDROCHLORIDE              |                   |                 |              |                    |                |
| VALERYL SALICYLATE         |                   |                 |              |                    |                |
| VALGANCICLOVIR             |                   |                 |              |                    |                |
| HYDROCHLORIDE              |                   |                 |              |                    |                |
| VALINOMYCIN                |                   |                 |              |                    |                |
| VALPROATE SODIUM           |                   |                 |              |                    |                |
| VALSARTAN                  |                   |                 |              |                    |                |
| VANCOMYCIN HYDROCHLORIDE   |                   |                 |              |                    |                |
| VARDENAFIL HYDROCHLORIDE   |                   |                 |              |                    |                |
| VECURONIUM BROMIDE         |                   |                 |              |                    |                |
| VENLAFAXINE HYDROCHLORIDE  |                   |                 |              |                    |                |
| VERAPAMIL HYDROCHLORIDE    |                   |                 |              |                    |                |
| VERATRIC ACID              |                   |                 |              |                    |                |
| VERATRINE SULFATE          |                   |                 |              |                    |                |
| VERBENALIN                 |                   |                 |              |                    |                |
| VESAMICOL HYDROCHLORIDE    |                   |                 |              |                    |                |
| VIDARABINE                 |                   |                 |              |                    |                |
| VIGABATRIN                 |                   |                 |              |                    |                |
| VILAZODONE HYDROCHLORIDE   |                   |                 |              |                    |                |
| VINBLASTINE SULFATE        |                   |                 |              |                    |                |
| VINCAMINE                  |                   |                 |              |                    |                |
| VINCRISTINE SULFATE        |                   |                 |              |                    |                |
| VINPOCETINE                |                   |                 |              |                    |                |
| VIOLASTYRENE               |                   |                 |              |                    |                |
| VIOMYCIN SULFATE           |                   |                 |              |                    |                |
| VISNAGIN                   |                   |                 |              |                    |                |
| VORICONAZOLE               |                   |                 |              |                    |                |
| VORINOSTAT                 |                   |                 |              |                    |                |
| VULPINIC ACID              |                   |                 |              |                    |                |
| WARFARIN                   |                   |                 |              |                    |                |
| XANTHONE                   |                   |                 |              |                    |                |
| XANTHOPTERIN               |                   |                 |              |                    |                |
| XANTHOXYLIN                |                   |                 |              |                    |                |
| XANTHURENIC ACID           |                   |                 |              |                    |                |
| XANTHYLETIN                |                   |                 |              |                    |                |
| XYLAZINE                   |                   |                 |              |                    |                |
| XYLOCARPUS A               |                   |                 |              |                    |                |
| XYLOMETAZOLINE             |                   |                 |              |                    |                |
| HYDROCHLORIDE              |                   |                 |              |                    |                |
| YOHIMBIC ACID HYDRATE      |                   |                 |              |                    |                |
| YOHIMBINE HYDROCHLORIDE    |                   |                 |              |                    |                |
| ZALCITABINE                |                   |                 |              |                    |                |
| ZALEPLON                   |                   |                 |              |                    |                |
| ZAPRINAST                  |                   |                 |              |                    |                |
| ZIDOVUDINE [AZT]           |                   |                 |              |                    |                |
| ZILEUTON                   |                   |                 |              |                    |                |
| ZINC UNDECYLENATE          |                   |                 |              |                    |                |
| ZIPRASIDONE MESYLATE       |                   |                 |              |                    |                |

| Spectrum library | Prestwick library | Sequoia library | ENZO library | DNA damage library | Cayman library |
|------------------|-------------------|-----------------|--------------|--------------------|----------------|
| ZOLMITRIPTAN     |                   |                 |              |                    |                |
| ZOLPIDEM         |                   |                 |              |                    |                |
| ZOMEPIRAC SODIUM |                   |                 |              |                    |                |
| ZOXAZOLAMINE     |                   |                 |              |                    |                |

Supplemental table 11. Clinical characteristics of the drug screen samples

| Sample | Rearrangement | FAB type | FLT3-ITD | Age at diagnosis | WBC at diagnosis | SCT | Event | Time to event (months) | Dead/alive | Cause of death | Time to death (months) | Follow up time (years) | Remarks                    |
|--------|---------------|----------|----------|------------------|------------------|-----|-------|------------------------|------------|----------------|------------------------|------------------------|----------------------------|
| #1     | NUP98-KDM5A   | M5       | No       | 14.0974948       | 12.4             | No  | Yes   | 10.7                   | Dead       | Hemorrhage     | 13.30623903            | 1.108853252            | No clinical data available |
| #2     | NUP98-KDM5A   | M7       |          |                  |                  |     |       |                        |            |                |                        |                        |                            |
| #3     | NUP98-NSD1    | M4       | Yes      | 9.648392244      | 121.3            | No  | Yes   | 8.706551462            | Alive      |                |                        | 1.713931199            |                            |
| #4     | NUP98-NSD1    | M4       | Yes      | 2.362815694      | 267.3            | Yes | Yes   | 6.932386259            | Dead       | Leukemia       | 9.955038087            | 0.829586507            |                            |
| #5     | NUP98-NSD1    | M4       | Yes      | 2.250561414      | 153              | No  | Yes   | 7.195225548            | Alive      |                |                        | 5.9111461              |                            |

**Supplemental table 12. The IC50 values of drug candidates on primary NUP98-r AML cells.**

|                      | IC50 (nM)   |       |            |       |       |
|----------------------|-------------|-------|------------|-------|-------|
|                      | NUP98-KDM5A |       | NUP98-NSD1 |       |       |
|                      | 1           | 2     | 3          | 4     | 5     |
| <b>Vincristine</b>   | 25.6        | 17.9  | >IC50      | >IC50 | >IC50 |
| <b>Fosbretabulin</b> | 142         | 20.2  | >IC50      | >IC50 | >IC50 |
| <b>OTX-015</b>       | 28.2        | 98.8  | 582        | 210.2 | 505.6 |
| <b>ARV825</b>        | 2.4         | 2.9   | 1.8        | 2     | 2.7   |
| <b>Dinaciclib</b>    | 8           | 8     | 8.6        | 7.6   | 7.1   |
| <b>CDKI-73</b>       | 45.6        | 45    | 77.3       | 49    | 58.2  |
| <b>Omipalisib</b>    | 1.6         | 2.2   | >IC50      | 98.2  | 95.4  |
| <b>Trametinib</b>    | <IC50       | 193.6 | 291.9      | 12.3  | 4.2   |
| <b>Ganetespib</b>    | 18.8        | 19    | 15.6       | 14.2  | 16.2  |

## References

1. Gamis AS, Alonzo TA, Perentesis JP, Meshinchi S. Children's Oncology Group's 2013 blueprint for research: acute myeloid leukemia. *Pediatric blood & cancer*. 2013;60(6):964-971.
2. Balgobind BV, Hollink IH, Arentsen-Peters ST, et al. Integrative analysis of type-I and type-II aberrations underscores the genetic heterogeneity of pediatric acute myeloid leukemia. *Haematologica*. 2011;96(10):1478-1487.
3. de Rooij JD, Hollink IH, Arentsen-Peters ST, et al. NUP98/JARID1A is a novel recurrent abnormality in pediatric acute megakaryoblastic leukemia with a distinct HOX gene expression pattern. *Leukemia*. 2013;27(12):2280-2288.
4. Valk PJ, Verhaak RG, Beijen MA, et al. Prognostically useful gene-expression profiles in acute myeloid leukemia. *N Engl J Med*. 2004;350(16):1617-1628.
5. Subramanian A, Narayan R, Corsello SM, et al. A Next Generation Connectivity Map: L1000 Platform and the First 1,000,000 Profiles. *Cell*. 2017;171(6):1437-1452.e1417.
6. Stam RW, den Boer ML, Schneider P, et al. Targeting FLT3 in primary MLL-gene-rearranged infant acute lymphoblastic leukemia. *Blood*. 2005;106(7):2484-2490.
7. Pieters R, Loonen AH, Huismans DR, et al. In vitro drug sensitivity of cells from children with leukemia using the MTT assay with improved culture conditions. *Blood*. 1990;76(11):2327-2336.
8. Kaplan EL, Meier P. Nonparametric Estimation from Incomplete Observations. *Journal of the American Statistical Association*. 1958;53(282):457-481.
9. Kalbfleisch JD. The statistical analysis of failure time data / J.D. Kalbfleisch, R.L. Prentice. New York: Wiley, 1980.
10. Cox DR. Regression Models and Life-Tables. *Journal of the Royal Statistical Society: Series B (Methodological)*. 1972;34(2):187-202.
11. Fine JP, Gray RJ. A Proportional Hazards Model for the Subdistribution of a Competing Risk. *Journal of the American Statistical Association*. 1999;94(446):496-509.
